# Supplementary material for: Diversity-oriented synthesis of imidazo[2,1-a]isoquinolines
Source: Royal Society of Chemistry journal article supplement (doi:10.1039/c8cc05390a), 2018-01-01

## Electronic Supplementary Information

### Diversity-oriented Synthesis of Imidazo[2,1-*a*]isoquinolines

Shaoyu Mai,<sup>a</sup> Yixin Luo,<sup>b</sup> Xianyun Huang,<sup>a</sup> Zhenghao Shu,<sup>a</sup> Bingnan Li,<sup>a</sup> Yu Lan,<sup>b</sup>  
and Qiuling Song<sup>a,\*</sup>

<sup>a</sup> Institute of Next Generation Matter Transformation, College of Chemical Engineering at  
Huaqiao University, 668 Jimei Blvd, Xiamen, Fujian, 361021, P. R. China

<sup>b</sup> School of Chemistry and Chemical Engineering, Chongqing University, Chongqing, 400030, P.  
R. China

\*E-mail: qsong@hqu.edu.cn

#### Table of Contents:

|                                                                                |     |
|--------------------------------------------------------------------------------|-----|
| 1. General Information.....                                                    | S2  |
| 2. Optimization of the Reaction Conditions .....                               | S3  |
| 3. General Procedure for Cp*Rh <sup>III</sup> -catalyzed [4+2] annulation..... | S4  |
| 4. Synthetic Applications .....                                                | S6  |
| 5. Mechanistic Studies .....                                                   | S11 |
| 6. Crystal Structure of Products .....                                         | S12 |
| 7. Characterization of Products.....                                           | S23 |
| 8. References.....                                                             | S51 |
| 9. NMR Spectra .....                                                           | S52 |

## 1. General Information

Unless specified, all metal complexes, reagents, and starting materials were purchased from commercial sources and used as received. Metal salts were stored in a nitrogen atmosphere dry box. Acetonitrile, methanol, toluene, THF, Et<sub>2</sub>O, and CH<sub>2</sub>Cl<sub>2</sub> were dried by filtration through alumina according to the procedure of Grubbs.<sup>[S1]</sup> Analytical thin layer chromatography was performed on 0.25 mm extra hard silica gel plates with UV254 fluorescent indicator. <sup>1</sup>H NMR and <sup>13</sup>C NMR spectra were recorded at ambient temperature using Bruker Avance III 500MHz NMR spectrometer. The data are reported as follows: chemical shift in ppm from internal tetramethylsilane on the  $\delta$  scale, multiplicity (br = broad, s = singlet, d = doublet, t = triplet, q = quartet, m = multiplet), coupling constants (Hz) and integrations. High-resolution mass spectra (HRMS) were recorded with a Waters Micromass GCT Premier using an Agilent 1290 with electrospray ionization (ESI) technique.

## 2. Optimization of the Reaction Conditions

Table S1. Optimization of the reaction conditions

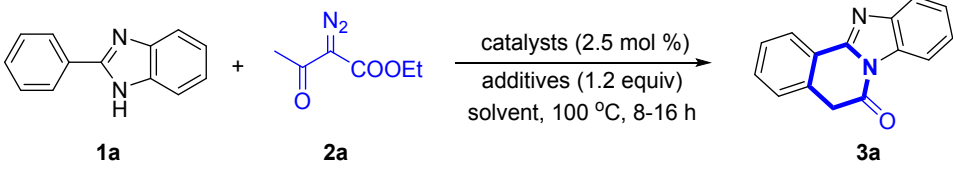

| entry              | catalysts                               | additives | solvent | yield (%) <sup>b</sup>     |
|--------------------|-----------------------------------------|-----------|---------|----------------------------|
| 1                  | [Cp*RhCl <sub>2</sub> ] <sub>2</sub>    | -         | DCE     | 0                          |
| 2                  | [Cp*RhCl <sub>2</sub> ] <sub>2</sub>    | -         | Toluene | 0                          |
| 3                  | [Cp*RhCl <sub>2</sub> ] <sub>2</sub>    | -         | EtOH    | trace                      |
| 4                  | [Cp*RhCl <sub>2</sub> ] <sub>2</sub>    | -         | TFE     | 20                         |
| 5                  | [Cp*RhCl <sub>2</sub> ] <sub>2</sub>    | NaOAc     | TFE     | 46                         |
| 6                  | [Cp*RhCl <sub>2</sub> ] <sub>2</sub>    | CsOAc     | TFE     | 22                         |
| 7                  | [Cp*RhCl <sub>2</sub> ] <sub>2</sub>    | KOAc      | TFE     | 54                         |
| 8                  | [Cp*RhCl <sub>2</sub> ] <sub>2</sub>    | HOAc      | TFE     | 0                          |
| 9 <sup>c</sup>     | [Cp*RhCl <sub>2</sub> ] <sub>2</sub>    | KOAc      | TFE     | 88                         |
| 10 <sup>c, d</sup> | [Cp*RhCl <sub>2</sub> ] <sub>2</sub>    | KOAc      | TFE     | <b>99 (90)<sup>e</sup></b> |
| 11 <sup>c, d</sup> | [Ru( <i>p</i> -cymene)Cl <sub>2</sub> ] | KOAc      | TFE     | 55                         |
| 12 <sup>c, d</sup> | [Cp*IrCl <sub>2</sub> ] <sub>2</sub>    | KOAc      | TFE     | 0                          |
| 13 <sup>c, d</sup> | [Cp*Co(CO)I <sub>2</sub> ]              | KOAc      | TFE     | 0                          |

<sup>a</sup>Reaction conditions: **1a** (0.2 mmol), **2a** (0.24 mmol) in solvent (1.0 mL) at 100 °C for 8 h. <sup>b</sup>GC yields use *n*-Dodecane as an internal standard. <sup>c</sup>20 mol% KOAc was used for 16 h (entries 9-13).

<sup>d</sup>1.5 mL TFE was used. <sup>e</sup>Isolated yield. TFE = 2,2,2-Trifluoroethanol.

### 3. General Procedure for Cp\*Rh<sup>III</sup>-Catalyzed [4+2] Annulation

#### 3.1 Synthesis of Imidazo[2,1-*a*]isoquinolin-6(5*H*)-ones by [Cp\*RhCl<sub>2</sub>]<sub>2</sub>/KOAc System

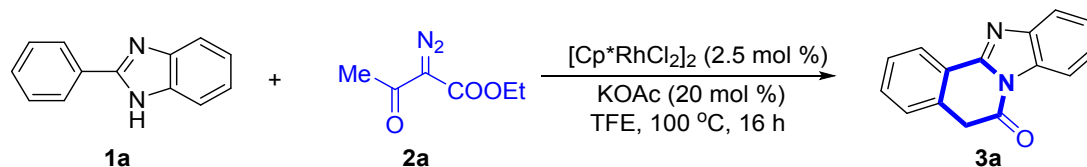

A 25 mL round bottom Schlenk flask equipped with a magnetic stirring bar was charged with **1a** (38.8 mg, 0.2 mmol), ethyl 2-diazo-3-oxobutanoate **2a** (37.4 mg, 0.24 mmol), [Cp\*RhCl<sub>2</sub>]<sub>2</sub> (3.1 mg, 0.005 mmol), KOAc (3.9 mg, 0.04 mmol), and TFE (1.5 mL). The reaction mixture was stirred at 100 °C under nitrogen atmosphere for 16 h. After the reaction was completed, the solvent was evaporated and the organic product purified by column chromatography (petroleum ether/EtOAc: 10/1), giving the expected product **3a** (42.1 mg, 90%) as a yellow solid.

#### 3.2 Synthesis of 5,6-Dihydroimidazo[2,1-*a*]isoquinolin-5-ols by [Cp\*RhCl<sub>2</sub>]<sub>2</sub>/KOAc System

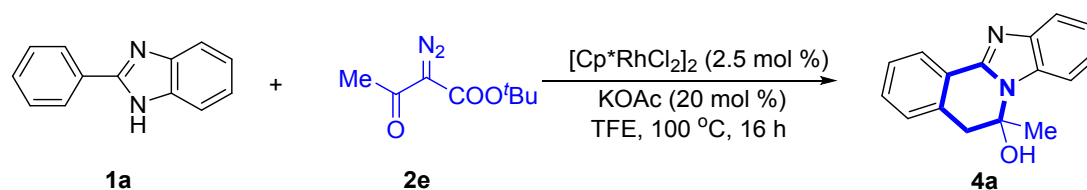

A 25 mL round bottom Schlenk flask equipped with a magnetic stirring bar was charged with **1a** (38.8 mg, 0.2 mmol), *tert*-butyl 2-diazo-3-oxobutanoate **2e** (44.1 mg, 0.24 mmol), [Cp\*RhCl<sub>2</sub>]<sub>2</sub> (3.1 mg, 0.005 mmol), KOAc (3.9 mg, 0.04 mmol), and TFE (1.5 mL). The reaction mixture was stirred at 100 °C under nitrogen atmosphere for 16 h. After the reaction was completed, the solvent was evaporated and the organic product purified by column chromatography (petroleum ether/EtOAc: 5/1), giving the expected product **4a** (36.0 mg, 72%) as a white solid.

#### 3.3 Synthesis of Imidazo[2,1-*a*]isoquinolines by [Cp\*RhCl<sub>2</sub>]<sub>2</sub>/HOAc System

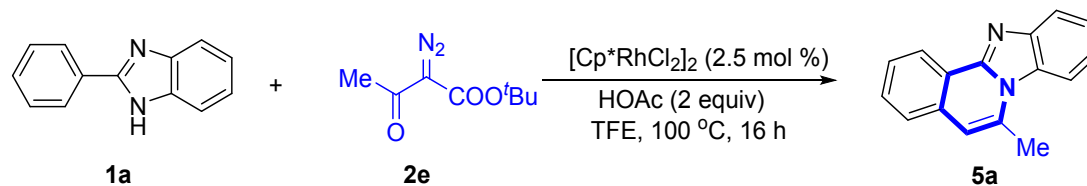

A 25 mL round bottom Schlenk flask equipped with a magnetic stirring bar was charged with **1a** (38.8 mg, 0.2 mmol), *tert*-butyl 2-diazo-3-oxobutanoate **2e** (44.1 mg, 0.24 mmol),  $[\text{Cp}^*\text{RhCl}_2]_2$  (3.1 mg, 0.005 mmol), HOAc (24  $\mu\text{L}$ , 0.4 mmol), and TFE (1.5 mL). The reaction mixture was stirred at 100 °C under nitrogen atmosphere for 16 h. After the reaction was completed, the solvent was evaporated and the organic product purified by column chromatography (petroleum ether/EtOAc: 15/1), giving the expected product **5a** (45.9 mg, 99%) as a yellow solid.

### 3.4 Synthesis of Isopropyl 5-hydroxy-imidazo[2,1-*a*]isoquinoline-6-carboxylates by $[\text{Cp}^*\text{RhCl}_2]_2/\text{KOAc}$ System

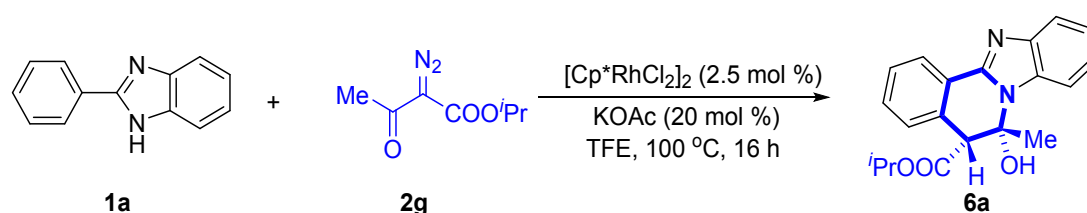

A 25 mL round bottom Schlenk flask equipped with a magnetic stirring bar was charged with **1a** (38.8 mg, 0.2 mmol), isopropyl 2-diazo-3-oxobutanoate **2g** (40.8 mg, 0.24 mmol),  $[\text{Cp}^*\text{RhCl}_2]_2$  (3.1 mg, 0.005 mmol), KOAc (3.9 mg, 0.04 mmol), and TFE (1.5 mL). The reaction mixture was stirred at 100 °C under nitrogen atmosphere for 16 h. After the reaction was completed, the solvent was evaporated and the organic product purified by column chromatography (petroleum ether/EtOAc: 5/1), giving the expected product **6a** (61.8 mg, 92%) as a white solid.

### 3.5 Synthesis of Isopropyl imidazo[2,1-*a*]isoquinoline-6-carboxylates by $[\text{Cp}^*\text{RhCl}_2]_2/\text{HOAc}$ System

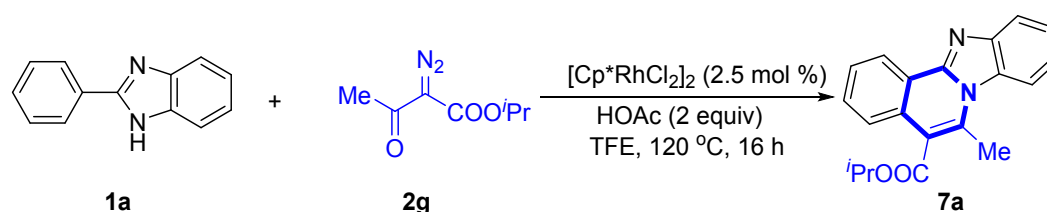

A 25 mL round bottom Schlenk flask equipped with a magnetic stirring bar was charged with **1a** (38.8 mg, 0.2 mmol), isopropyl 2-diazo-3-oxobutanoate **2g** (40.8 mg, 0.24 mmol),  $[\text{Cp}^*\text{RhCl}_2]_2$  (3.1 mg, 0.005 mmol), KOAc (3.9 mg, 0.04 mmol), and TFE (1.5 mL). The reaction mixture was stirred at 100 °C under nitrogen atmosphere for 16 h. After the reaction was completed, the solvent was evaporated and the

organic product purified by column chromatography (petroleum ether/EtOAc: 5/1), giving the expected product **7a** (31.8 mg, 50%) as a yellow solid.

## 4. Synthetic Applications

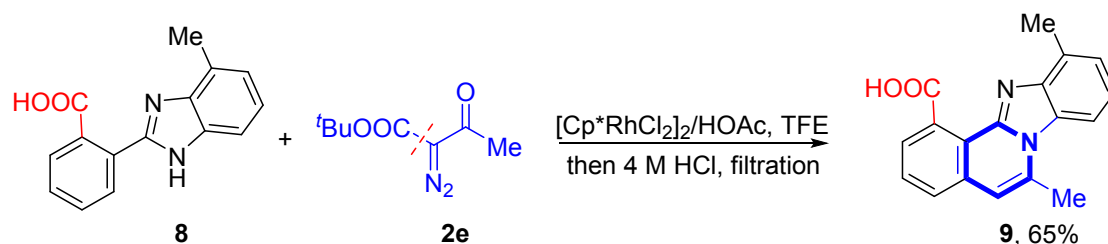

A 100 mL round bottom Schlenk flask equipped with a magnetic stirring bar was charged with **8** (252 mg, 1.0 mmol), *tert*-butyl 2-diazo-3-oxobutanoate **2e** (220.5 mg, 1.2 mmol),  $[\text{Cp}^*\text{RhCl}_2]_2$  (15.5 mg, 0.025 mmol), HOAc (120  $\mu\text{L}$ , 2 mmol), and TFE (7.5 mL). The reaction mixture was stirred at 100  $^\circ\text{C}$  under nitrogen atmosphere for 16 h. After the reaction was completed, 4 M HCl in MeOH (0.5 mL) was added. After further stirring at 100  $^\circ\text{C}$  for 1 h, the reaction came to end and solid was precipitated out as the desired product. The precipitate was collected by filtration and washed by petroleum ether, and then kept in desiccator under vacuum to afford the **6,11-dimethylbenzo[4,5]imidazo[2,1-*a*]isoquinoline-1-carboxylic acid 9** (188.5 mg, 65%) as a gray solid, m. p. = 117–118;  $^1\text{H}$  NMR (500 MHz,  $\text{CF}_3\text{COOD}$ )  $\delta$  9.11 (d,  $J = 7.5$  Hz, 1H), 8.42 (d,  $J = 7.1$  Hz, 2H), 8.19 (t,  $J = 7.7$  Hz, 1H), 7.78 (d,  $J = 3.5$  Hz, 2H), 7.69 (s, 1H), 3.39 (s, 3H), 2.89 (s, 3H);  $^{13}\text{C}$  NMR (126 MHz,  $\text{CF}_3\text{COOD}$ )  $\delta$  174.4, 143.1, 139.5, 139.3, 138.4, 137.0, 134.9, 132.0, 131.9, 130.7, 129.0, 127.4, 127.2, 119.7, 116.9, 115.7, 20.0, 16.7. HRMS (ESI) calcd for  $\text{C}_{18}\text{H}_{15}\text{N}_2\text{O}_2^+$   $[\text{M} + \text{H}]^+$  : 291.1128; Found: 291.1123.

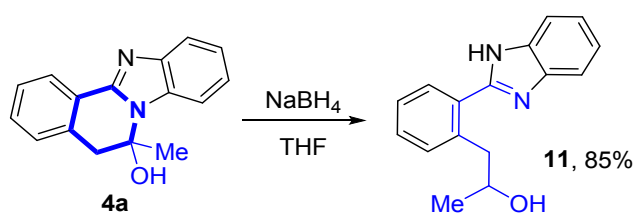

A 50 mL round bottom Schlenk flask equipped with a magnetic stirring bar was charged with **4a** (250 mg, 1 mmol), Sodium borohydride (76 mg, 2 mmol), and THF (10 mL). The reaction mixture was stirred at room temperature for 3 h. After the reaction was completed, the solvent was evaporated and the organic product purified by column chromatography (petroleum ether/EtOAc: 1/1), giving the **1-(2-(1H-benzo[*d*]imidazol-2-yl)phenyl)propan-2-ol 11** (214 mg, 85%) as a white solid, m. p. = 193–194;  $^1\text{H}$  NMR (500 MHz, DMSO)  $\delta$  7.77–7.72 (m, 1H), 7.65 (dt,  $J = 6.6, 3.3$  Hz, 2H), 7.54–7.46 (m, 2H), 7.46–7.40 (m, 1H), 7.31–7.25 (m, 2H), 3.95–3.85 (m,

1H), 3.07 (ddd,  $J = 21.0, 13.3, 6.2$  Hz, 2H), 1.12 (d,  $J = 6.2$  Hz, 3H);  $^{13}\text{C}$  NMR (126 MHz, DMSO)  $\delta$  153.0, 140.0, 132.6, 131.0, 130.6, 130.4, 127.2, 126.4, 123.2, 116.0, 68.7, 43.0, 25.0; HRMS (ESI) calcd for  $\text{C}_{16}\text{H}_{17}\text{N}_2\text{O}^+$   $[\text{M} + \text{H}]^+$ : 253.1335; Found: 253.1338.

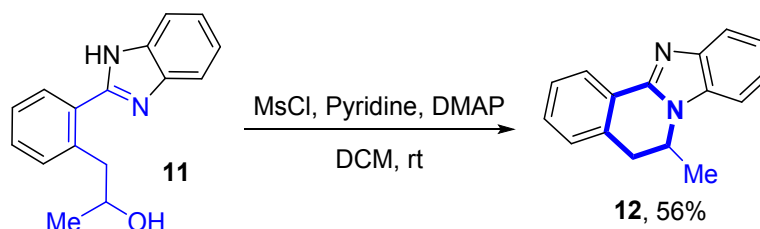

A 25 mL round bottom Schlenk flask equipped with a magnetic stirring bar was charged with **11** (50.4, 0.5 mmol), MsCl (286 mg, 2.5 mmol), Pyridine (198 mg, 5 mmol), DMAP (30.5 mg, 0.25 mmol) and DCM (5 mL). The reaction mixture was stirred at room temperature for 12 h. After the reaction was completed, the solvent was evaporated and the organic product purified by column chromatography (petroleum ether/EtOAc: 3/1), giving the **6-methyl-5,6-dihydrobenzo[4,5]imidazo[2,1-a]isoquinoline 12** (65.5 mg, 56%) as a white solid, m. p. = 100–101;  $^1\text{H}$  NMR (500 MHz,  $\text{CDCl}_3$ )  $\delta$  8.31 (dd,  $J = 5.7, 3.2$  Hz, 1H), 7.88–7.80 (m, 1H), 7.45–7.36 (m, 3H), 7.34–7.27 (m, 3H), 4.94–4.82 (m, 1H), 3.58 (dd,  $J = 15.7, 6.6$  Hz, 1H), 2.98 (d,  $J = 15.1$  Hz, 1H), 1.33 (d,  $J = 6.7$  Hz, 3H);  $^{13}\text{C}$  NMR (126 MHz,  $\text{CDCl}_3$ )  $\delta$  147.9, 143.7, 133.6, 132.6, 130.4, 129.0, 127.7, 125.9, 125.6, 122.7, 122.5, 119.7, 109.0, 47.4, 34.7, 19.4; HRMS (ESI) calcd for  $\text{C}_{16}\text{H}_{15}\text{N}_2^+$   $[\text{M} + \text{H}]^+$ : 235.1230; Found: 235.1232.

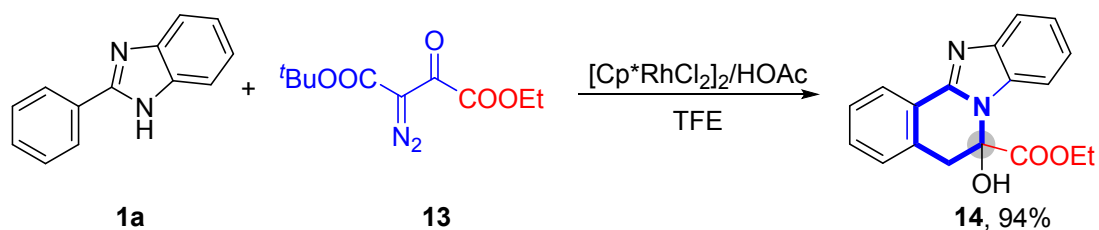

A 100 mL round bottom Schlenk flask equipped with a magnetic stirring bar was charged with **1a** (194 mg, 1.0 mmol), **13** (290 mg, 1.2 mmol),  $[\text{Cp}^*\text{RhCl}_2]_2$  (15.5 mg, 0.025 mmol), HOAc (120  $\mu\text{L}$ , 2 mmol), and TFE (7.5 mL). The reaction mixture was stirred at 100  $^\circ\text{C}$  under nitrogen atmosphere for 16 h. After the reaction was completed, the solvent was evaporated and the organic product purified by column chromatography (petroleum ether/EtOAc: 5/1), giving the **ethyl 6-hydroxy-5,6-dihydrobenzo[4,5]imidazo[2,1-a]isoquinoline-6-carboxylate 14** (31.8 mg, 94%) as a white solid, m. p. = 120–114;  $^1\text{H}$  NMR (500 MHz, DMSO)  $\delta$  8.24–8.16 (m, 1H), 8.14 (s, 1H), 7.73 (d,  $J = 5.6$  Hz, 2H), 7.52–7.41 (m, 3H), 7.31–7.22 (m, 2H), 4.18–



4.02 (m, 2H), 3.68 (dd,  $J = 65.7, 16.1$  Hz, 2H), 1.03 (t,  $J = 7.0$  Hz, 3H);  $^{13}\text{C}$  NMR (126 MHz, DMSO)  $\delta$  170.0, 149.7, 144.6, 134.8, 133.1, 131.3, 129.3, 128.7, 126.2, 125.8, 123.7, 123.3, 120.1, 114.0, 86.6, 62.9, 14.7; HRMS (ESI) calcd for  $\text{C}_{18}\text{H}_{17}\text{N}_2\text{O}_3^+$   $[\text{M} + \text{H}]^+$ : 309.1234; Found: 309.1233.

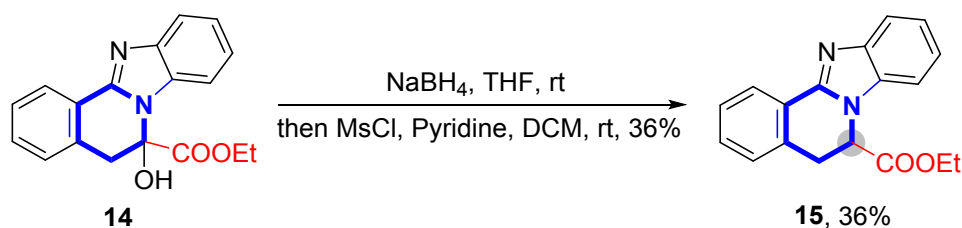

A 25 mL round bottom Schlenk flask equipped with a magnetic stirring bar was charged with **14** (154 mg, 0.5 mmol), Sodium borohydride (9.5 mg, 0.25 mmol), and THF (4 mL). The reaction mixture was stirred at room temperature for 3 h. After the reaction was completed, the solvent was evaporated and the MsCl (286 mg, 2.5 mmol), Pyridine (198 mg, 5 mmol), DMAP (30.5 mg, 0.25 mmol) and DCM (5 mL) were added. The reaction mixture was stirred at room temperature for 12 h. After the reaction was completed, the solvent was evaporated and the organic product purified by column chromatography (petroleum ether/EtOAc: 5/1), giving the **ethyl 5,6-dihydrobenzo[4,5]imidazo[2,1-*a*]isoquinoline-6-carboxylate 15** (52.6 mg, 36%) as slight yellow oil.  $^1\text{H}$  NMR (500 MHz,  $\text{CDCl}_3$ )  $\delta$  8.31 (d,  $J = 7.2$  Hz, 1H), 7.85 (dd,  $J = 5.4, 2.6$  Hz, 1H), 7.47–7.35 (m, 2H), 7.35–7.27 (m, 4H), 5.27 (d,  $J = 5.9$  Hz, 1H), 4.02 (q,  $J = 7.1$  Hz, 2H), 3.63 (dt,  $J = 36.6, 11.3$  Hz, 2H), 1.01 (t,  $J = 7.1$  Hz, 3H);  $^{13}\text{C}$  NMR (126 MHz,  $\text{CDCl}_3$ )  $\delta$  169.1, 148.6, 143.6, 134.5, 131.5, 130.4, 128.2, 128.1, 126.1, 125.7, 123.1, 122.9, 119.9, 108.9, 62.0, 53.4, 31.4, 13.9; HRMS (ESI) calcd for  $\text{C}_{18}\text{H}_{17}\text{N}_2\text{O}_2^+$   $[\text{M} + \text{H}]^+$ : 293.1285; Found: 293.1287.

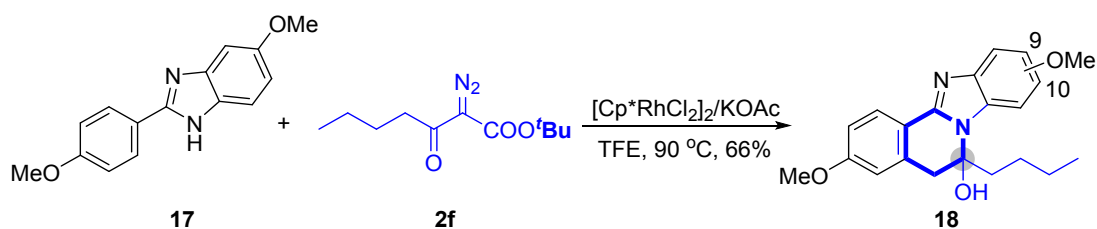

A 100 mL round bottom Schlenk flask equipped with a magnetic stirring bar was charged with **17** (254 mg, 1.0 mmol), **2f** (271 mg, 1.2 mmol),  $[\text{Cp}^*\text{RhCl}_2]_2$  (15.5 mg, 0.025 mmol), HOAc (120  $\mu\text{L}$ , 2 mmol), and TFE (7.5 mL). The reaction mixture was stirred at 90  $^\circ\text{C}$  under nitrogen atmosphere for 12 h. After the reaction was completed,

the solvent was evaporated and the organic product purified by column chromatography (petroleum ether/EtOAc: 2/1), giving the mixture **18** (232 mg, 66%) as a yellow oil.  $^1\text{H NMR}$  (500 MHz,  $\text{CDCl}_3$ )  $\delta$  7.85 (d,  $J = 8.5$  Hz, 1H), 7.75 (t,  $J = 8.4$  Hz, 2H), 7.36 (dd,  $J = 23.6, 5.3$  Hz, 6.81 (d,  $J = 1.5$  Hz), 6.70 (td,  $J = 9.1, 2.1$  Hz), 6.57–6.42 (m), 3.76 (s), 3.74 (s), 3.73 (s), 3.64 (s), 3.27 (dd,  $J = 99.4, 15.6$  Hz), 1.28–1.19 (m), 1.18–1.04 (m), 0.73 (t,  $J = 6.7$  Hz);  $^{13}\text{C NMR}$  (126 MHz,  $\text{CDCl}_3$ )  $\delta$  161.0, 160.8, 156.0, 148.6, 148.1, 143.4, 137.4, 135.4, 135.0, 134.1, 127.9, 126.9, 126.7, 118.4, 118.0, 117.7, 114.2, 113.3, 112.7, 112.6, 112.4, 111.5, 99.9, 97.5, 88.9, 82.5, 60.5, 55.8, 55.3, 55.2, 42.1, 39.1, 39.0, 31.6, 26.0, 24.7, 22.6, 13.9; **HRMS (ESI) calcd for**  $\text{C}_{21}\text{H}_{25}\text{N}_2\text{O}_3^+$   $[\text{M} + \text{H}]^+$  : 353.1860; Found: 353.1860.

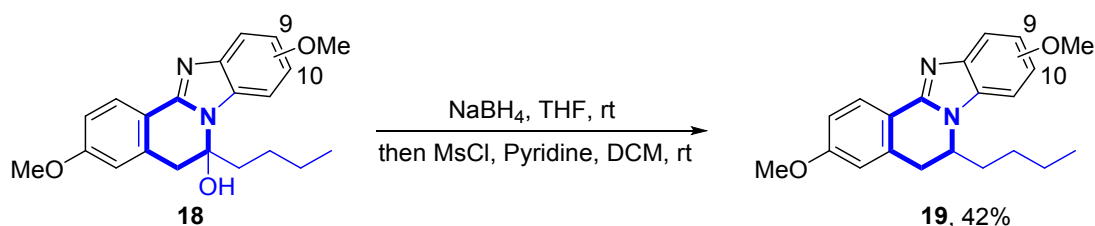

A 25 mL round bottom Schlenk flask equipped with a magnetic stirring bar was charged with **18** (176 mg, 0.5 mmol), Sodium borohydride (38 mg, 1 mmol), and THF (4 mL). The reaction mixture was stirred at room temperature for 3 h. After the reaction was completed, the solvent was evaporated and the MsCl (286 mg, 2.5 mmol), Pyridine (198 mg, 5 mmol), DMAP (30.5 mg, 0.25 mmol) and DCM (5 mL) were added. The reaction mixture was stirred at room temperature for 12 h. After the reaction was completed, the solvent was evaporated and the organic product purified by column chromatography (petroleum ether/EtOAc: 5/1), giving the expected mixture **19** (70.5 mg, 42%, 2:1) as yellow oil. Major isomer was isolated:  $^1\text{H NMR}$  (500 MHz,  $\text{CDCl}_3$ )  $\delta$  7.37 (dd,  $J = 10.4, 4.3$  Hz, 2H), 6.96 (s, 1H), 6.83 (dd,  $J = 8.7, 2.3$  Hz, 1H), 6.73 (d,  $J = 2.5$  Hz, 1H), 6.44 (dd,  $J = 8.5, 2.5$  Hz, 1H), 4.07–3.90 (m, 1H), 3.79 (s, 3H), 3.65 (s, 3H), 3.04 (dd,  $J = 13.7, 9.7$  Hz, 1H), 2.77 (dd,  $J = 13.7, 2.9$  Hz, 1H), 1.68 (qt,  $J = 13.4, 6.8$  Hz, 2H), 1.59–1.32 (m, 3H), 0.93 (t,  $J = 7.2$  Hz, 3H);  $^{13}\text{C NMR}$  (126 MHz,  $\text{CDCl}_3$ )  $\delta$  160.3, 156.2, 151.9, 140.2, 133.2, 131.0, 123.2, 116.6, 115.4, 113.2, 111.9, 111.6, 99.9, 74.1, 55.7, 55.1, 40.1, 38.3, 27.9, 22.9, 14.2; **HRMS (ESI) calcd for**  $\text{C}_{21}\text{H}_{25}\text{N}_2\text{O}_2^+$   $[\text{M} + \text{H}]^+$  : 337.1911; Found: 337.1912.

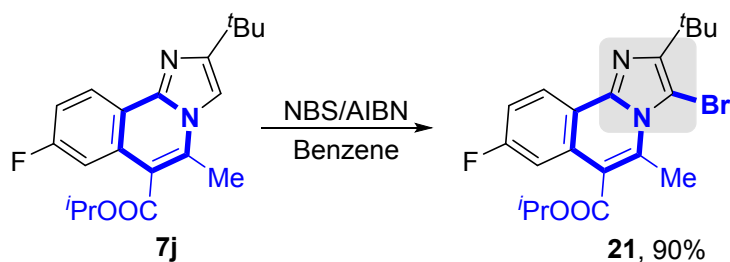

A 25 mL round bottom Schlenk flask equipped with a magnetic stirring bar was charged with **7j** (68.4 mg, 0.2 mmol), NBS (78.3 mg, 0.44 mmol), AIBN (1.6 mg, 0.02 mmol) and Benzene (2.5 mL). The reaction mixture was stirred at 90 °C for 4 h. After the reaction was completed, the solvent was evaporated and the organic product purified by column chromatography (petroleum ether/EtOAc: 20/1), giving the **isopropyl 3-bromo-2-(tert-butyl)-8-fluoro-5-methylimidazo[2,1-*a*]isoquinoline-6-carboxylate **21**** (76 mg, 90%) as a yellow solid, m. p. = 150–152;. <sup>1</sup>H NMR (500 MHz, CDCl<sub>3</sub>) δ 8.62 (dd, *J* = 8.9, 5.7 Hz, 1H), 7.31–7.26 (m, 1H), 7.21 (dd, *J* = 10.1, 2.4 Hz, 1H), 5.41 (dt, *J* = 12.6, 6.3 Hz, 1H), 3.08 (s, 3H), 1.53 (s, 9H), 1.45 (d, *J* = 6.3 Hz, 3H); <sup>13</sup>C NMR (126 MHz, CDCl<sub>3</sub>) δ 167.0, 162.5 (d, *J* = 248.1 Hz), 152.0, 142.0, 134.0, 127.8 (d, *J* = 9.6 Hz), 126.0 (d, *J* = 9.1 Hz), 119.6 (d, *J* = 2.0 Hz), 118.8 (d, *J* = 3.6 Hz), 116.5 (d, *J* = 23.8 Hz), 109.0 (d, *J* = 23.8 Hz), 70.0, 33.4, 29.4, 21.8, 19.7; HRMS (ESI) calcd for C<sub>20</sub>H<sub>23</sub>BrFN<sub>2</sub>O<sub>2</sub><sup>+</sup> [M + H]<sup>+</sup>: 310.1350; Found: 310.1346.

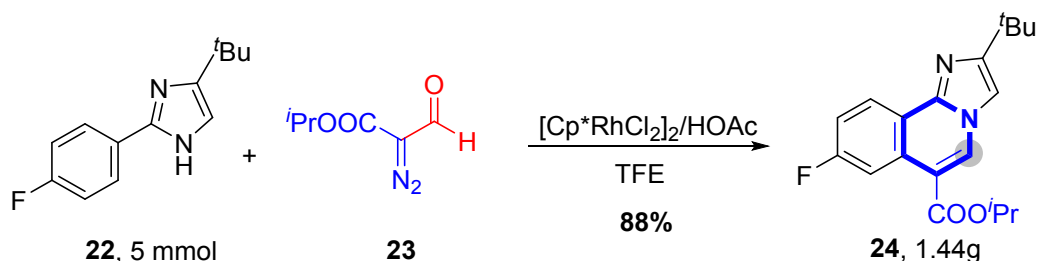

A 100 mL round bottom Schlenk flask equipped with a magnetic stirring bar was charged with **22** (1.09 g, 5.0 mmol), **23** (936 mg, 6 mmol), [Cp\**RhCl*<sub>2</sub>]<sub>2</sub> (77.5 mg, 0.025 mmol), HOAc (600 μL, 2 mmol), and TFE (37.5 mL). The reaction mixture was stirred at 120 °C under nitrogen atmosphere for 16 h. After the reaction was completed, the solvent was evaporated and the organic product purified by column chromatography (petroleum ether/EtOAc: 20/1), giving the **isopropyl 2-(tert-butyl)-8-fluoroimidazo[2,1-*a*]isoquinoline-6-carboxylate **24**** (1.44g, 88%) as a white solid. <sup>1</sup>H NMR (500 MHz, CDCl<sub>3</sub>) δ 8.75 (s, 1H), 8.69–8.60 (m, 2H), 7.35–7.30 (m, 1H), 7.32 (s, 1H), 5.33 (hept, *J* = 6.3 Hz, 1H), 1.43 (d, *J* = 6.3 Hz, 6H), 1.42 (s, 9H); <sup>13</sup>C NMR (126 MHz, CDCl<sub>3</sub>) δ 164.8, 162.7 (d, *J* = 246.6 Hz), 157.1, 143.0, 130.8, 128.8 (d, *J* = 10.4 Hz), 126.1 (d, *J* = 9.1 Hz), 120.0, 116.5 (d, *J* = 23.9 Hz), 112.4 (d, *J* = 3.7 Hz), 111.6 (d, *J* = 25.4 Hz), 108.7, 68.9, 32.4, 30.1, 22.0; HRMS (ESI) calcd for C<sub>19</sub>H<sub>22</sub>FN<sub>2</sub>O<sub>2</sub><sup>+</sup> [M + H]<sup>+</sup>: 329.1660; Found: 329.1664.

## 5. Mechanistic Studies

To shed light on the mechanism of the reaction that generates these unexpected products, we conducted a series of control experiments (Scheme S1). Firstly, treatment of **1a** and ethyl diazoacetate **25** under the standard conditions did not lead to any desired products (Scheme S1, a). Furthermore, when the reaction of **1a** with **2a** or **2e** were carried out at room temperature, the direct 1,2-addition products (**26** and **27**) were both isolated in high yields (Scheme S1, b and c). In addition, exposure of **26** or **27** at 100 °C without Rh-catalyst provided the desired products **3a** and **4a** in high yield, which suggested that the Rh-catalyst only play the role in C-H activation process and the different types of ester group are crucial factors for the formation of diverse products (Scheme S1, d).

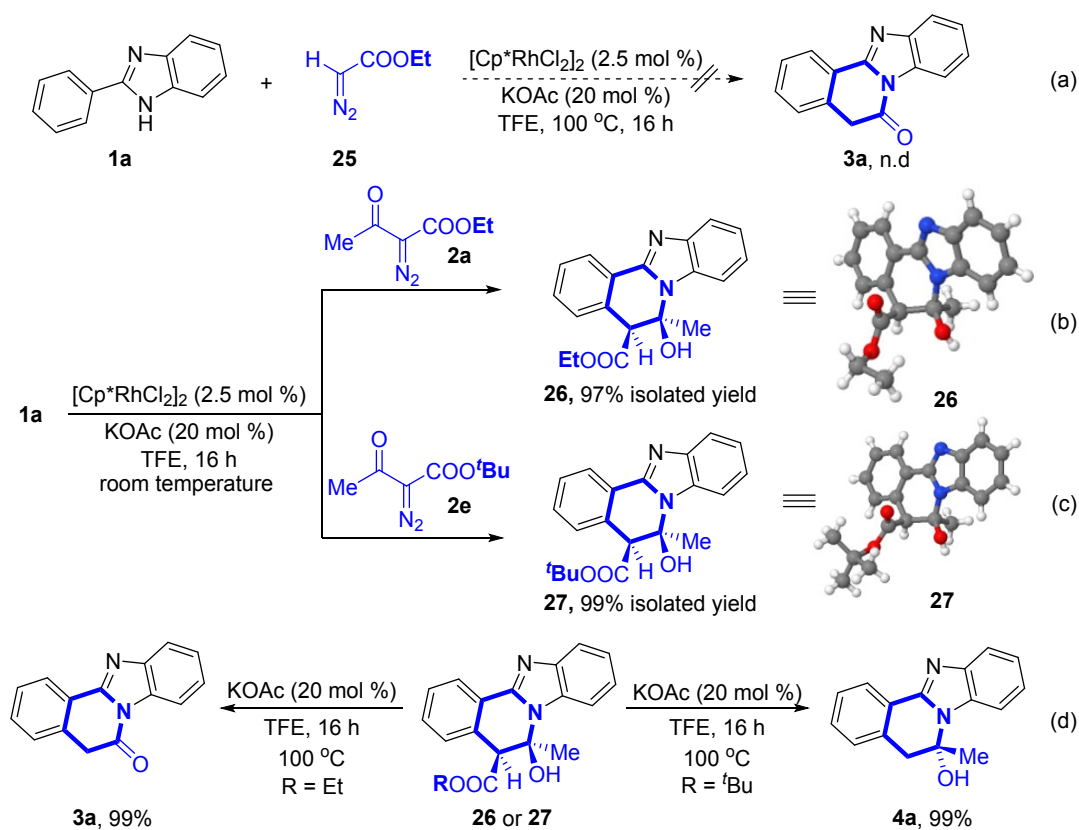

Scheme S1. Mechanistic Studies

## 6. Crystal Structure of Products

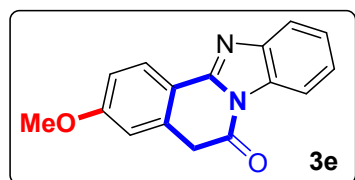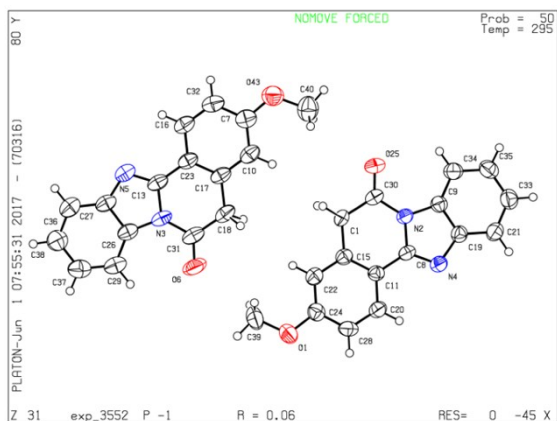

Bond precision: C-C = 0.0042 Å

Wavelength=0.71073

Cell: a=7.0483 (8)

b=12.6910 (13)

c=14.4533 (15)

alpha=103.668 (9)

beta=90.921 (9)

gamma=102.650 (9)

Temperature: 295 K

|                        | Calculated    | Reported      |
|------------------------|---------------|---------------|
| Volume                 | 1222.6 (2)    | 1222.6 (2)    |
| Space group            | P -1          | P -1          |
| Hall group             | -P 1          | -P 1          |
| Moiety formula         | C16 H12 N2 O2 | C16 H12 N2 O2 |
| Sum formula            | C16 H12 N2 O2 | C16 H12 N2 O2 |
| Mr                     | 264.28        | 264.29        |
| Dx, g cm <sup>-3</sup> | 1.436         | 1.436         |
| Z                      | 4             | 4             |
| Mu (mm <sup>-1</sup> ) | 0.097         | 0.097         |
| F000                   | 552.0         | 552.3         |
| F000'                  | 552.24        |               |
| h, k, lmax             | 8, 15, 17     | 8, 15, 17     |
| Nref                   | 4298          | 4294          |
| Tmin, Tmax             |               |               |
| Tmin'                  |               |               |

Correction method= Not given

Data completeness= 0.999

Theta(max)= 25.000

R(reflections)= 0.0624 ( 2521)

wR2(reflections)= 0.1270 ( 4294)

S = 1.054

Npar= 379

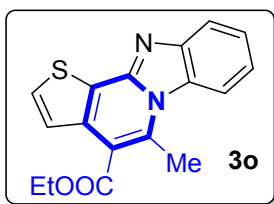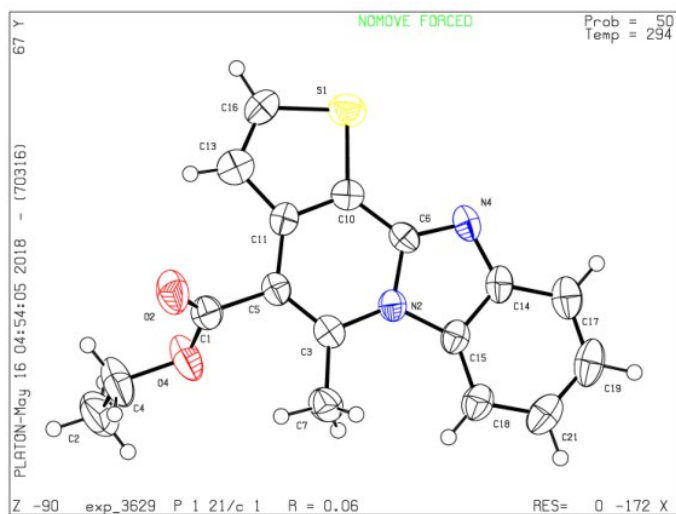

Bond precision: C-C = 0.0051 Å

Wavelength=0.71073

Cell: a=7.1819(13)  
alpha=90

b=12.909(3)  
beta=99.316(18)

c=16.108(3)  
gamma=90

Temperature: 294 K

|                        | Calculated      | Reported        |
|------------------------|-----------------|-----------------|
| Volume                 | 1473.7(5)       | 1473.7(5)       |
| Space group            | P 21/c          | P 21/c 1        |
| Hall group             | -P 2ybc         | -P 2ybc         |
| Moiety formula         | C17 H14 N2 O2 S | C17 H14 N2 O2 S |
| Sum formula            | C17 H14 N2 O2 S | C17 H14 N2 O2 S |
| Mr                     | 310.36          | 310.38          |
| Dx, g cm <sup>-3</sup> | 1.399           | 1.399           |
| Z                      | 4               | 4               |
| Mu (mm <sup>-1</sup> ) | 0.228           | 0.228           |
| F000                   | 648.0           | 648.8           |
| F000'                  | 648.75          |                 |
| h, k, lmax             | 8, 15, 19       | 8, 15, 19       |
| Nref                   | 2601            | 2600            |
| Tmin, Tmax             |                 |                 |
| Tmin'                  |                 |                 |

Correction method= Not given

Data completeness= 1.000

Theta(max)= 25.000

R(reflections)= 0.0643( 1572)

wR2(reflections)= 0.1486( 2600)

S = 1.002

Npar= 201

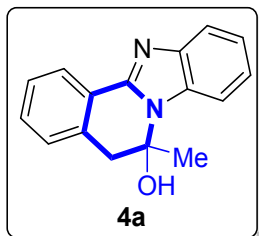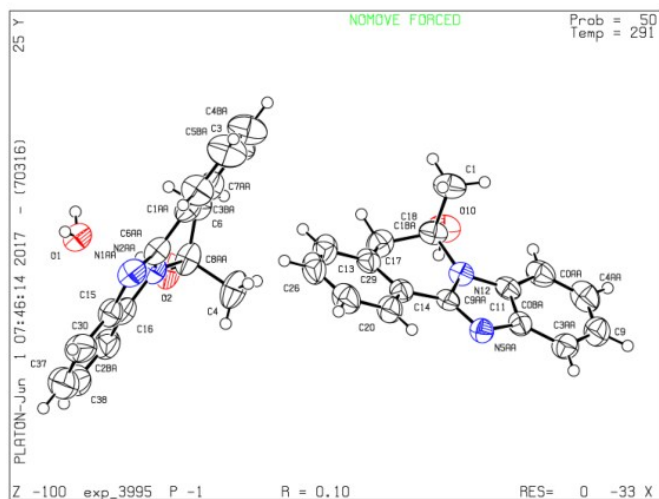

Bond precision: C-C = 0.0081 Å

Wavelength=0.71073

Cell: a=10.711(3) b=11.136(2) c=13.512(3)  
 alpha=100.641(16) beta=104.19(2) gamma=113.52(2)  
 Temperature: 291 K

|                        | Calculated            | Reported              |
|------------------------|-----------------------|-----------------------|
| Volume                 | 1358.4(7)             | 1358.4(6)             |
| Space group            | P -1                  | P -1                  |
| Hall group             | -P 1                  | -P 1                  |
| Moiety formula         | 2(C16 H14 N2 O), H2 O | 2(C16 H14 N2 O), H2 O |
| Sum formula            | C32 H30 N4 O3         | C32 H30 N4 O3         |
| Mr                     | 518.60                | 518.62                |
| Dx, g cm <sup>-3</sup> | 1.268                 | 1.268                 |
| Z                      | 2                     | 2                     |
| Mu (mm <sup>-1</sup> ) | 0.083                 | 0.083                 |
| F000                   | 548.0                 | 548.2                 |
| F000'                  | 548.22                |                       |
| h, k, lmax             | 12, 13, 16            | 12, 13, 16            |
| Nref                   | 4787                  | 4779                  |
| Tmin, Tmax             |                       |                       |
| Tmin'                  |                       |                       |

Correction method= Not given

Data completeness= 0.998

Theta(max)= 24.990

R(reflections)= 0.0960( 2716)

wR2(reflections)= 0.1936( 4779)

S = 1.111

Npar= 359

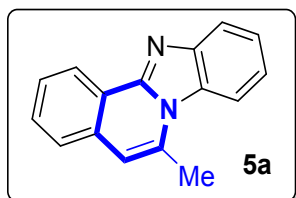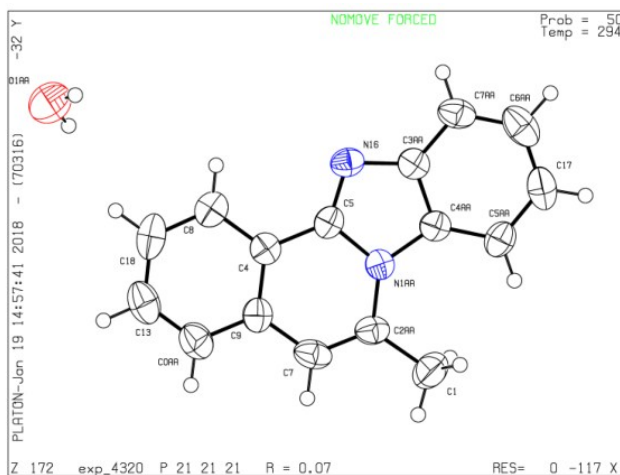

Bond precision: C-C = 0.0063 Å

Wavelength=0.71073

Cell: a=5.7290 (15)  
alpha=90

b=14.295 (5)  
beta=90

c=15.456 (4)  
gamma=90

Temperature: 294 K

|                        | Calculated       | Reported         |
|------------------------|------------------|------------------|
| Volume                 | 1265.8 (6)       | 1265.9 (6)       |
| Space group            | P 21 21 21       | P 21 21 21       |
| Hall group             | P 2ac 2ab        | P 2ac 2ab        |
| Moiety formula         | C16 H12 N2, H2 O | C16 H12 N2, H2 O |
| Sum formula            | C16 H14 N2 O     | C16 H14 N2 O     |
| Mr                     | 250.29           | 250.30           |
| Dx, g cm <sup>-3</sup> | 1.313            | 1.313            |
| Z                      | 4                | 4                |
| Mu (mm <sup>-1</sup> ) | 0.084            | 0.084            |
| F000                   | 528.0            | 528.2            |
| F000'                  | 528.20           |                  |
| h, k, lmax             | 6, 17, 18        | 6, 16, 18        |
| Nref                   | 2228 [ 1320]     | 2039             |
| Tmin, Tmax             |                  |                  |
| Tmin'                  |                  |                  |

Correction method= Not given

Data completeness= 1.54/0.92

Theta (max)= 25.000

R(reflections)= 0.0744 ( 1289)

wR2(reflections)= 0.1071 ( 2039)

S = 1.059

Npar= 176



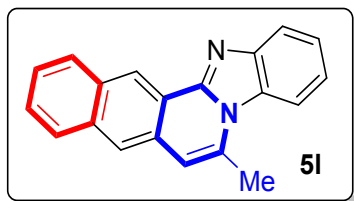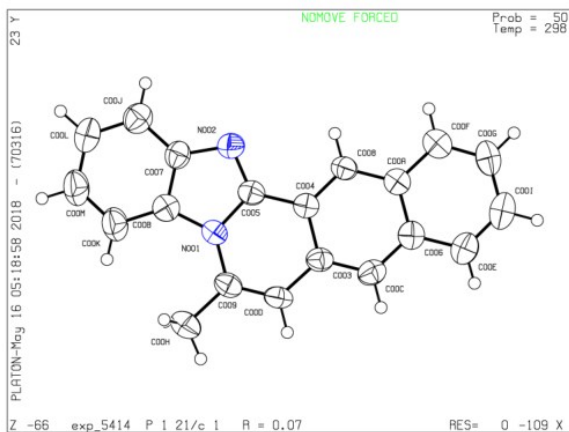

Bond precision: C-C = 0.0045 Å

Wavelength=0.71073

Cell: a=7.0181(4)

b=7.9004(5)

c=25.5706(16)

alpha=90

beta=92.661(6)

gamma=90

Temperature: 298 K

|                        | Calculated  | Reported     |
|------------------------|-------------|--------------|
| Volume                 | 1416.25(15) | 1416.25(15)  |
| Space group            | P 21/c      | P 1 21/c 1   |
| Hall group             | -P 2ybc     | -P 2ybc      |
| Moiety formula         | C20 H14 N2  | C20 H14 N2   |
| Sum formula            | C20 H14 N2  | C20 H14 N2   |
| Mr                     | 282.33      | 282.35       |
| Dx, g cm <sup>-3</sup> | 1.324       | 1.324        |
| Z                      | 4           | 4            |
| Mu (mm <sup>-1</sup> ) | 0.078       | 0.078        |
| F000                   | 592.0       | 592.2        |
| F000'                  | 592.20      |              |
| h, k, lmax             | 8, 9, 30    | 8, 9, 30     |
| Nref                   | 2508        | 2485         |
| Tmin, Tmax             |             | 0.501, 1.000 |
| Tmin'                  |             |              |

Correction method= # Reported T Limits: Tmin=0.501 Tmax=1.000

AbsCorr = MULTI-SCAN

Data completeness= 0.991

Theta(max)= 25.000

R(reflections)= 0.0701( 1323)

wR2(reflections)= 0.2151( 2485)

S = 0.962

Npar= 200

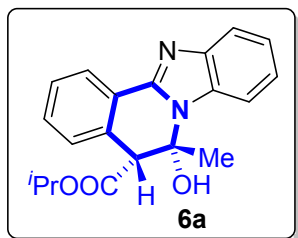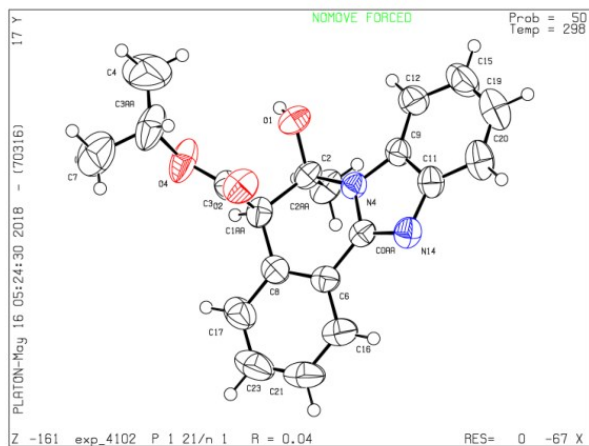

Bond precision: C-C = 0.0033 Å

Wavelength=0.71073

Cell: a=9.8482 (6) b=12.1953 (6) c=15.5327 (10)

alpha=90

beta=106.980 (7)

gamma=90

Temperature: 298 K

|                        | Calculated    | Reported      |
|------------------------|---------------|---------------|
| Volume                 | 1784.18 (19)  | 1784.18 (18)  |
| Space group            | P 21/n        | P 1 21/n 1    |
| Hall group             | -P 2yn        | -P 2ybc (x-   |
| Moiety formula         | C20 H20 N2 O3 | C20 H20 N2 O3 |
| Sum formula            | C20 H20 N2 O3 | C20 H20 N2 O3 |
| Mr                     | 336.38        | 336.39        |
| Dx, g cm <sup>-3</sup> | 1.252         | 1.252         |
| Z                      | 4             | 4             |
| Mu (mm <sup>-1</sup> ) | 0.085         | 0.085         |
| F000                   | 712.0         | 712.4         |
| F000'                  | 712.32        |               |
| h, k, lmax             | 11, 14, 18    | 11, 14, 18    |
| Nref                   | 3152          | 3147          |
| Tmin, Tmax             |               |               |
| Tmin'                  |               |               |

Correction method= Not given

Data completeness= 0.998

Theta(max)= 25.000

R(reflections)= 0.0445 ( 2422)

wR2(reflections)= 0.1153 ( 3147)

S = 1.069

Npar= 230

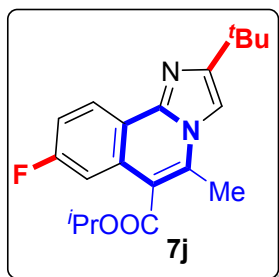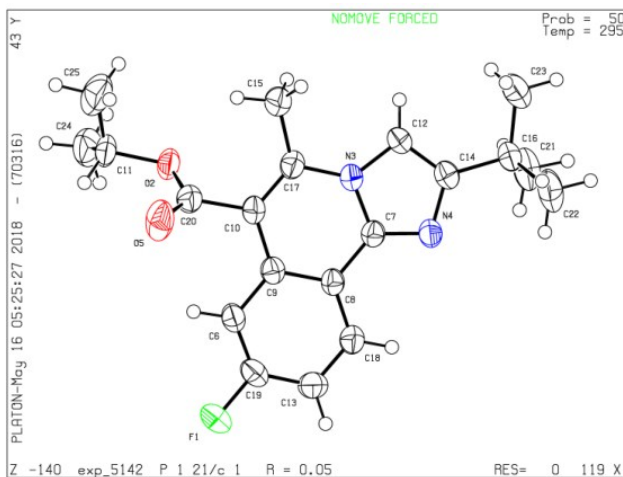

Bond precision: C-C = 0.0031 Å

Wavelength=0.71073

Cell: a=11.9347 (6) b=13.0246 (5) c=12.4263 (6)  
alpha=90 beta=112.805 (5) gamma=90

Temperature: 295 K

|                        | Calculated      | Reported        |
|------------------------|-----------------|-----------------|
| Volume                 | 1780.61 (16)    | 1780.61 (15)    |
| Space group            | P 21/c          | P 1 21/c 1      |
| Hall group             | -P 2ybc         | -P 2ybc         |
| Moiety formula         | C20 H23 F N2 O2 | C20 H23 F N2 O2 |
| Sum formula            | C20 H23 F N2 O2 | C20 H23 F N2 O2 |
| Mr                     | 342.40          | 342.42          |
| Dx, g cm <sup>-3</sup> | 1.277           | 1.277           |
| Z                      | 4               | 4               |
| Mu (mm <sup>-1</sup> ) | 0.090           | 0.090           |
| F000                   | 728.0           | 728.4           |
| F000'                  | 728.35          |                 |
| h, k, lmax             | 14, 15, 14      | 14, 15, 14      |
| Nref                   | 3137            | 3129            |
| Tmin, Tmax             |                 | 0.766, 1.000    |
| Tmin'                  |                 |                 |

Correction method= # Reported T Limits: Tmin=0.766 Tmax=1.000  
AbsCorr = MULTI-SCAN

Data completeness= 0.997 Theta (max)= 25.000

R(reflections)= 0.0494 ( 2174) wR2(reflections)= 0.1239 ( 3129)

S = 1.053 Npar= 231

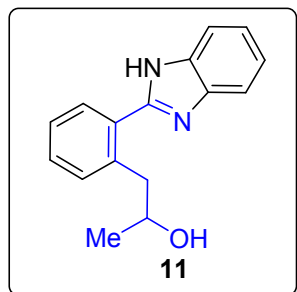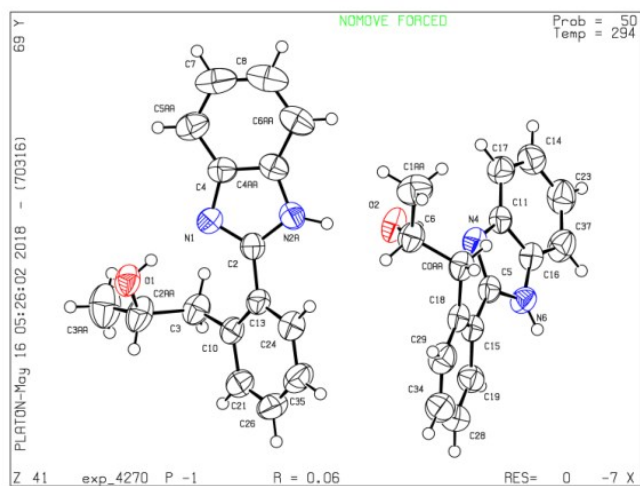

Bond precision: C-C = 0.0040 Å

Wavelength=0.71073

Cell: a=11.1136(8) b=11.2993(9) c=12.7113(6)  
 alpha=105.175(5) beta=101.292(5) gamma=114.625(8)  
 Temperature: 294 K

|                        | Calculated   | Reported     |
|------------------------|--------------|--------------|
| Volume                 | 1313.2(2)    | 1313.2(2)    |
| Space group            | P -1         | P -1         |
| Hall group             | -P 1         | -P 1         |
| Moiety formula         | C16 H16 N2 O | C16 H16 N2 O |
| Sum formula            | C16 H16 N2 O | C16 H16 N2 O |
| Mr                     | 252.31       | 252.32       |
| Dx, g cm <sup>-3</sup> | 1.276        | 1.276        |
| Z                      | 4            | 4            |
| Mu (mm <sup>-1</sup> ) | 0.081        | 0.081        |
| F000                   | 536.0        | 536.2        |
| F000'                  | 536.20       |              |
| h, k, lmax             | 13, 13, 15   | 13, 13, 15   |
| Nref                   | 4639         | 4631         |
| Tmin, Tmax             |              |              |
| Tmin'                  |              |              |

Correction method= Not given

Data completeness= 0.998 Theta(max)= 25.000

R(reflections)= 0.0554( 3348) wR2(reflections)= 0.1550( 4631)

S = 1.065 Npar= 351

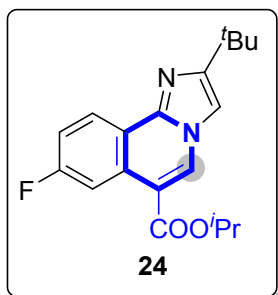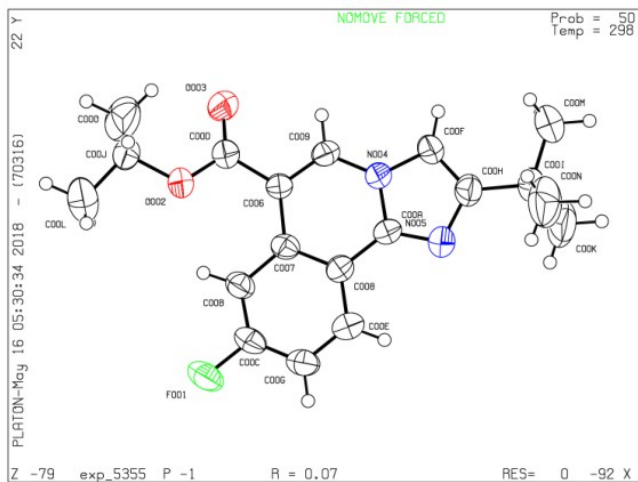

Bond precision: C-C = 0.0051 Å

Wavelength=0.71073

Cell: a=6.3592 (9) b=9.7262 (14) c=15.058 (2)  
 alpha=92.739 (11) beta=99.147 (11) gamma=106.484 (12)

Temperature: 298 K

|                        | Calculated      | Reported        |
|------------------------|-----------------|-----------------|
| Volume                 | 877.5 (2)       | 877.4 (2)       |
| Space group            | P -1            | P -1            |
| Hall group             | -P 1            | -P 1            |
| Moiety formula         | C19 H21 F N2 O2 | C19 H21 F N2 O2 |
| Sum formula            | C19 H21 F N2 O2 | C19 H21 F N2 O2 |
| Mr                     | 328.38          | 328.39          |
| Dx, g cm <sup>-3</sup> | 1.243           | 1.243           |
| Z                      | 2               | 2               |
| Mu (mm <sup>-1</sup> ) | 0.088           | 0.088           |
| F000                   | 348.0           | 348.2           |
| F000'                  | 348.17          |                 |
| h, k, lmax             | 7, 11, 17       | 7, 11, 17       |
| Nref                   | 3094            | 3088            |
| Tmin, Tmax             |                 | 0.392, 1.000    |
| Tmin'                  |                 |                 |

Correction method= # Reported T Limits: Tmin=0.392 Tmax=1.000  
 AbsCorr = MULTI-SCAN

Data completeness= 0.998

Theta(max)= 25.000

R(reflections)= 0.0664 ( 1559)

wR2(reflections)= 0.2011 ( 3088)

S = 1.041

Npar= 221

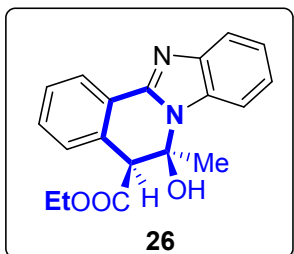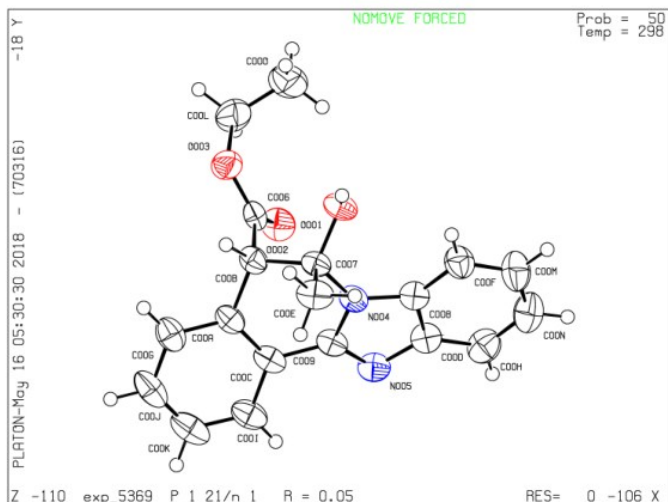

Bond precision: C-C = 0.0038 Å

Wavelength=0.71073

Cell: a=9.0284(9) b=12.6694(8) c=14.2980(11)

alpha=90 beta=96.266(8) gamma=90

Temperature: 298 K

|                        | Calculated    | Reported      |
|------------------------|---------------|---------------|
| Volume                 | 1625.7(2)     | 1625.7(2)     |
| Space group            | P 21/n        | P 21/n 1      |
| Hall group             | -P 2yn        | -P 2ybc (x-   |
| Moiety formula         | C19 H18 N2 O3 | C19 H18 N2 O3 |
| Sum formula            | C19 H18 N2 O3 | C19 H18 N2 O3 |
| Mr                     | 322.35        | 322.37        |
| Dx, g cm <sup>-3</sup> | 1.317         | 1.317         |
| Z                      | 4             | 4             |
| Mu (mm <sup>-1</sup> ) | 0.090         | 0.090         |
| F000                   | 680.0         | 680.3         |
| F000'                  | 680.31        |               |
| h, k, lmax             | 10, 15, 17    | 10, 15, 17    |
| Nref                   | 2859          | 2850          |
| Tmin, Tmax             |               | 0.580, 1.000  |
| Tmin'                  |               |               |

Correction method= # Reported T Limits: Tmin=0.580 Tmax=1.000

AbsCorr = MULTI-SCAN

Data completeness= 0.997

Theta(max)= 25.000

R(reflections)= 0.0527( 1893)

wR2(reflections)= 0.1359( 2850)

S = 1.065

Npar= 220

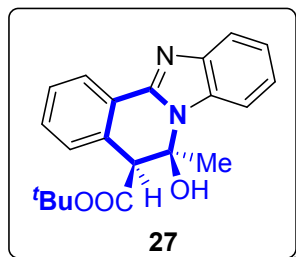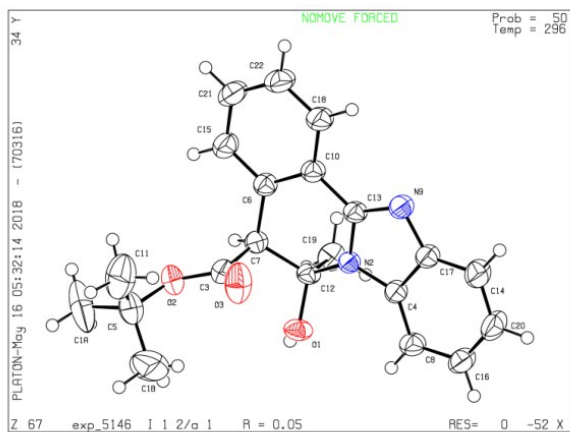

Bond precision: C-C = 0.0027 Å

Wavelength=0.71073

Cell: a=13.1564 (5) b=14.1743 (6) c=20.5373 (10)  
 alpha=90 beta=93.892 (5) gamma=90  
 Temperature: 296 K

|                        | Calculated    | Reported      |
|------------------------|---------------|---------------|
| Volume                 | 3821.0 (3)    | 3821.0 (3)    |
| Space group            | I 2/a         | I 1 2/a 1     |
| Hall group             | -I 2ya        | -I 2ya        |
| Moiety formula         | C21 H22 N2 O3 | C21 H22 N2 O3 |
| Sum formula            | C21 H22 N2 O3 | C21 H22 N2 O3 |
| Mr                     | 350.41        | 350.42        |
| Dx, g cm <sup>-3</sup> | 1.218         | 1.218         |
| Z                      | 8             | 8             |
| Mu (mm <sup>-1</sup> ) | 0.082         | 0.082         |
| F000                   | 1488.0        | 1488.7        |
| F000'                  | 1488.66       |               |
| h, k, lmax             | 15, 16, 24    | 15, 16, 24    |
| Nref                   | 3361          | 3352          |
| Tmin, Tmax             |               | 0.606, 1.000  |
| Tmin'                  |               |               |

Correction method= # Reported T Limits: Tmin=0.606 Tmax=1.000  
 AbsCorr = MULTI-SCAN

Data completeness= 0.997 Theta(max)= 24.990

R(reflections)= 0.0474 ( 2619) wR2(reflections)= 0.1528 ( 3352)

S = 1.067 Npar= 239

## 6. Characterization of Products

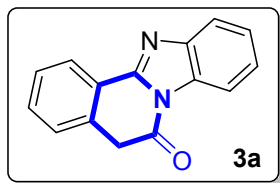

**Benzo[4,5]imidazo[2,1-*a*]isoquinolin-6(5*H*)-one (3a)** was obtained as a yellow solid (42 mg, 90%), m.p. = 147–150 °C;  $^1\text{H NMR}$  (500 MHz,  $\text{CDCl}_3$ )  $\delta$  8.44–8.37 (m, 1H), 8.29 (dd,  $J = 6.7, 2.4$  Hz, 1H), 7.79 (dd,  $J = 6.6, 2.2$  Hz, 1H), 7.52–7.36 (m, 4H), 7.35–7.27 (m, 1H), 4.19 (s, 2H);  $^{13}\text{C NMR}$  (126 MHz,  $\text{CDCl}_3$ )  $\delta$  166.5, 150.6, 143.8, 132.3, 131.3, 131.1, 128.1, 127.7, 126.1, 125.8, 125.6, 123.2, 119.8, 115.4, 37.5; **HRMS (ESI) calcd for  $\text{C}_{15}\text{H}_{11}\text{N}_2\text{O}^+$   $[\text{M} + \text{H}]^+$ : 235.0866; Found: 235.0864.**

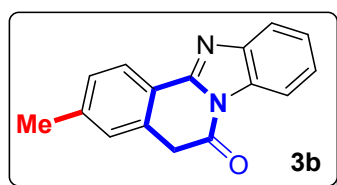

**3-Methylbenzo[4,5]imidazo[2,1-*a*]isoquinolin-6(5*H*)-one (3b)** was obtained as a yellow solid (39 mg, 78%), m.p. = 164–166 °C;  $^1\text{H NMR}$  (500 MHz,  $\text{CDCl}_3$ )  $\delta$  8.41–8.26 (m, 2H), 7.86–7.73 (m, 1H), 7.51–7.37 (m, 2H), 7.32 (d,  $J = 8.0$  Hz, 1H), 7.17 (s, 1H), 4.20 (s, 2H), 2.45 (s, 3H);  $^{13}\text{C NMR}$  (126 MHz,  $\text{CDCl}_3$ )  $\delta$  166.6, 150.8, 143.8, 141.9, 132.3, 131.0, 129.0, 128.1, 125.9, 125.7, 125.3, 120.5, 119.5, 115.3, 37.4, 21.5; **HRMS (ESI) calcd for  $\text{C}_{16}\text{H}_{13}\text{N}_2\text{O}^+$   $[\text{M} + \text{H}]^+$ : 249.1022; Found: 249.1023.**

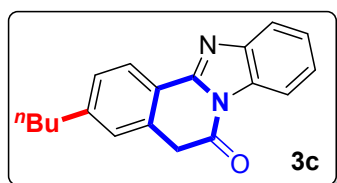

**3-Butylbenzo[4,5]imidazo[2,1-*a*]isoquinolin-6(5*H*)-one (3c)** was obtained as a yellow solid (42 mg, 73%), m.p. = 149–151 °C;  $^1\text{H NMR}$  (500 MHz,  $\text{CDCl}_3$ )  $\delta$  8.51–8.16 (m, 2H), 7.91–7.63 (m, 1H), 7.43–7.36 (m, 2H), 7.28 (d,  $J = 8.1$  Hz, 1H), 7.11 (s, 1H), 4.16 (s, 2H), 2.72–2.58 (m, 2H), 1.63 (dt,  $J = 15.4, 7.6$  Hz, 2H), 1.38 (dt,  $J = 14.9, 7.4$  Hz, 2H), 0.95 (t,  $J = 7.4$  Hz, 3H);  $^{13}\text{C NMR}$  (126 MHz,  $\text{CDCl}_3$ )  $\delta$  166.7, 150.9, 147.0, 143.9, 132.4, 131.1, 128.5, 127.5, 126.0, 125.7, 125.3, 120.8, 119.6, 115.4, 37.5, 35.6, 33.2, 22.3, 13.9; **HRMS (ESI) calcd for  $\text{C}_{19}\text{H}_{19}\text{N}_2\text{O}^+$   $[\text{M} + \text{H}]^+$ : 291.1492; Found: 291.1495.**



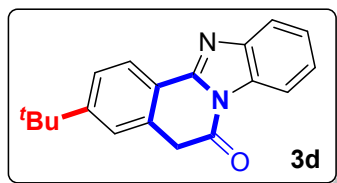

**3-(*tert*-Butyl)benzo[4,5]imidazo[2,1-*a*]isoquinolin-6(5*H*)-one (3d)** was obtained as a yellow solid (41 mg, 70%), m.p. = 136–137 °C;  $^1\text{H NMR}$  (500 MHz,  $\text{CDCl}_3$ )  $\delta$  8.37–8.25 (m, 2H), 7.78 (dd,  $J = 8.0, 1.0$  Hz, 1H), 7.51 (dd,  $J = 8.3, 1.3$  Hz, 1H), 7.44–7.35 (m, 2H), 7.32 (s, 1H), 4.20 (s, 2H), 1.37 (s, 9H);  $^{13}\text{C NMR}$  (126 MHz,  $\text{CDCl}_3$ )  $\delta$  166.8, 155.2, 150.8, 143.9, 132.2, 131.1, 125.8, 125.7, 125.5, 125.3, 124.5, 120.6, 119.6, 115.4, 37.8, 35.1, 31.1. **HRMS (ESI) calcd for  $\text{C}_{19}\text{H}_{19}\text{N}_2\text{O}^+$  [ $\text{M} + \text{H}$ ] $^+$ :** 291.1492; Found: 291.1494.

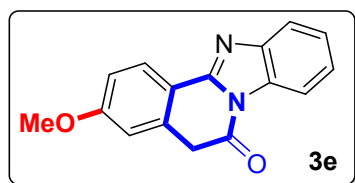

**3-Methoxybenzo[4,5]imidazo[2,1-*a*]isoquinolin-6(5*H*)-one (3e)** was obtained as a yellow solid (52 mg, 98%), m.p. = 154–155 °C;  $^1\text{H NMR}$  (500 MHz,  $\text{CDCl}_3$ ) 8.32–8.15 (m, 2H), 7.72 (dd,  $J = 7.0, 0.8$  Hz, 1H), 7.44–7.30 (m, 2H), 6.95 (dd,  $J = 8.7, 2.4$  Hz, 1H), 6.76–6.65 (m, 1H), 4.11 (s, 2H), 3.83 (s, 3H);  $^{13}\text{C NMR}$  (126 MHz,  $\text{CDCl}_3$ )  $\delta$  166.4, 162.0, 150.7, 143.9, 134.4, 131.0, 127.7, 125.6, 125.0, 119.3, 115.9, 115.2, 114.6, 112.2, 55.5, 37.6; **HRMS (ESI) calcd for  $\text{C}_{16}\text{H}_{13}\text{N}_2\text{O}_2^+$  [ $\text{M} + \text{H}$ ] $^+$ :** 265.0972; Found: 265.0973.

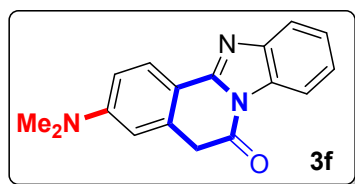

**3-(Dimethylamino)benzo[4,5]imidazo[2,1-*a*]isoquinolin-6(5*H*)-one (3f)** was obtained as a mazarine solid (44 mg, 80%), m.p. = 156–158 °C;  $^1\text{H NMR}$  (500 MHz,  $\text{CDCl}_3$ )  $\delta$  8.23 (d,  $J = 7.9$  Hz, 1H), 8.16 (d,  $J = 8.9$  Hz, 1H), 7.69 (d,  $J = 8.0$  Hz, 1H), 7.34 (ddd,  $J = 25.9, 11.3, 4.2$  Hz, 2H), 6.69 (dd,  $J = 8.9, 2.3$  Hz, 1H), 6.33 (d,  $J = 1.3$  Hz, 1H), 4.04 (s, 2H), 2.95 (d,  $J = 6.7$  Hz, 6H);  $^{13}\text{C NMR}$  (126 MHz,  $\text{CDCl}_3$ )  $\delta$  167.0, 151.9, 151.8, 144.4, 134.2, 131.1, 127.2, 125.4, 124.3, 118.8, 115.1, 111.7, 110.5, 108.9, 39.9, 37.9; **HRMS (ESI) calcd for  $\text{C}_{17}\text{H}_{16}\text{N}_3\text{O}^+$  [ $\text{M} + \text{H}$ ] $^+$ :** 278.1288; Found: 278.1290.

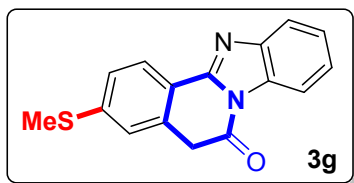

**3-(Methylthio)benzo[4,5]imidazo[2,1-*a*]isoquinolin-6(5*H*)-one (3g)** was obtained as a mazarine solid (42 mg, 75%), m.p. = 108–110 °C;  $^1\text{H NMR}$  (500 MHz,  $\text{CDCl}_3$ )  $\delta$  8.36–8.24 (m, 2H), 7.83–7.70 (m, 1H), 7.48–7.35 (m, 2H), 7.29 (dd,  $J$  = 8.4, 1.5 Hz, 1H), 7.12 (s, 1H), 4.16 (s, 2H), 2.54 (s, 3H);  $^{13}\text{C NMR}$  (126 MHz,  $\text{CDCl}_3$ )  $\delta$  166.2, 150.5, 143.9, 143.8, 132.6, 131.1, 126.3, 125.8, 125.4, 125.1, 123.9, 119.7, 119.6, 115.4, 37.4, 14.9; **HRMS (ESI) calcd for  $\text{C}_{16}\text{H}_{13}\text{N}_2\text{OS}^+$  [ $\text{M} + \text{H}$ ] $^+$ : 281.0743; Found: 281.0746.**

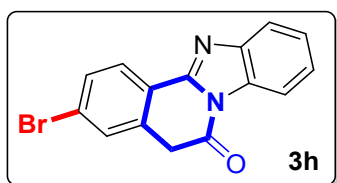

**3-Bromobenzo[4,5]imidazo[2,1-*a*]isoquinolin-6(5*H*)-one (3h)** was obtained as a yellow solid (41 mg, 65%), m.p. = 157–160 °C;  $^1\text{H NMR}$  (500 MHz,  $\text{CDCl}_3$ )  $\delta$  8.30–8.20 (m, 2H), 7.76 (dd,  $J$  = 5.9, 2.7 Hz, 1H), 7.58 (d,  $J$  = 8.4 Hz, 1H), 7.47 (s, 1H), 7.45–7.36 (m, 2H), 4.16 (s, 2H);  $^{13}\text{C NMR}$  (126 MHz,  $\text{CDCl}_3$ )  $\delta$  165.5, 149.7, 143.7, 134.0, 131.5, 131.0, 130.7, 127.4, 126.0, 125.9, 125.8, 122.2, 119.8, 115.4, 37.1; **HRMS (ESI) calcd for  $\text{C}_{15}\text{H}_{10}\text{BrN}_2\text{O}^+$  [ $\text{M} + \text{H}$ ] $^+$ : 312.9971; Found: 312.9973.**

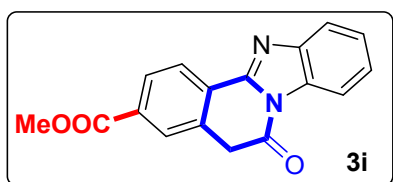

**6-Oxo-5,6-dihydrobenzo[4,5]imidazo[2,1-*a*]isoquinolin-3-yl acetate (3i)** was obtained as a yellow solid (23 mg, 40%), m.p. = 208–210 °C;  $^1\text{H NMR}$  (500 MHz,  $\text{CDCl}_3$ )  $\delta$  8.50 (d,  $J$  = 8.2 Hz, 1H), 8.43–8.27 (m, 1H), 8.12 (d,  $J$  = 8.2 Hz, 1H), 8.02 (s, 1H), 7.92–7.75 (m, 1H), 7.54–7.38 (m, 2H), 4.28 (s, 2H), 3.97 (s, 3H);  $^{13}\text{C NMR}$  (126 MHz,  $\text{CDCl}_3$ )  $\delta$  166.0, 165.9, 149.5, 143.8, 132.32, 132.28, 131.1, 129.1, 129.0, 127.1, 126.24, 126.14, 126.13, 120.2, 115.6, 52.6, 37.4; **HRMS (ESI) calcd for  $\text{C}_{17}\text{H}_{13}\text{N}_2\text{O}_3^+$  [ $\text{M} + \text{H}$ ] $^+$ : 293.0921; Found: 293.0923.**

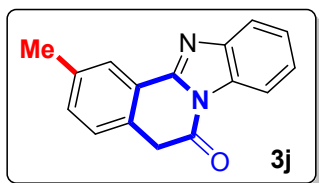

**2-Methylbenzo[4,5]imidazo[2,1-*a*]isoquinolin-6(5*H*)-one (3j)** was obtained as a yellow solid (37 mg, 75%), m.p. = 142–144 °C;  $^1\text{H NMR}$  (500 MHz,  $\text{CDCl}_3$ )  $\delta$  8.35–8.28 (m, 1H), 8.25 (s, 1H), 7.90–7.74 (m, 1H), 7.48–7.37 (m, 2H), 7.31 (dd,  $J = 7.8, 1.1$  Hz, 1H), 7.22 (d,  $J = 7.9$  Hz, 1H), 4.18 (s, 2H), 2.45 (s, 3H);  $^{13}\text{C NMR}$  (126 MHz,  $\text{CDCl}_3$ )  $\delta$  166.8, 150.9, 143.8, 138.1, 132.4, 131.1, 129.4, 127.6, 126.2, 125.8, 125.5, 123.0, 119.7, 115.5, 37.2, 21.01; **HRMS (ESI) calcd for  $\text{C}_{16}\text{H}_{13}\text{N}_2\text{O}^+$  [ $\text{M} + \text{H}$ ] $^+$ :** 249.1022; Found: 249.1024.

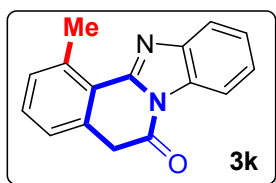

**1-Methylbenzo[4,5]imidazo[2,1-*a*]isoquinolin-6(5*H*)-one (3k)** was obtained as a yellow solid (26 mg, 53%), m.p. = 155–156 °C;  $^1\text{H NMR}$  (500 MHz,  $\text{CDCl}_3$ )  $\delta$  8.37–8.26 (m, 1H), 7.83–7.74 (m, 1H), 7.43–7.34 (m, 2H), 7.30 (t,  $J = 7.4$  Hz, 1H), 7.26–7.22 (m, 1H), 7.11 (d,  $J = 7.4$  Hz, 1H), 4.14 (s, 2H), 2.97 (s, 3H);  $^{13}\text{C NMR}$  (126 MHz,  $\text{CDCl}_3$ )  $\delta$  166.6, 150.8, 143.9, 139.9, 133.2, 131.1, 130.2, 130.0, 125.53, 125.50, 125.42 (s), 121.7, 120.0, 115.3, 38.1 24.0; **HRMS (ESI) calcd for  $\text{C}_{16}\text{H}_{13}\text{N}_2\text{O}^+$  [ $\text{M} + \text{H}$ ] $^+$ :** 249.1022; Found: 249.1023.

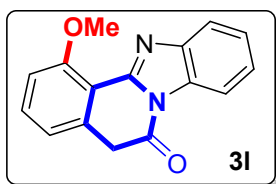

**1-Methoxybenzo[4,5]imidazo[2,1-*a*]isoquinolin-6(5*H*)-one (3l)** was obtained as a yellow solid (25 mg, 48%), m.p. = 158–159 °C;  $^1\text{H NMR}$  (500 MHz,  $\text{CDCl}_3$ )  $\delta$  8.34 (dd,  $J = 6.2, 2.8$  Hz, 1H), 8.14–7.93 (m, 1H), 7.80 (dd,  $J = 5.9, 2.2$  Hz, 1H), 7.52–7.32 (m, 3H), 7.09–6.87 (m, 1H), 4.07 (s, 2H), 3.91 (s, 3H);  $^{13}\text{C NMR}$  (126 MHz,  $\text{CDCl}_3$ )  $\delta$  166.8, 156.1, 150.7, 143.8, 131.1, 128.8, 125.8, 125.6, 124.1, 121.3, 119.8, 117.8, 115.5, 112.0, 55.6, 32.9; **HRMS (ESI) calcd for  $\text{C}_{16}\text{H}_{13}\text{N}_2\text{O}^+$  [ $\text{M} + \text{H}$ ] $^+$ :** 265.0972; Found: 265.0975.

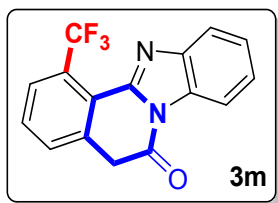

**1-(Trifluoromethyl)benzo[4,5]imidazo[2,1-*a*]isoquinolin-6(5*H*)-one (3m)** was obtained as a yellow solid (27 mg, 45%), m.p. = 142–144 °C;  $^1\text{H NMR}$  (500 MHz,  $\text{CDCl}_3$ )  $\delta$  8.37–8.28 (m, 1H), 7.95–7.85 (m, 2H), 7.61–7.50 (m, 2H), 7.48–7.41 (m, 2H), 4.27 (s, 2H);  $^{13}\text{C NMR}$  (126 MHz,  $\text{CDCl}_3$ )  $\delta$  165.4, 146.6, 143.7, 134.9, 131.8, 130.4, 130.1, 128.4 (d,  $J = 33.1$  Hz), 127.5 (q,  $J = 7.2$  Hz), 126.5, 125.9, 123.3 (q,  $J = 273.4$  Hz), 122.1, 120.9, 115.4, 38.2; **HRMS (ESI) calcd for  $\text{C}_{16}\text{H}_{10}\text{F}_3\text{N}_2\text{O}^+$  [ $\text{M} + \text{H}$ ] $^+$ :** 303.0740; Found: 303.0741.

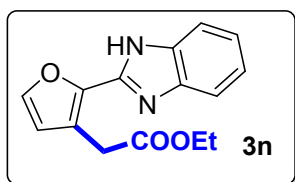

**Ethyl 2-(2-(1*H*-benzo[*d*]imidazol-2-yl)furan-3-yl)acetate (3n)** was obtained as a mazarine oil (27 mg, 50%);  $^1\text{H NMR}$  (500 MHz,  $\text{CDCl}_3$ )  $\delta$  10.40 (s, 1H), 7.63 (s, 2H), 7.45 (d,  $J = 1.6$  Hz, 1H), 7.28–7.23 (m, 2H), 6.58 (d,  $J = 1.6$  Hz, 1H), 4.22 (q,  $J = 7.1$  Hz, 2H), 4.08 (s, 2H), 1.30 (t,  $J = 7.1$  Hz, 3H);  $^{13}\text{C NMR}$  (126 MHz,  $\text{CDCl}_3$ )  $\delta$  171.9, 143.8, 143.1, 142.2, 123.0, 122.89, 122.85, 118.9, 114.4, 61.4, 31.3, 14.1; **HRMS (ESI) calcd for  $\text{C}_{15}\text{H}_{15}\text{N}_2\text{O}_3^+$  [ $\text{M} + \text{H}$ ] $^+$ :** 271.1077; Found: 271.1076.

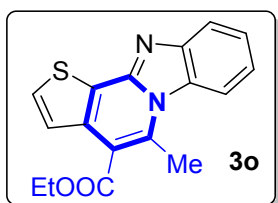

**Ethyl 5-methylbenzo[4,5]imidazo[1,2-*a*]thieno[2,3-*c*]pyridine-4-carboxylate (3o)** was obtained as a yellow solid (40 mg, 64%), m.p. = 127–128 °C;  $^1\text{H NMR}$  (500 MHz,  $\text{CDCl}_3$ )  $\delta$  8.17 (d,  $J = 8.5$  Hz, 1H), 7.98 (d,  $J = 8.0$  Hz, 1H), 7.68 (d,  $J = 5.3$  Hz, 1H), 7.61 (d,  $J = 5.3$  Hz, 1H), 7.56–7.49 (m, 1H), 7.39–7.30 (m, 1H), 4.54 (q,  $J = 7.2$  Hz, 2H), 3.25 (s, 3H), 1.50 (t,  $J = 7.2$  Hz, 3H);  $^{13}\text{C NMR}$  (126 MHz,  $\text{CDCl}_3$ )  $\delta$  167.0, 145.2, 145.2, 138.6, 136.6, 131.2, 129.8, 125.4, 125.1, 124.9, 121.7, 119.9, 115.2, 112.8, 61.8, 19.0, 14.4; **HRMS (ESI) calcd for  $\text{C}_{17}\text{H}_{15}\text{N}_2\text{O}_2\text{S}^+$  [ $\text{M} + \text{H}$ ] $^+$ :** 311.0849; Found: 311.0846.

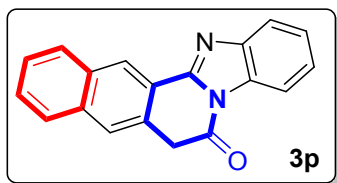

**Benzo[g]benzo[4,5]imidazo[2,1-a]isoquinolin-6(7H)-one (3p)** was obtained as a yellow solid (24 mg, 42%), m.p. = 140–142 °C;  $^1\text{H NMR}$  (500 MHz,  $\text{CDCl}_3$ )  $\delta$  8.96 (s, 1H), 8.32 (dd,  $J = 7.0, 1.5$  Hz, 1H), 7.96 (d,  $J = 7.5$  Hz, 1H), 7.89–7.77 (m, 1H), 7.74 (s, 2H), 7.53 (pd,  $J = 6.8, 1.4$  Hz, 2H), 7.49–7.33 (m, 2H), 4.36 (s, 2H);  $^{13}\text{C NMR}$  (126 MHz,  $\text{CDCl}_3$ )  $\delta$  166.5, 150.7, 143.9, 134.4, 132.4, 131.3, 128.9, 128.2, 128.1, 127.4, 126.9, 126.7, 126.5, 125.9, 125.6, 120.9, 119.7, 115.5, 37.6; **HRMS (ESI) calcd for  $\text{C}_{19}\text{H}_{13}\text{N}_2\text{O}^+$   $[\text{M} + \text{H}]^+$ : 285.1022; Found: 285.1021.**

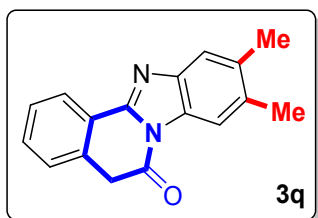

**9,10-Dimethylbenzo[4,5]imidazo[2,1-a]isoquinolin-6(5H)-one (3q)** was obtained as a yellow solid (21 mg, 41%), m.p. = 148–151 °C;  $^1\text{H NMR}$  (500 MHz,  $\text{CDCl}_3$ )  $\delta$  8.39 (dd,  $J = 6.1, 2.9$  Hz, 1H), 8.07 (s, 1H), 7.54 (s, 1H), 7.51–7.42 (m, 2H), 7.36–7.28 (m, 1H), 4.18 (s, 2H), 2.40 (s, 3H), 2.38 (s, 3H);  $^{13}\text{C NMR}$  (126 MHz,  $\text{CDCl}_3$ )  $\delta$  166.5, 149.9, 142.3, 134.9, 134.8, 132.2, 130.9, 129.4, 128.0, 127.7, 125.9, 123.6, 120.0, 115.7, 37.5, 20.5, 20.5; **HRMS (ESI) calcd for  $\text{C}_{17}\text{H}_{15}\text{N}_2\text{O}^+$   $[\text{M} + \text{H}]^+$ : 263.1179; Found: 263.1176.**

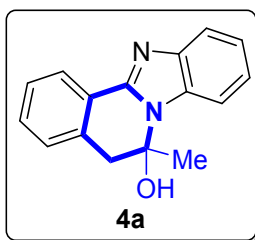

**6-Methyl-5,6-dihydrobenzo[4,5]imidazo[2,1-a]isoquinolin-6-ol (4a)** was obtained as a white solid (36 mg, 72%), m.p. = 95–98 °C;  $^1\text{H NMR}$  (500 MHz,  $\text{DMSO}$ )  $\delta$  8.25–8.11 (m, 1H), 8.09–7.95 (m, 1H), 7.79–7.65 (m, 1H), 7.50 (m, 2H), 7.49 (s, 1H), 7.36–7.21 (m, 3H), 3.46 (dd,  $J = 85.1, 15.3$  Hz, 1H), 1.56 (s, 3H);  $^{13}\text{C NMR}$  (126 MHz,  $\text{DMSO}$ )  $\delta$  149.0, 144.2, 135.2, 134.2, 131.4, 129.7, 128.5, 126.0, 123.6, 123.1,

119.8, 114.6, 87.3, 44.2, 27.2; **HRMS (ESI) calcd for** C<sub>16</sub>H<sub>15</sub>N<sub>2</sub>O<sup>+</sup> [M + H]<sup>+</sup>: 251.1179; Found: 251.1180.

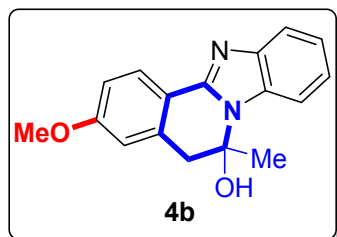

**3-Methoxy-6-methyl-5,6-dihydrobenzo[4,5]imidazo[2,1-a]isoquinolin-6-ol (4b)** was obtained as a white solid (39 mg, 69%), m.p. = 100–101 °C; **<sup>1</sup>H NMR (500 MHz, CDCl<sub>3</sub>)** δ 7.93–7.76 (m, 2H), 7.54 (dd, *J* = 6.6, 2.1 Hz, 1H), 7.16–7.05 (m, 2H), 6.66–6.54 (m, 1H), 6.51 (dd, *J* = 8.6, 2.4 Hz, 1H), 3.76 (s, 3H), 3.27 (dd, *J* = 108.2, 15.6 Hz, 2H), 1.62 (s, 3H); **<sup>13</sup>C NMR (126 MHz, CDCl<sub>3</sub>)** δ 161.1, 148.7, 143.5, 134.9, 133.2, 127.3, 122.5, 122.3, 118.5, 117.7, 113.6, 113.3, 112.9, 86.6, 55.3, 44.8, 26.2; **HRMS (ESI) calcd for** C<sub>17</sub>H<sub>17</sub>N<sub>2</sub>O<sub>2</sub><sup>+</sup> [M + H]<sup>+</sup>: 281.1285; Found: 281.1283.

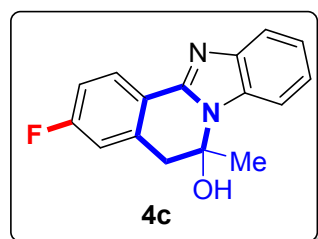

**3-Fluoro-6-methyl-5,6-dihydrobenzo[4,5]imidazo[2,1-a]isoquinolin-6-ol (4c)** was obtained as a white solid (35 mg, 65%), m.p. = 121–124 °C; **<sup>1</sup>H NMR (500 MHz, DMSO)** δ 8.21 (dd, *J* = 8.6, 5.8 Hz, 1H), 8.03–7.93 (m, 1H), 7.74–7.65 (m, 1H), 7.38 (dd, *J* = 9.4, 2.4 Hz, 1H), 7.35–7.28 (m, 1H), 7.26 (s, 1H), 7.28–7.25 (m, 2H), 3.47 (dd, *J* = 58.0, 16.0 Hz, 2H), 1.57 (s, 3H); **<sup>13</sup>C NMR (126 MHz, DMSO)** δ 163.9 (d, *J* = 247.9 Hz), 148.4, 144.8, 138.0 (d, *J* = 8.9 Hz), 134.3, 128.3 (d, *J* = 9.1 Hz), 123.3, 123.0 (d, *J* = 2.7 Hz), 122.9, 120.0, 116.4 (d, *J* = 22.4 Hz), 115.7 (d, *J* = 22.1 Hz), 114.4, 86.9, 44.1, 27.3; **HRMS (ESI) calcd for** C<sub>16</sub>H<sub>14</sub>FN<sub>2</sub>O<sup>+</sup> [M + H]<sup>+</sup>: 269.1085; Found: 269.1087.

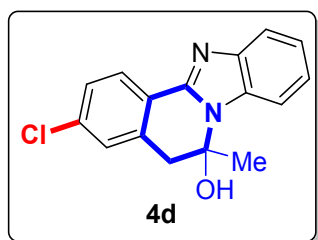

**3-Chloro-6-methyl-5,6-dihydrobenzo[4,5]imidazo[2,1-*a*]isoquinolin-6-ol (4d)** was obtained as a white solid (45 mg, 79%), m.p. = 130–131 °C; <sup>1</sup>H NMR (500 MHz, DMSO) δ 8.16 (d, *J* = 8.3 Hz, 1H), 8.03–7.96 (m, 1H), 7.76–7.68 (m, 1H), 7.60 (d, *J* = 1.6 Hz, 1H), 7.52 (dd, *J* = 8.3, 2.0 Hz, 1H), 7.31–7.24 (m, 3H), 3.46 (dd, *J* = 49.3, 16.0 Hz, 2H), 1.57 (s, 3H); <sup>13</sup>C NMR (126 MHz, DMSO) δ 148.2, 144.8, 137.3, 135.5, 134.4, 129.5, 128.6, 127.6, 125.3, 123.6, 123.1, 120.1, 114.5, 87.0, 43.8, 27.3; HRMS (ESI) calcd for C<sub>16</sub>H<sub>14</sub>ClN<sub>2</sub>O<sup>+</sup> [M + H]<sup>+</sup>: 285.0789; Found: 285.0787.

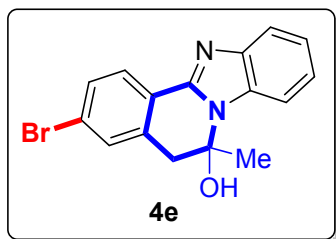

**3-Bromo-6-methyl-5,6-dihydrobenzo[4,5]imidazo[2,1-*a*]isoquinolin-6-ol (4e)** was obtained as a white solid (42 mg, 64%), m.p. = 143–145 °C; <sup>1</sup>H NMR (500 MHz, DMSO) δ 8.09 (d, *J* = 8.3 Hz, 1H), 8.05–7.96 (m, 1H), 7.75 (d, *J* = 0.9 Hz, 1H), 7.74–7.69 (m, 1H), 7.66 (dd, *J* = 8.3, 1.7 Hz, 1H), 7.34–7.23 (m, 3H), 3.47 (dd, *J* = 51.4, 16.0 Hz, 2H), 1.57 (s, 3H); <sup>13</sup>C NMR (126 MHz, DMSO) δ 148.3, 144.8, 137.5, 134.3, 132.3, 131.4, 127.8, 125.6, 124.2, 123.6, 123.1, 120.1, 114.5, 87.0, 43.7, 27.3; HRMS (ESI) calcd for C<sub>16</sub>H<sub>14</sub>BrN<sub>2</sub>O<sup>+</sup> [M + H]<sup>+</sup>: 329.0284; Found: 329.0288.

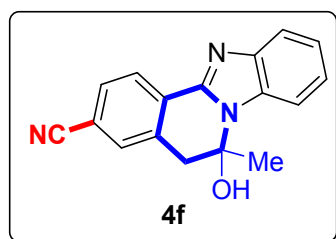

**6-Hydroxy-6-methyl-5,6-dihydrobenzo[4,5]imidazo[2,1-*a*]isoquinoline-3-carbonitrile (4f)** was obtained as a white solid (31 mg, 56%), m.p. = 185–186 °C; <sup>1</sup>H NMR (500 MHz, DMSO) δ 8.31 (d, *J* = 8.0 Hz, 1H), 8.06–7.96 (m, 2H), 7.92 (dd, *J* = 8.0, 1.2 Hz, 1H), 7.77 (dd, *J* = 6.9, 1.8 Hz, 1H), 7.35 (s, 1H), 7.31 (ddd, *J* = 14.2, 7.1, 1.4 Hz, 2H), 3.51 (q, *J* = 16.0 Hz, 2H), 1.60 (s, 3H); <sup>13</sup>C NMR (126 MHz, DMSO) δ 147.4, 144.8, 136.1, 134.4, 133.5, 132.2, 130.5, 126.4, 124.3, 123.4, 120.6, 119.5, 114.7, 112.9, 87.0, 43.6, 27.4; HRMS (ESI) calcd for C<sub>17</sub>H<sub>14</sub>N<sub>3</sub>O<sup>+</sup> [M + H]<sup>+</sup>: 276.1131; Found: 276.1134.

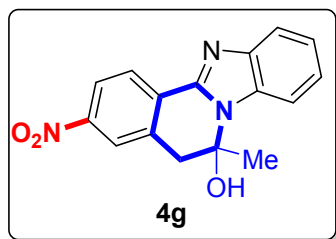

**6-Methyl-3-nitro-5,6-dihydrobenzo[4,5]imidazo[2,1-*a*]isoquinolin-6-ol (4g)** was obtained as a white solid (42 mg, 77%), m.p. = 160–162 °C;  $^1\text{H NMR}$  (500 MHz, DMSO)  $\delta$  8.45–8.34 (m, 2H), 8.28 (d,  $J$  = 8.2 Hz, 1H), 8.04 (d,  $J$  = 7.7 Hz, 1H), 7.78 (d,  $J$  = 7.6 Hz, 1H), 7.40 (s, 1H), 7.37–7.23 (m, 2H), 3.62 (q,  $J$  = 16.1 Hz, 2H), 1.62 (s, 3H);  $^{13}\text{C NMR}$  (126 MHz, DMSO)  $\delta$  148.8, 147.1, 144.9, 136.6, 134.5, 132.2, 127.0, 124.9, 124.5, 123.7, 123.6, 120.7, 114.8, 87.1, 43.7, 27.4; **HRMS (ESI) calcd for  $\text{C}_{16}\text{H}_{14}\text{N}_3\text{O}_3^+$  [ $\text{M} + \text{H}$ ] $^+$ : 296.1030; Found: 296.1031.**

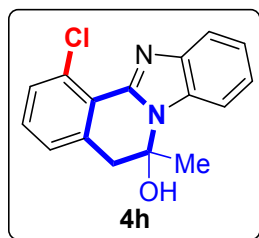

**1-Chloro-6-methyl-5,6-dihydrobenzo[4,5]imidazo[2,1-*a*]isoquinolin-6-ol (4h)** was obtained as a white solid (44 mg, 78%), m.p. = 133–135 °C;  $^1\text{H NMR}$  (500 MHz, DMSO)  $\delta$  8.04 (dd,  $J$  = 7.2, 1.1 Hz, 1H), 7.78 (dd,  $J$  = 7.1, 1.3 Hz, 1H), 7.59–7.52 (m, 1H), 7.49–7.43 (m, 2H), 7.34–7.26 (m, 2H), 7.26 (s, 1H), 3.45 (dd,  $J$  = 61.7, 15.5 Hz, 2H), 1.58 (s, 3H);  $^{13}\text{C NMR}$  (126 MHz, DMSO)  $\delta$  146.3, 144.4, 138.3, 133.4, 132.2, 131.6, 131.5, 128.8, 124.0, 122.9, 120.6, 114.5, 86.2, 45.2, 26.9; **HRMS (ESI) calcd for  $\text{C}_{16}\text{H}_{14}\text{ClN}_2\text{O}^+$  [ $\text{M} + \text{H}$ ] $^+$ : 285.0789; Found: 285.0787.**

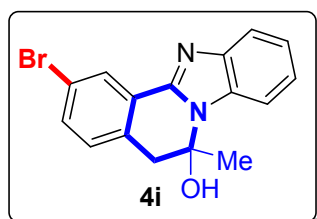

**2-Bromo-6-methyl-5,6-dihydrobenzo[4,5]imidazo[2,1-*a*]isoquinolin-6-ol (4i)** was obtained as a white solid (36 mg, 55%), m.p. = 148–151 °C;  $^1\text{H NMR}$  (500 MHz, DMSO)  $\delta$  8.26 (m, 1H), 8.00 (d,  $J$  = 4.1 Hz, 1H), 7.72 (dd,  $J$  = 41.8, 19.7 Hz, 2H), 7.45 (d,  $J$  = 7.0 Hz, 1H), 7.28 (m, 3H), 3.49–3.32 (m, 2H), 1.57 (s, 3H);  $^{13}\text{C NMR}$  (126 MHz, DMSO)  $\delta$  147.6, 144.7, 134.4, 134.3, 133.6, 132.0, 128.4, 128.0, 123.8,



123.2, 121.3, 120.3, 114.6, 87.1, 43.7, 27.3; **HRMS (ESI) calcd for** C<sub>16</sub>H<sub>14</sub>BrN<sub>2</sub>O<sup>+</sup> [M + H]<sup>+</sup>: 329.0284; Found: 329.0282.

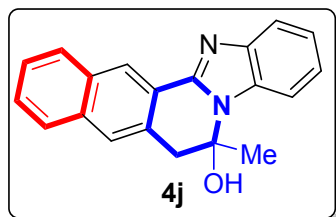

**6-Methyl-6,7-dihydrobenzo[g]benzo[4,5]imidazo[2,1-a]isoquinolin-6-ol (4j)** was obtained as a white solid (35 mg, 58%), m.p. = 117–119 °C; **<sup>1</sup>H NMR (500 MHz, DMSO)** δ 8.80 (s, 1H), 8.13 (d, *J* = 7.7 Hz, 1H), 8.07–8.01 (m, 1H), 7.99 (s, 1H), 7.97 (d, *J* = 7.8 Hz, 1H), 7.78–7.71 (m, 1H), 7.67–7.55 (m, 1H), 7.31 (s, 1H), 7.29 (dd, *J* = 6.1, 3.2 Hz, 2H), 3.61 (dd, *J* = 64.5, 15.4 Hz, 2H), 1.59 (s, 3H); **<sup>13</sup>C NMR (126 MHz, DMSO)** δ 149.0, 145.0, 134.6, 134.5, 133.1, 132.0, 129.5, 128.3, 128.3, 127.9, 127.3, 125.7, 124.6, 123.4, 123.0, 120.0, 114.6, 87.1, 44.7, 27.4; **HRMS (ESI) calcd for** C<sub>20</sub>H<sub>17</sub>N<sub>2</sub>O<sup>+</sup> [M + H]<sup>+</sup>: 301.1335; Found: 301.1334.

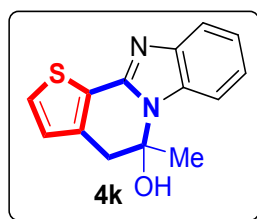

**5-Methyl-4,5-dihydrobenzo[4,5]imidazo[1,2-a]thieno[2,3-c]pyridin-5-ol (4k)** was obtained as a white solid (16 mg, 32%), m.p. = 128–131 °C; **<sup>1</sup>H NMR (500 MHz, DMSO)** δ 7.95 (dd, *J* = 6.8, 1.9 Hz, 1H), 7.78 (d, *J* = 4.9 Hz, 1H), 7.66–7.58 (m, 1H), 7.27 (s, 1H), 7.27–7.21 (m, 2H), 7.20 (d, *J* = 4.9 Hz, 1H), 3.46–3.35 (m, 2H), 1.57 (s, 3H); **<sup>13</sup>C NMR (126 MHz, DMSO)** δ 146.4, 144.9, 139.8, 134.2, 129.9, 128.9, 125.9, 123.4, 122.8, 119.7, 114.0, 88.8, 41.2, 27.2; **HRMS (ESI) calcd for** C<sub>14</sub>H<sub>13</sub>SN<sub>2</sub>O<sup>+</sup> [M + H]<sup>+</sup>: 257.0743; Found: 257.0746.

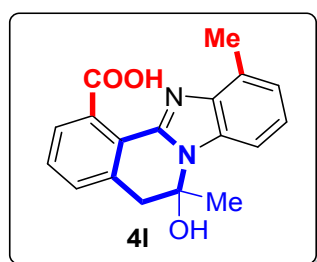

**6-Hydroxy-6,11-dimethyl-5,6-dihydrobenzo[4,5]imidazo[2,1-a]isoquinoline-1-carboxylic acid (4l)** was obtained as a white solid (46 mg, 75%), m.p. = 180–183 °C;

**<sup>1</sup>H NMR (500 MHz, DMSO)**  $\delta$  8.01 (d,  $J$  = 7.5 Hz, 1H), 7.91 (d,  $J$  = 8.2 Hz, 1H), 7.66 (d,  $J$  = 7.3 Hz, 1H), 7.61 (t,  $J$  = 7.6 Hz, 1H), 7.40 (s, 1H), 7.33–7.25 (m, 1H), 7.18 (d,  $J$  = 7.3 Hz, 1H), 3.54 (dd,  $J$  = 59.6, 15.8 Hz, 2H), 2.61 (s, 3H), 1.61 (s, 3H); **<sup>13</sup>C NMR (126 MHz, DMSO)**  $\delta$  168.9, 146.4, 140.4, 136.6, 133.3, 132.6, 132.5, 131.7, 131.2, 128.7, 124.8, 124.1, 122.5, 112.5, 86.8, 44.9, 26.8, 17.2.

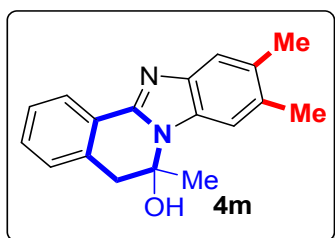

**6,9,10-Trimethyl-5,6-dihydrobenzo[4,5]imidazo[2,1-*a*]isoquinolin-6-ol (4m)** was obtained as a white solid (32 mg, 58%), m.p. = 111–112 °C; **<sup>1</sup>H NMR (500 MHz, DMSO)**  $\delta$  8.16–8.09 (m, 1H), 7.78 (s, 1H), 7.47 (s, 1H), 7.46–7.39 (m, 3H), 7.13 (s, 1H), 3.41 (dd,  $J$  = 78.6, 15.7 Hz, 2H), 2.38 (s, 3H), 2.35 (s, 3H), 1.53 (s, 3H); **<sup>13</sup>C NMR (126 MHz, DMSO)**  $\delta$  148.3, 143.5, 134.8, 132.9, 131.9, 131.2, 130.7, 129.5, 128.3, 126.6, 125.6, 120.0, 114.5, 86.9, 44.3, 27.2, 21.3, 20.9; **HRMS (ESI) calcd for C<sub>18</sub>H<sub>19</sub>N<sub>2</sub>O<sup>+</sup> [M + H]<sup>+</sup>: 279.1492; Found: 279.1495.**

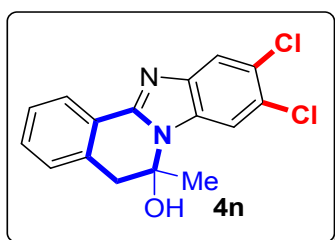

**9,10-Dichloro-6-methyl-5,6-dihydrobenzo[4,5]imidazo[2,1-*a*]isoquinolin-6-ol (4n)** was obtained as a white solid (45 mg, 70%), m.p. = 119–120 °C; **<sup>1</sup>H NMR (500 MHz, DMSO)**  $\delta$  8.17 (s, 1H), 8.17–8.13 (m, 1H), 7.99 (s, 1H), 7.57–7.46 (m, 3H), 7.46 (s, 1H), 3.46 (dd,  $J$  = 72.5, 15.8 Hz, 2H), 1.54 (s, 3H). **<sup>13</sup>C NMR (126 MHz, DMSO)**  $\delta$  151.5, 144.5, 135.4, 133.7, 132.0, 129.8, 128.7, 126.2, 125.5, 125.5, 121.1, 115.4, 87.7, 43.9, 27.1; **HRMS (ESI) calcd for C<sub>16</sub>H<sub>13</sub>Cl<sub>2</sub>N<sub>2</sub>O<sup>+</sup> [M + H]<sup>+</sup>: 319.0399; Found: 319.0398.**

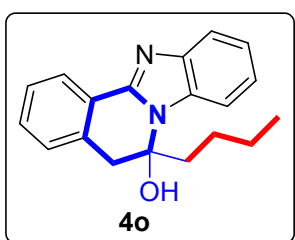

**6-Butyl-5,6-dihydrobenzo[4,5]imidazo[2,1-*a*]isoquinolin-6-ol (4o)** was obtained as a white solid (46 mg, 78%), m.p. = 111–112 °C;  $^1\text{H NMR}$  (500 MHz,  $\text{CHCl}_3$ )  $\delta$  8.02–7.86 (m, 2H), 7.59 (dd,  $J = 6.2, 2.3$  Hz, 1H), 7.22–7.11 (m, 3H), 7.10–6.98 (m, 2H), 3.35 (q,  $J = 15.7$  Hz, 2H), 1.98–1.69 (m, 2H), 1.36–1.22 (m, 2H), 1.14 (ddd,  $J = 14.4, 9.7, 5.0$  Hz, 2H), 0.75 (t,  $J = 7.3$  Hz, 3H);  $^{13}\text{C NMR}$  (126 MHz,  $\text{CHCl}_3$ )  $\delta$  148.5, 143.4, 133.6, 133.1, 130.1, 127.8, 127.5, 125.5, 125.3, 122.8, 122.4, 118.9, 113.9, 89.1, 42.3, 38.9, 26.0, 22.6, 13.8; **HRMS (ESI) calcd for  $\text{C}_{19}\text{H}_{21}\text{N}_2\text{O}^+$  [ $\text{M} + \text{H}$ ] $^+$** : 293.1648; Found: 293.1648.

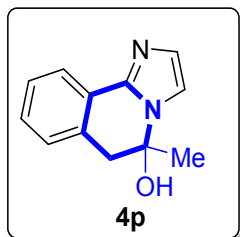

**5-Methyl-5,6-dihydroimidazo[2,1-*a*]isoquinolin-5-ol (4p)** was obtained as a white solid (25 mg, 62%), m.p. = 200–201 °C;  $^1\text{H NMR}$  (500 MHz,  $\text{DMSO}$ )  $\delta$  7.95–7.79 (m, 1H), 7.44 (d,  $J = 1.0$  Hz, 1H), 7.40–7.26 (m, 3H), 7.06 (d,  $J = 0.8$  Hz, 1H), 6.72 (s, 1H), 3.23 (s, 2H), 1.63 (s, 3H);  $^{13}\text{C NMR}$  (126 MHz,  $\text{DMSO}$ )  $\delta$  143.4, 133.0, 129.7, 129.5, 129.1, 128.0, 127.1, 123.6, 116.6, 83.9, 43.1, 28.6; **HRMS (ESI) calcd for  $\text{C}_{12}\text{H}_{13}\text{N}_2\text{O}^+$  [ $\text{M} + \text{H}$ ] $^+$** : 201.1022; Found: 201.1024.

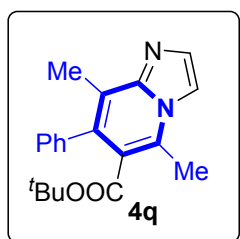

**tert-Butyl 5,8-dimethyl-7-phenylimidazo[1,2-*a*]pyridine-6-carboxylate (4q)** was obtained as a yellow solid (49 mg, 76%), m.p. = 103–106 °C;  $^1\text{H NMR}$  (500 MHz,  $\text{CDCl}_3$ )  $\delta$  7.74 (s, 1H), 7.55 (s, 1H), 7.46–7.34 (m, 3H), 7.26 (m, 2H), 2.63 (s, 3H), 2.39 (s, 3H), 1.15 (s, 9H);  $^{13}\text{C NMR}$  (126 MHz,  $\text{DMSO}$ )  $\delta$  166.8, 145.4, 138.0, 134.1, 129.7, 129.6, 128.1, 127.5, 126.4, 122.9, 121.8, 110.6, 82.2, 27.4, 16.2, 14.3; **HRMS (ESI) calcd for  $\text{C}_{20}\text{H}_{23}\text{N}_2\text{O}_2^+$  [ $\text{M} + \text{H}$ ] $^+$** : 323.1754; Found: 323.1756.

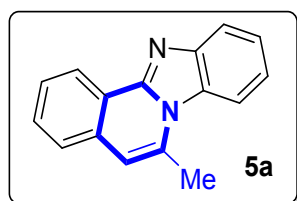

**6-Methylbenzo[4,5]imidazo[2,1-*a*]isoquinoline (5a)** was obtained as a yellow solid (46 mg, 99%), m.p. = 166–168 °C;  $^1\text{H NMR}$  (500 MHz,  $\text{CDCl}_3$ )  $\delta$  8.88–8.74 (m, 1H), 8.05 (dd,  $J = 16.5, 8.3$  Hz, 2H), 7.68–7.56 (m, 3H), 7.49 (dd,  $J = 11.3, 4.0$  Hz, 1H), 7.37–7.29 (m, 1H), 6.73 (s, 1H), 2.98 (s, 3H);  $^{13}\text{C NMR}$  (126 MHz,  $\text{CDCl}_3$ )  $\delta$  148.3, 144.2, 134.7, 131.7, 131.3, 129.9, 127.1, 125.7, 124.9, 124.2, 122.1, 121.6, 119.8, 113.9, 110.8, 21.2; **HRMS (ESI) calcd for**  $\text{C}_{16}\text{H}_{13}\text{N}_2^+$   $[\text{M} + \text{H}]^+$ : 233.1073; Found: 233.1075.

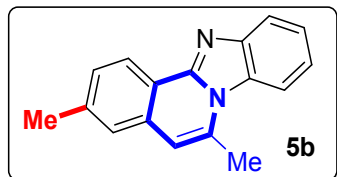

**3,6-Dimethylbenzo[4,5]imidazo[2,1-*a*]isoquinoline (5b)** was obtained as a yellow solid (47 mg, 95%), m.p. = 166–168 °C;  $^1\text{H NMR}$  (500 MHz,  $\text{CDCl}_3$ )  $\delta$  8.64 (d,  $J = 8.2$  Hz, 1H), 7.99 (d,  $J = 8.1$  Hz, 1H), 7.94 (d,  $J = 8.4$  Hz, 1H), 7.45 (t,  $J = 7.6$  Hz, 1H), 7.38 (d,  $J = 8.1$  Hz, 1H), 7.31–7.22 (m, 2H), 6.52 (s, 1H), 2.85 (s, 3H), 2.46 (s, 3H).  $^{13}\text{C NMR}$  (126 MHz,  $\text{CDCl}_3$ )  $\delta$  148.3, 144.1, 140.0, 134.5, 131.7, 131.1, 128.5, 125.4, 124.6, 123.9, 121.2, 119.6, 119.5, 113.7, 110.5, 21.7, 21.1. **HRMS (ESI) calcd for**  $\text{C}_{17}\text{H}_{15}\text{N}_2^+$   $[\text{M} + \text{H}]^+$ : 247.1230; Found: 247.1231.

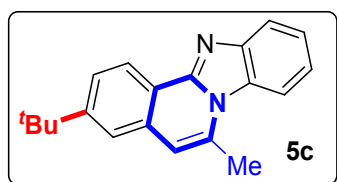

**3-(*tert*-butyl)-6-Methylbenzo[4,5]imidazo[2,1-*a*]isoquinoline (5c)** was obtained as a yellow solid (53 mg, 92%), m.p. = 166–168 °C;  $^1\text{H NMR}$  (500 MHz,  $\text{CDCl}_3$ )  $\delta$  8.74 (d,  $J = 8.5$  Hz, 1H), 8.00 (d,  $J = 8.3$  Hz, 2H), 7.69 (dd,  $J = 8.5, 1.9$  Hz, 1H), 7.58 (d,  $J = 1.7$  Hz, 1H), 7.45 (dd,  $J = 11.3, 4.1$  Hz, 1H), 7.33–7.17 (m, 1H), 6.71 (s, 1H), 2.93 (s, 3H), 1.43 (s, 9H).  $^{13}\text{C NMR}$  (126 MHz,  $\text{CDCl}_3$ )  $\delta$  153.6, 147.9, 143.3, 134.5, 131.8, 130.9, 125.6, 124.8, 124.3, 121.8, 121.6, 119.3, 119.2, 113.9, 111.6, 35.2, 31.3, 21.2. **HRMS (ESI) calcd for**  $\text{C}_{20}\text{H}_{21}\text{N}_2^+$   $[\text{M} + \text{H}]^+$ : 289.1699; Found: 289.1698.

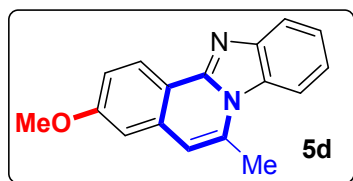

**3-Methoxy-6-methylbenzo[4,5]imidazo[2,1-*a*]isoquinoline (5d)** was obtained as a yellow solid (52 mg, 99%), m.p. = 166–168 °C;  $^1\text{H NMR}$  (500 MHz,  $\text{CDCl}_3$ )  $\delta$  8.60 (d,  $J = 8.8$  Hz, 1H), 7.94 (d,  $J = 8.1$  Hz, 1H), 7.85 (d,  $J = 8.4$  Hz, 1H), 7.41 (dd,  $J = 11.3, 3.9$  Hz, 1H), 7.24–7.17 (m, 1H), 7.10 (dd,  $J = 8.8, 2.4$  Hz, 1H), 6.76 (d,  $J = 2.4$  Hz, 1H), 6.44 (s, 1H), 3.79 (s, 3H), 2.77 (s, 3H).  $^{13}\text{C NMR}$  (126 MHz,  $\text{CDCl}_3$ )  $\delta$  160.8, 148.2, 143.9, 135.0, 133.4, 130.9, 126.5, 124.0, 121.0, 119.1, 116.5, 115.5, 113.6, 110.5, 106.7, 55.2, 21.0. **HRMS (ESI) calcd for  $\text{C}_{17}\text{H}_{15}\text{N}_2\text{O}^+$  [M + H] $^+$ :** 263.1179; Found: 263.1178.

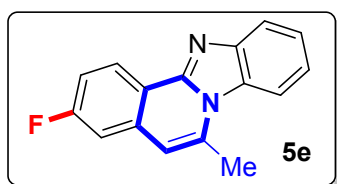

**3-Fluoro-6-methylbenzo[4,5]imidazo[2,1-*a*]isoquinoline (5e)** was obtained as a yellow solid (44 mg, 88%), m.p. = 166–168 °C;  $^1\text{H NMR}$  (500 MHz,  $\text{CDCl}_3$ )  $\delta$  8.74 (dd,  $J = 8.8, 5.6$  Hz, 1H), 7.97 (d,  $J = 8.7$  Hz, 2H), 7.47 (t,  $J = 7.8$  Hz, 1H), 7.28 (m, 2H), 7.19 (dd,  $J = 9.3, 2.4$  Hz, 1H), 6.59 (s, 1H), 2.91 (s, 3H).  $^{13}\text{C NMR}$  (126 MHz,  $\text{CDCl}_3$ )  $\delta$  163.5 (d,  $J = 250.0$  Hz), 147.7, 144.0, 136.0, 133.5 (d,  $J = 9.8$  Hz), 131.1, 127.5 (d,  $J = 9.4$  Hz), 124.3, 121.7, 119.7, 118.6, 115.7 (d,  $J = 23.7$  Hz), 113.8, 110.6 (d,  $J = 22.0$  Hz), 109.9 (d,  $J = 3.3$  Hz), 21.1. **HRMS (ESI) calcd for  $\text{C}_{17}\text{H}_{15}\text{N}_2\text{F}^+$  [M + H] $^+$ :** 251.0979; Found: 251.0977.

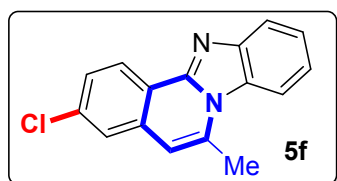

**3-Chloro-6-methylbenzo[4,5]imidazo[2,1-*a*]isoquinoline (5f)** was obtained as a yellow solid (51 mg, 95%), m.p. = 166–168 °C;  $^1\text{H NMR}$  (500 MHz,  $\text{CDCl}_3$ )  $\delta$  8.64 (d,  $J = 9.2$  Hz, 1H), 7.96 (dd,  $J = 12.6, 8.3$  Hz, 2H), 7.52–7.44 (m, 3H), 7.30 (t,  $J = 7.8$  Hz, 1H), 6.52 (s, 1H), 2.88 (s, 3H).  $^{13}\text{C NMR}$  (126 MHz,  $\text{CDCl}_3$ )  $\delta$  147.4, 144.0, 136.0, 135.9, 132.7, 131.0, 127.5, 126.4, 124.9, 124.4, 121.9, 120.2, 119.8, 113.8, 109.5, 21.2. **HRMS (ESI) calcd for  $\text{C}_{17}\text{H}_{15}\text{N}_2\text{Cl}^+$  [M + H] $^+$ :** 267.0684; Found: 267.0682.

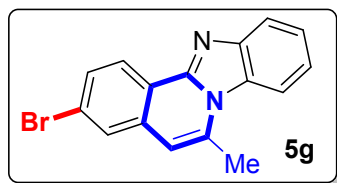

**3-Bromo-6-methylbenzo[4,5]imidazo[2,1-*a*]isoquinoline (5g)** was obtained as a yellow solid (56 mg, 91%), m.p. = 166–168 °C;  $^1\text{H NMR}$  (500 MHz,  $\text{CDCl}_3$ )  $\delta$  8.55 (d,  $J = 8.5$  Hz, 1H), 7.94 (dd,  $J = 20.1, 8.3$  Hz, 2H), 7.65–7.59 (m, 2H), 7.51–7.43 (m, 1H), 7.32–7.26 (m, 1H), 6.47 (d,  $J = 7.5$  Hz, 1H), 2.85 (s, 3H).  $^{13}\text{C NMR}$  (126 MHz,  $\text{CDCl}_3$ )  $\delta$  147.3, 143.9, 135.9, 132.8, 130.9, 130.1, 127.9, 126.3, 124.3, 124.2, 121.8, 120.4, 119.7, 113.8, 109.3, 21.1.  $\text{C}_{17}\text{H}_{15}\text{N}_2\text{Br}^+$   $[\text{M} + \text{H}]^+$ : 311.0178; Found: 311.0179.

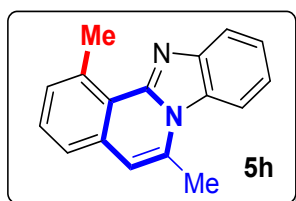

**1,6-Dimethylbenzo[4,5]imidazo[2,1-*a*]isoquinoline (5h)** was obtained as a yellow solid (44 mg, 90%), m.p. = 166–168 °C;  $^1\text{H NMR}$  (500 MHz,  $\text{CDCl}_3$ )  $\delta$  8.05 (t,  $J = 8.0$  Hz, 2H), 7.51–7.42 (m, 2H), 7.43–7.36 (m, 2H), 7.33 (dd,  $J = 11.8, 4.4$  Hz, 1H), 6.63 (s, 1H), 3.27 (s, 3H), 2.91 (s, 3H).  $^{13}\text{C NMR}$  (126 MHz,  $\text{CDCl}_3$ )  $\delta$  148.8, 144.1, 138.4, 134.2, 132.9, 130.3, 129.6, 128.8, 123.6, 123.6, 121.5, 121.05, 120.11, 113.7, 111.5, 24.5, 21.2. **HRMS (ESI) calcd for  $\text{C}_{17}\text{H}_{15}\text{N}_2\text{O}^+$   $[\text{M} + \text{H}]^+$ : 247.1230; Found: 247.1233.**

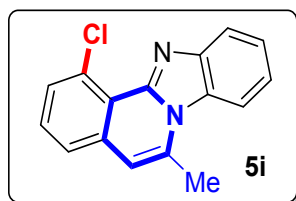

**1-Chloro-6-methylbenzo[4,5]imidazo[2,1-*a*]isoquinoline (5i)** was obtained as a yellow solid (52 mg, 98%), m.p. = 166–168 °C;  $^1\text{H NMR}$  (500 MHz,  $\text{CDCl}_3$ )  $\delta$  8.13 (d,  $J = 8.2$  Hz, 1H), 8.01 (d,  $J = 8.4$  Hz, 1H), 7.60 (dd,  $J = 7.0, 1.8$  Hz, 1H), 7.48 (t,  $J = 7.6$  Hz, 1H), 7.45–7.38 (m, 2H), 7.33 (t,  $J = 7.7$  Hz, 1H), 6.64 (s, 1H), 2.93 (s, 3H).  $^{13}\text{C NMR}$  (126 MHz,  $\text{CDCl}_3$ )  $\delta$  145.9, 143.8, 135.5, 134.1, 132.1, 130.1, 129.8, 129.3,

124.6, 124.1, 122.3, 120.8, 119.5, 113.7, 110.9, 21.3. **HRMS (ESI) calcd for**  $C_{16}H_{12}ClN_2^+$   $[M + H]^+$ : 267.0684; Found: 267.0686.

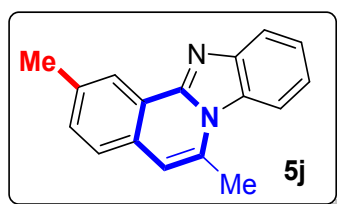

**2,6-Dimethylbenzo[4,5]imidazo[2,1-*a*]isoquinoline (5j)** was obtained as a yellow solid (42 mg, 85%), m.p. = 166–168 °C;  $^1H$  NMR (500 MHz,  $CDCl_3$ )  $\delta$  8.57 (s, 1H), 7.99 (dd,  $J$  = 15.2, 8.3 Hz, 2H), 7.48–7.43 (m, 2H), 7.37 (dd,  $J$  = 8.1, 1.3 Hz, 1H), 7.27 (ddd,  $J$  = 7.2, 4.5, 1.2 Hz, 1H), 6.59 (s, 1H), 2.87 (s, 3H), 2.53 (s, 3H).  $^{13}C$  NMR (126 MHz,  $CDCl_3$ )  $\delta$  148.1, 143.9, 137.1, 133.6, 131.4, 131.2, 129.4, 125.5, 124.5, 124.0, 121.8, 121.4, 119.6, 113.8, 110.6, 21.5, 21.0. **HRMS (ESI) calcd for**  $C_{17}H_{15}N_2^+$   $[M + H]^+$ : 247.1230; Found: 247.1235.

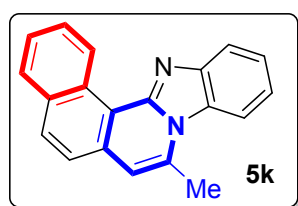

**8-methylbenzo[*h*]benzo[4,5]imidazo[2,1-*a*]isoquinoline (5k)** was obtained as a white solid (42 mg, 75%), m.p. = 166–168 °C;  $^1H$  NMR (500 MHz,  $CDCl_3$ )  $\delta$  10.91 (d,  $J$  = 8.5 Hz, 1H), 8.15 (dd,  $J$  = 16.4, 8.2 Hz, 2H), 8.01–7.87 (m, 3H), 7.68 (ddd,  $J$  = 8.0, 6.9, 1.1 Hz, 1H), 7.59–7.51 (m, 2H), 7.36 (ddd,  $J$  = 8.3, 7.1, 1.2 Hz, 1H), 6.84 (s, 1H), 3.03 (s, 3H).  $^{13}C$  NMR (126 MHz,  $CDCl_3$ )  $\delta$  148.4, 144.6, 135.6, 132.4, 131.9, 131.0, 130.1, 130.0, 128.5, 128.3, 128.1, 126.3, 124.4, 124.3, 121.4, 120.1, 116.8, 114.1, 111.8, 21.4. **HRMS (ESI) calcd for**  $C_{20}H_{15}N_2^+$   $[M + H]^+$ : 283.1230; Found: 283.1228.

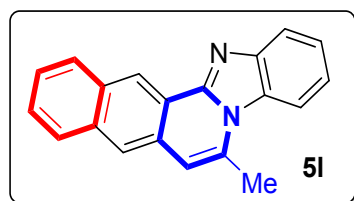

**6-Methylbenzo[*g*]benzo[4,5]imidazo[2,1-*a*]isoquinoline (5l)** was obtained as a yellow solid (30 mg, 54%), m.p. = 166–168 °C;  $^1\text{H NMR}$  (500 MHz,  $\text{CDCl}_3$ )  $\delta$  9.29 (s, 1H), 8.07 (dd,  $J = 6.0, 3.4$  Hz, 1H), 8.02 (*d*,  $J = 8.1$  Hz, 1H), 7.97–7.91 (m, 2H), 7.85 (dd,  $J = 5.9, 3.5$  Hz, 1H), 7.54–7.48 (m, 2H), 7.46 (t,  $J = 7.6$  Hz, 1H), 7.34–7.28 (m, 1H), 6.69 (s, 1H), 2.89 (s, 3H);  $^{13}\text{C NMR}$  (126 MHz,  $\text{CDCl}_3$ )  $\delta$  148.3, 143.8, 133.9, 133.9, 132.0, 131.7, 128.9, 128.7, 127.6, 127.0, 126.0, 124.7, 123.9, 123.8, 122.2, 120.6, 119.8, 113.6, 110.8, 21.2; **HRMS (ESI) calcd for  $\text{C}_{20}\text{H}_{15}\text{N}_2^+$  [M + H] $^+$** : 283.1230; Found: 283.1235.

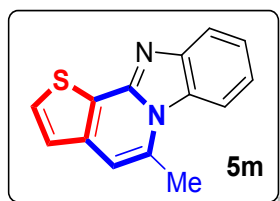

**5-Methylbenzo[4,5]imidazo[1,2-*a*]thieno[2,3-*c*]pyridine (5m)** was obtained as a yellow solid (39 mg, 81%), m.p. = 166–168 °C;  $^1\text{H NMR}$  (500 MHz,  $\text{CDCl}_3$ )  $\delta$  8.02 (*d*,  $J = 8.4$  Hz, 1H), 7.96 (*d*,  $J = 8.2$  Hz, 1H), 7.59 (*d*,  $J = 5.1$  Hz, 1H), 7.46 (t,  $J = 7.6$  Hz, 1H), 7.30–7.20 (m, 2H), 6.84 (s, 1H), 2.95 (s, 3H);  $^{13}\text{C NMR}$  (126 MHz,  $\text{CDCl}_3$ )  $\delta$  145.7, 144.5, 139.0, 135.0, 130.7, 129.7, 124.6, 124.3, 123.9, 121.0, 119.3, 114.1, 107.2, 21.2; **HRMS (ESI) calcd for  $\text{C}_{14}\text{H}_{11}\text{SN}_2^+$  [M + H] $^+$** : 239.0637; Found: 239.0638.

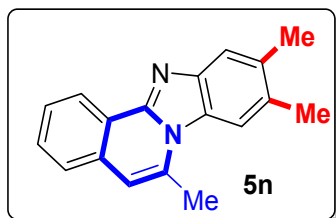

**6,9,10-Trimethylbenzo[4,5]imidazo[2,1-*a*]isoquinoline (5n)** was obtained as a yellow solid (28 mg, 54%), m.p. = 166–168 °C;  $^1\text{H NMR}$  (500 MHz,  $\text{CDCl}_3$ )  $\delta$  8.77 (*d*,  $J = 3.5$  Hz, 1H), 7.74 (*d*,  $J = 8.0$  Hz, 2H), 7.63–7.48 (m, 3H), 6.64 (s, 1H), 2.91 (s, 3H), 2.42 (s, 3H), 2.39 (s, 3H);  $^{13}\text{C NMR}$  (126 MHz,  $\text{CDCl}_3$ )  $\delta$  142.7, 134.7, 133.2, 131.5, 130.7, 129.4, 126.9, 125.6, 124.7, 122.2, 119.6, 113.9, 110.2, 21.2, 20.8, 20.4; **HRMS (ESI) calcd for  $\text{C}_{18}\text{H}_{17}\text{N}_2^+$  [M + H] $^+$** : 261.1386; Found: 261.1389.



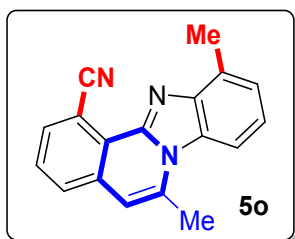

**6,11-Dimethylbenzo[4,5]imidazo[2,1-*a*]isoquinoline-1-carbonitrile (5o)** was obtained as a yellow solid (54 mg, 99%), m.p. = 166–168 °C;  $^1\text{H NMR}$  (500 MHz, Acetone)  $\delta$  8.14–8.03 (m, 3H), 7.83 (t,  $J$  = 7.7 Hz, 1H), 7.42–7.27 (m, 2H), 7.08 (d,  $J$  = 0.9 Hz, 1H), 3.12 (s, 3H), 2.81 (s, 3H);  $^{13}\text{C NMR}$  (126 MHz, Acetone)  $\delta$  145.1, 139.3, 136.1, 134.5, 132.2, 131.8, 130.8, 126.0, 124.3, 123.3, 119.8, 113.7, 111.3, 110.3, 21.9, 17.6; **HRMS (ESI) calcd for**  $\text{C}_{18}\text{H}_{14}\text{N}_2^+$   $[\text{M} + \text{H}]^+$ : 272.1182; Found: 272.1185.

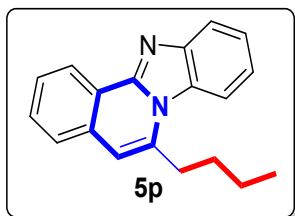

**6-Butylbenzo[4,5]imidazo[2,1-*a*]isoquinoline (5p)** was obtained as a white solid (43 mg, 79%), m.p. = 166–168 °C;  $^1\text{H NMR}$  (500 MHz,  $\text{CDCl}_3$ )  $\delta$  8.87–8.74 (m, 1H), 8.03 (d,  $J$  = 8.1 Hz, 1H), 7.92 (d,  $J$  = 8.4 Hz, 1H), 7.59 (dd,  $J$  = 6.7, 2.4 Hz, 3H), 7.48 (t,  $J$  = 7.6 Hz, 1H), 7.34 (t,  $J$  = 7.5 Hz, 1H), 6.71 (s, 1H), 3.53–2.93 (m, 2H), 1.96–1.76 (m, 2H), 1.64–1.52 (m, 2H), 1.02 (t,  $J$  = 7.4 Hz, 3H).  $^{13}\text{C NMR}$  (126 MHz,  $\text{CDCl}_3$ )  $\delta$  148.2, 143.7, 138.9, 131.6, 130.5, 130.0, 127.1, 125.8, 125.0, 124.2, 121.9, 121.8, 119.7, 114.2, 109.7, 33.0, 29.3, 22.3, 13.9. **HRMS (ESI) calcd for**  $\text{C}_{19}\text{H}_{19}\text{N}_2^+$   $[\text{M} + \text{H}]^+$ : 275.1543; Found: 275.1544.

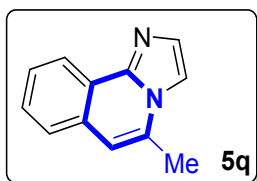

**5-Methylimidazo[2,1-*a*]isoquinoline (5q)** was obtained as a white solid (21 mg, 58%);  $^1\text{H NMR}$  (500 MHz,  $\text{CDCl}_3$ )  $\delta$  8.64 (d,  $J$  = 7.9 Hz, 1H), 7.64 (dd,  $J$  = 8.4, 0.9 Hz, 2H), 7.61–7.51 (m, 3H), 6.87 (s, 1H), 2.60 (s, 3H).  $^{13}\text{C NMR}$  (126 MHz,

$\text{CDCl}_3$ )  $\delta$  143.3, 131.5, 131.1, 129.9, 128.2, 127.3, 126.1, 123.2, 122.3, 111.6, 111.4, 18.6. **HRMS (ESI) calcd for  $\text{C}_{12}\text{H}_{11}\text{N}_2^+$   $[\text{M} + \text{H}]^+$ : 183.0917; Found: 183.0919.**

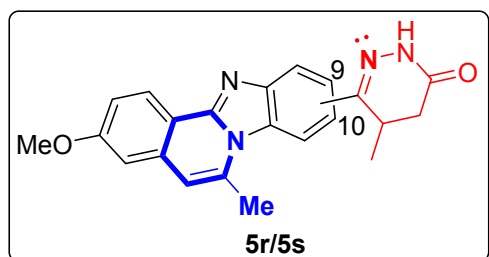

**6-(3-Methoxy-6-methylbenzo[4,5]imidazo[2,1-*a*]isoquinolin-10-yl)-5-methyl-4,5-dihydropyridazin-3(2*H*)-one (5r) and 6-(3-Methoxy-6-methylbenzo[4,5]imidazo[2,1-*a*]isoquinolin-9-yl)-5-methyl-4,5-dihydropyridazin-3(2*H*)-one (5s)** was Yellow solid (49 mg, 66%);  $^1\text{H NMR}$  (500 MHz,  $\text{CDCl}_3$ )  $\delta$  [9.06 (s) + 9.01 (s), 1H], 8.76, (t, 1H), [8.55 (s) + 8.29 (s), 1H], 8.03 (dd,  $J = 29.8, 8.7$  Hz, 1H), 7.87 (dd,  $J = 37.6, 8.7$  Hz, 1H), 7.27–7.12 (m, 1H), 7.01 (dd,  $J = 11.0, 2.2$  Hz, 1H), 6.76 (d,  $J = 15.1$  Hz, 1H), [3.95 (s) + 3.94 (s), 3H], 3.61–3.45 (m, 1H), [3.03 (s) + 3.02 (s), 3H], 2.82 (ddd,  $J = 16.8, 6.7, 3.0$  Hz, 1H), 2.56 (d,  $J = 15$  Hz, 1H), 1.38–1.31 (m, 3H).  $^{13}\text{C NMR}$  (126 MHz,  $\text{CDCl}_3$ )  $\delta$  166.9, 166.8, 161.6, 161.5, 154.6, 154.1, 149.6, 148.9, 135.2, 135.0, 134.0, 133.8, 131.6, 127.78, 127.0, 122.4, 119.5, 118.8, 117.2, 117.2, 116.8, 114.2, 111.7, 111.6, 111.5, 107.2, 107.0, 55.5, 34.0 28.6, 28.3, 22.6, 21.3, 21.2, 16.5, 14.1. **HRMS (ESI) calcd for  $\text{C}_{22}\text{H}_{21}\text{N}_4\text{O}_2^+$   $[\text{M} + \text{H}]^+$ : 373.1659; Found: 373.1658.**

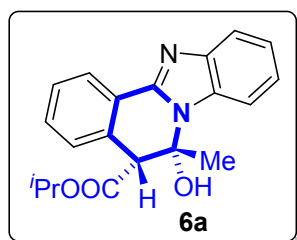

**Isopropyl 6-hydroxy-6-methyl-5,6-dihydrobenzo[4,5]imidazo[2,1-*a*]isoquinoline-5-carboxylate (6a)** was obtained as a white solid (62 mg, 92%), m. p. = 140–142;  $^1\text{H NMR}$  (500 MHz,  $\text{CDCl}_3$ )  $\delta$  8.31–8.23 (m, 1H), 8.09–7.96 (m, 1H), 7.78 (dt,  $J = 4.6, 2.8$  Hz, 1H), 7.51–7.36 (m, 3H), 7.31–7.23 (m, 2H), 6.13 (s, 1H), 4.88 (hept,  $J = 6.2$  Hz, 1H), 4.04 (s, 1H), 1.62 (s, 3H), 1.17 (d,  $J = 6.2$  Hz, 3H), 0.91 (d,  $J = 6.2$  Hz, 3H).  $^{13}\text{C NMR}$  (126 MHz,  $\text{CDCl}_3$ )  $\delta$  170.8, 147.7, 144.2, 133.7, 131.0, 130.2, 130.1, 129.1, 128.9, 126.7, 125.9, 125.2, 123.2, 122.6, 119.6, 113.4, 87.2, 70.2, 55.5, 26.6, 21.4, 21.1. **HRMS (ESI) calcd for  $\text{C}_{20}\text{H}_{21}\text{N}_2\text{O}_3^+$   $[\text{M} + \text{H}]^+$ : 337.1547; Found: 337.1548.**

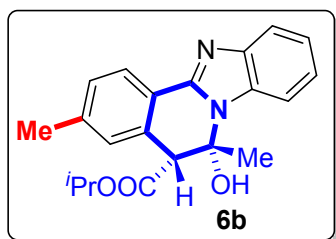

**Isopropyl 6-hydroxy-3,6-dimethyl-5,6-dihydrobenzo[4,5]imidazo[2,1-*a*]isoquinoline-5-carboxylate (6b)** was obtained as white solid (48 mg, 68%), m. p. = 144–145;  $^1\text{H NMR}$  (500 MHz,  $\text{CDCl}_3$ )  $\delta$  8.14 (d,  $J = 8.3$  Hz, 1H), 8.01 (dd,  $J = 6.6$ , 2.3 Hz, 1H), 7.77 (dd,  $J = 6.5$ , 2.2 Hz, 1H), 7.31–7.20 (m, 4H), 6.14 (s, 1H), 4.92–4.80 (m, 1H), 3.98 (s, 1H), 2.42 (s, 3H), 1.59 (s, 3H), 1.16 (d,  $J = 6.2$  Hz, 3H), 0.91 (d,  $J = 6.2$  Hz, 3H);  $^{13}\text{C NMR}$  (126 MHz,  $\text{CDCl}_3$ )  $\delta$  170.8, 148.0, 144.1, 140.5, 133.6, 131.0, 130.6, 129.9, 125.8, 122.9, 122.5, 122.4, 119.4, 113.2, 87.1, 70.0, 55.6, 26.6, 21.5, 21.4, 21.1. **HRMS (ESI) calcd for  $\text{C}_{21}\text{H}_{23}\text{N}_2\text{O}_3^+$   $[\text{M} + \text{H}]^+$ : 351.1703; Found: 351.1709.**

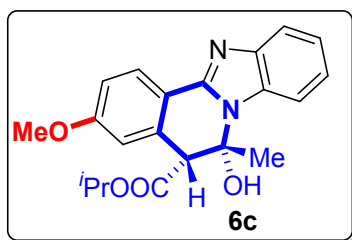

**Isopropyl 6-hydroxy-3-methoxy-6-methyl-5,6-dihydrobenzo[4,5]imidazo[2,1-*a*]isoquinoline-5-carboxylate (6c)** was obtained as white solid (53 mg, 73%), m. p. = 159–162;  $^1\text{H NMR}$  (500 MHz,  $\text{CDCl}_3$ )  $\delta$  8.21 (d,  $J = 8.2$  Hz, 1H), 7.99 (d,  $J = 7.3$  Hz, 1H), 7.76 (d,  $J = 7.3$  Hz, 1H), 7.23 (m,  $J = 13.4$ , 6.3 Hz, 2H), 7.04–6.93 (m, 2H), 5.94 (s, 1H), 4.96–4.72 (m, 1H), 3.97 (s, 1H), 3.88 (s, 3H), 1.59 (s, 3H), 1.17 (d,  $J = 6.2$  Hz, 3H), 0.94 (d,  $J = 6.2$  Hz, 3H);  $^{13}\text{C NMR}$  (126 MHz,  $\text{CDCl}_3$ )  $\delta$  170.6, 161.0, 147.9, 143.9, 133.5, 132.8, 127.8, 122.8, 122.4, 119.1, 117.9, 115.6, 114.5, 113.1, 87.1, 70.1, 55.8, 55.5, 26.5, 21.5, 21.2. **HRMS (ESI) calcd for  $\text{C}_{21}\text{H}_{23}\text{N}_2\text{O}_4^+$   $[\text{M} + \text{H}]^+$ : 367.1652; Found: 367.1657.**

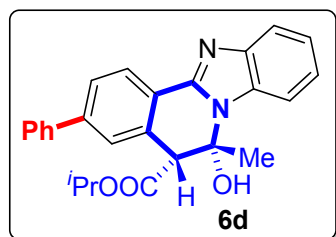

**Isopropyl 6-hydroxy-6-methyl-3-phenyl-5,6-dihydrobenzo[4,5]imidazo[2,1-*a*]isoquinoline-5-carboxylate (6d)** was obtained as a white solid (73 mg, 88%), m. p. = 150–152;  $^1\text{H NMR}$  (500 MHz,  $\text{CDCl}_3$ )  $\delta$  8.34 (d,  $J = 8.6$  Hz, 1H), 8.05 (dd,  $J = 6.2$ , 2.6 Hz, 1H), 7.81 (dd,  $J = 6.1$ , 2.5 Hz, 1H), 7.68 (dd,  $J = 21.1$ , 7.1 Hz, 4H), 7.50 (t,  $J = 7.6$  Hz, 2H), 7.42 (t,  $J = 7.3$  Hz, 1H), 7.29 (dd,  $J = 9.3$ , 5.7 Hz, 2H), 6.20 (s, 1H), 4.97–4.81 (m, 1H), 4.12 (s, 1H), 1.66 (s, 3H), 1.19 (d,  $J = 6.2$  Hz, 3H), 0.94 (d,  $J = 6.2$  Hz, 3H);  $^{13}\text{C NMR}$  (126 MHz,  $\text{CDCl}_3$ )  $\delta$  170.7, 147.6, 144.2, 142.9, 139.7, 133.7, 131.5, 129.0, 128.7, 128.0, 127.8, 127.0, 126.4, 124.0, 123.2, 122.6, 119.5, 113.3, 87.2, 70.2, 55.7, 26.7, 21.5, 21.2. **HRMS (ESI) calcd for  $\text{C}_{26}\text{H}_{25}\text{N}_2\text{O}_3^+$   $[\text{M} + \text{H}]^+$ :** 413.1860; Found: 413.1864.

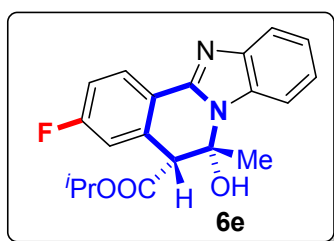

**Isopropyl 3-fluoro-6-hydroxy-6-methyl-5,6-dihydrobenzo[4,5]imidazo[2,1-*a*]isoquinoline-5-carboxylate (6e)** was obtained as a white solid (46 mg, 65%), m. p. = 126–128;  $^1\text{H NMR}$  (500 MHz,  $\text{CDCl}_3$ )  $\delta$  8.26 (dd,  $J = 8.5$ , 5.6 Hz, 1H), 8.11–7.89 (m, 1H), 7.84–7.72 (m, 1H), 7.32–7.22 (m, 2H), 7.17 (ddd,  $J = 17.0$ , 8.6, 2.5 Hz, 2H), 6.22 (s, 1H), 5.00–4.76 (m, 1H), 4.00 (s, 1H), 1.60 (s, 3H), 1.18 (d,  $J = 6.2$  Hz, 3H), 0.94 (d,  $J = 6.2$  Hz, 3H);  $^{13}\text{C NMR}$  (126 MHz,  $\text{CDCl}_3$ )  $\delta$  170.2, 163.4 (d,  $J = 251.6$  Hz), 146.9, 144.0, 133.6, 133.4 (d,  $J = 8.6$  Hz), 128.2 (d,  $J = 8.8$  Hz), 123.3, 122.7, 121.7 (d,  $J = 3.0$  Hz), 119.5, 117.1 (d,  $J = 23.1$  Hz), 116.5 (d,  $J = 22.0$  Hz), 113.3, 87.1, 70.5, 55.3, 26.7, 21.4, 21.1. **HRMS (ESI) calcd for  $\text{C}_{20}\text{H}_{20}\text{N}_2\text{FO}_3^+$   $[\text{M} + \text{H}]^+$ :** 355.1452; Found: 355.1456.

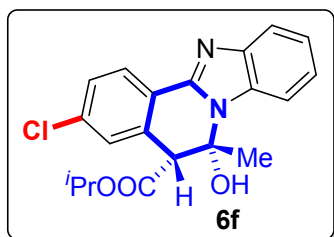

**Isopropyl 3-chloro-6-hydroxy-6-methyl-5,6-dihydrobenzo[4,5]imidazo[2,1-*a*]isoquinoline-5-carboxylate (6f)** was obtained as a white solid (55 mg, 74%), m. p. = 111–112;  $^1\text{H NMR}$  (500 MHz,  $\text{CDCl}_3$ )  $\delta$  8.20 (d,  $J = 8.3$  Hz, 1H), 8.04–7.97 (m, 1H), 7.81–7.74 (m, 1H), 7.46 (d,  $J = 1.9$  Hz, 1H), 7.43 (dd,  $J = 8.3, 2.0$  Hz, 1H), 7.32–7.23 (m, 2H), 6.21 (s, 1H), 4.94–4.83 (m, 1H), 3.99 (s, 1H), 1.60 (s, 3H), 1.18 (d,  $J = 6.2$  Hz, 3H), 0.94 (d,  $J = 6.2$  Hz, 3H);  $^{13}\text{C NMR}$  (126 MHz,  $\text{CDCl}_3$ )  $\delta$  170.3, 146.8, 144.0, 135.8, 133.6, 132.6, 130.1, 129.4, 127.2, 123.8, 123.5, 122.8, 119.6, 113.4, 87.2, 70.6, 55.1, 26.7, 21.4, 21.1; **HRMS (ESI) calcd for  $\text{C}_{20}\text{H}_{20}\text{N}_2\text{ClO}_3^+$   $[\text{M} + \text{H}]^+$ :** 371.1157; Found: 371.1157.

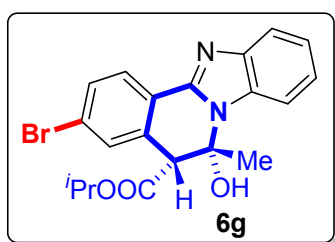

**Isopropyl 3-bromo-6-hydroxy-6-methyl-5,6-dihydrobenzo[4,5]imidazo[2,1-*a*]isoquinoline-5-carboxylate (6g)** was obtained as a white solid (46 mg, 56%), m. p. = 108–109;  $^1\text{H NMR}$  (500 MHz,  $\text{CDCl}_3$ )  $\delta$  8.11 (d,  $J = 8.3$  Hz, 1H), 8.04–7.99 (m, 1H), 7.80–7.73 (m, 1H), 7.62 (d,  $J = 1.6$  Hz, 1H), 7.57 (dd,  $J = 8.3, 1.8$  Hz, 1H), 7.31–7.23 (m, 2H), 6.25 (s, 1H), 4.93–4.83 (m, 1H), 3.98 (s, 1H), 1.60 (s, 3H), 1.18 (d,  $J = 6.2$  Hz, 3H), 0.94 (d,  $J = 6.2$  Hz, 3H);  $^{13}\text{C NMR}$  (126 MHz,  $\text{CDCl}_3$ )  $\delta$  170.2, 146.8, 144.0, 133.6, 133.0, 132.8, 132.3, 127.3, 124.2, 124.0, 123.5, 122.8, 119.6, 113.4, 87.1, 70.5, 55.1, 26.7, 21.4, 21.1.  $\text{C}_{20}\text{H}_{20}\text{N}_2\text{BrO}_3^+$   $[\text{M} + \text{H}]^+$ : 415.0652; Found: 415.0658.

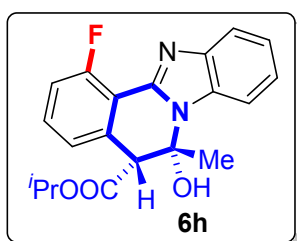

**Isopropyl 1-fluoro-6-hydroxy-6-methyl-5,6-dihydrobenzo[4,5]imidazo[2,1-*a*]isoquinoline-5-carboxylate (6h)** was as a white solid (45 mg, 63%), m. p. = 156–157;  $^1\text{H NMR}$  (500 MHz,  $\text{CDCl}_3$ )  $\delta$  8.03 (dd,  $J = 5.8, 3.1$  Hz, 1H), 7.87 (dd,  $J = 5.7, 3.1$  Hz, 1H), 7.39 (dd,  $J = 12.8, 7.8$  Hz, 1H), 7.31–7.14 (m, 4H), 6.24 (s, 1H), 4.92–4.77 (m, 1H), 4.03 (s, 1H), 1.60 (s, 3H), 1.13 (d,  $J = 6.2$  Hz, 3H), 0.87 (d,  $J = 6.2$  Hz, 3H);  $^{13}\text{C NMR}$  (126 MHz,  $\text{CDCl}_3$ )  $\delta$  170.5, 159.7 (d,  $J = 260.2$  Hz), 144.4, 143.7 (d,

$J = 7.3$  Hz), 133.6, 132.7, 130.9 (d,  $J = 9.1$  Hz), 126.1 (d,  $J = 3.5$  Hz), 123.6, 122.5, 120.3, 117.2 (d,  $J = 21.6$  Hz), 113.9 (d,  $J = 10.8$  Hz), 113.2, 87.0, 70.5, 55.6, 26.6, 21.3, 21.1. **HRMS (ESI) calcd for**  $C_{20}H_{20}N_2FO_3^+$   $[M + H]^+$ : 355.1452; Found: 355.1454.

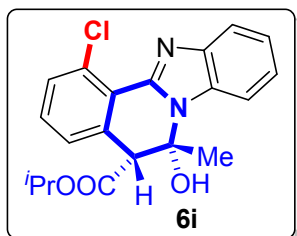

**Isopropyl 1-chloro-6-hydroxy-6-methyl-5,6-dihydrobenzo[4,5]imidazo[2,1- $\alpha$ ]isoquinoline-5-carboxylate (6i)** was obtained as a white solid (52 mg, 70%), m. p. = 263–265;  $^1H$  NMR (500 MHz,  $CDCl_3$ )  $\delta$  8.07–8.00 (m, 1H), 7.92–7.86 (m, 1H), 7.55 (dd,  $J = 7.7, 1.4$  Hz, 1H), 7.39–7.29 (m, 2H), 7.30–7.26 (m, 2H), 6.28 (s, 1H), 4.89–4.68 (m, 1H), 3.98 (s, 1H), 1.62 (s, 3H), 1.10 (d,  $J = 6.2$  Hz, 3H), 0.84 (d,  $J = 6.2$  Hz, 3H);  $^{13}C$  NMR (126 MHz,  $CDCl_3$ )  $\delta$  170.6, 144.9, 143.8, 134.1, 132.9, 132.7, 132.3, 129.8, 129.0, 123.8, 123.3, 122.4, 120.5, 113.1, 86.5, 70.6, 56.1, 26.6, 21.3, 21.1; **HRMS (ESI) calcd for**  $C_{20}H_{20}N_2ClO_3^+$   $[M + H]^+$ : 371.1157; Found: 371.1157.

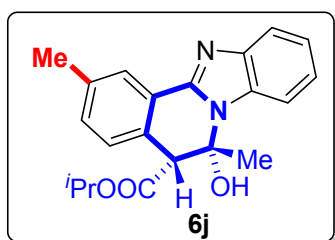

**Isopropyl 6-hydroxy-2,6-dimethyl-5,6-dihydrobenzo[4,5]imidazo[2,1- $\alpha$ ]isoquinoline-5-carboxylate (6j)** was obtained as a white solid (39 mg, 55%), m. p. = 163–165;  $^1H$  NMR (500 MHz,  $CDCl_3$ )  $\delta$  8.12 (s, 1H), 8.05–7.98 (m, 1H), 7.83–7.74 (m, 1H), 7.35 (d,  $J = 7.7$  Hz, 1H), 7.31–7.16 (m, 3H), 6.07 (s, 1H), 4.95–4.78 (m, 1H), 4.00 (s, 1H), 2.42 (s, 3H), 1.60 (s, 3H), 1.17 (d,  $J = 6.2$  Hz, 3H), 0.92 (d,  $J = 6.2$  Hz, 3H);  $^{13}C$  NMR (126 MHz,  $CDCl_3$ )  $\delta$  171.0, 147.9, 144.2, 139.1, 133.7, 131.0, 130.1, 128.0, 126.3, 124.9, 123.1, 122.5, 119.5, 113.3, 87.2, 70.0, 55.1, 26.6, 21.5, 21.17, 21.09; **HRMS (ESI) calcd for**  $C_{21}H_{23}N_2O_3^+$   $[M + H]^+$ : 351.1703; Found: 351.1704.

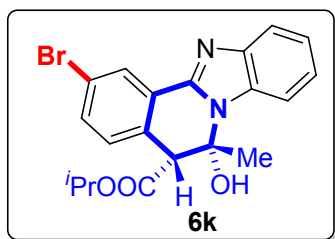

**Isopropyl 2-bromo-6-hydroxy-6-methyl-5,6-dihydrobenzo[4,5]imidazo[2,1-*a*]isoquinoline-5-carboxylate (6k)** was obtained as a white solid (52 mg, 63%), m. p. = 166–167;  $^1\text{H NMR}$  (500 MHz,  $\text{CDCl}_3$ )  $\delta$  8.46 (s, 1H), 8.08–7.97 (m, 1H), 7.83–7.74 (m, 1H), 7.54 (d,  $J = 7.7$  Hz, 1H), 7.34 (d,  $J = 8.1$  Hz, 1H), 7.31–7.27 (m, 2H), 6.15 (s, 1H), 5.01–4.73 (m, 1H), 4.00 (s, 1H), 1.60 (s, 3H), 1.18 (d,  $J = 6.1$  Hz, 3H), 0.94 (d,  $J = 6.1$  Hz, 3H);  $^{13}\text{C NMR}$  (126 MHz,  $\text{CDCl}_3$ )  $\delta$  170.4, 146.3, 144.1, 133.7, 132.9, 131.8, 129.8, 128.7, 127.0, 123.7, 123.2, 122.9, 119.8, 113.4, 87.2, 70.5, 54.9, 26.7, 21.5, 21.2; **HRMS (ESI) calcd for  $\text{C}_{20}\text{H}_{20}\text{N}_2\text{BrO}_3^+$   $[\text{M} + \text{H}]^+$ : 415.0652; Found: 415.0651.**

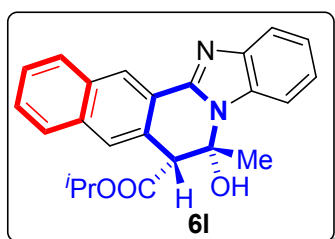

**Isopropyl 6-hydroxy-6-methyl-6,7-dihydrobenzo[g]benzo[4,5]imidazo[2,1-*a*]isoquinoline-7-carboxylate (6l)** was obtained as a yellow solid (31 mg, 40%), m. p. = 118–120;  $^1\text{H NMR}$  (500 MHz,  $\text{CDCl}_3$ )  $\delta$  8.84 (s, 1H), 8.06 (dd,  $J = 7.0, 1.7$  Hz, 1H), 8.00–7.94 (m, 1H), 7.93 (s, 1H), 7.89–7.85 (m, 1H), 7.83 (dd,  $J = 7.0, 1.8$  Hz, 1H), 7.60–7.51 (m, 2H), 7.30 (dt,  $J = 7.5, 5.7$  Hz, 2H), 6.15 (s, 1H), 4.91–4.82 (m, 1H), 4.23 (s, 1H), 1.64 (s, 3H), 1.14 (d,  $J = 6.2$  Hz, 3H), 0.84 (d,  $J = 6.2$  Hz, 3H);  $^{13}\text{C NMR}$  (126 MHz,  $\text{CDCl}_3$ )  $\delta$  171.1, 147.9, 144.4, 133.9, 133.8, 133.3, 129.5, 128.8, 128.2, 127.6, 127.5, 127.1, 126.1, 123.2, 122.7, 122.6, 119.6, 113.5, 87.3, 70.3, 56.1, 27.0, 21.4, 21.1; **HRMS (ESI) calcd for  $\text{C}_{24}\text{H}_{23}\text{N}_2\text{O}_3^+$   $[\text{M} + \text{H}]^+$ : 387.1703; Found: 387.1704.**

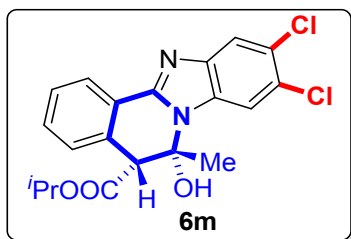

**Isopropyl 9,10-dichloro-6-hydroxy-6-methyl-5,6-dihydrobenzo[4,5]imidazo[2,1-*a*]isoquinoline-5-carboxylate (6m)** was obtained as a white solid (69 mg, 85%), m. p. = 155–157;  $^1\text{H NMR}$  (500 MHz,  $\text{CDCl}_3$ )  $\delta$  8.25–8.17 (m, 1H), 8.14 (s, 1H), 7.82 (s, 1H), 7.52–7.42 (m, 3H), 6.29 (s, 1H), 4.88 (hept,  $J = 6.2$  Hz, 1H), 4.04 (s, 1H), 1.59 (s, 3H), 1.17 (d,  $J = 6.2$  Hz, 3H), 0.90 (d,  $J = 6.2$  Hz, 3H);  $^{13}\text{C NMR}$  (126 MHz,  $\text{CDCl}_3$ )  $\delta$  170.7, 149.6, 143.5, 132.7, 131.2, 130.8, 130.4, 129.3, 127.0, 126.7, 126.1, 124.4, 120.4, 114.5, 87.4, 70.5, 55.2, 26.6, 21.4, 21.1. **HRMS (ESI) calcd for  $\text{C}_{20}\text{H}_{19}\text{N}_2\text{Cl}_2\text{O}_2^+$  [M + H] $^+$ : 405.0767; Found: 405.0766.**

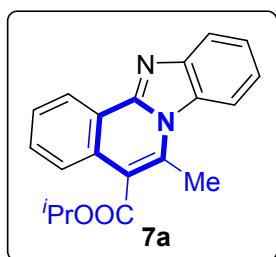

**Isopropyl 6-methylbenzo[4,5]imidazo[2,1-*a*]isoquinoline-5-carboxylate (7a)** was obtained as a yellow solid (32 mg, 50%), m. p. = 139–140;  $^1\text{H NMR}$  (500 MHz,  $\text{CDCl}_3$ )  $\delta$  8.94–8.79 (m, 1H), 8.12 (d,  $J = 8.4$  Hz, 1H), 8.04 (d,  $J = 8.1$  Hz, 1H), 7.76–7.62 (m, 3H), 7.56–7.49 (m, 1H), 7.38 (ddd,  $J = 8.4, 7.2, 1.2$  Hz, 1H), 5.48 (hept,  $J = 6.3$  Hz, 1H), 3.09 (s, 3H), 1.49 (d,  $J = 6.3$  Hz, 6H);  $^{13}\text{C NMR}$  (126 MHz,  $\text{CDCl}_3$ )  $\delta$  167.3, 147.6, 144.5, 134.3, 131.6, 130.4, 128.7, 127.7, 125.3, 124.7, 123.9, 122.1, 122.1, 120.2, 116.6, 114.4, 69.9, 21.9, 19.0. **HRMS (ESI) calcd for  $\text{C}_{20}\text{H}_{19}\text{N}_2\text{O}_2^+$  [M + H] $^+$ : 319.1441; Found: 319.1442.**

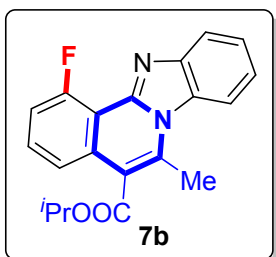

**Isopropyl 1-fluoro-6-methylbenzo[4,5]imidazo[2,1-*a*]isoquinoline-5-carboxylate (7b)** was obtained as a yellow solid (28 mg, 41%), m. p. = 135–139;  $^1\text{H NMR}$  (500 MHz,  $\text{CDCl}_3$ )  $\delta$  8.10 (dd,  $J = 18.1, 8.3$  Hz, 2H), 7.62 (m, 1H), 7.49 (m, 2H), 7.41–



7.31 (m, 2H), 5.55–5.40 (m, 1H), 3.06 (s, 3H), 1.48 (d,  $J = 6.3$  Hz, 6H);  $^{13}\text{C}$  NMR (126 MHz,  $\text{CDCl}_3$ )  $\delta$  167.0, 156.0 (d,  $J = 260.9$  Hz), 144.6, 143.8 (d,  $J = 8.3$  Hz), 135.2, 130.9, 130.8 (d,  $J = 9.2$  Hz), 130.4, 124.8, 122.7, 120.8, 119.6 (d,  $J = 4.2$  Hz), 116.3 (d,  $J = 2.4$  Hz), 114.4 (d,  $J = 21.0$  Hz), 114.2, 111.5 (d,  $J = 11.0$  Hz), 70.1, 21.8, 19.1; HRMS (ESI) calcd for  $\text{C}_{20}\text{H}_{18}\text{FN}_2\text{O}_2^+$  [ $\text{M} + \text{H}$ ] $^+$ : 337.1347; Found: 337.1346.

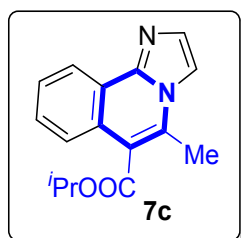

Isopropyl 5-methylimidazo[2,1-*a*]isoquinoline-6-carboxylate (**7c**) was obtained as a green oil (17 mg, 32%);  $^1\text{H}$  NMR (500 MHz,  $\text{CDCl}_3$ )  $\delta$  8.69–8.60 (m, 1H), 7.78–7.72 (m, 1H), 7.66 (d,  $J = 1.2$  Hz, 1H), 7.64–7.55 (m, 3H), 5.51–5.38 (m, 1H), 2.67 (s, 3H), 1.46 (d,  $J = 6.3$  Hz, 6H);  $^{13}\text{C}$  NMR (126 MHz,  $\text{CDCl}_3$ )  $\delta$  167.1, 143.0, 132.2, 131.0, 128.5, 127.8, 126.7, 124.1, 123.4, 122.4, 117.4, 112.1, 69.8, 21.9, 16.7; HRMS (ESI) calcd for  $\text{C}_{16}\text{H}_{17}\text{N}_2\text{O}_2^+$  [ $\text{M} + \text{H}$ ] $^+$ : 269.1285; Found: 269.1285.

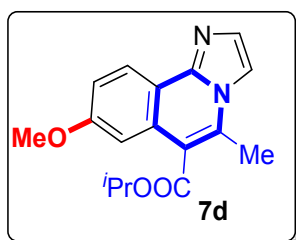

Isopropyl 8-methoxy-5-methylimidazo[2,1-*a*]isoquinoline-6-carboxylate (**7d**) was obtained as a yellow solid (24 mg, 40%), m. p. = 127–1128;  $^1\text{H}$  NMR (500 MHz,  $\text{CDCl}_3$ )  $\delta$  8.56 (d,  $J = 8.9$  Hz, 1H), 7.61 (d,  $J = 1.4$  Hz, 1H), 7.52 (d,  $J = 1.4$  Hz, 1H), 7.24 (dd,  $J = 8.9, 2.4$  Hz, 1H), 7.17 (d,  $J = 2.4$  Hz, 1H), 5.45 (hept,  $J = 6.3$  Hz, 1H), 3.90 (s, 3H), 2.66 (s, 3H), 1.46 (d,  $J = 6.3$  Hz, 6H);  $^{13}\text{C}$  NMR (126 MHz,  $\text{CDCl}_3$ )  $\delta$  167.1, 159.8, 143.2, 132.0, 131.9, 128.4, 125.1, 117.4, 116.9, 116.6, 111.5, 105.8, 69.6, 55.3, 21.9, 16.9; HRMS (ESI) calcd for  $\text{C}_{17}\text{H}_{19}\text{N}_2\text{O}_3^+$  [ $\text{M} + \text{H}$ ] $^+$ : 299.1390; Found: 299.1389.

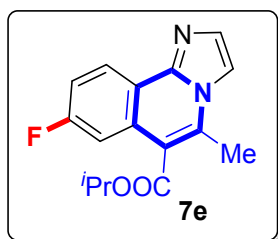

**Isopropyl 8-fluoro-5-methylimidazo[2,1-*a*]isoquinoline-6-carboxylate (7e)** was obtained as a yellow solid (36 mg, 62%), m. p. = 129–130;  $^1\text{H NMR}$  (500 MHz,  $\text{CDCl}_3$ )  $\delta$  8.65 (dd,  $J = 8.9, 5.8$  Hz, 1H), 7.64 (d,  $J = 1.1$  Hz, 1H), 7.57 (d,  $J = 1.2$  Hz, 1H), 7.46 (dd,  $J = 10.5, 2.4$  Hz, 1H), 7.35 (td,  $J = 8.5, 2.4$  Hz, 1H), 5.49–5.39 (m, 1H), 2.69 (s, 3H), 1.46 (d,  $J = 6.3$  Hz, 6H);  $^{13}\text{C NMR}$  (126 MHz,  $\text{CDCl}_3$ )  $\delta$  166.6, 162.5 (d,  $J = 247.6$  Hz), 142.7, 132.9, 132.4, 128.5 (d,  $J = 9.5$  Hz), 125.9 (d,  $J = 9.1$  Hz), 119.0 (d,  $J = 1.8$  Hz), 116.7, 116.7 (d,  $J = 3.6$  Hz), 116.5, 112.1, 109.8 (d,  $J = 24.1$  Hz), 70.1, 21.9, 16.9; **HRMS (ESI) calcd for  $\text{C}_{16}\text{H}_{16}\text{FN}_2\text{O}_2^+$  [ $\text{M} + \text{H}$ ] $^+$ :** 287.1190; Found: 287.1188.

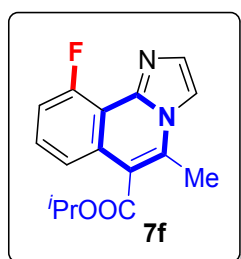

**Isopropyl 10-fluoro-5-methylimidazo[2,1-*a*]isoquinoline-6-carboxylate (7f)** was obtained as a yellow solid (33 mg, 58%), m. p. = 142–143;  $^1\text{H NMR}$  (500 MHz,  $\text{CDCl}_3$ )  $\delta$  7.76 (d,  $J = 1.3$  Hz, 1H), 7.60 (d,  $J = 1.0$  Hz, 1H), 7.51 (dd,  $J = 5.6, 3.4$  Hz, 2H), 7.38–7.30 (m, 1H), 5.52–5.31 (m, 1H), 2.66 (s, 3H), 1.44 (d,  $J = 6.3$  Hz, 6H);  $^{13}\text{C NMR}$  (126 MHz,  $\text{CDCl}_3$ )  $\delta$  166.7, 158.8 (d,  $J = 258.1$  Hz), 139.3 (d,  $J = 7.6$  Hz), 133.0 (d,  $J = 2.4$  Hz), 131.9 (s), 129.0 (d,  $J = 3.1$  Hz), 128.7 (d,  $J = 8.9$  Hz), 119.8 (d,  $J = 4.2$  Hz), 117.1 (d,  $J = 2.6$  Hz), 114.1 (d,  $J = 20.3$  Hz), 112.0, 111.9, 70.0, 21.8, 16.9; **HRMS (ESI) calcd for  $\text{C}_{16}\text{H}_{16}\text{FN}_2\text{O}_2^+$  [ $\text{M} + \text{H}$ ] $^+$ :** 287.1190; Found: 287.1193.

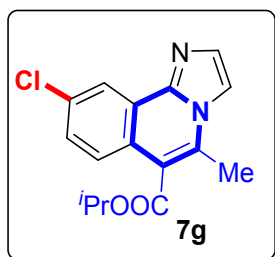

**Isopropyl 9-chloro-5-methylimidazo[2,1-*a*]isoquinoline-6-carboxylate (7f)** was obtained as a yellow solid (18 mg, 30%), m. p. = 139–140;  $^1\text{H NMR}$  (500 MHz,  $\text{CDCl}_3$ )  $\delta$  8.65 (d,  $J = 2.2$  Hz, 1H), 7.70 (dd,  $J = 9.4, 5.0$  Hz, 2H), 7.60 (d,  $J = 1.3$  Hz, 1H), 7.53 (dd,  $J = 8.8, 2.2$  Hz, 1H), 5.75–5.18 (m, 1H), 2.69 (s, 3H), 1.46 (d,  $J = 6.3$  Hz, 6H);  $^{13}\text{C NMR}$  (126 MHz,  $\text{CDCl}_3$ )  $\delta$  166.7, 141.8, 133.9, 132.5, 131.6, 129.1,

125.9, 125.1, 123.3, 122.9, 117.0, 112.6, 70.1, 21.9, 16.8; **HRMS (ESI) calcd for**  $C_{16}H_{16}ClN_2O_2^+$   $[M + H]^+$ : 303.0895; Found: 303.0896.

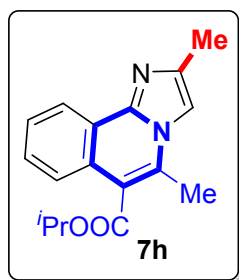

**Isopropyl 2,5-dimethylimidazo[2,1-*a*]isoquinoline-6-carboxylate (7h)** was obtained as a yellow solid (20 mg, 35%), m. p. = 117–118;  $^1H$  NMR (500 MHz,  $CDCl_3$ )  $\delta$  8.83–8.54 (m, 1H), 7.88–7.70 (m, 1H), 7.66–7.45 (m, 2H), 7.32 (d,  $J = 0.8$  Hz, 1H), 5.44 (hept,  $J = 6.3$  Hz, 1H), 2.64 (s, 3H), 2.52 (s, 3H), 1.45 (d,  $J = 6.3$  Hz, 6H);  $^{13}C$  NMR (126 MHz,  $CDCl_3$ )  $\delta$  167.2, 142.5, 142.0, 130.9, 128.3, 127.5, 126.7, 124.1, 123.3, 121.8, 116.7, 109.1, 69.7, 21.9, 16.8, 14.4; **HRMS (ESI) calcd for**  $C_{17}H_{18}N_2O_2^+$   $[M + H]^+$ : 283.1441; Found: 283.1443.

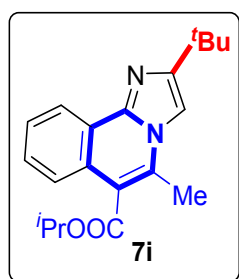

**Isopropyl 2-(*tert*-butyl)-5-methylimidazo[2,1-*a*]isoquinoline-6-carboxylate (7i)** was obtained as a yellow solid (34 mg, 53%), m. p. = 161–163;  $^1H$  NMR (500 MHz,  $CDCl_3$ )  $\delta$  8.69 (d,  $J = 7.6$  Hz, 1H), 7.74 (d,  $J = 7.8$  Hz, 1H), 7.62–7.50 (m, 2H), 7.29 (s, 1H), 5.49–5.38 (m, 1H), 2.66 (s, 3H), 1.46 (d,  $J = 6.0$  Hz, 6H), 1.45 (s, 9H).  $^{13}C$  NMR (126 MHz,  $CDCl_3$ )  $\delta$  167.4, 156.1, 142.4, 131.2, 128.0, 127.2, 126.6, 124.0, 123.7, 122.2, 116.4, 106.1, 69.6, 32.4, 30.3, 21.9, 16.8; **HRMS (ESI) calcd for**  $C_{20}H_{25}N_2O_2^+$   $[M + H]^+$ : 325.1911; Found: 325.1913.

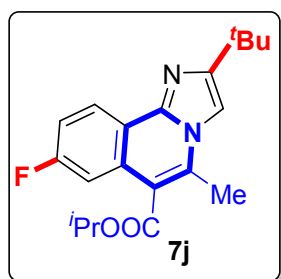

**Isopropyl 2-(*tert*-butyl)-8-fluoro-5-methylimidazo[2,1-*a*]isoquinoline-6-carboxylate (7j)** was obtained as a yellow solid (57 mg, 84%), m. p. = 151–152;  $^1H$  NMR (500 MHz,  $CDCl_3$ )  $\delta$  8.68 (dd,  $J = 8.7, 5.9$  Hz, 1H), 7.46 (dd,  $J = 10.6, 1.7$  Hz,

1H), 7.30 (dd,  $J = 8.5, 1.8$  Hz, 1H), 7.28 (s, 1H), 5.42 (m, 1H), 2.67 (s, 3H), 1.46 (d,  $J = 6.3$  Hz, 6H), 1.44 (s, 9H);  $^{13}\text{C}$  NMR (126 MHz,  $\text{CDCl}_3$ )  $\delta$  166.8, 162.3 (d,  $J = 246.7$  Hz), 156.2, 142.1, 133.1, 128.3 (d,  $J = 9.5$  Hz), 126.2 (d,  $J = 9.2$  Hz), 118.8, 116.0 (d,  $J = 23.8$  Hz), 115.6 (d,  $J = 3.6$  Hz), 109.5 (d,  $J = 24.0$  Hz), 106.0, 69.8, 32.4, 30.2, 21.9, 17.0; HRMS (ESI) calcd for  $\text{C}_{20}\text{H}_{24}\text{N}_2\text{FO}_2^+$  [ $\text{M} + \text{H}$ ] $^+$ : 343.1816; Found: 343.1816.

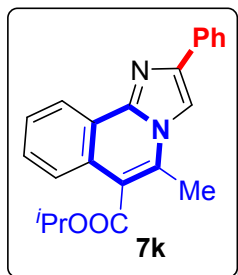

Isopropyl 5-methyl-2-phenylimidazo[2,1-*a*]isoquinoline-6-carboxylate (7k) was obtained as a yellow solid (32 mg, 46%), m. p. = 125–127;  $^1\text{H}$  NMR (500 MHz,  $\text{CDCl}_3$ )  $\delta$  8.76 (dd,  $J = 7.8, 0.9$  Hz, 1H), 8.08–7.99 (m, 2H), 7.82 (s, 1H), 7.76 (d,  $J = 7.7$  Hz, 1H), 7.65–7.55 (m, 2H), 7.45 (t,  $J = 7.7$  Hz, 2H), 7.33 (t,  $J = 7.4$  Hz, 1H), 5.53–5.40 (m, 1H), 2.69 (s, 3H), 1.48 (d,  $J = 6.3$  Hz, 6H);  $^{13}\text{C}$  NMR (126 MHz,  $\text{CDCl}_3$ )  $\delta$  167.1, 144.7, 143.2, 133.7, 131.0, 128.7, 128.5, 127.8, 127.6, 126.8, 125.9, 124.1, 123.7, 122.2, 117.3, 107.6, 69.8, 21.9, 16.8; HRMS (ESI) calcd for  $\text{C}_{22}\text{H}_{21}\text{N}_2\text{O}_2^+$  [ $\text{M} + \text{H}$ ] $^+$ : 345.1598; Found: 345.1599.

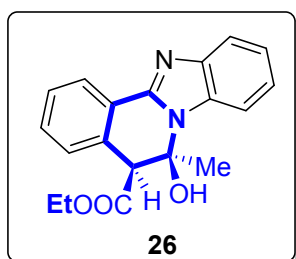

Ethyl 6-hydroxy-6-methyl-5,6-dihydrobenzo[4,5]imidazo[2,1-*a*]isoquinoline-5-carboxylate (26) was obtained as a white solid (62 mg, 97%), m. p. = 150–152;  $^1\text{H}$  NMR (500 MHz,  $\text{CDCl}_3$ )  $\delta$  8.33–8.22 (m, 1H), 8.03 (dd,  $J = 6.1, 3.0$  Hz, 1H), 7.84–7.74 (m, 1H), 7.53–7.38 (m, 3H), 7.31–7.22 (m, 2H), 6.17 (s, 1H), 4.07 (s, 1H), 4.14–3.94 (m, 2H), 1.61 (s, 3H), 1.07 (t,  $J = 7.1$  Hz, 3H);  $^{13}\text{C}$  NMR (126 MHz,  $\text{CDCl}_3$ )  $\delta$  171.4, 147.7, 144.2, 133.7, 130.9, 130.3, 130.2, 129.1, 126.0, 125.3, 123.3, 122.6, 119.6, 113.4, 87.3, 62.2, 55.3, 26.6, 13.7; HRMS (ESI) calcd for  $\text{C}_{19}\text{H}_{19}\text{N}_2\text{O}_3^+$  [ $\text{M} + \text{H}$ ] $^+$ : 323.1390; Found: 323.1394.

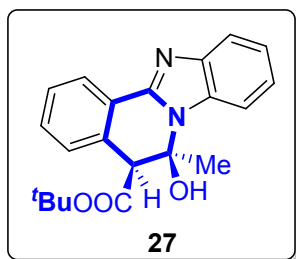

***tert*-Butyl 6-hydroxy-6-methyl-5,6-dihydrobenzo[4,5]imidazo[2,1-*a*]isoquinoline-5-carboxylate (27)** was obtained as a white solid (69 mg, 99%), m. p. = 162–165;  $^1\text{H}$  NMR (500 MHz,  $\text{CDCl}_3$ )  $\delta$  8.29 (d,  $J = 7.6$  Hz, 1H), 8.09–7.95 (m, 1H), 7.85–7.72 (m, 1H), 7.51–7.36 (m, 3H), 7.33–7.14 (m, 2H), 6.11 (s, 1H), 3.98 (s, 1H), 1.60 (s, 3H), 1.23 (s, 9H);  $^{13}\text{C}$  NMR (126 MHz,  $\text{CDCl}_3$ )  $\delta$  170.7, 147.8, 144.2, 133.7, 131.6, 130.2, 130.0, 128.9, 125.9, 125.2, 123.2, 122.5, 119.6, 113.4, 87.3, 83.8, 56.1, 27.6, 26.7; HRMS (ESI) calcd for  $\text{C}_{21}\text{H}_{23}\text{N}_2\text{O}_3^+$   $[\text{M} + \text{H}]^+$ : 351.1703; Found: 315.1705.

## 9. References

[S1] Pangborn, A. B.; Giardello, M. A.; Grubbs, R. H.; Rosen, R. K.; Timmers, F. J. *Organometallics* **1996**, *15*, 1518.

## 10. NMR Spectra

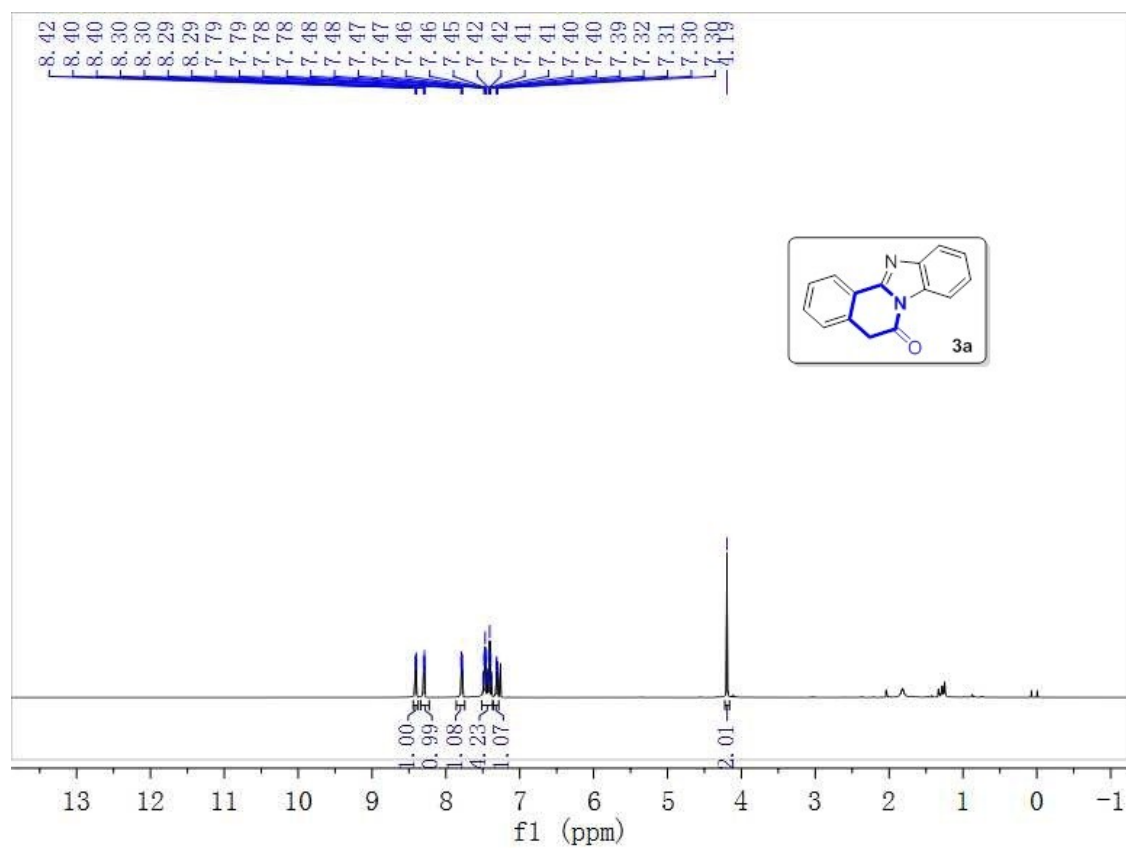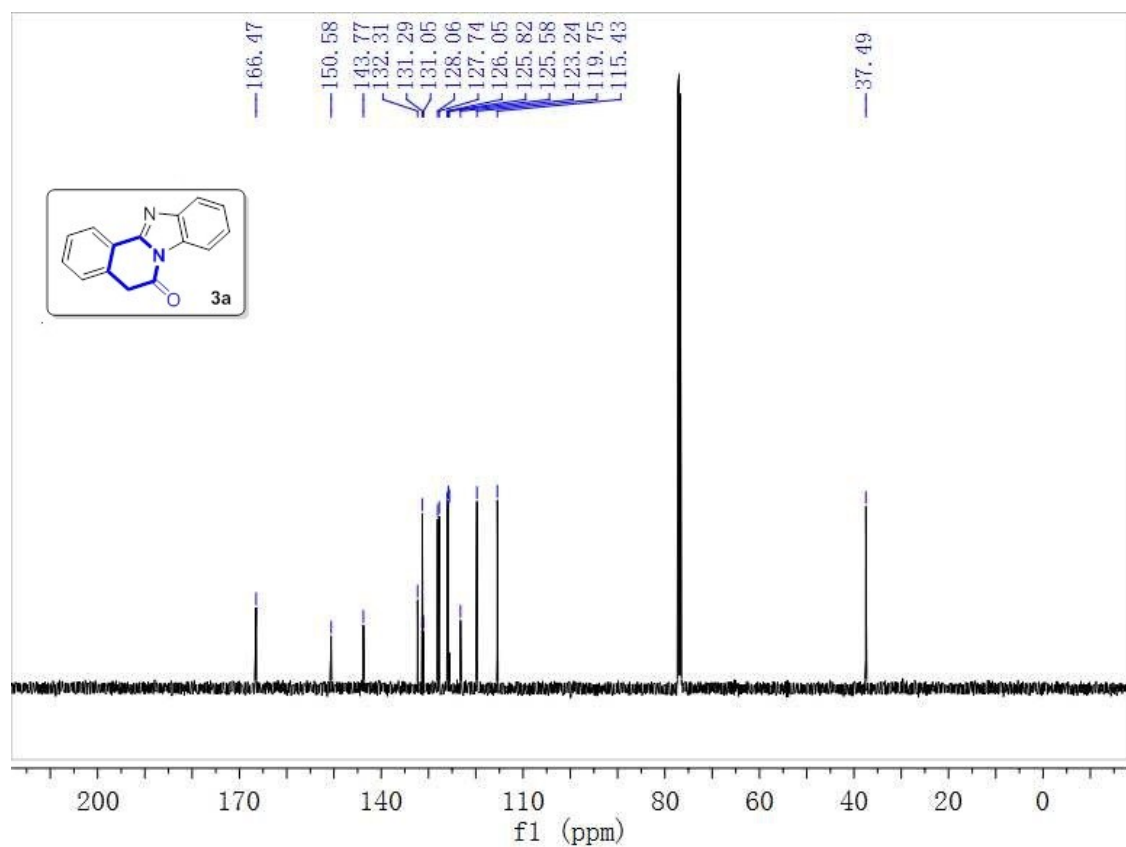

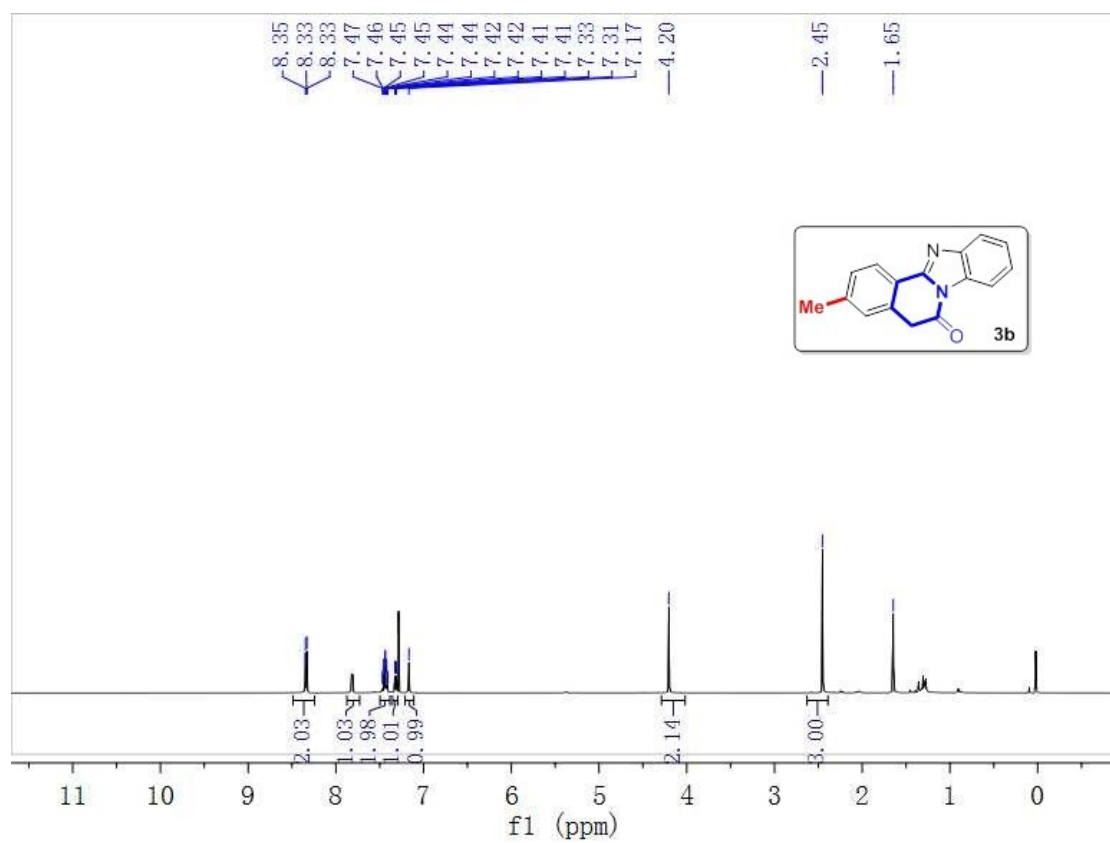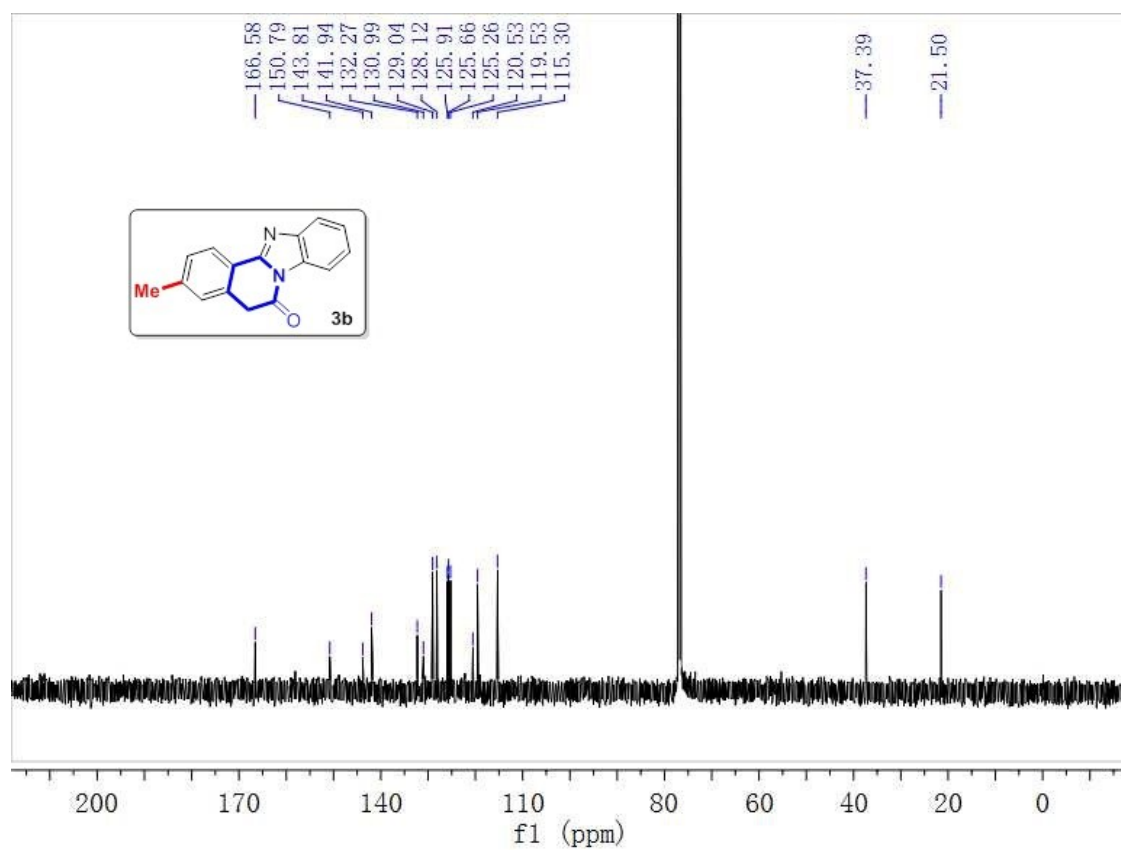



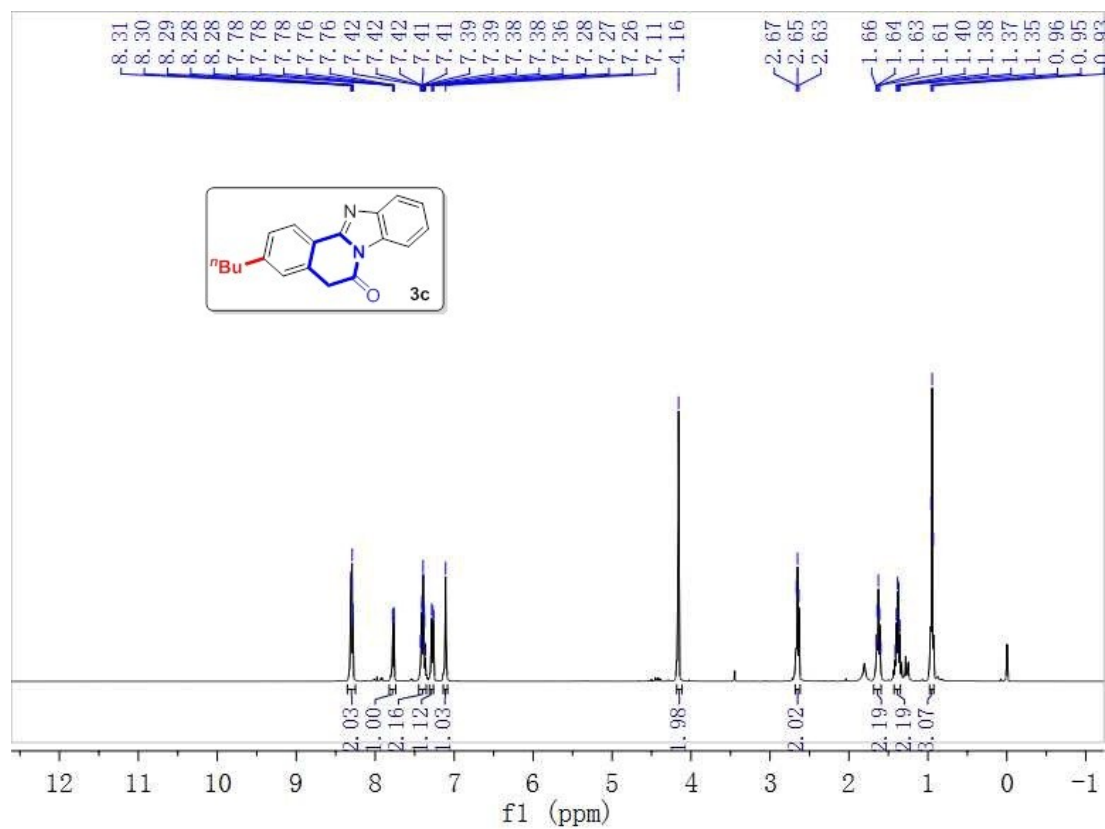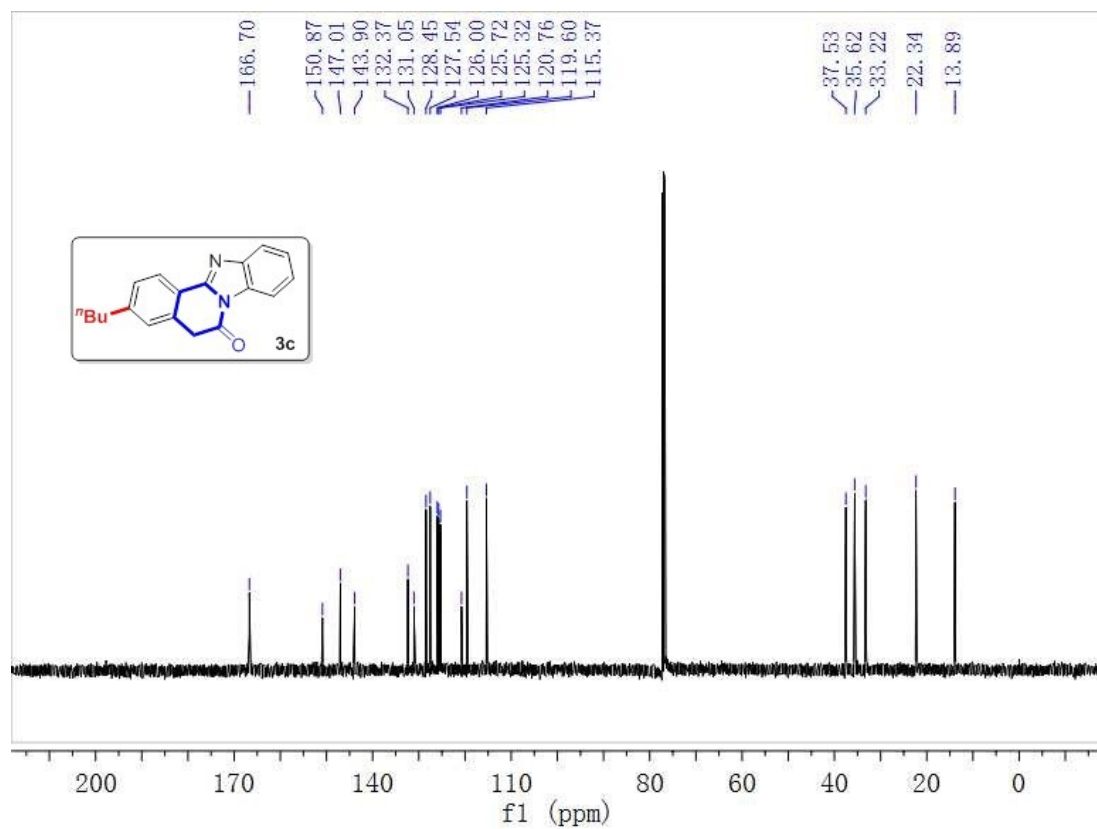

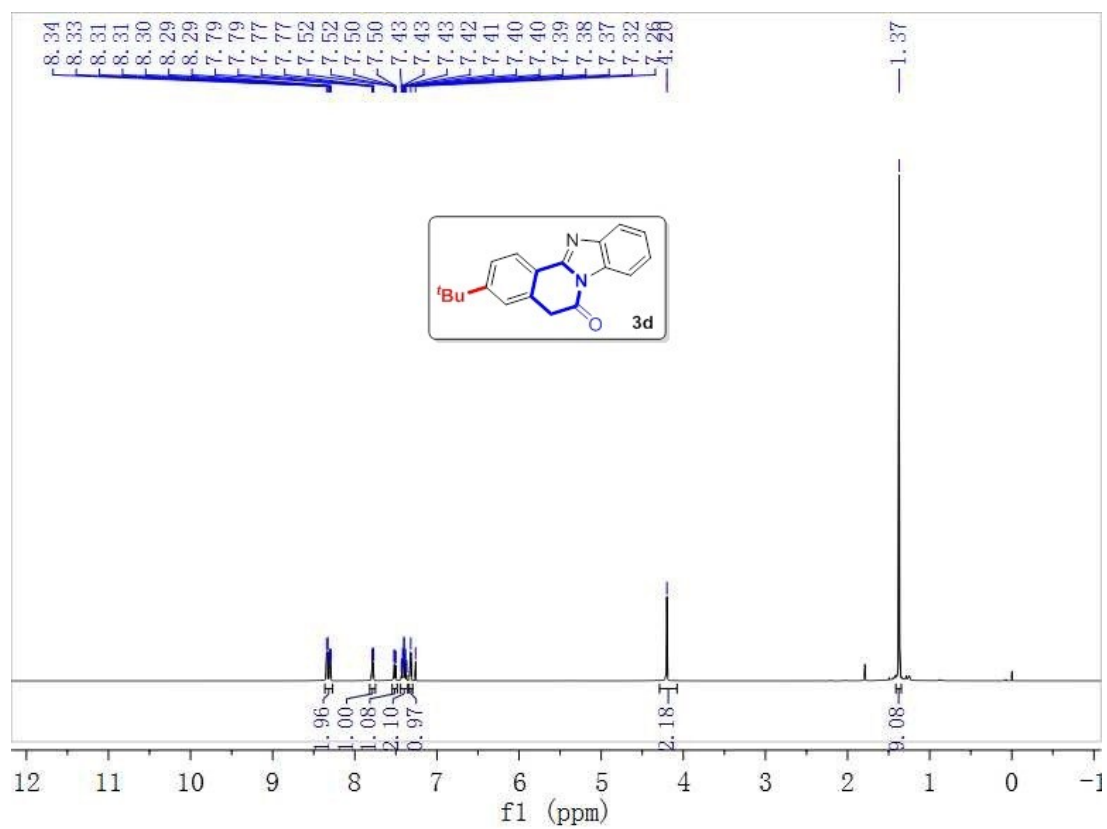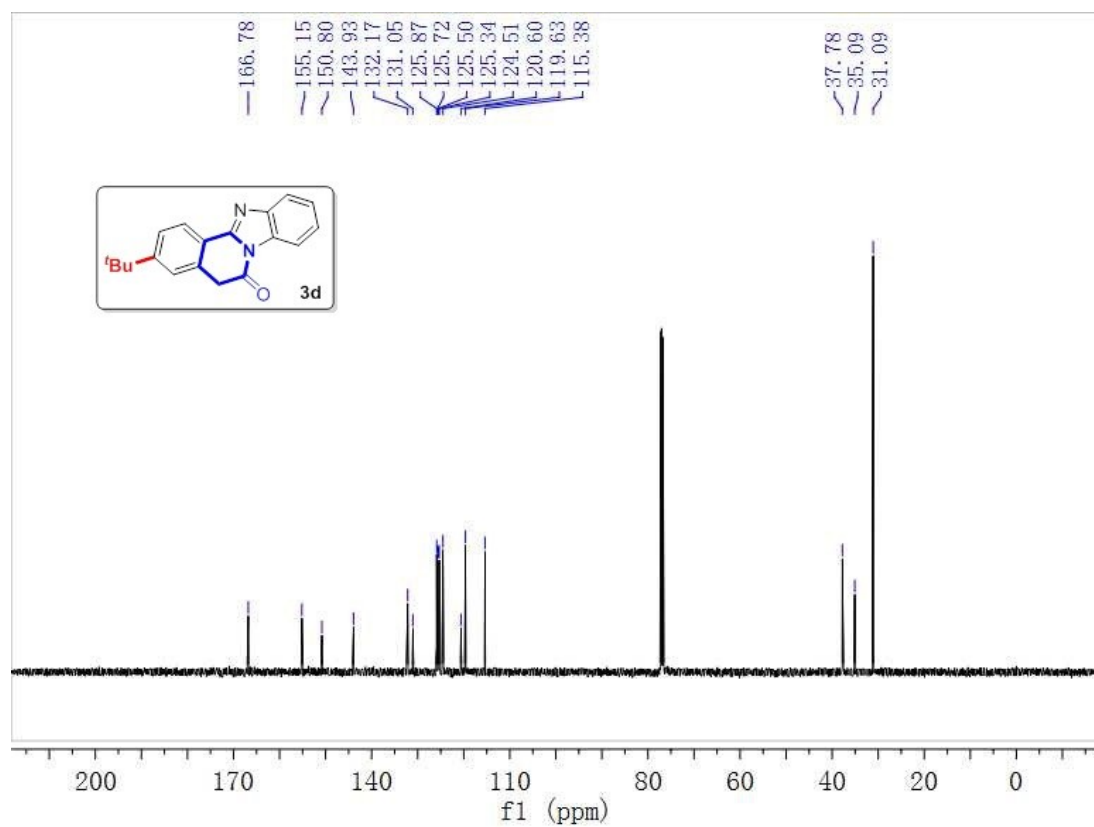

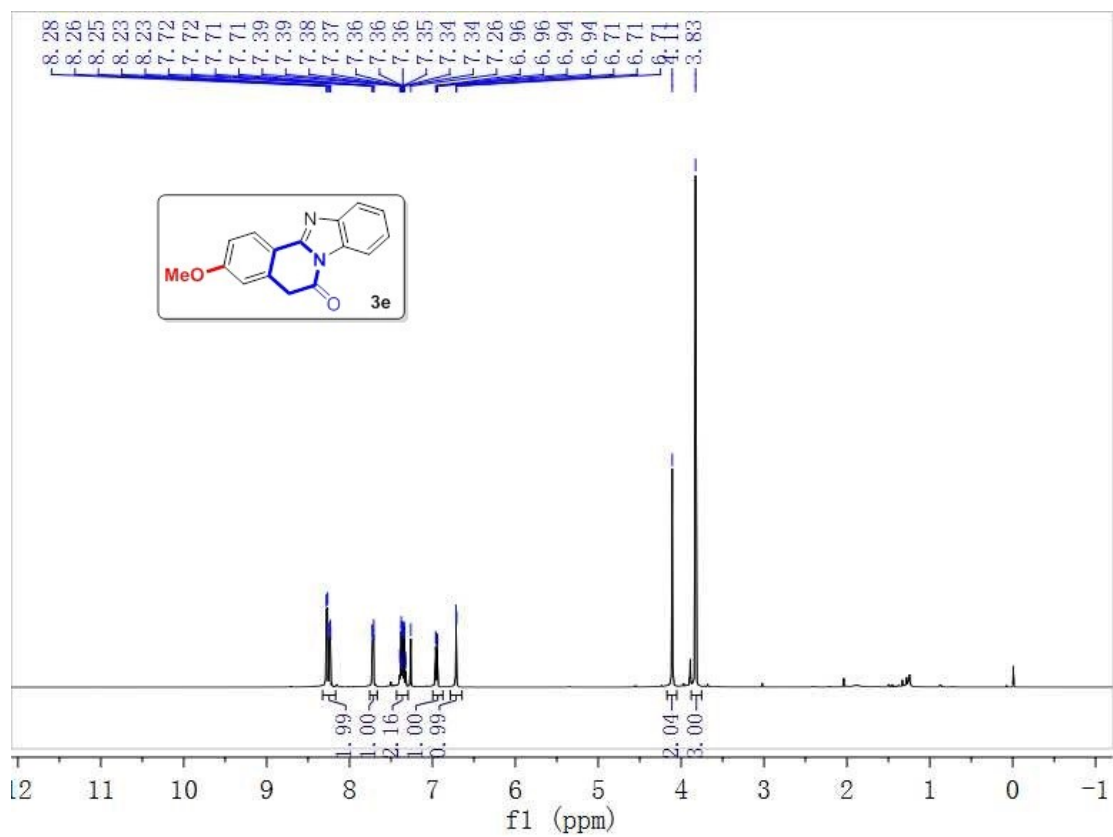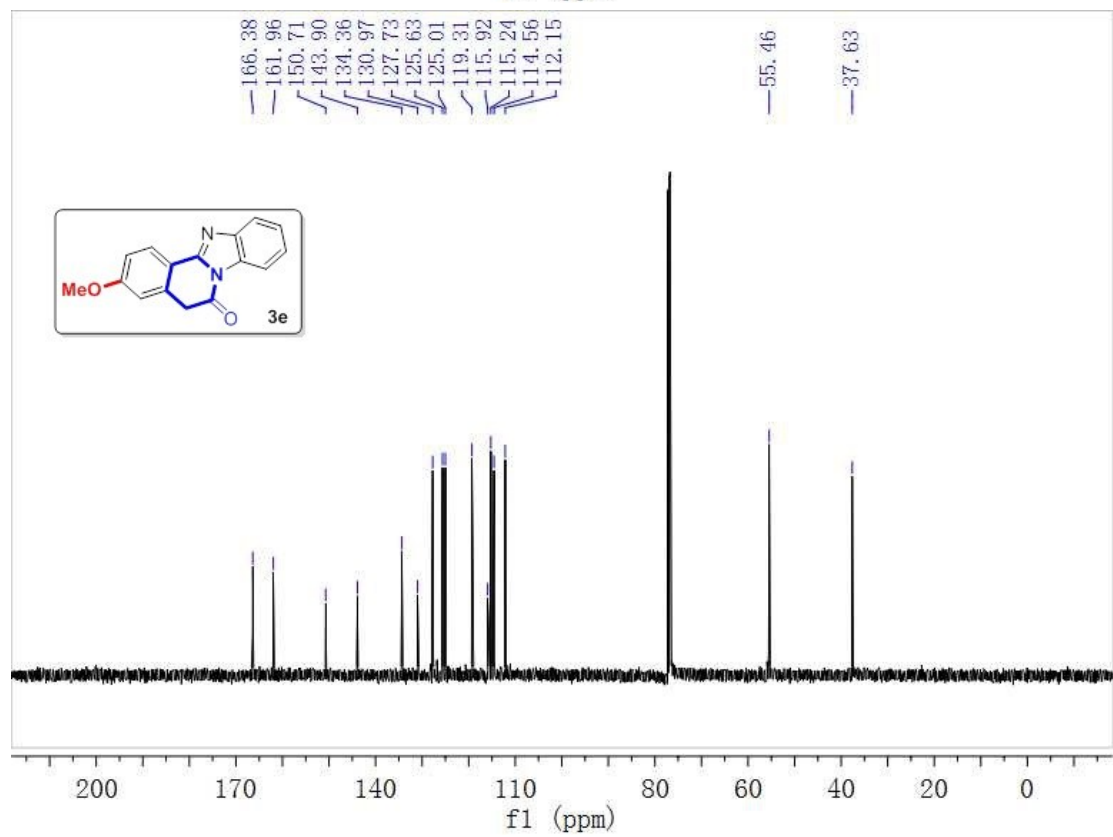

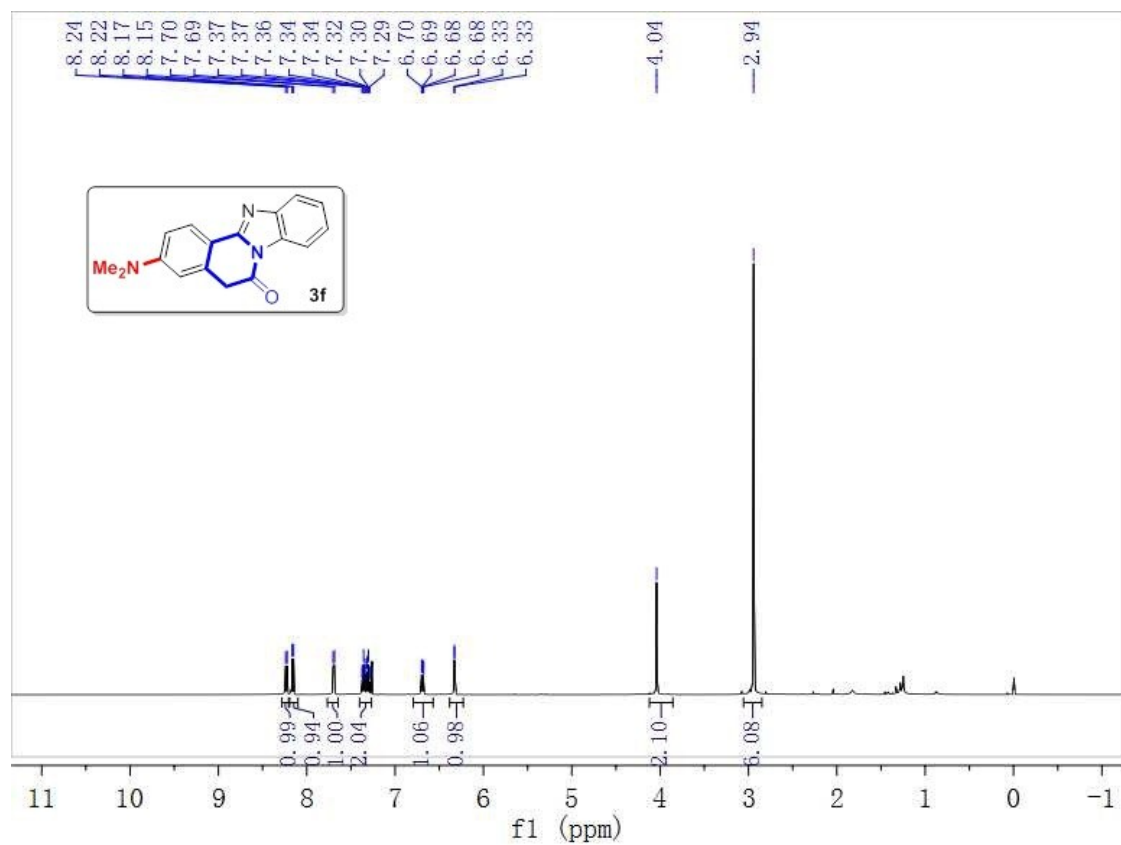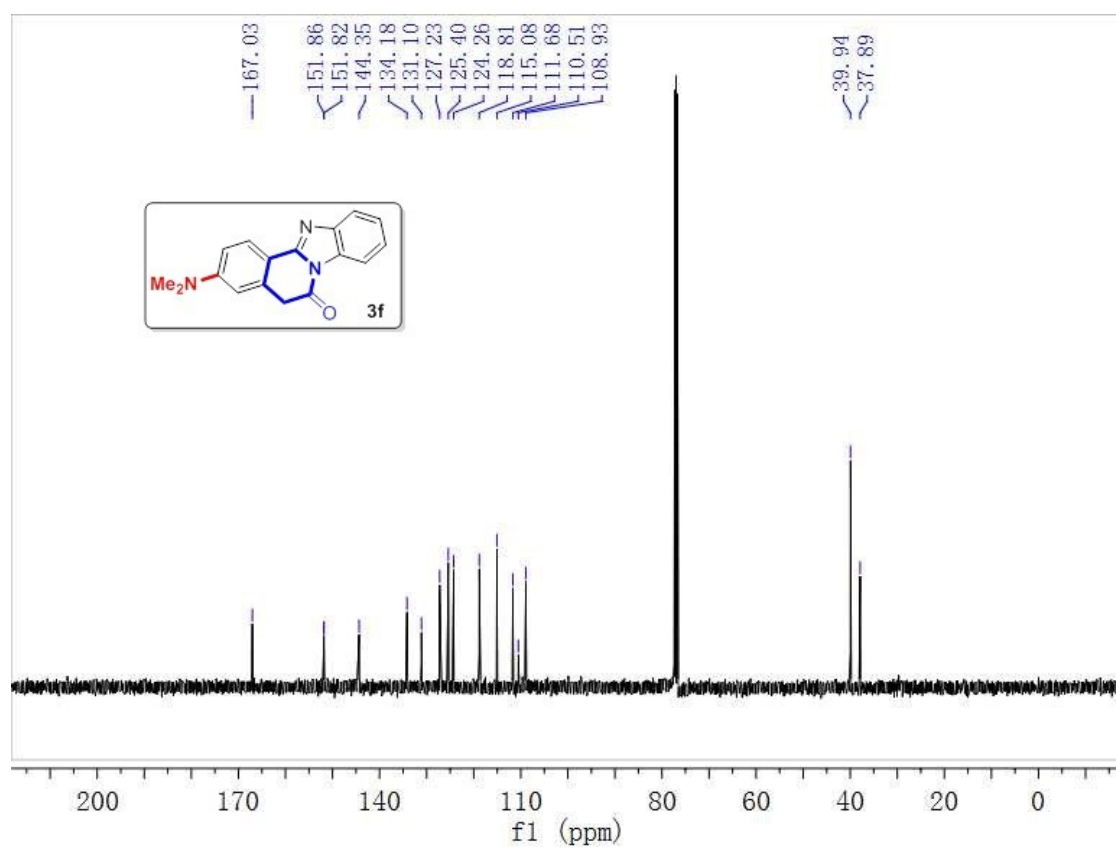

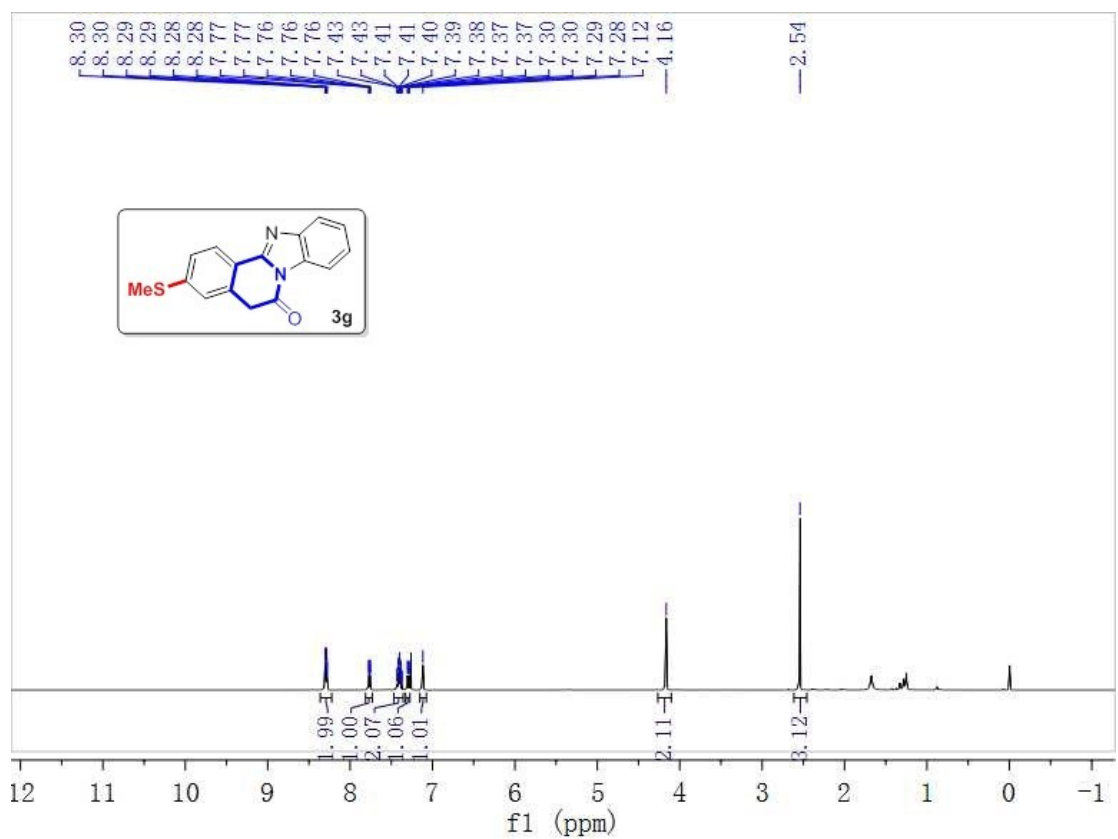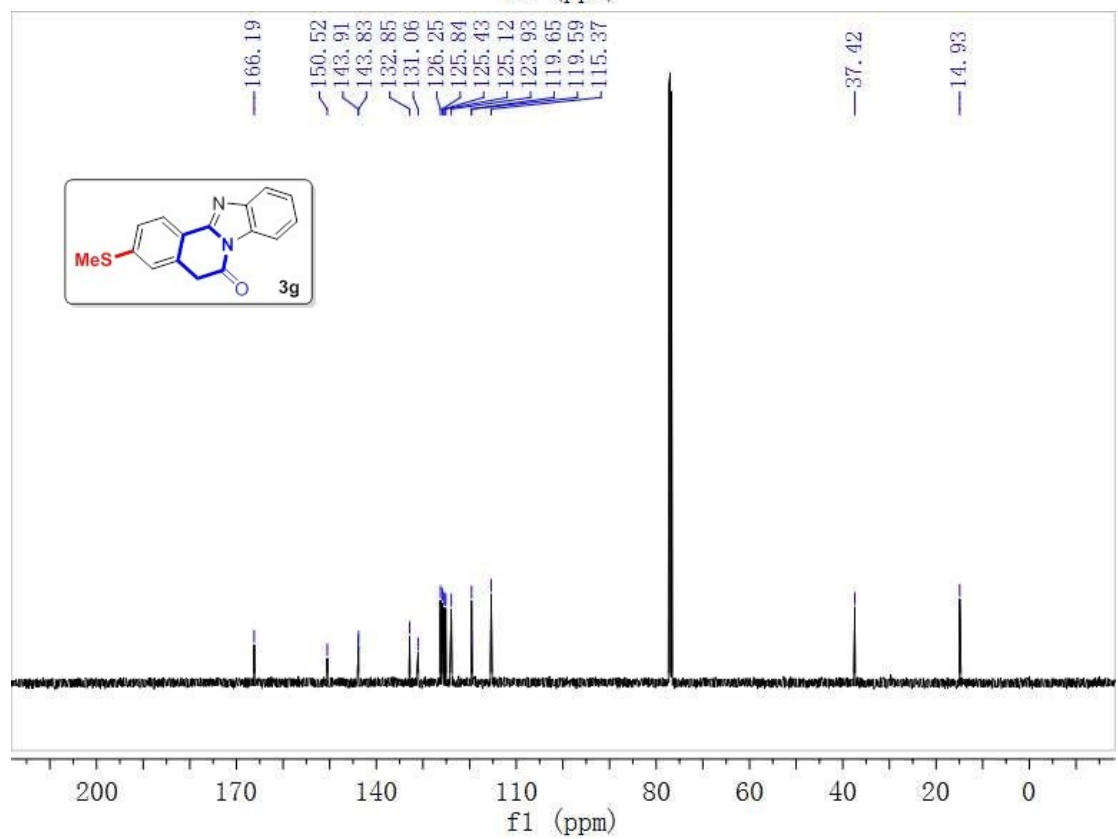

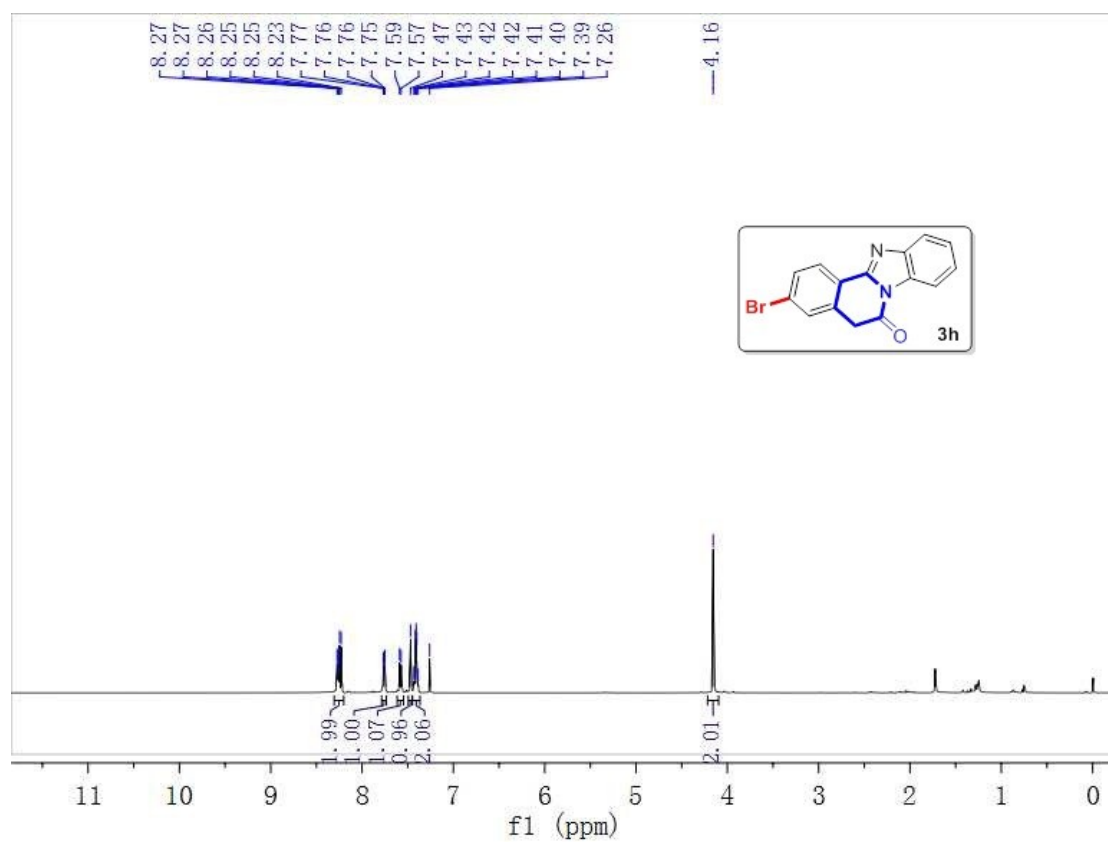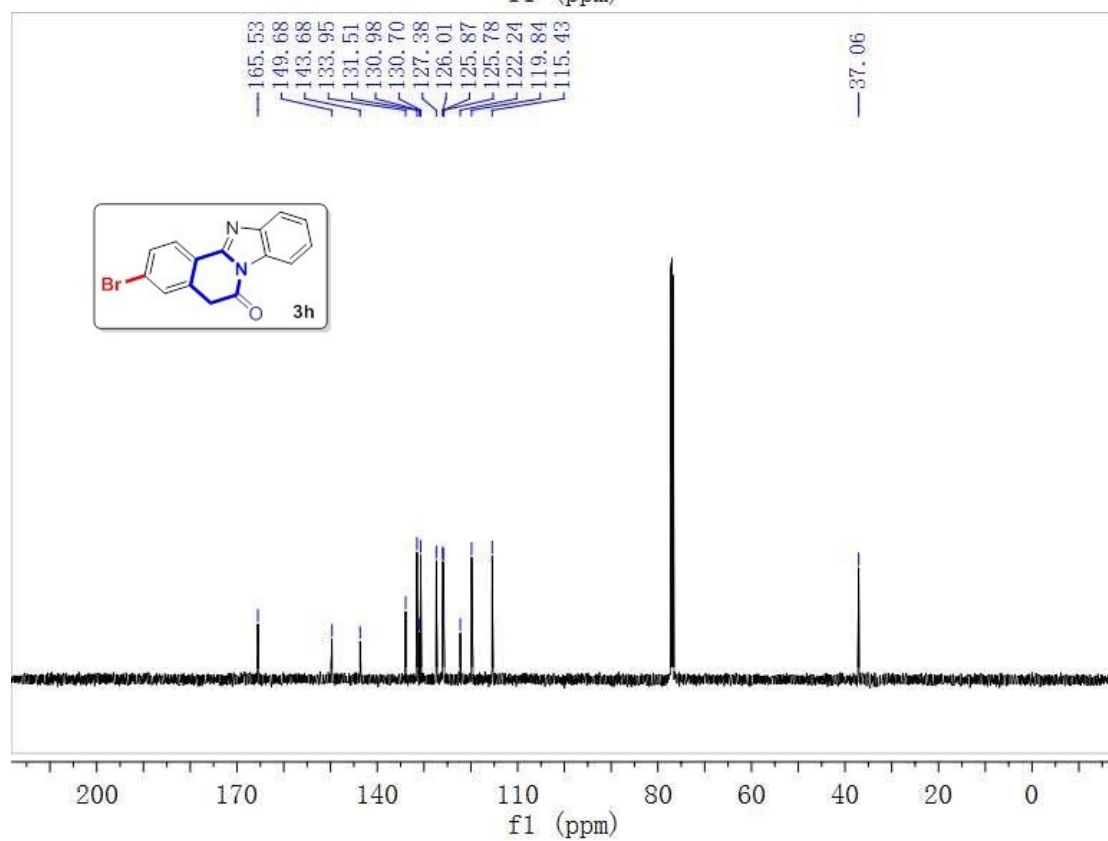

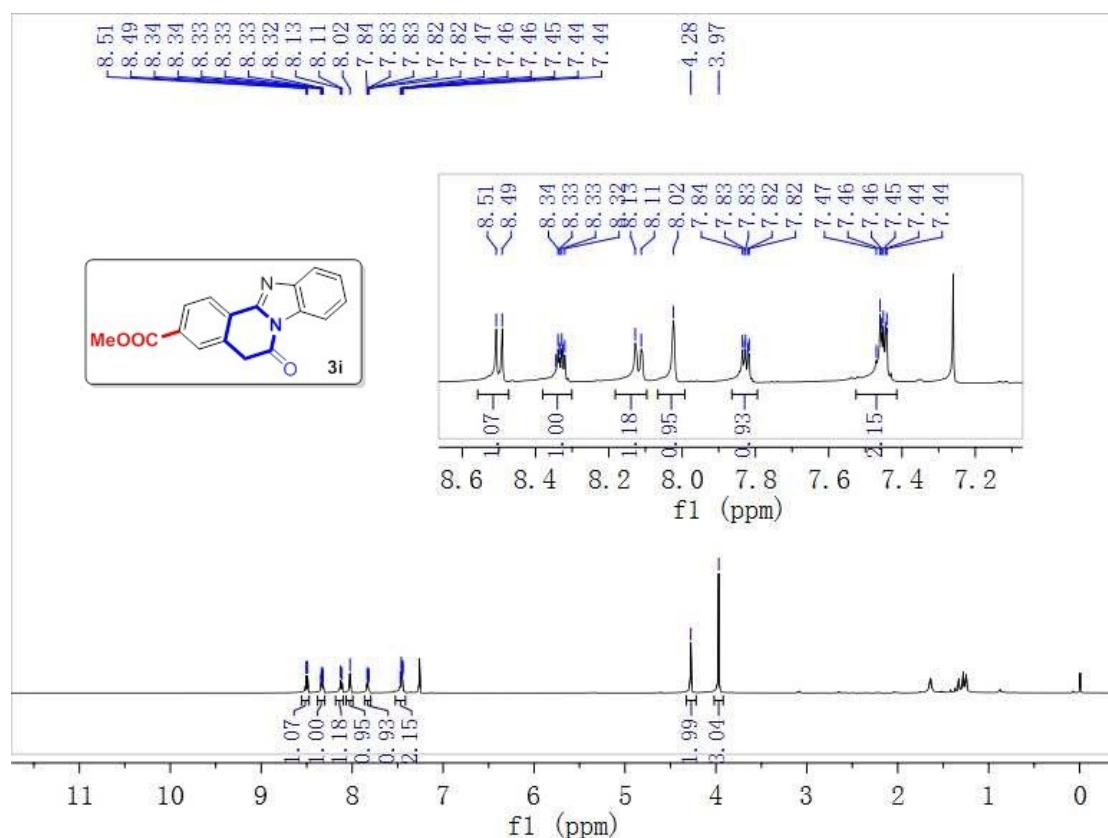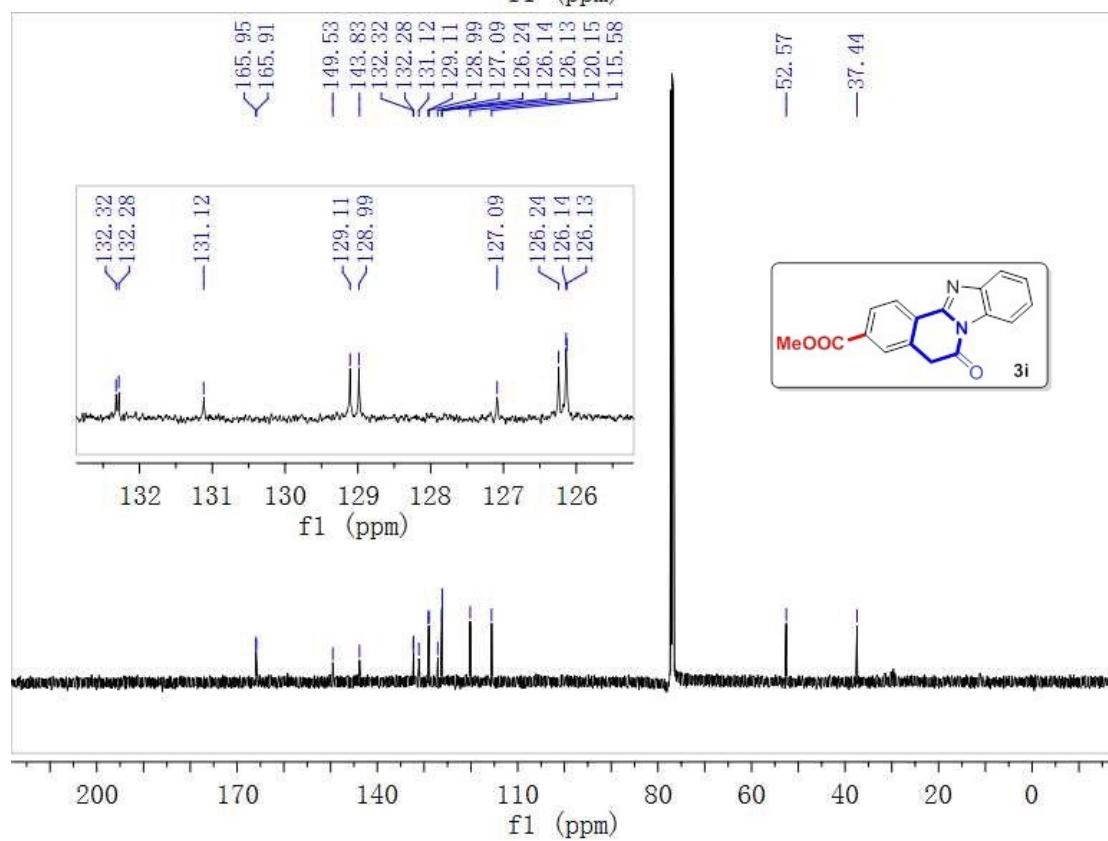

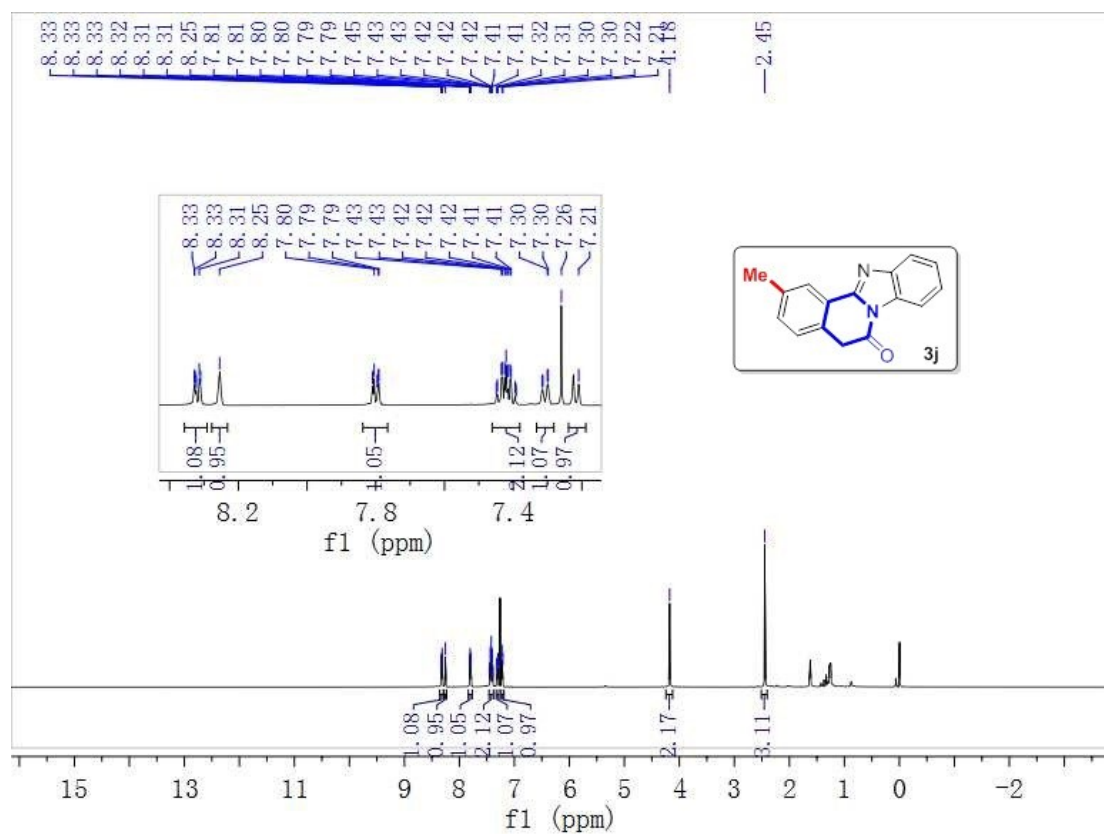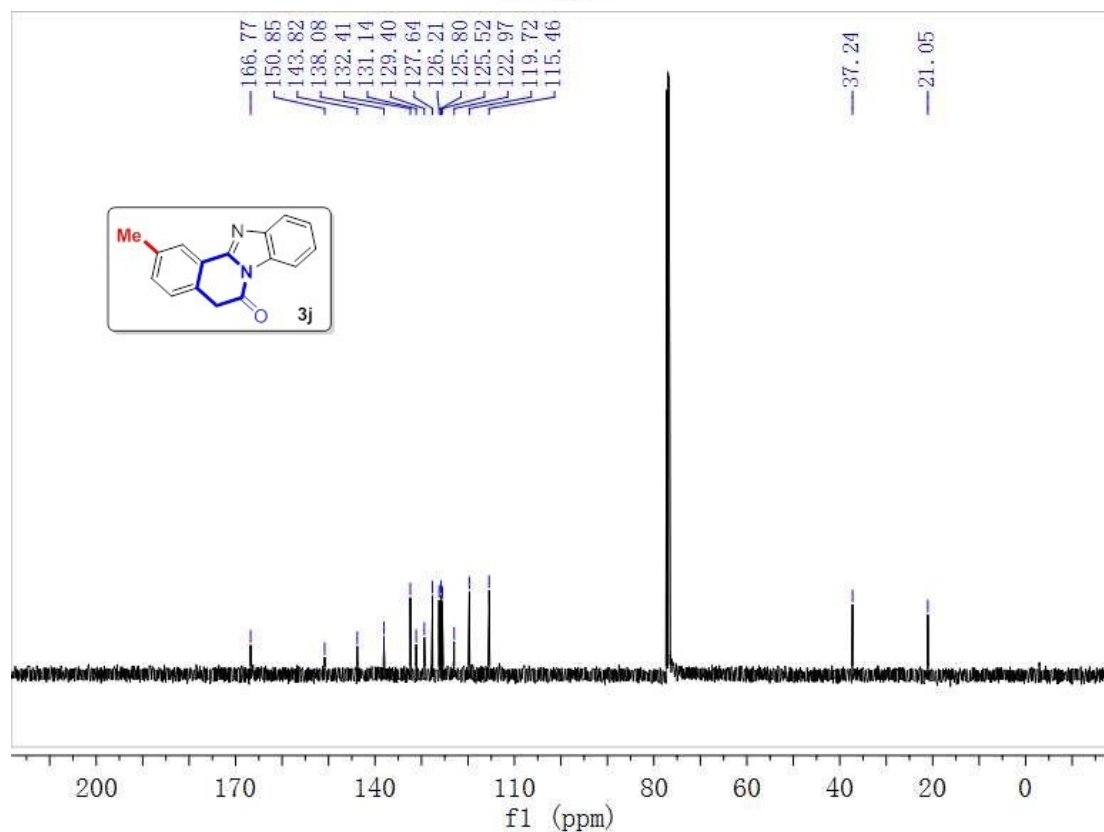



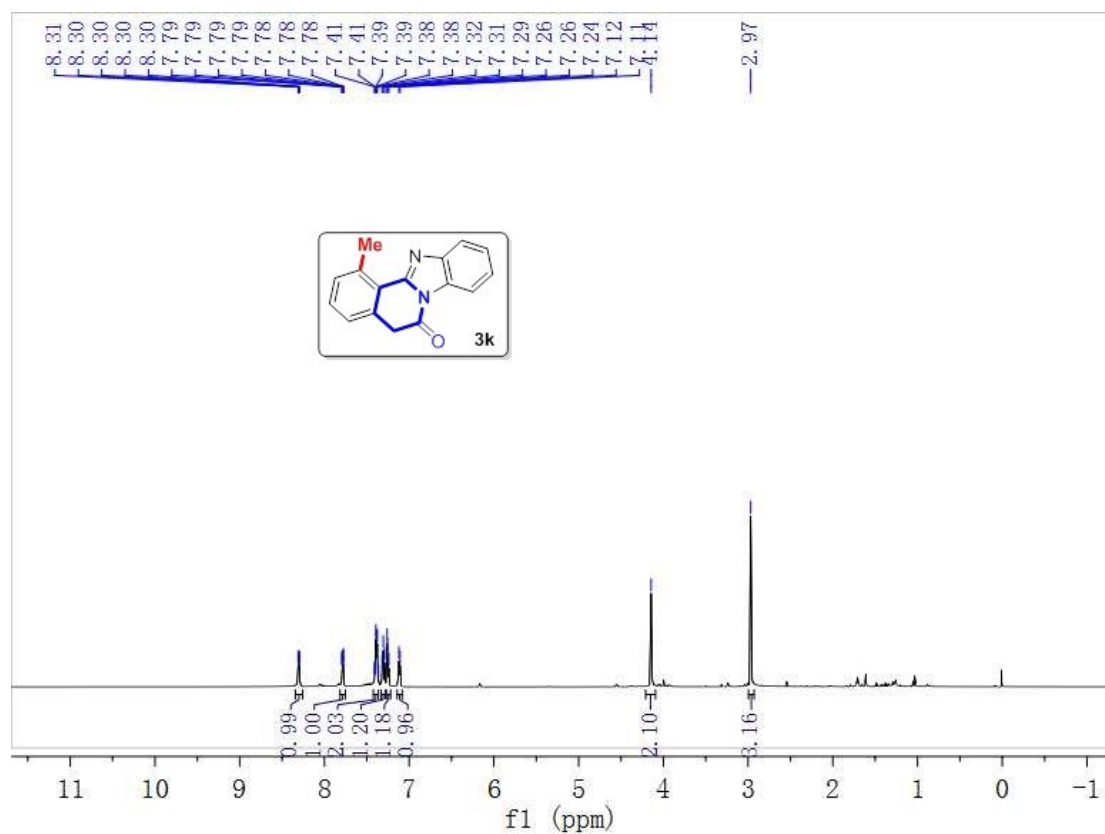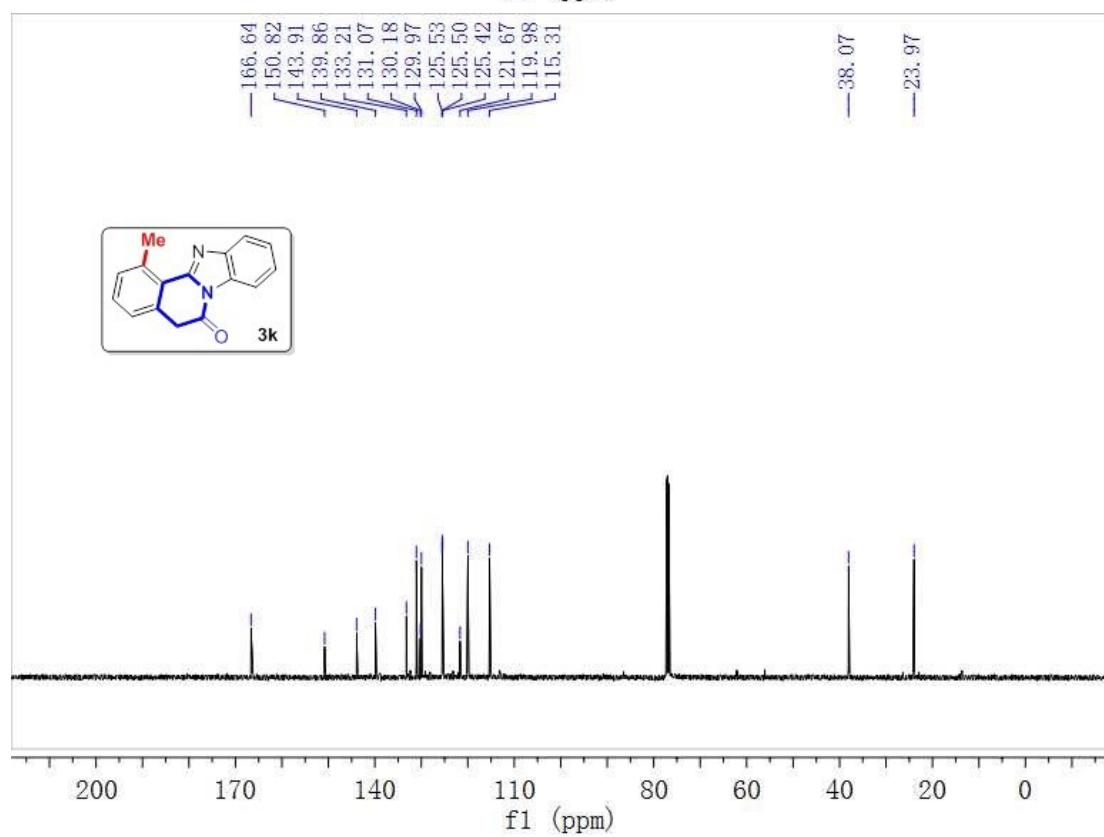

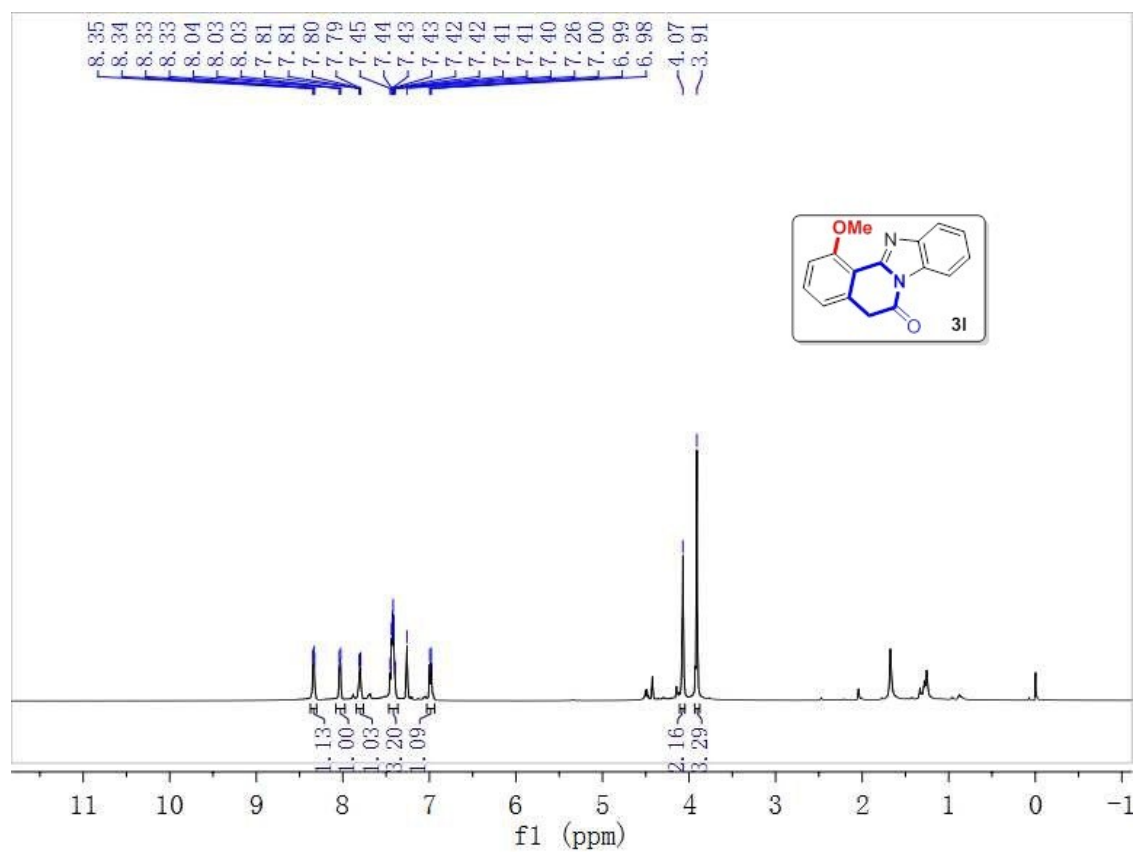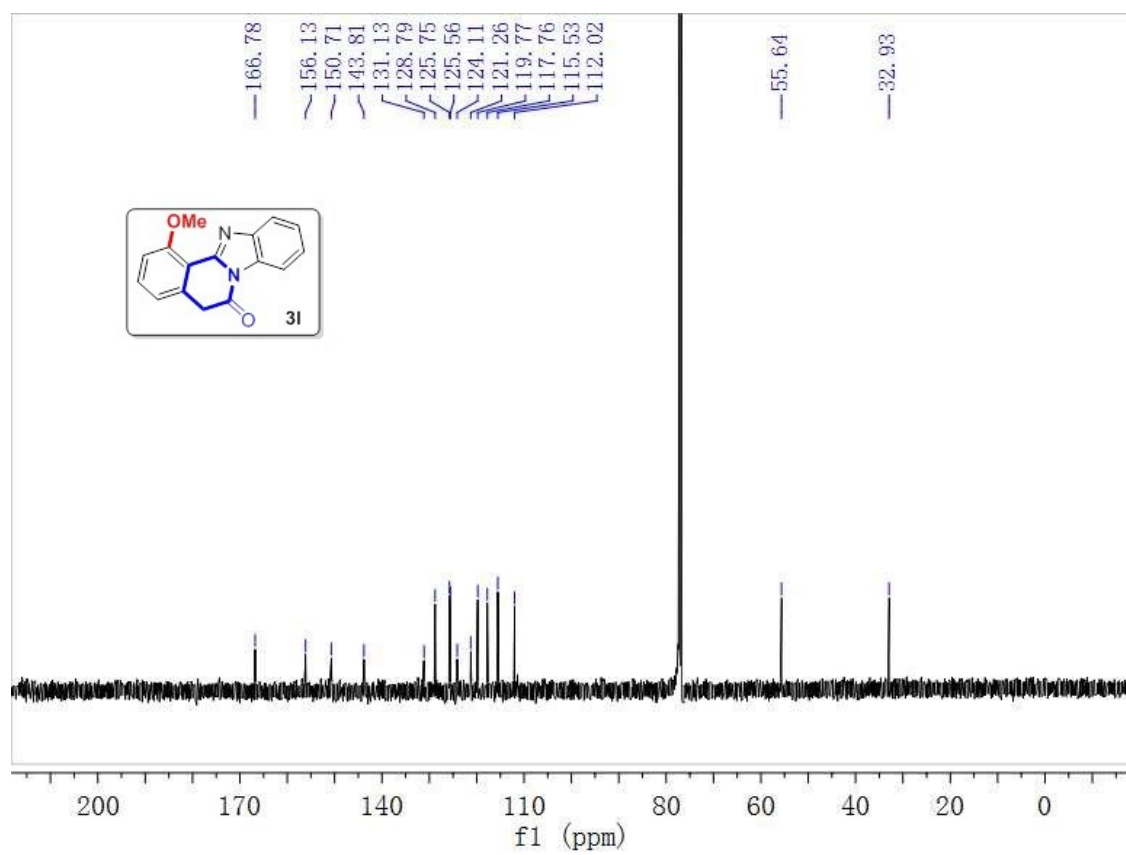

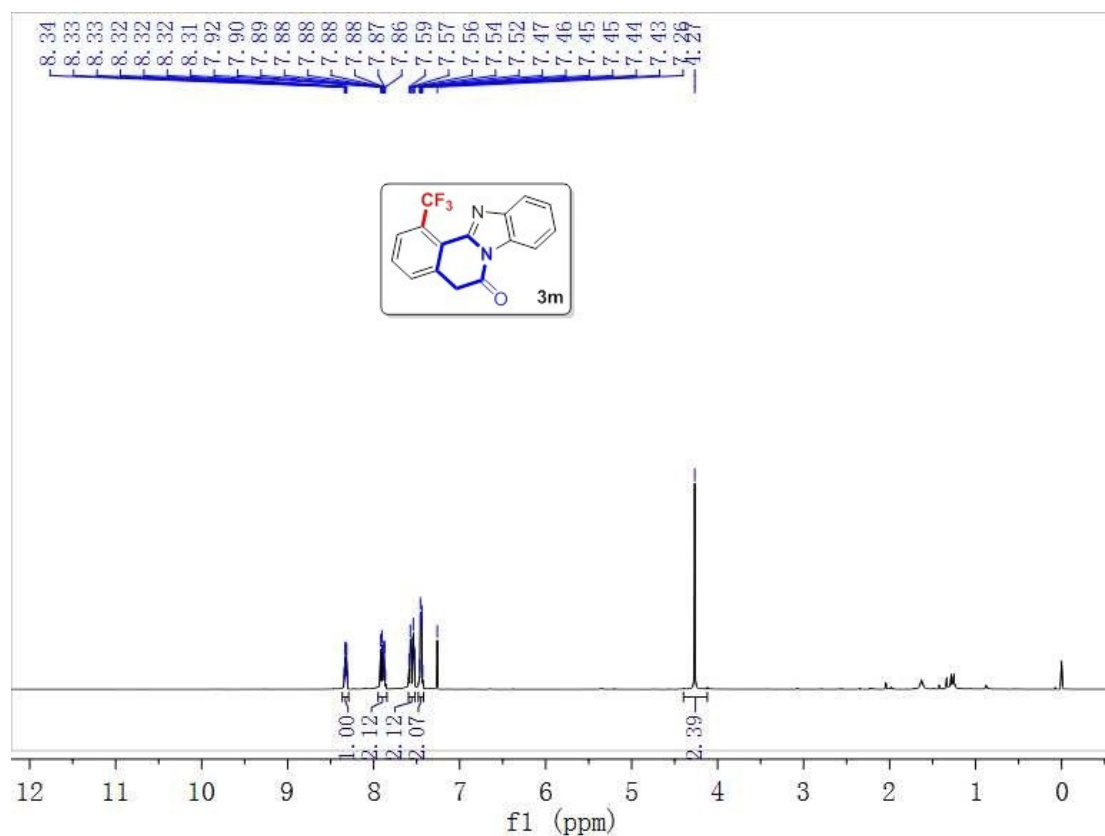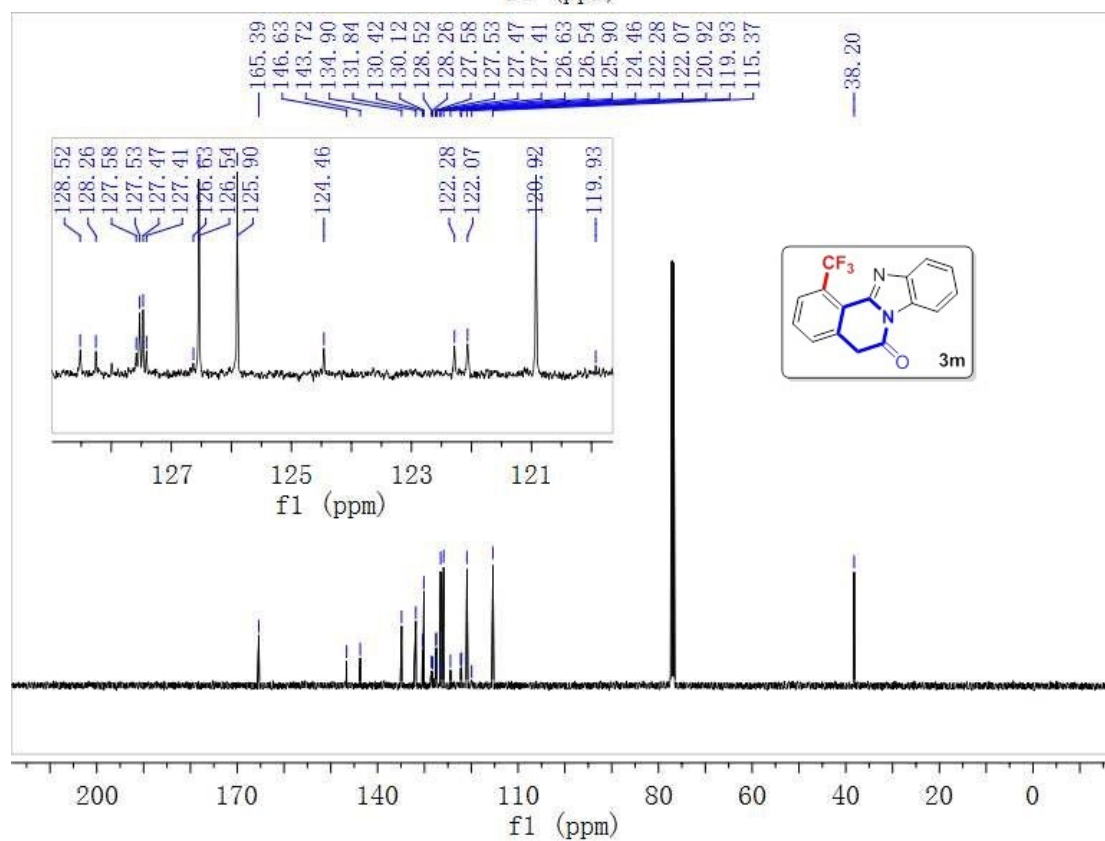

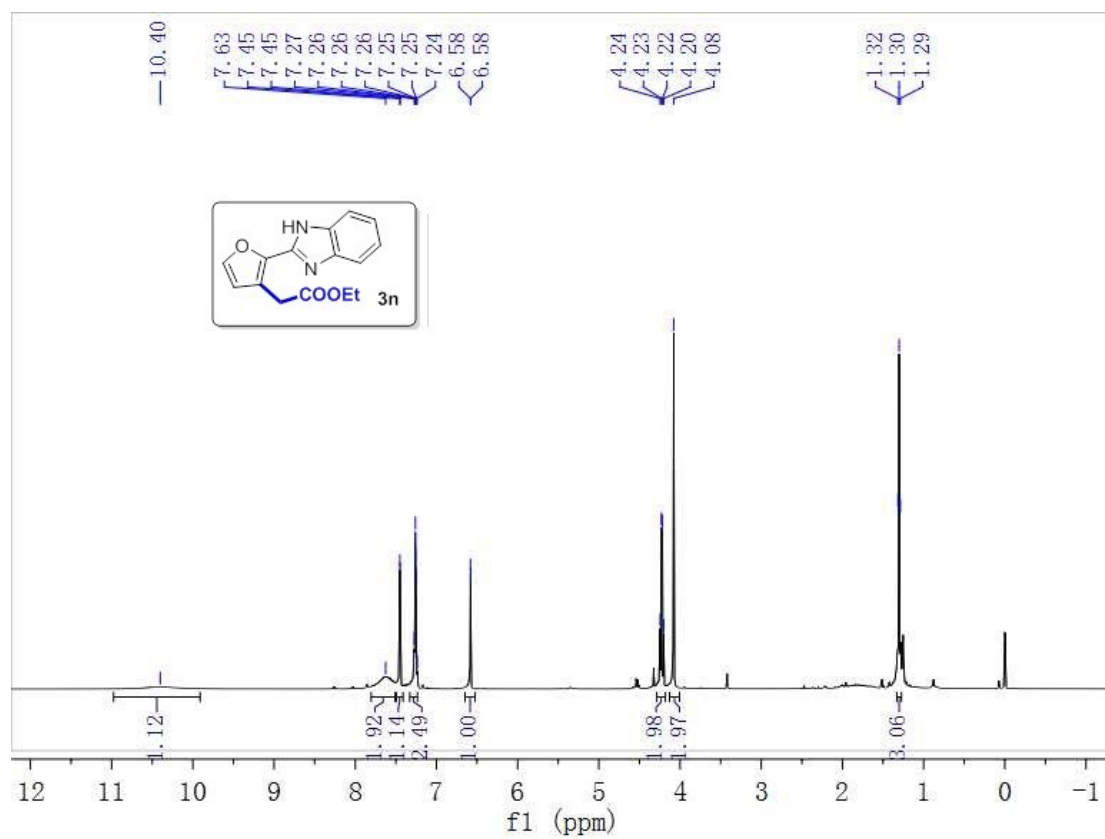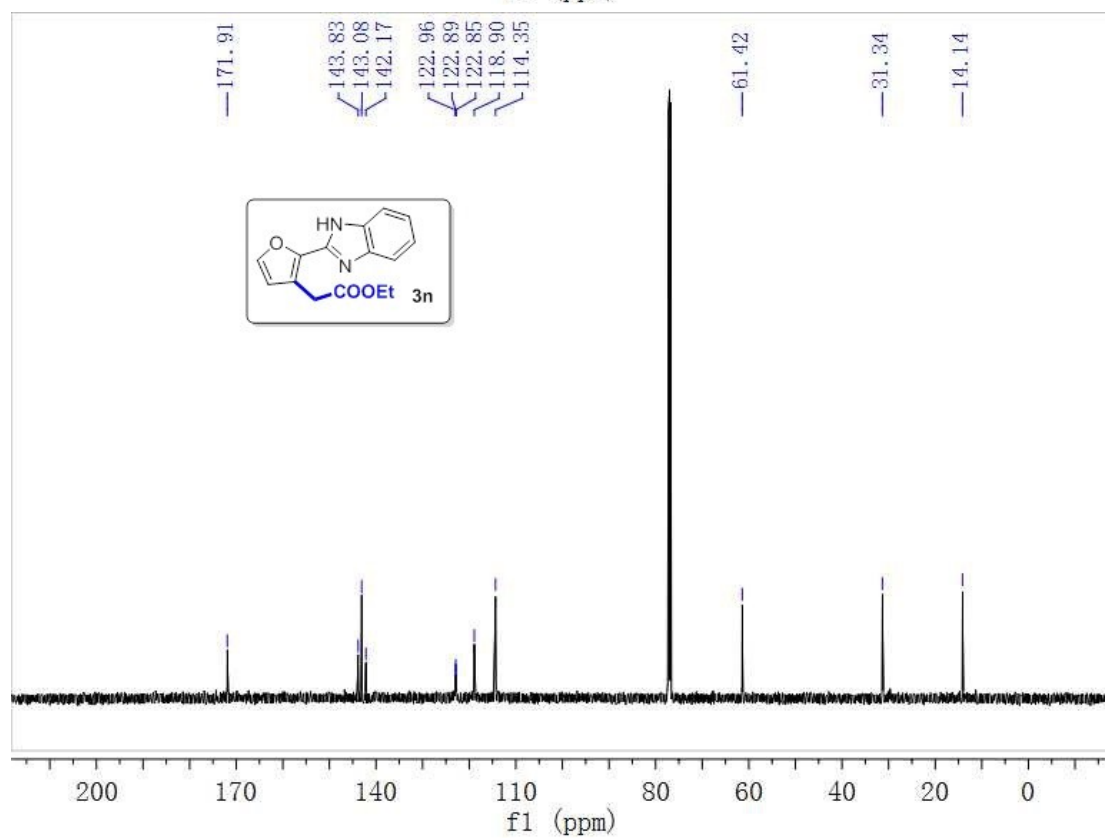

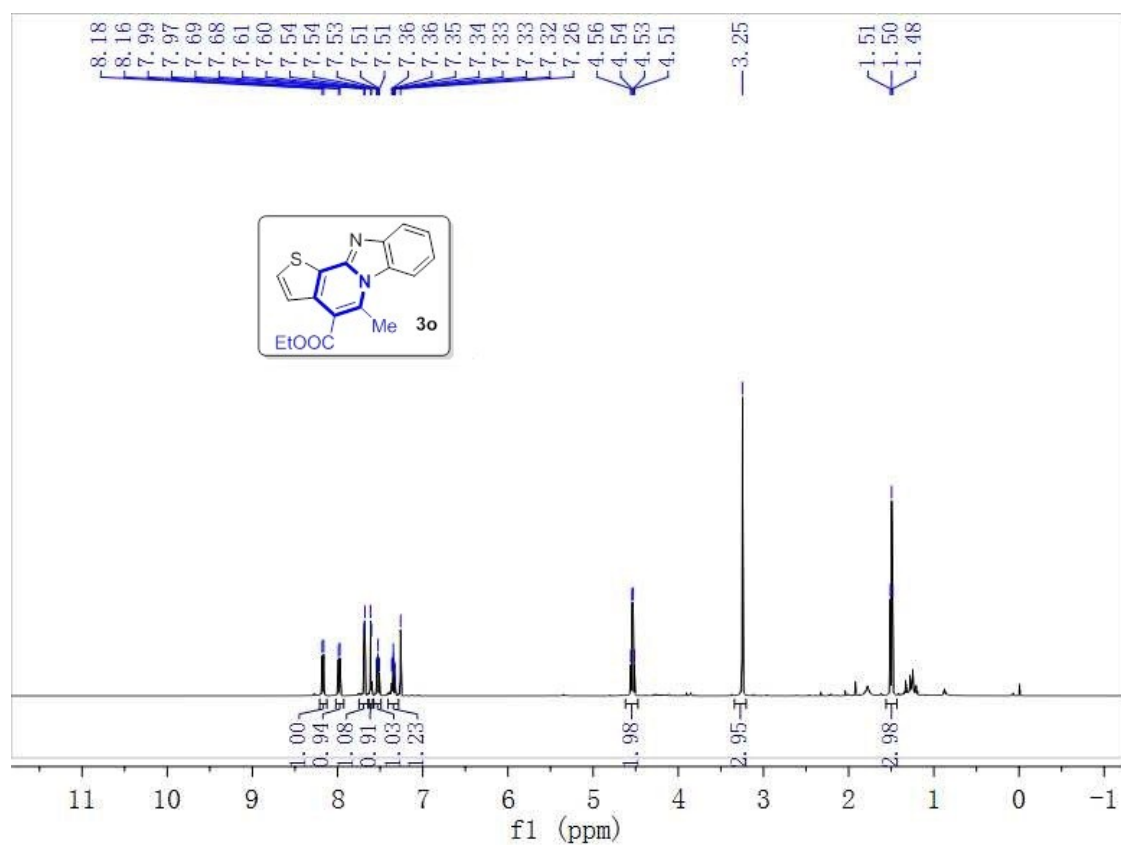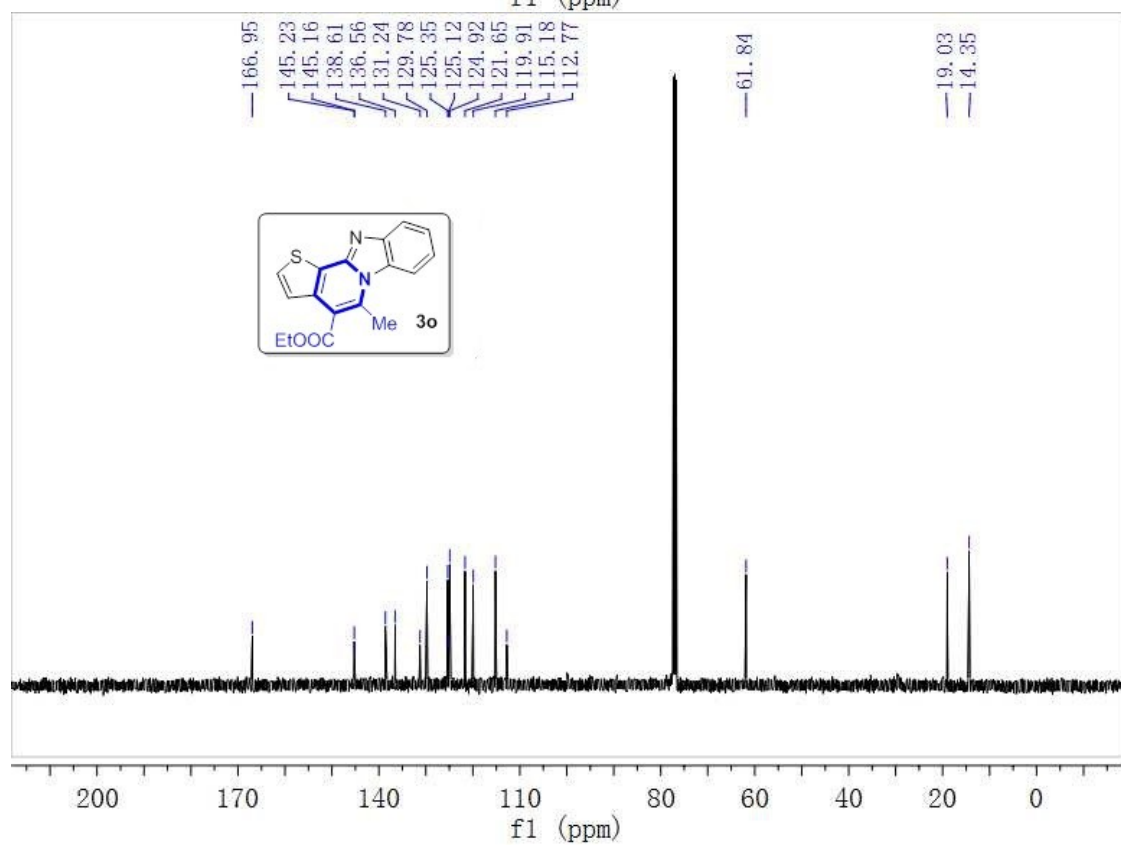

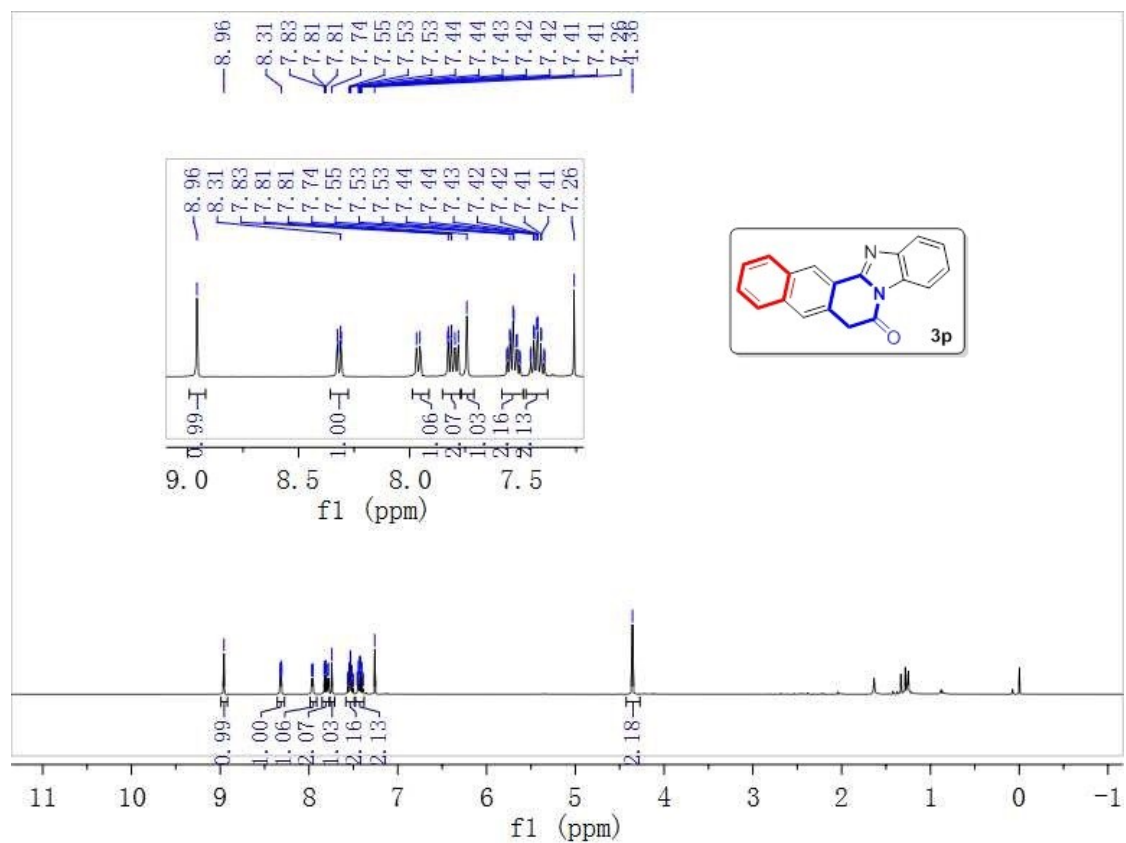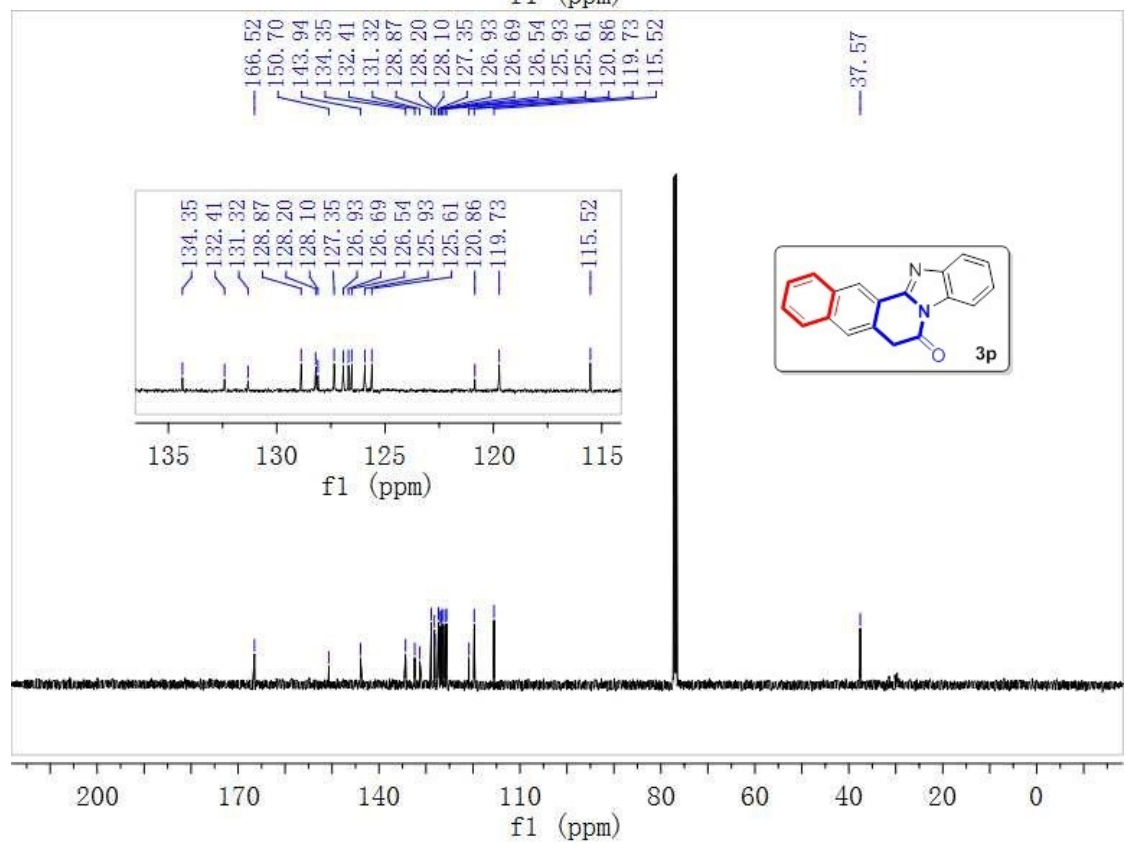

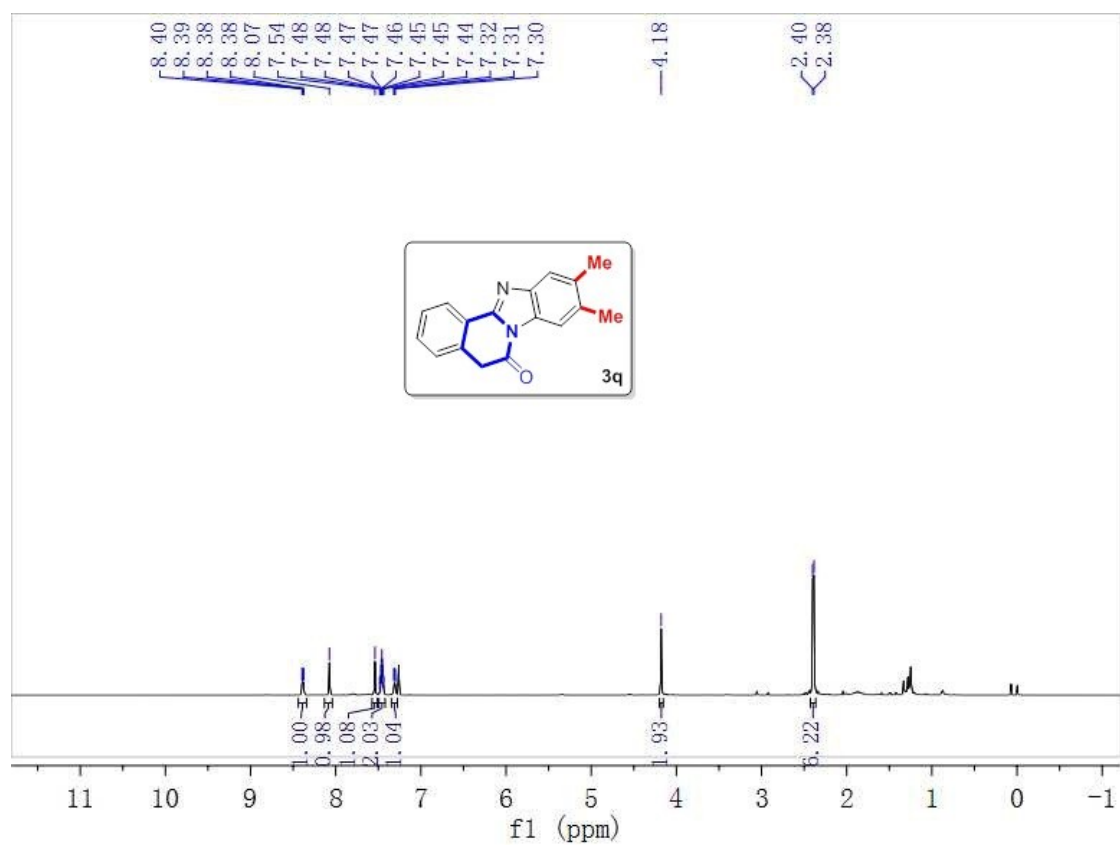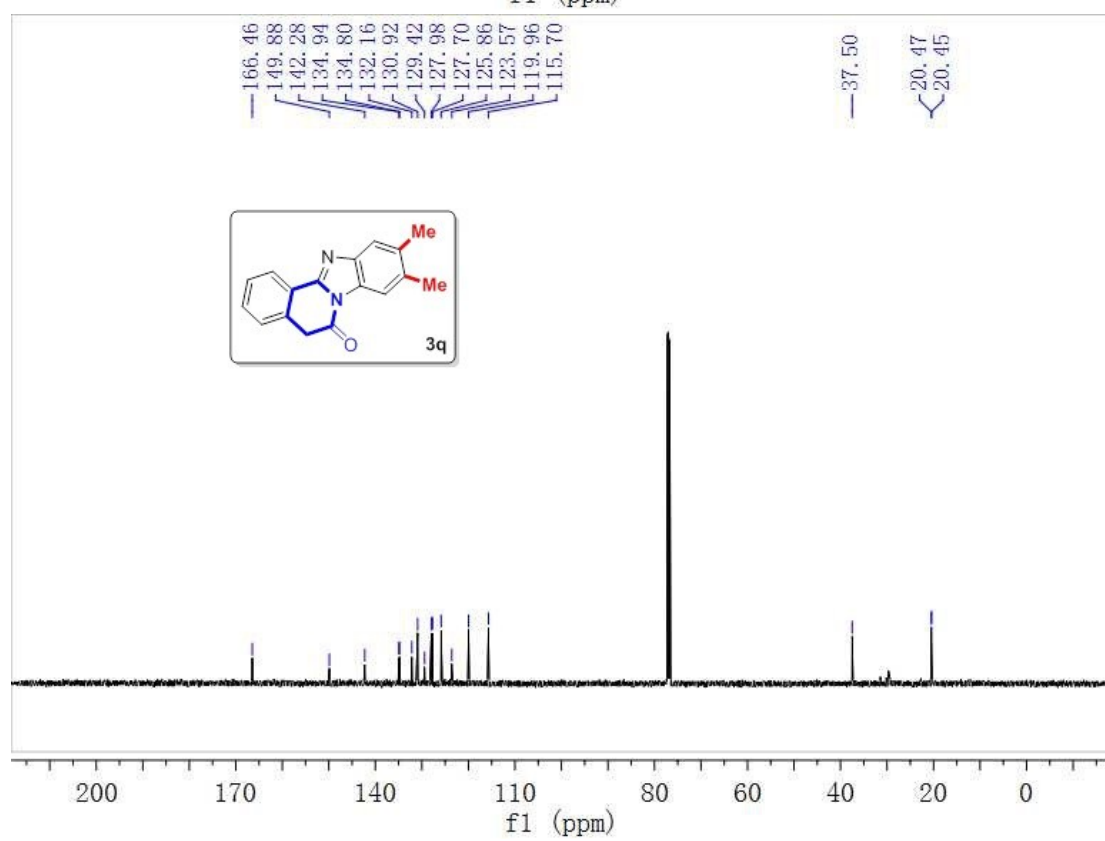

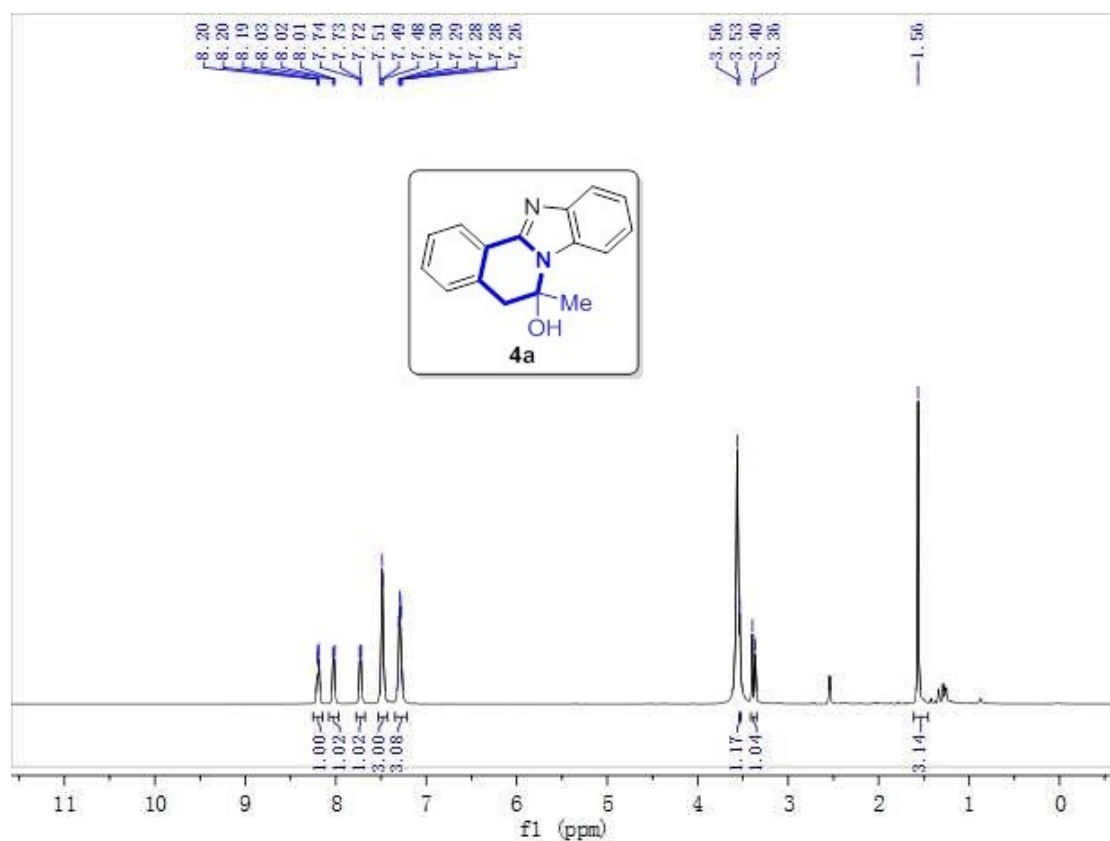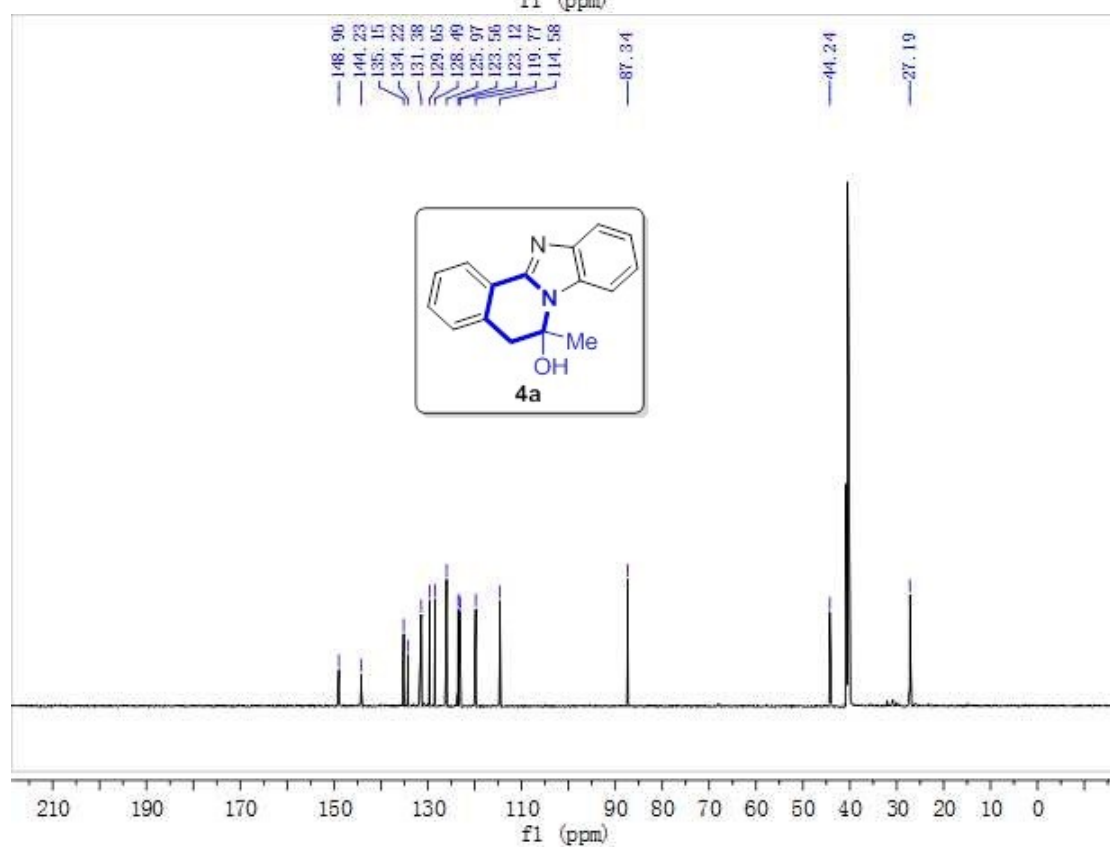



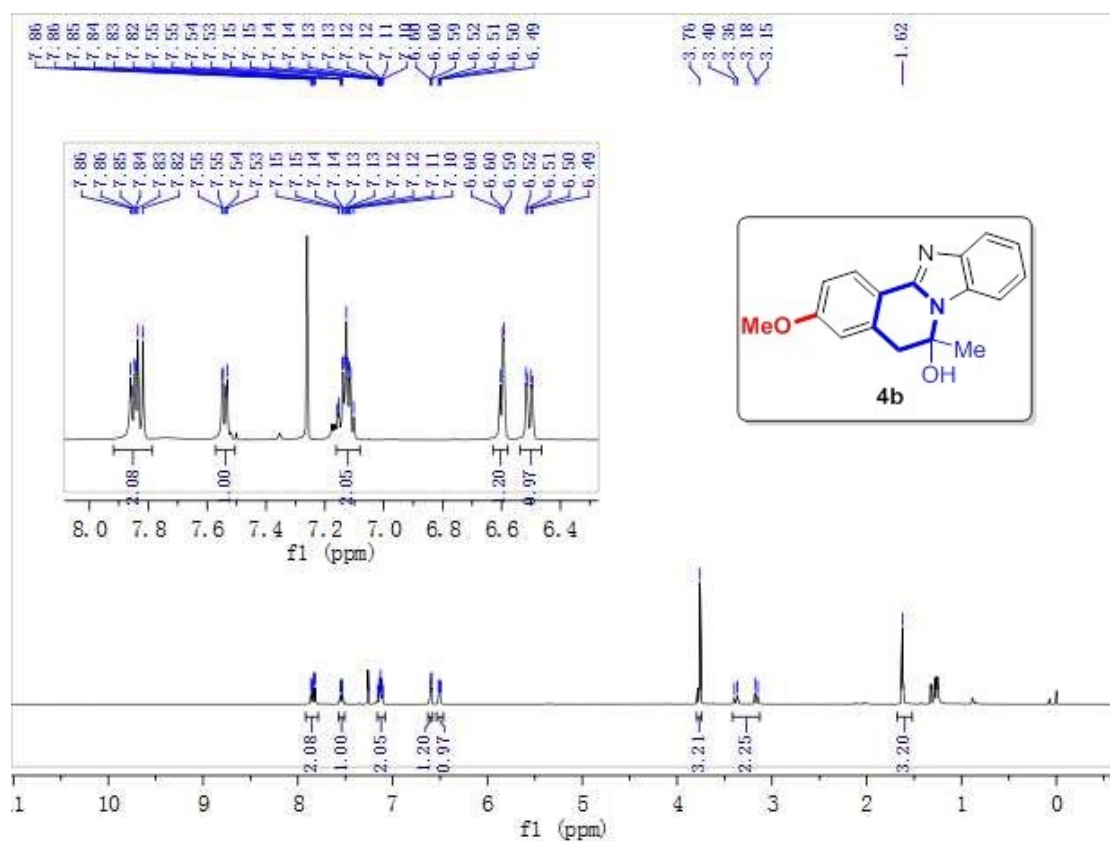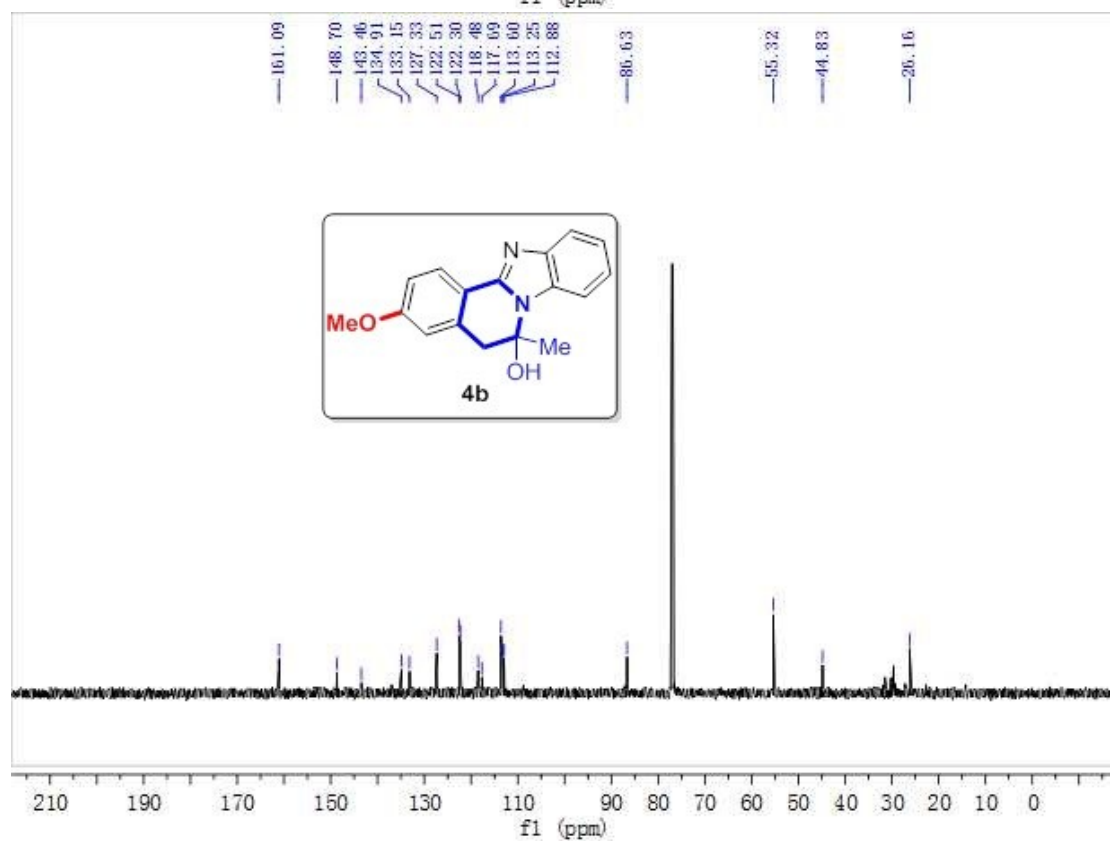

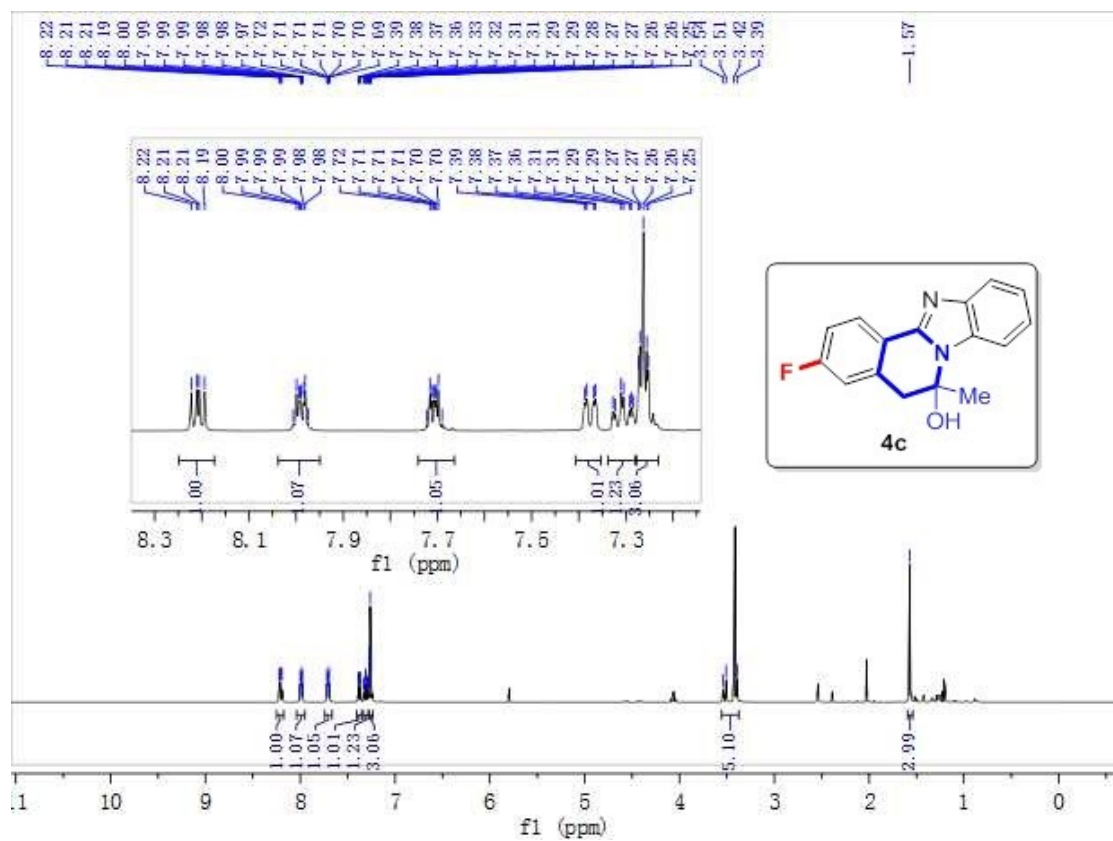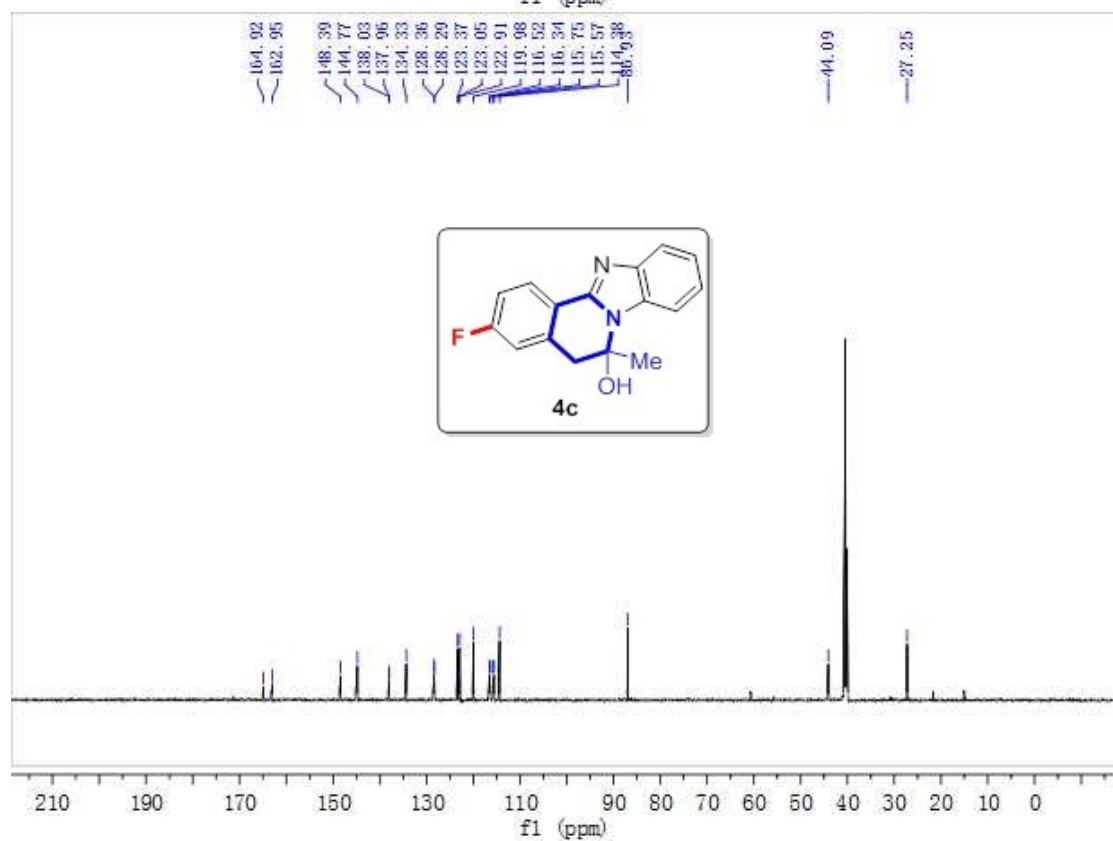

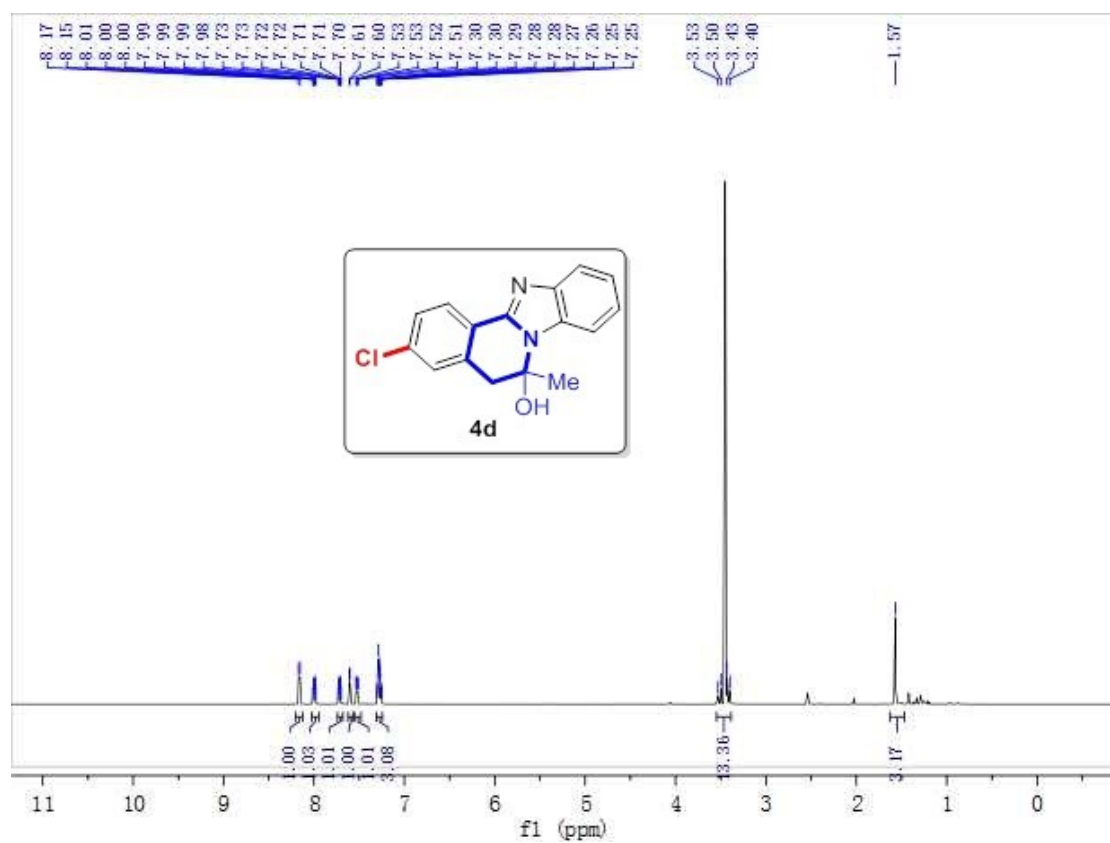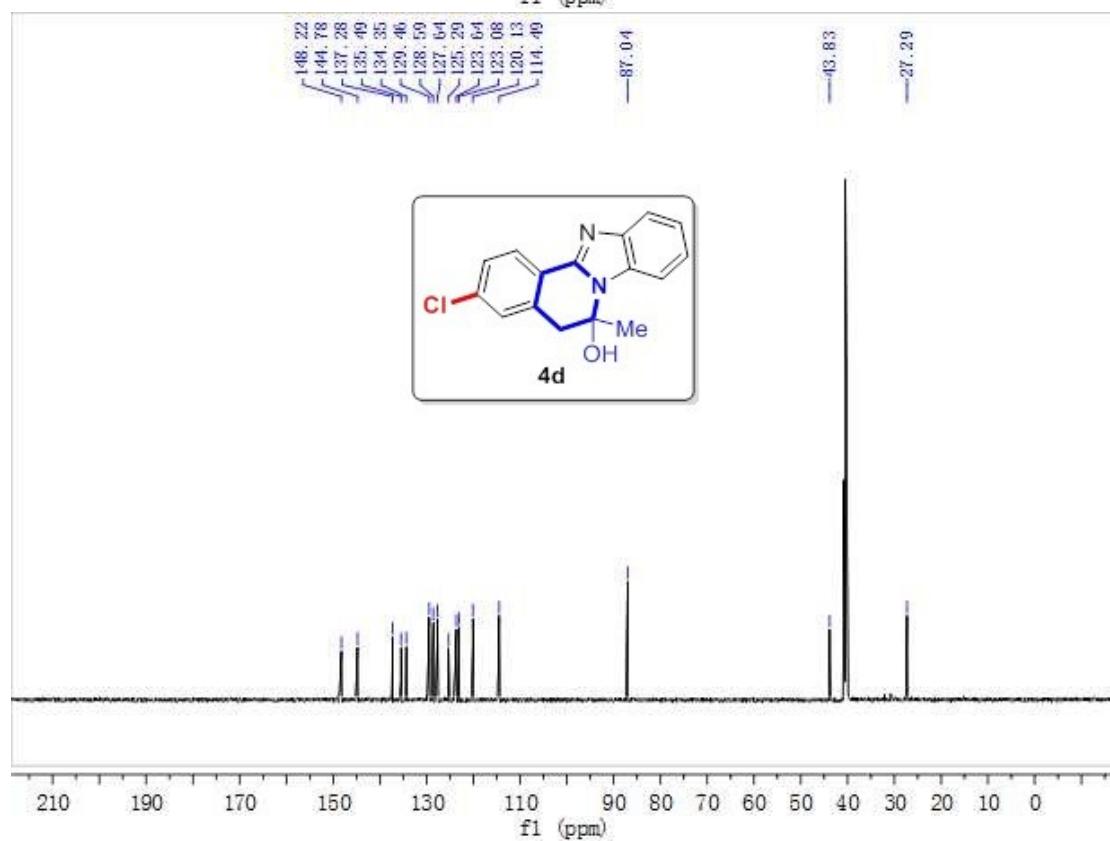

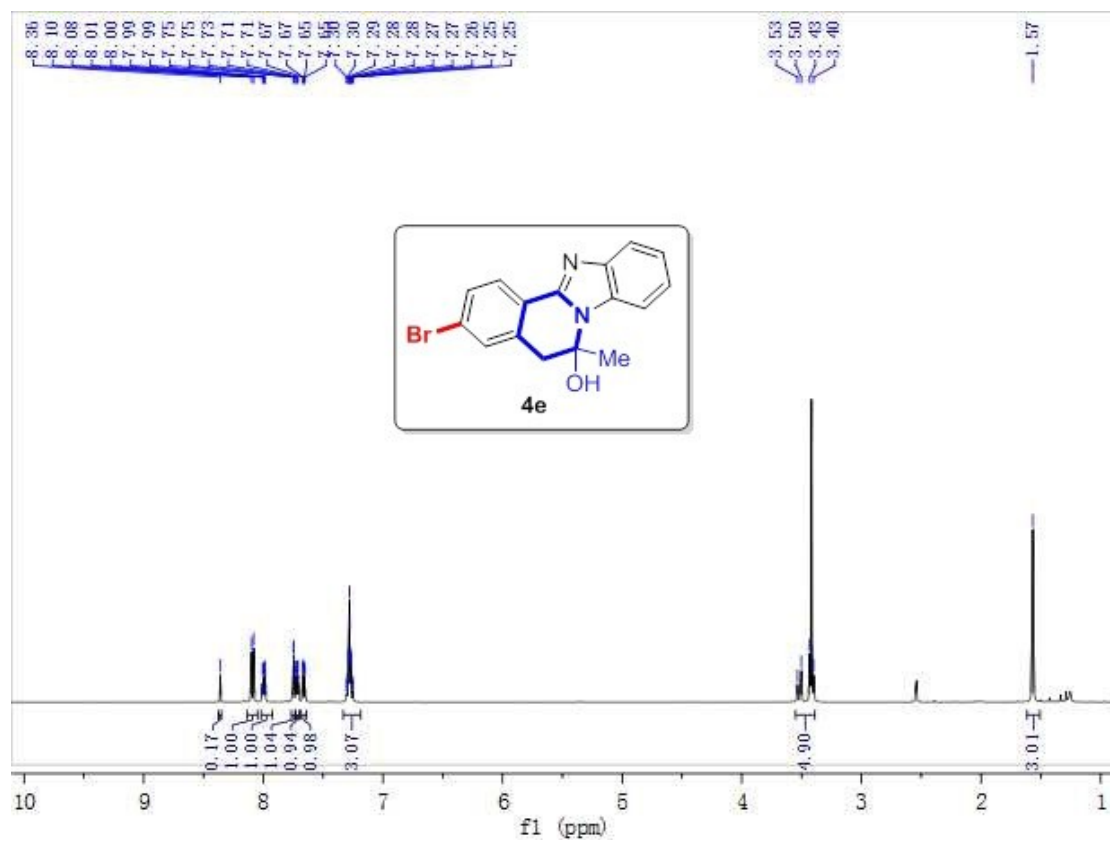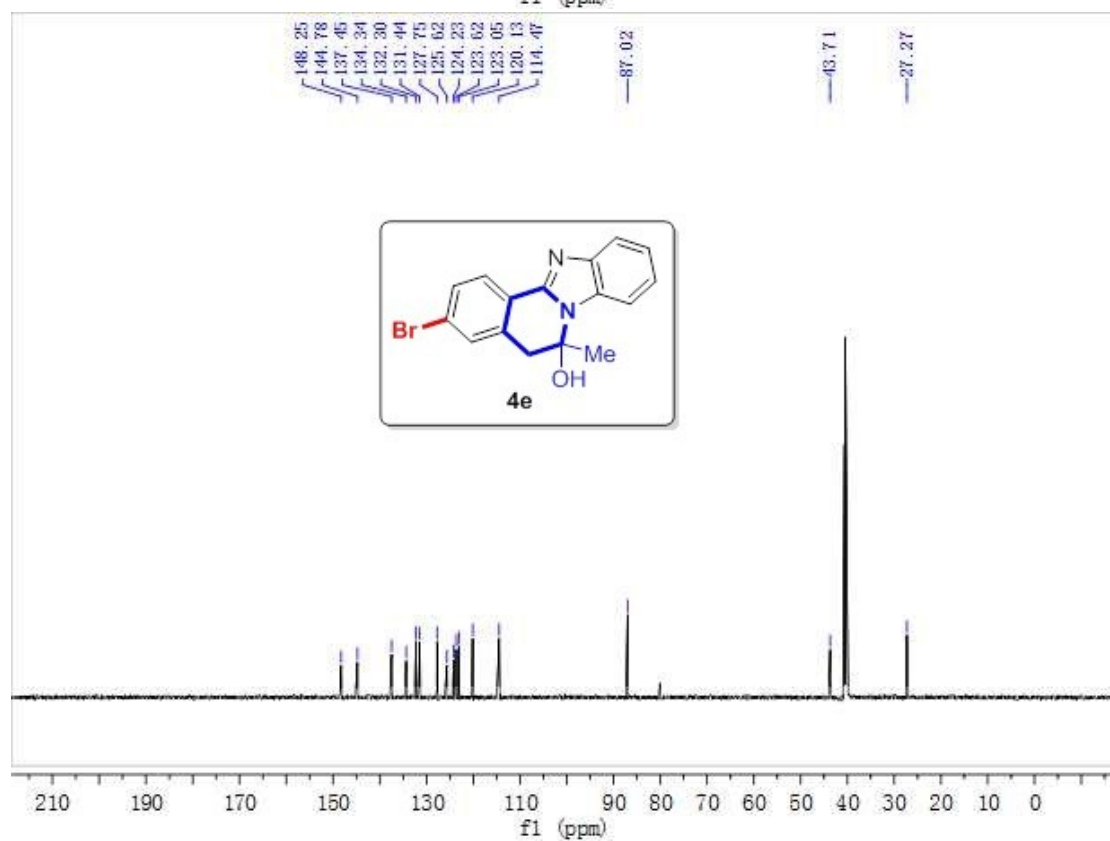

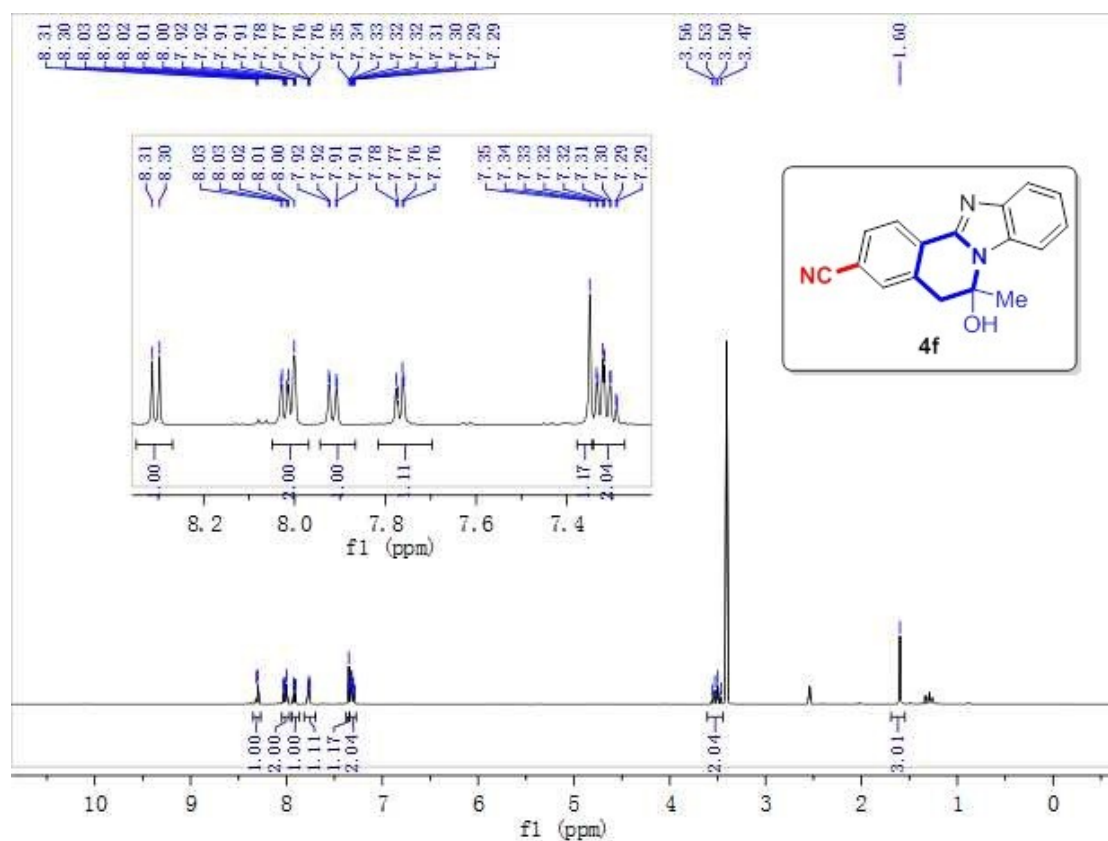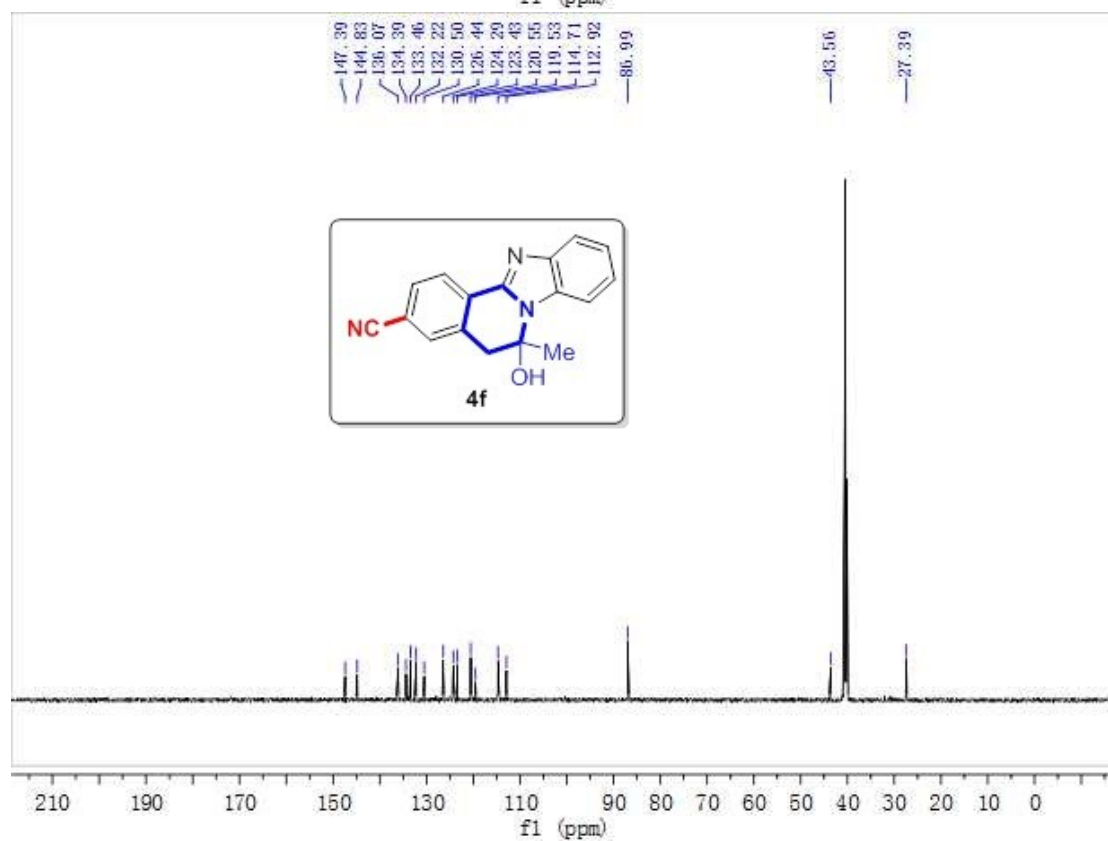

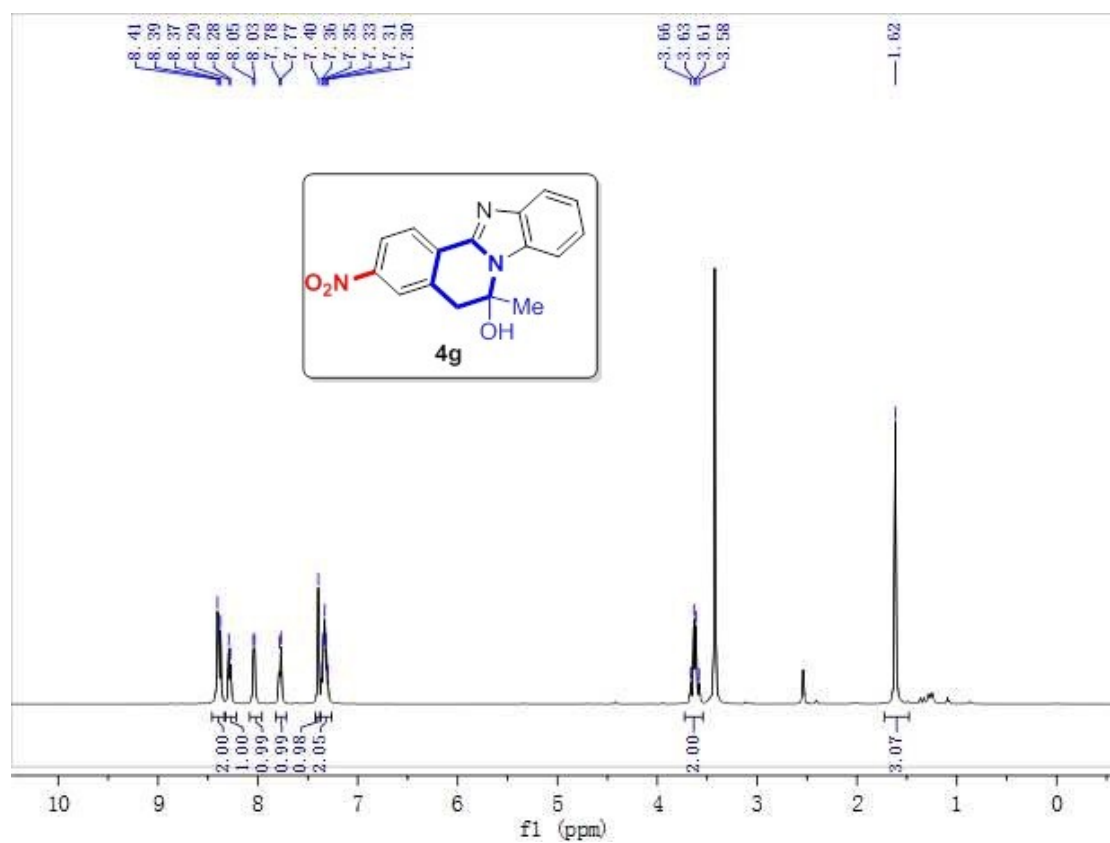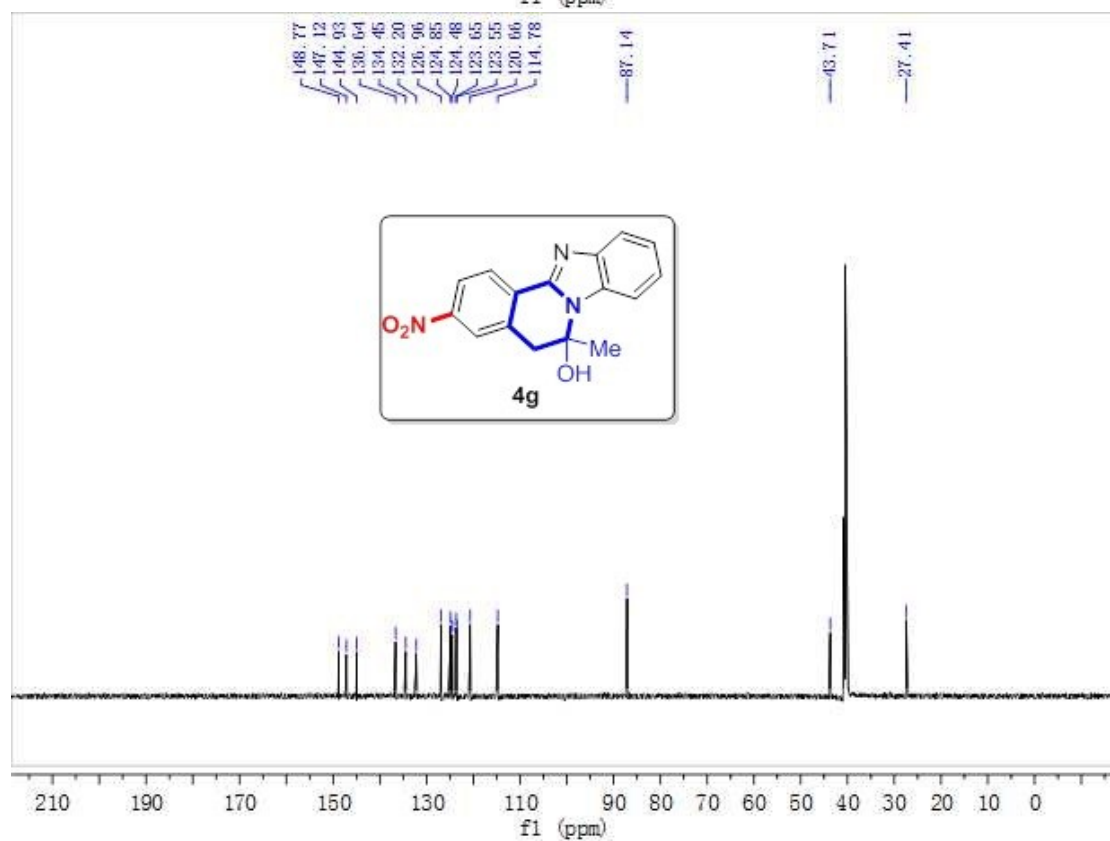

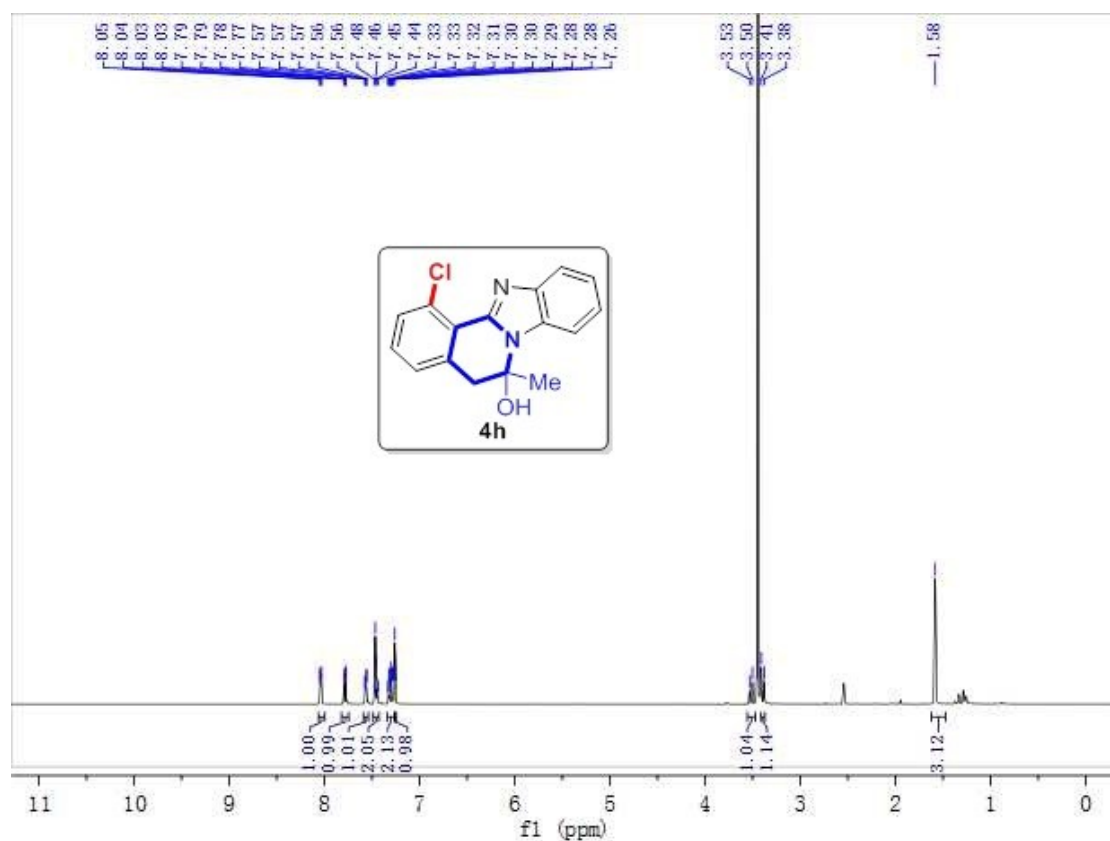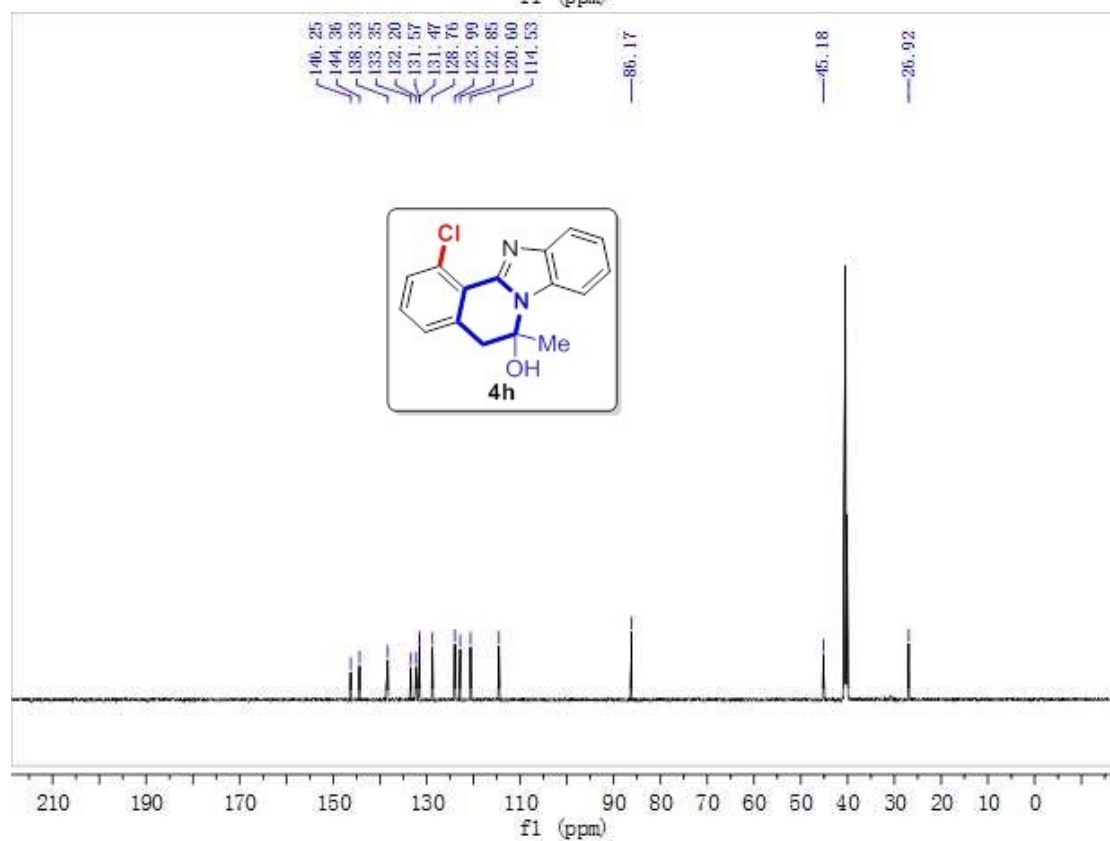

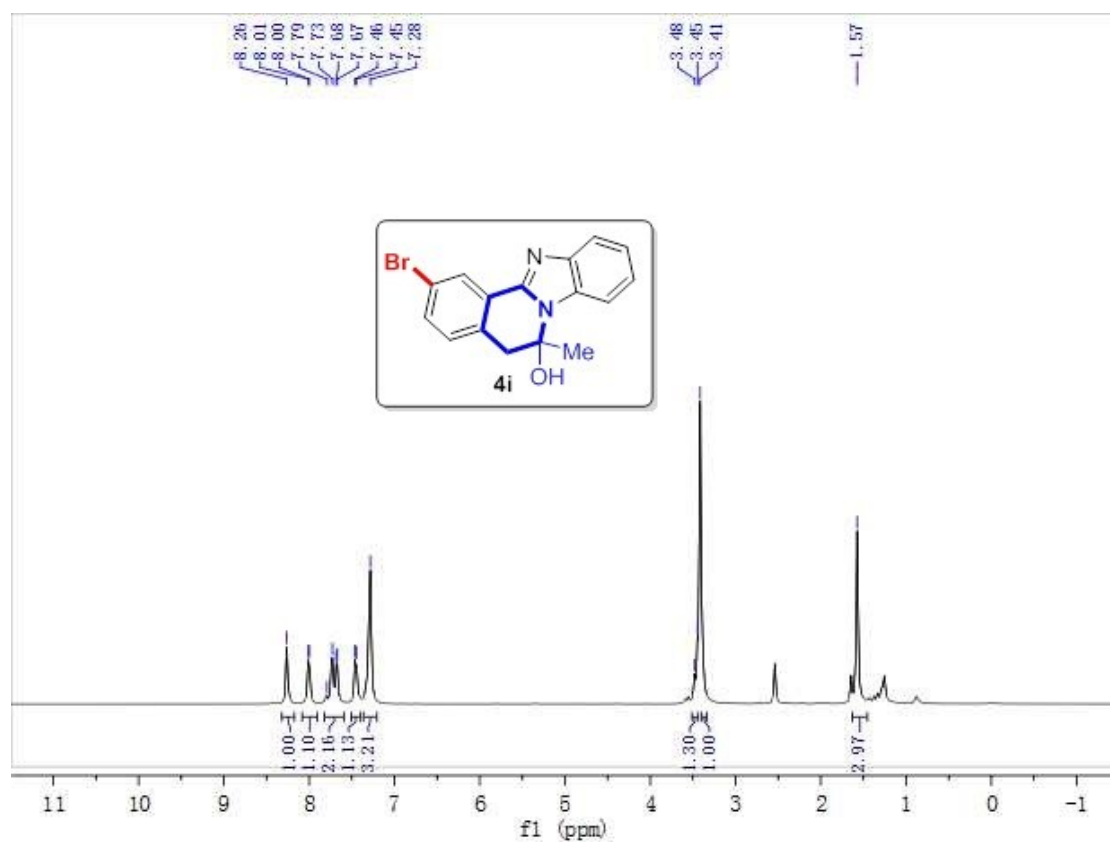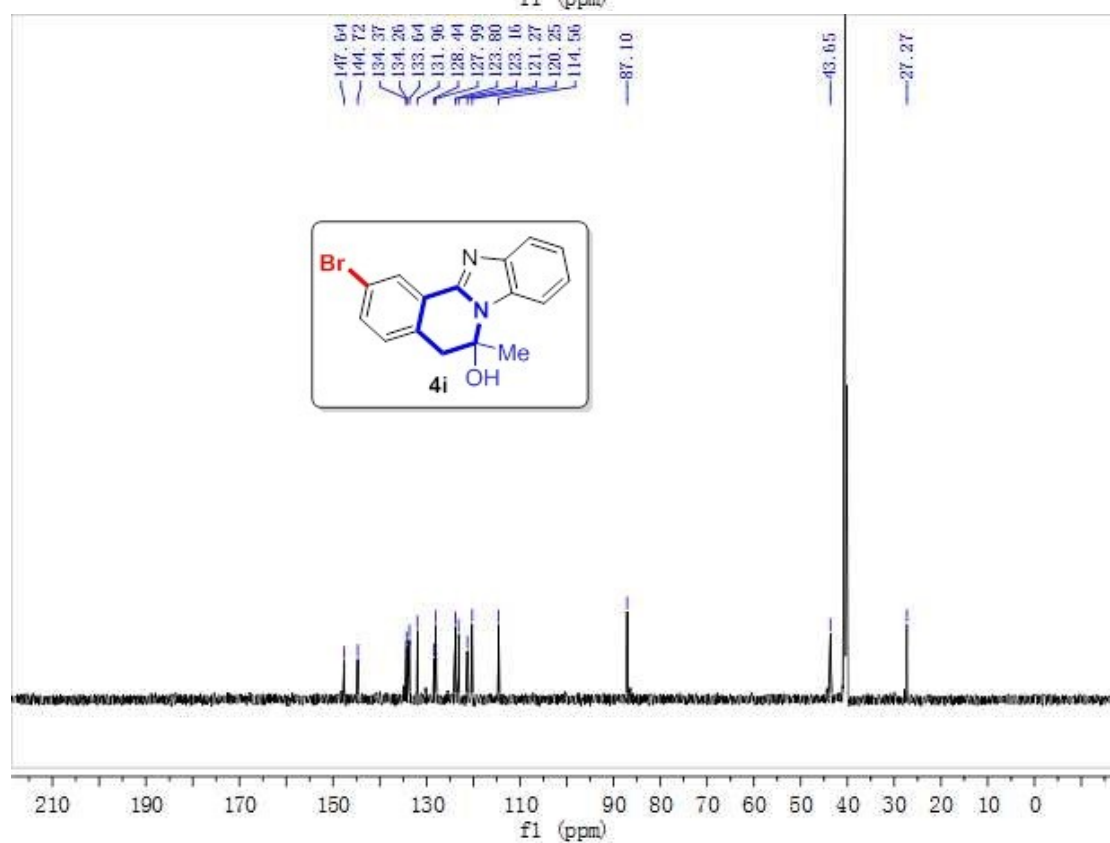



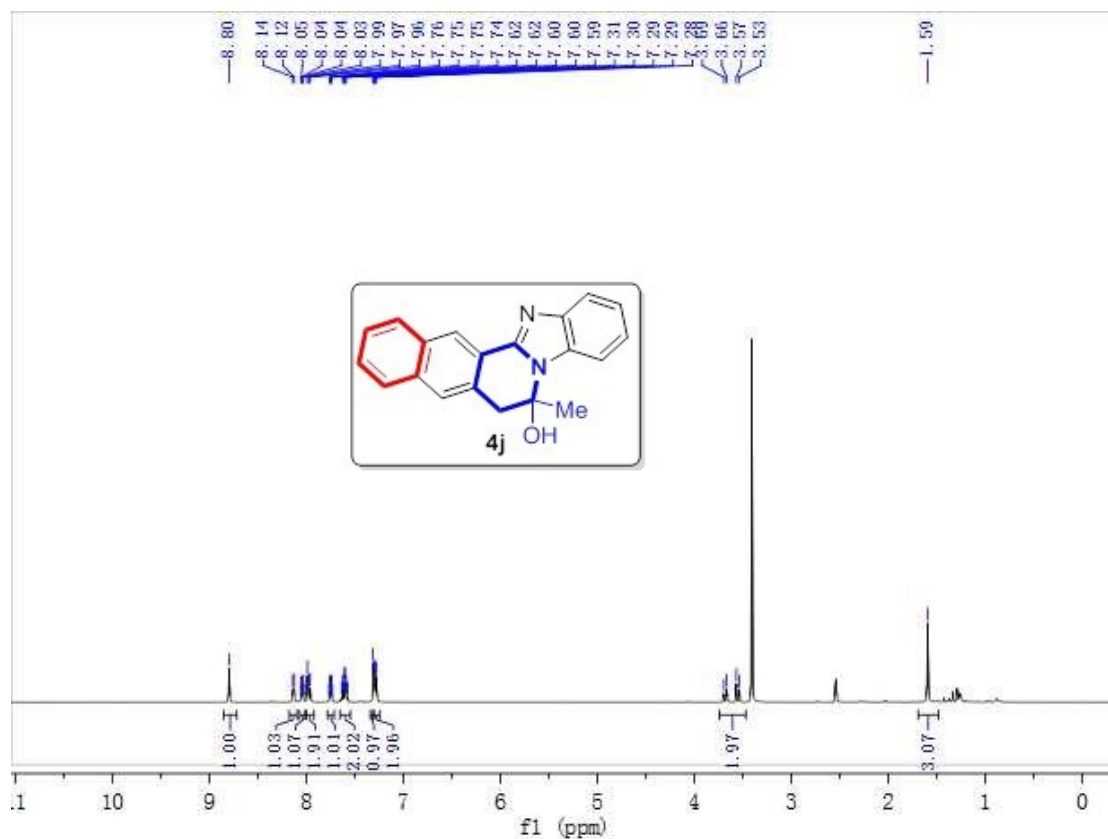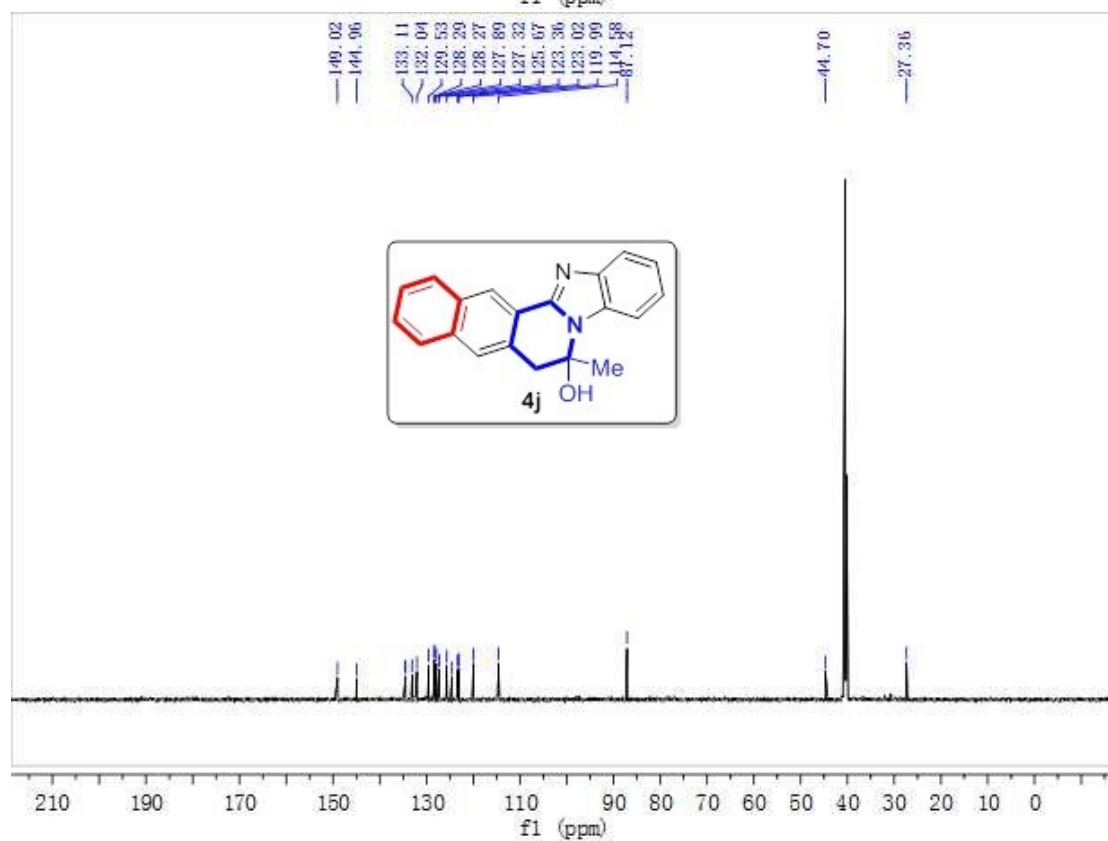

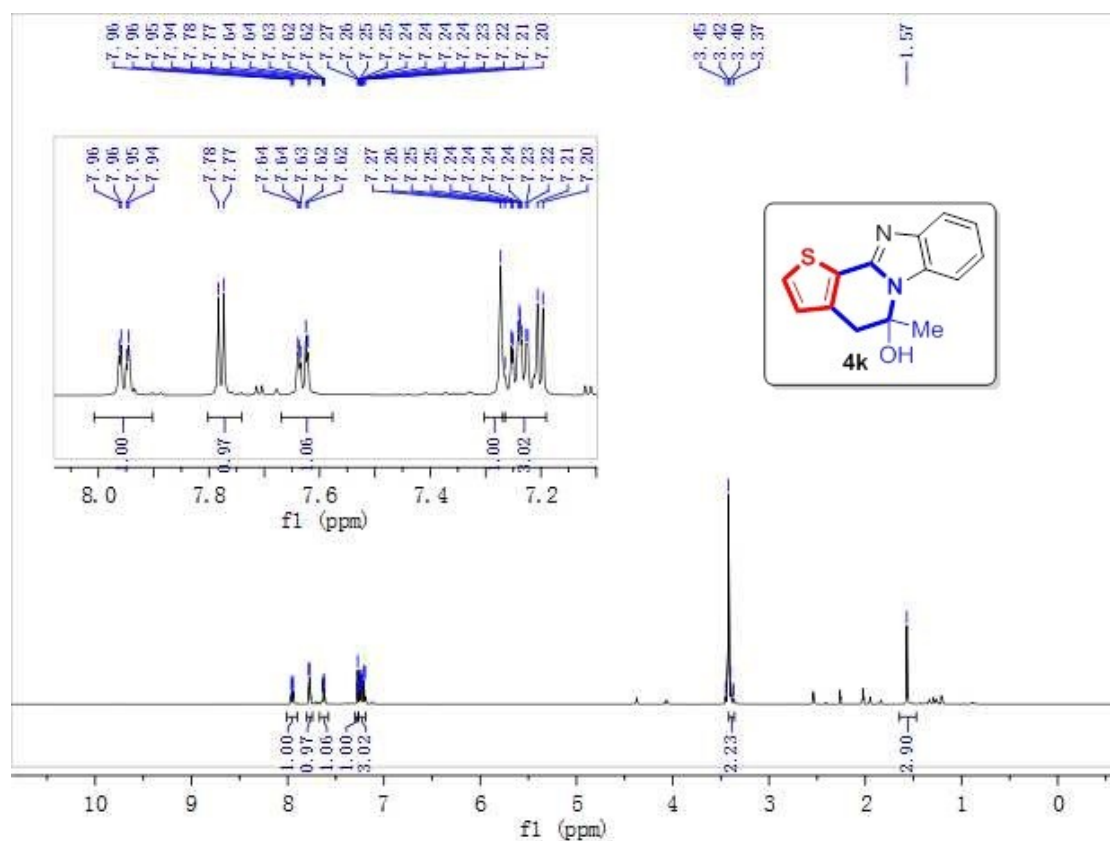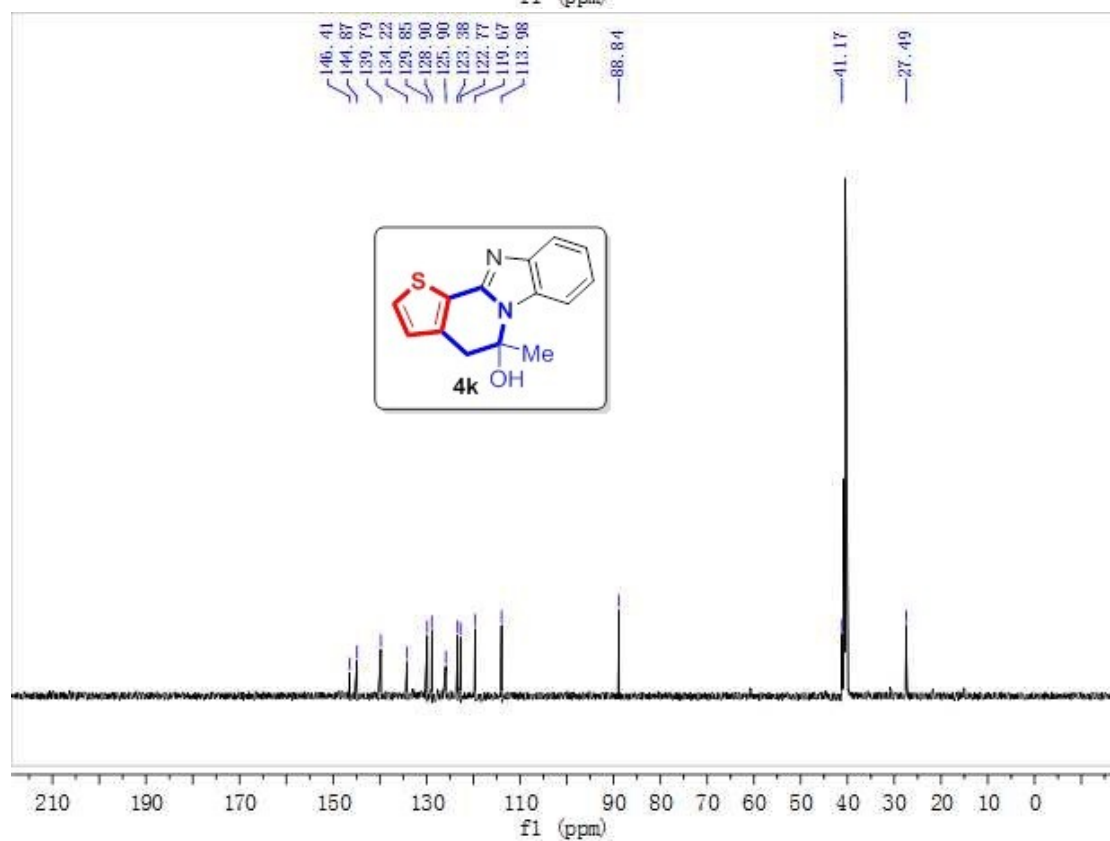

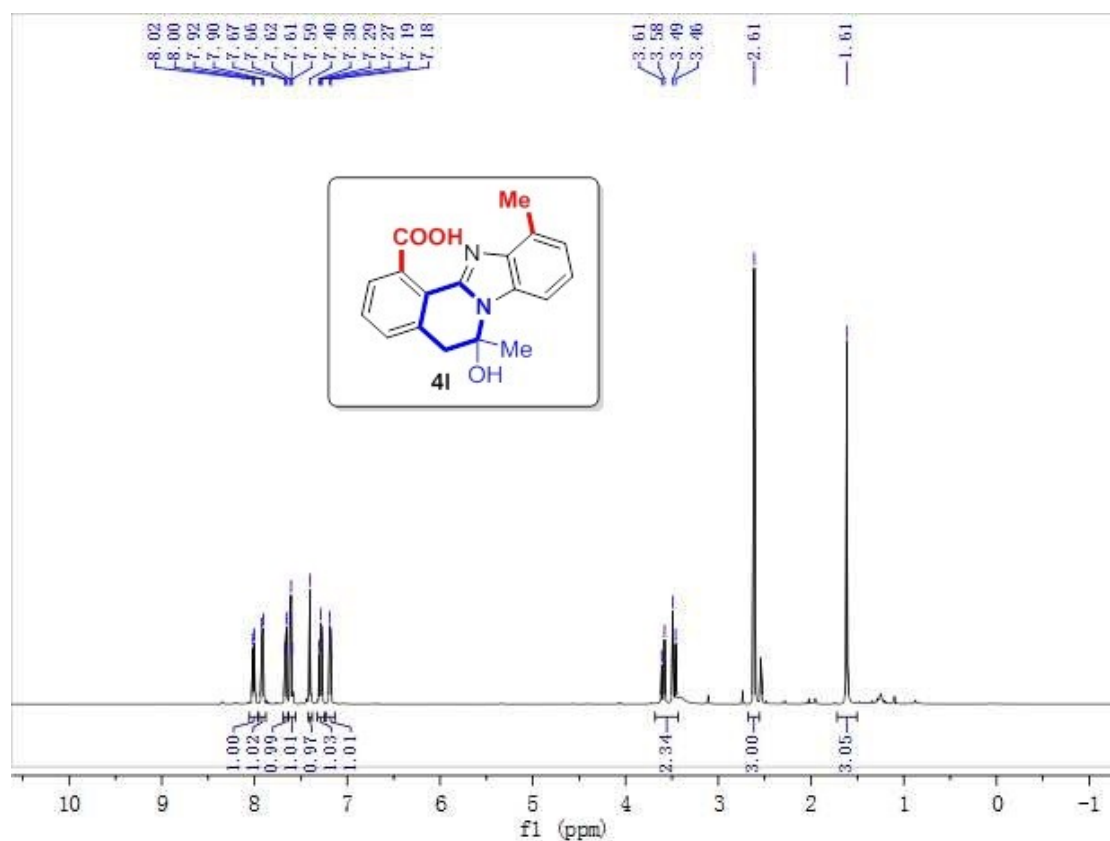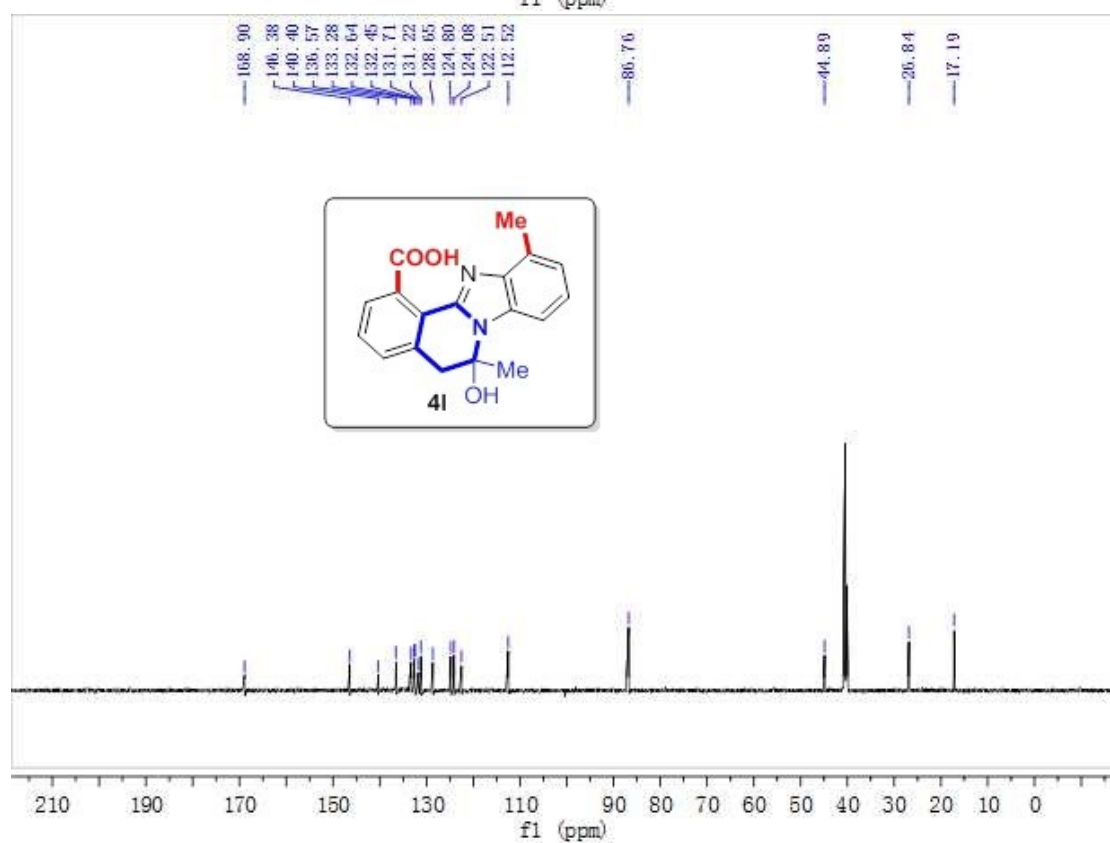

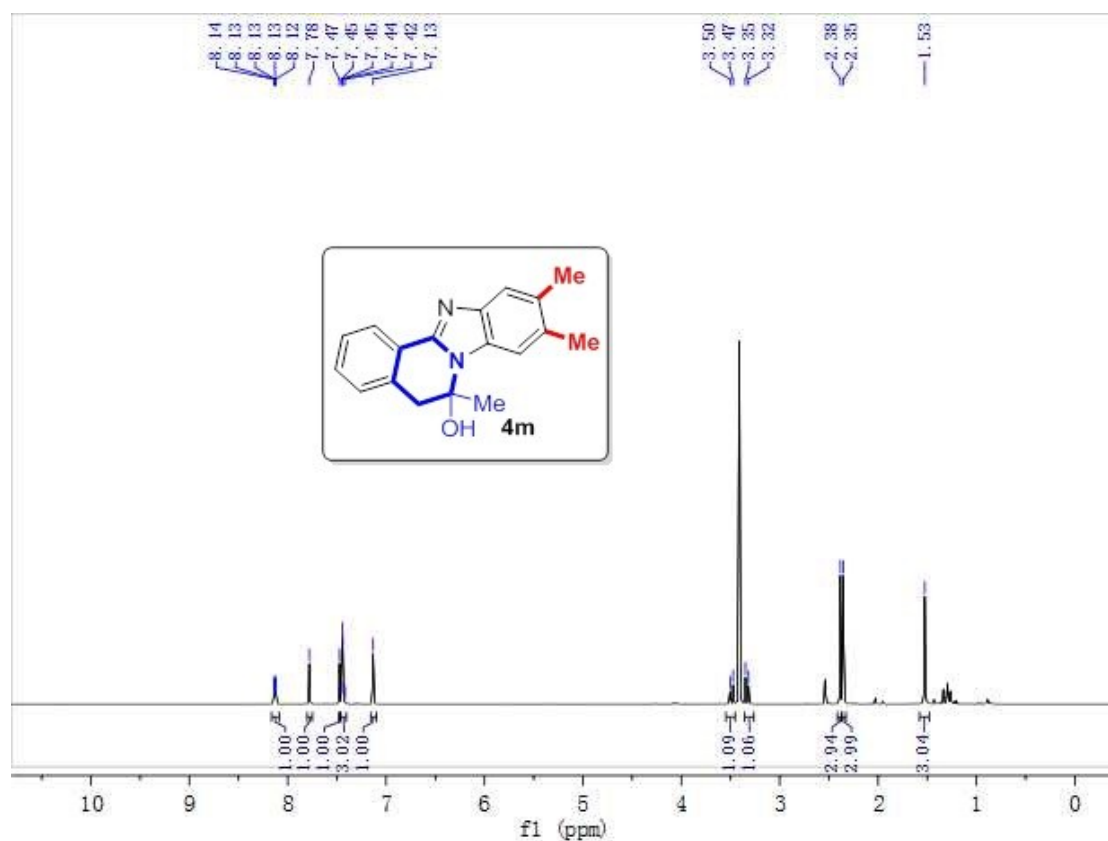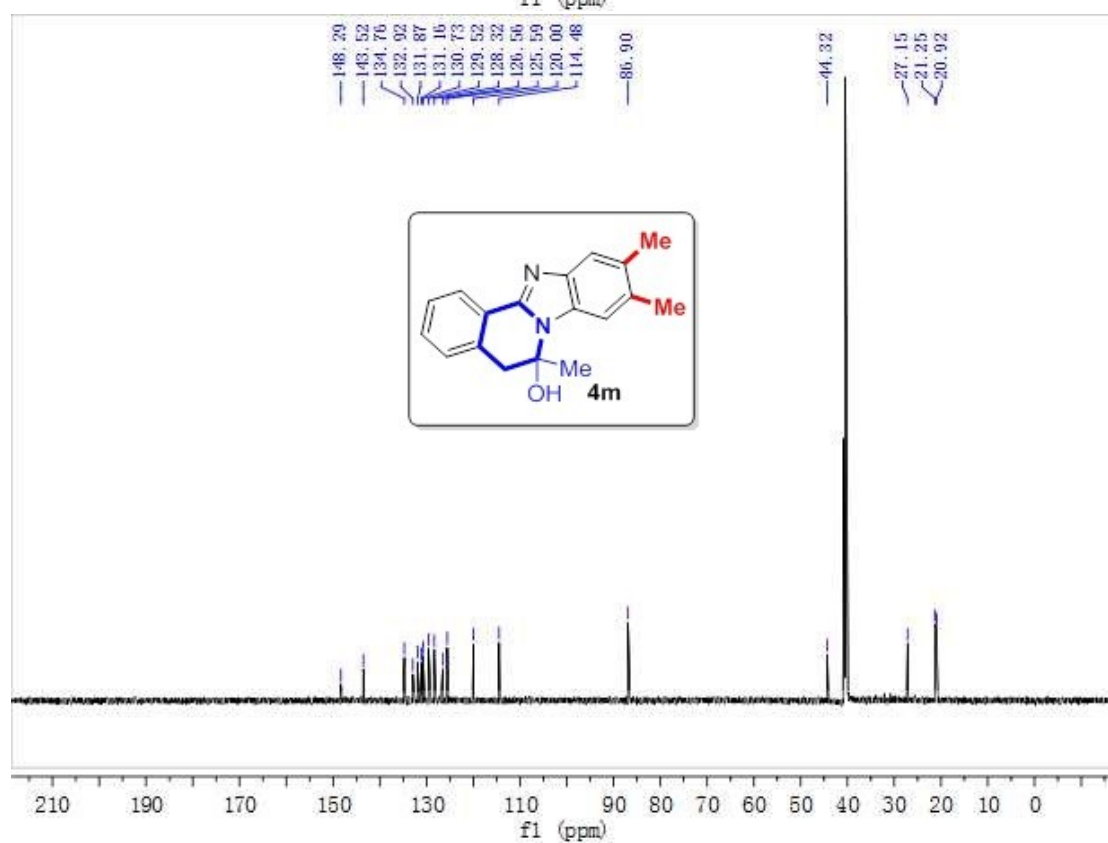

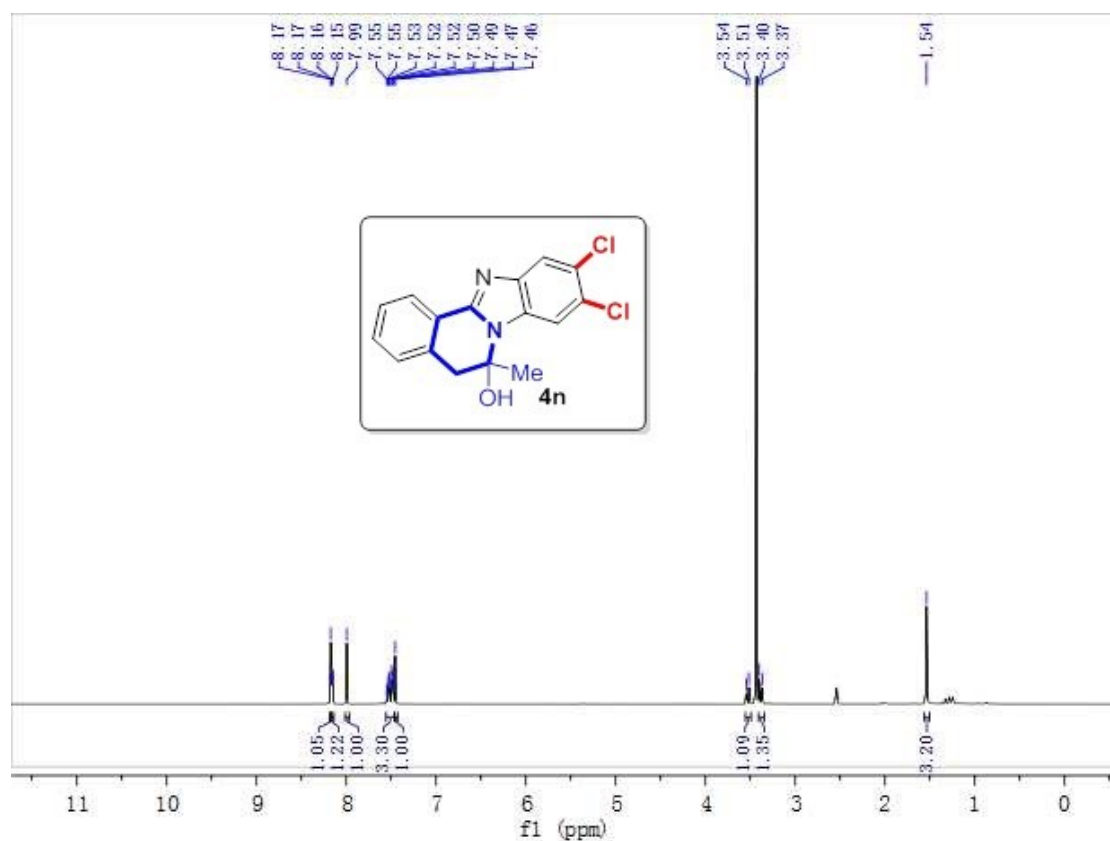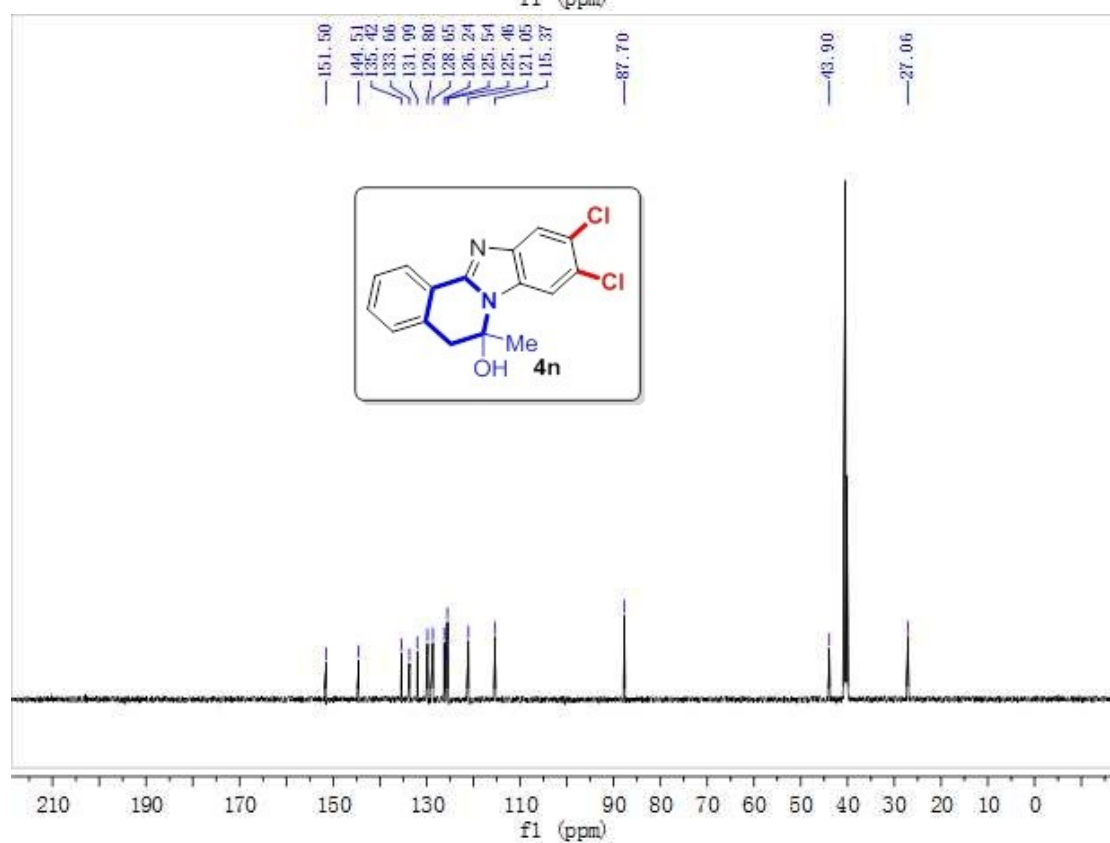

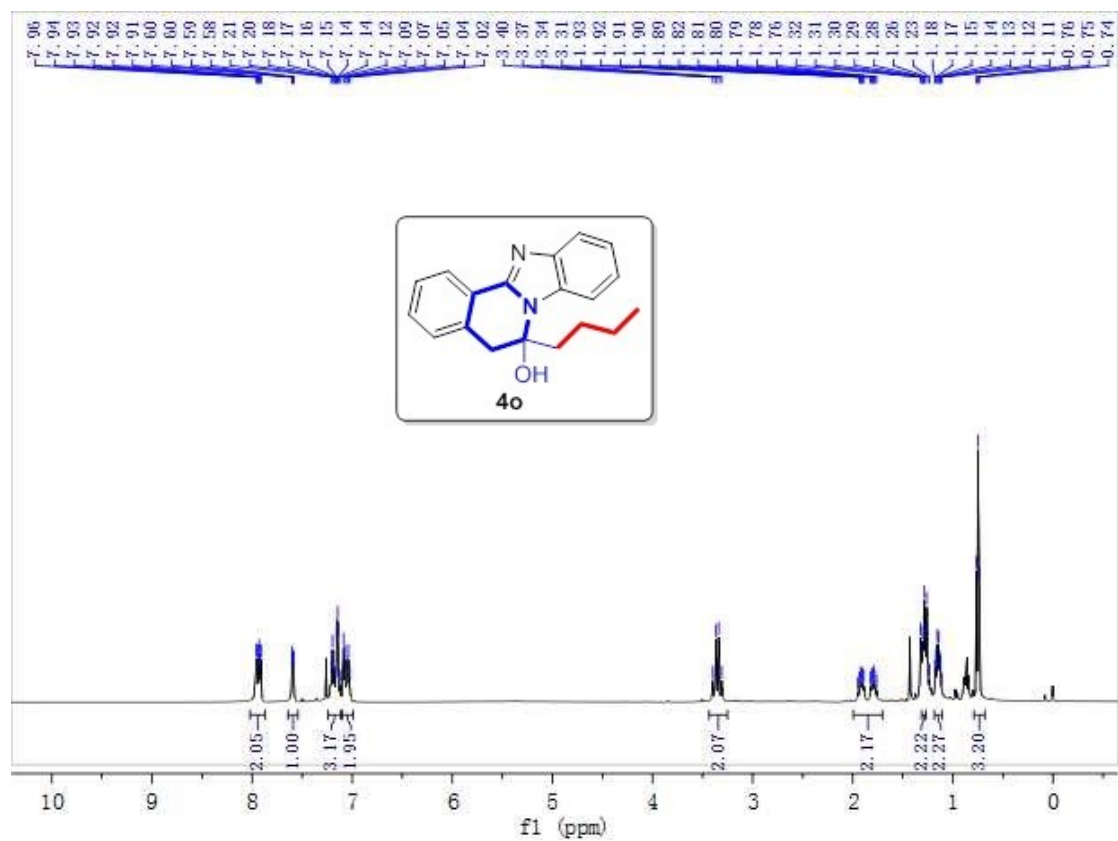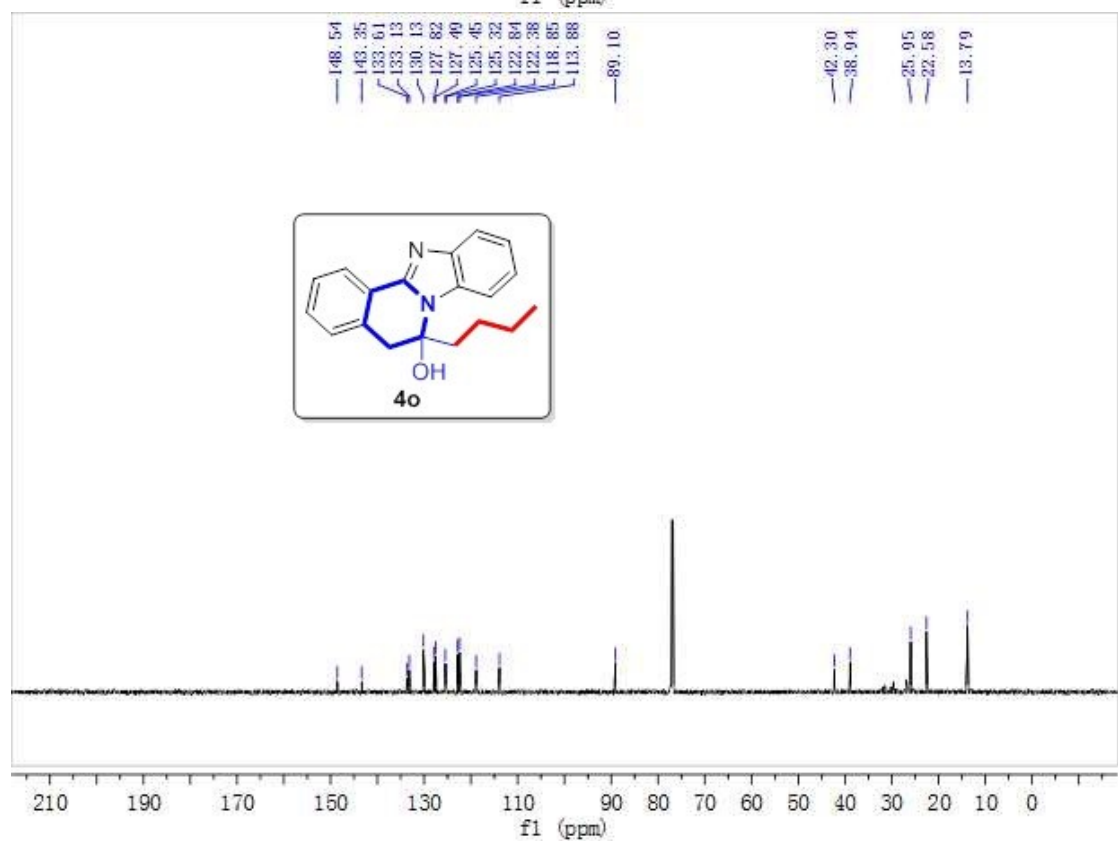

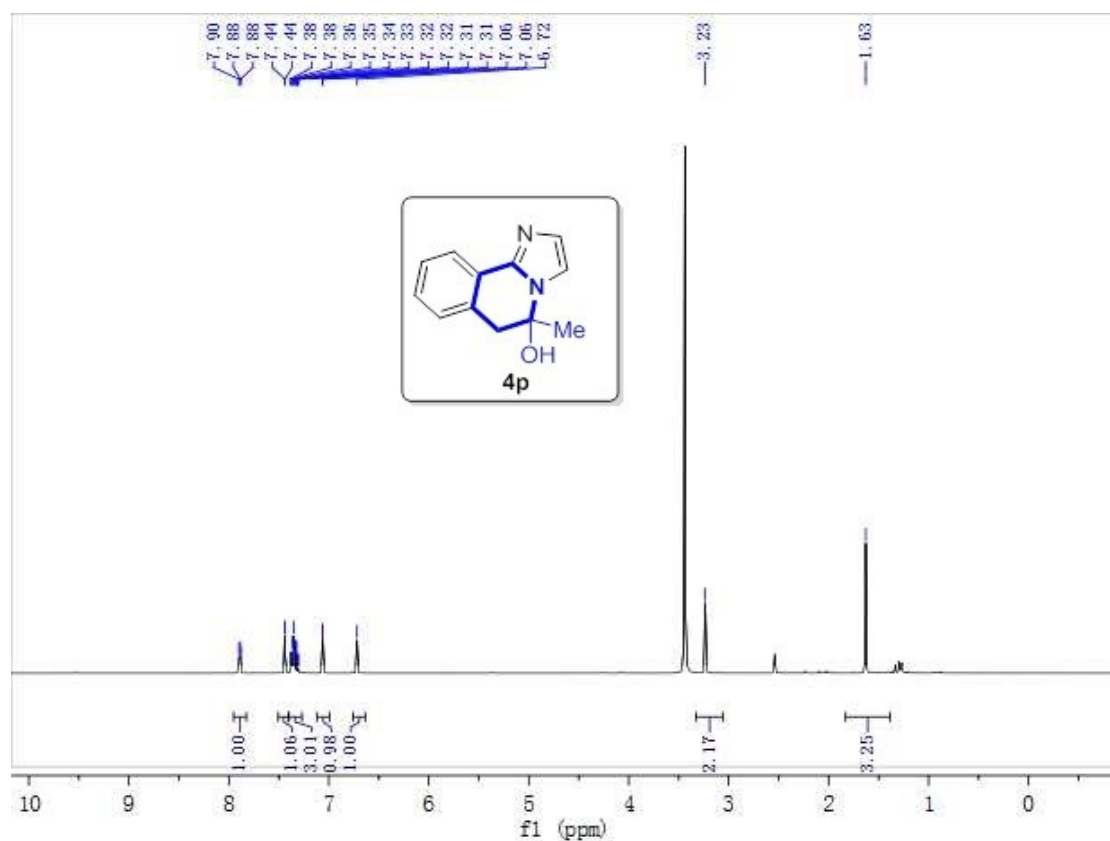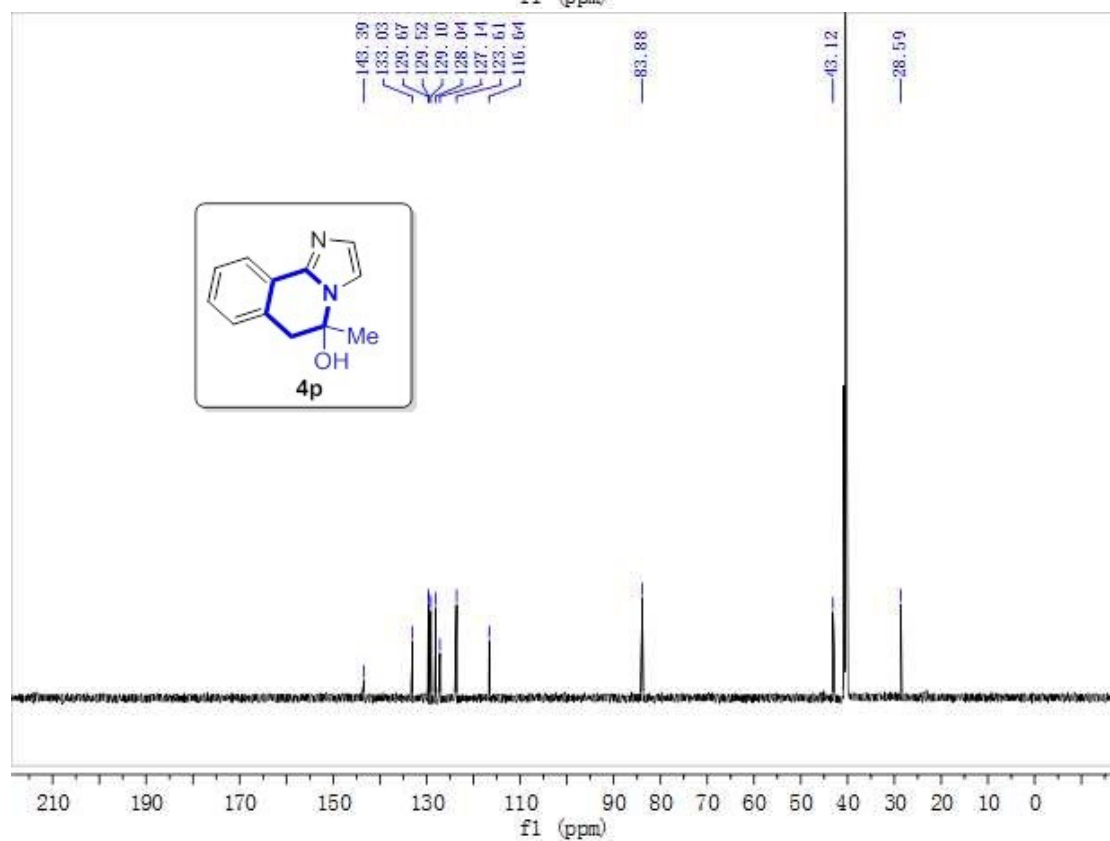

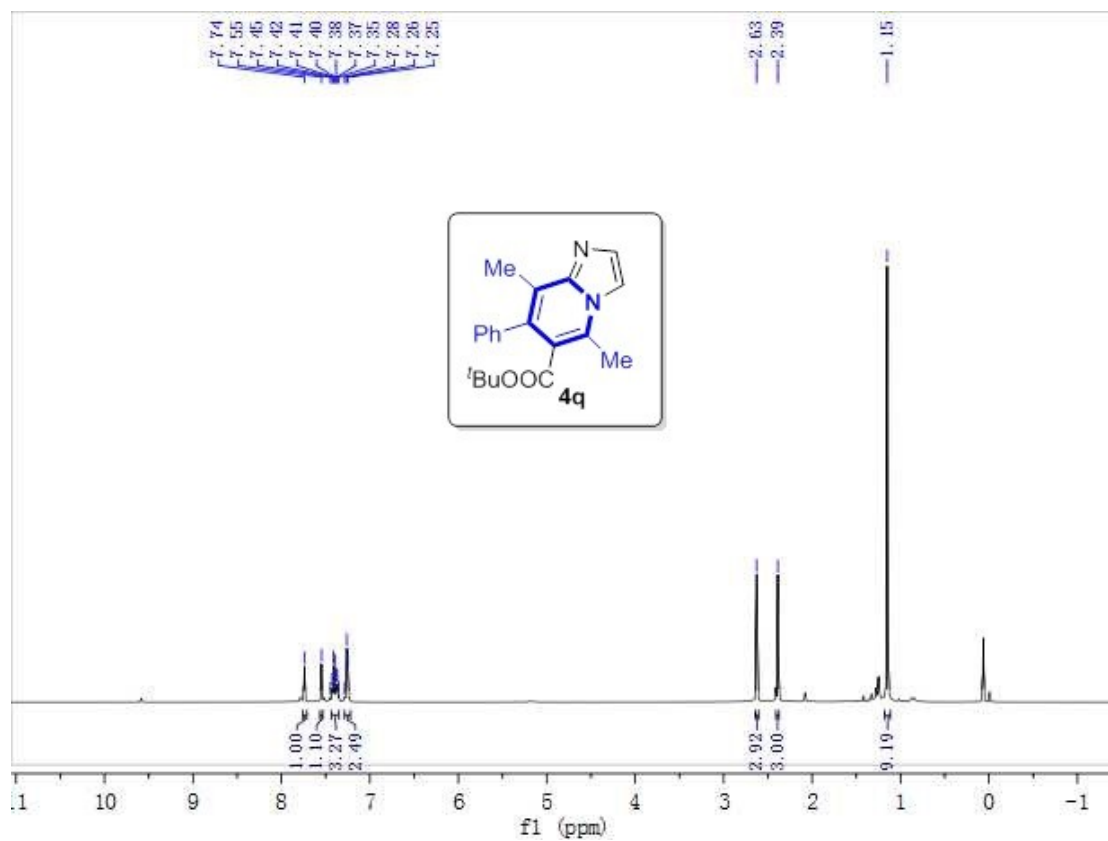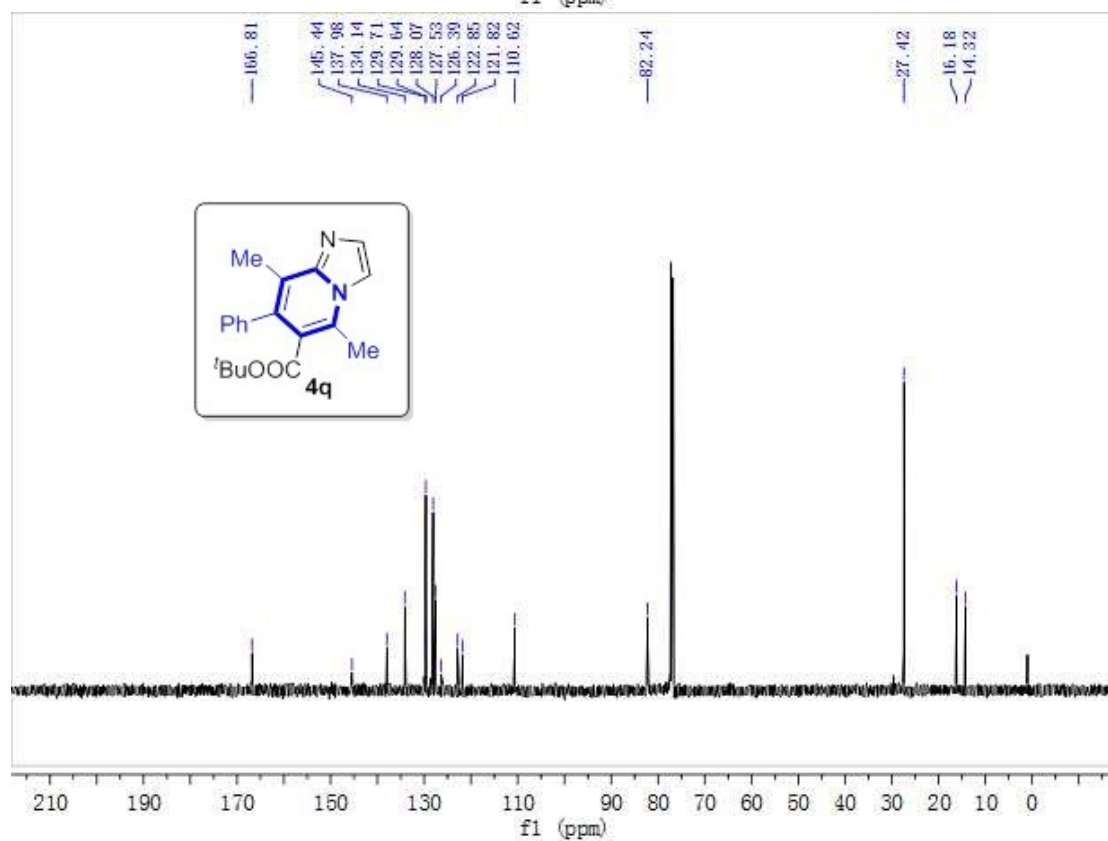



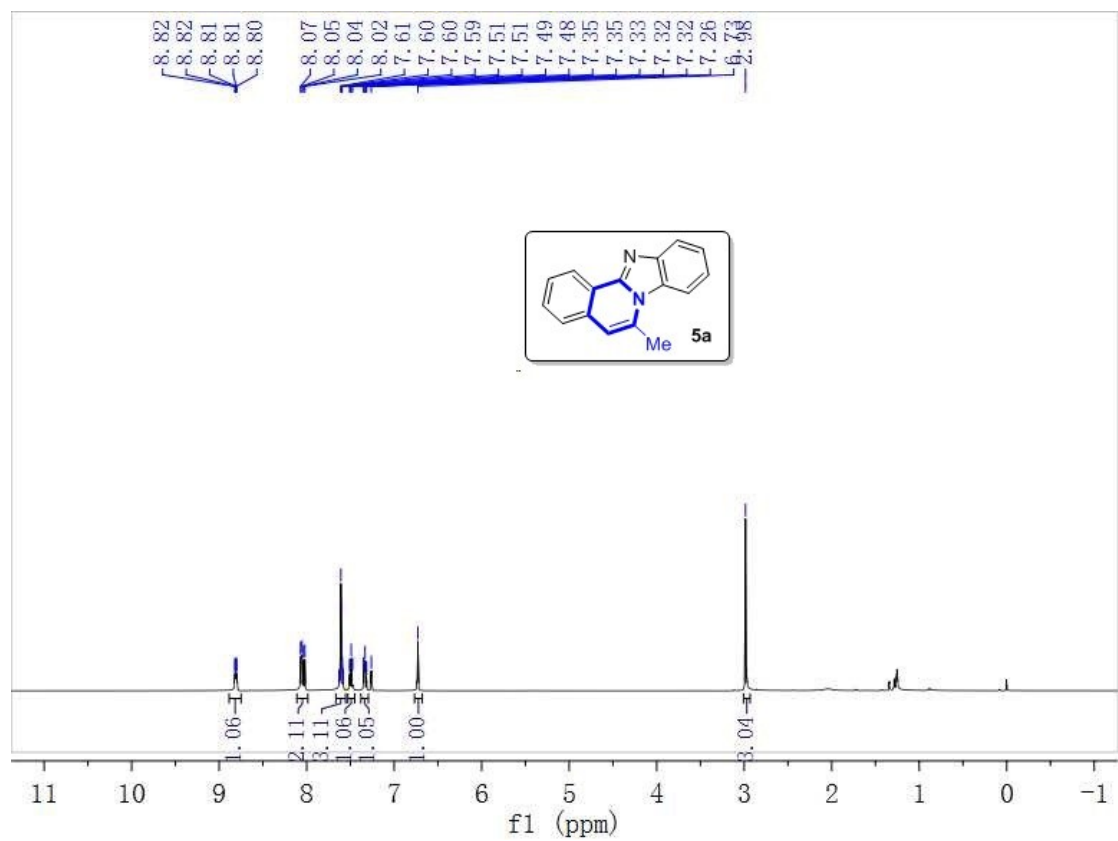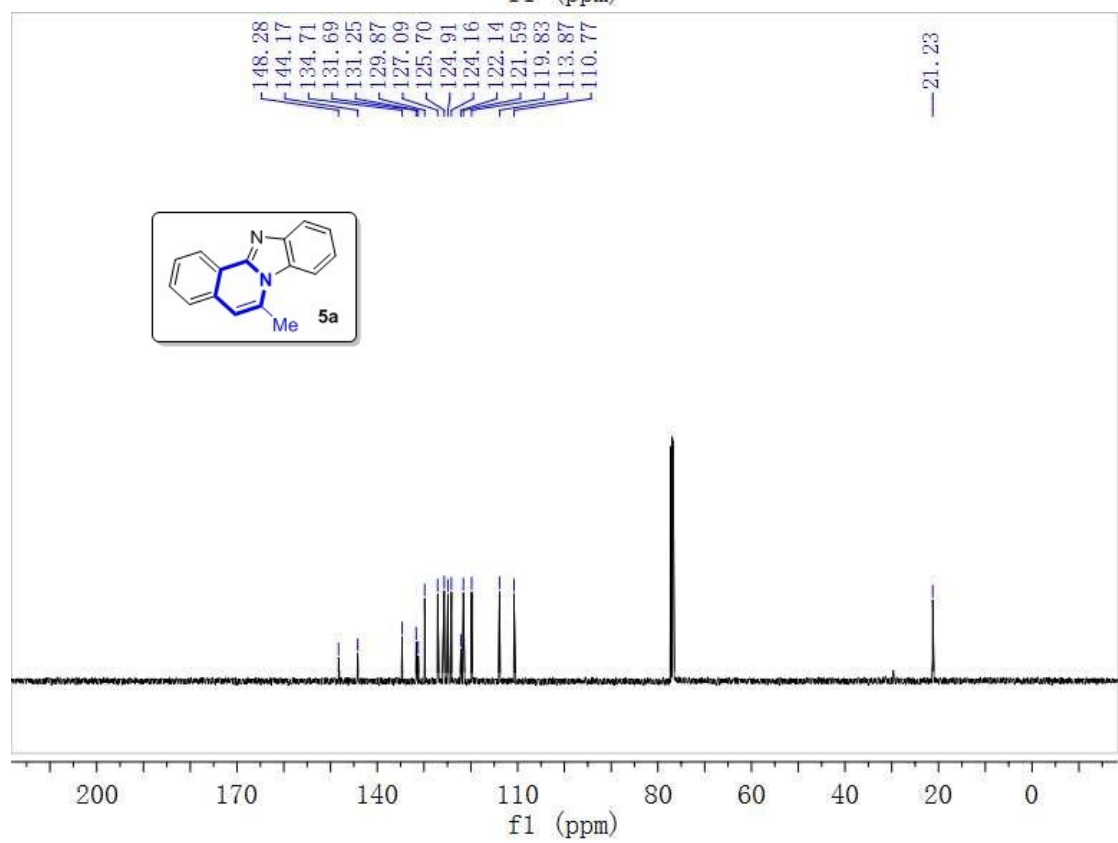

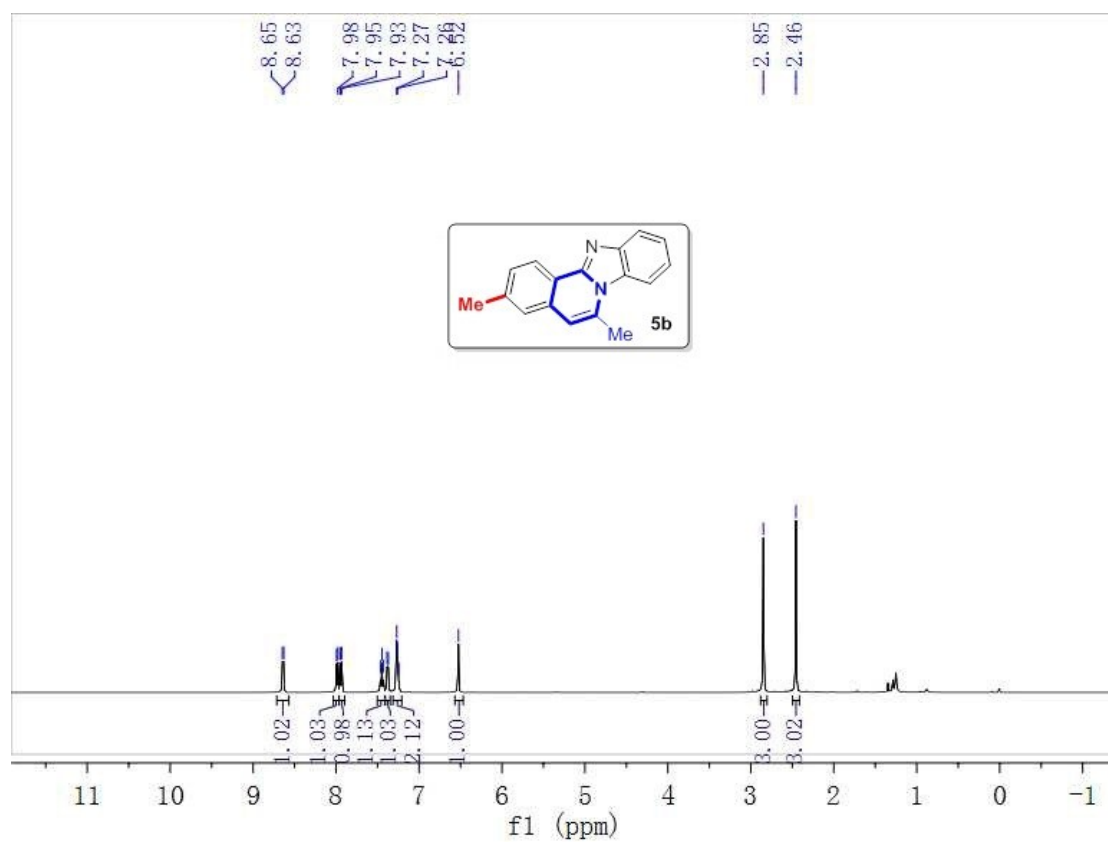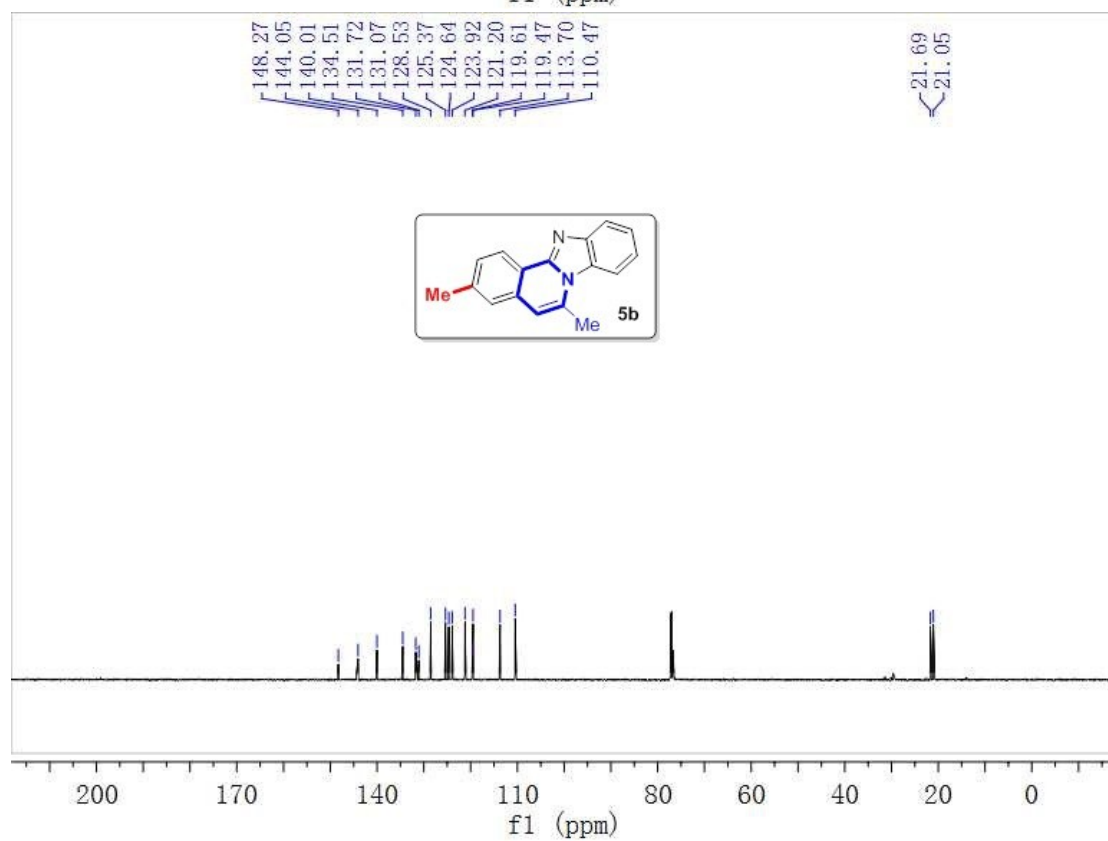

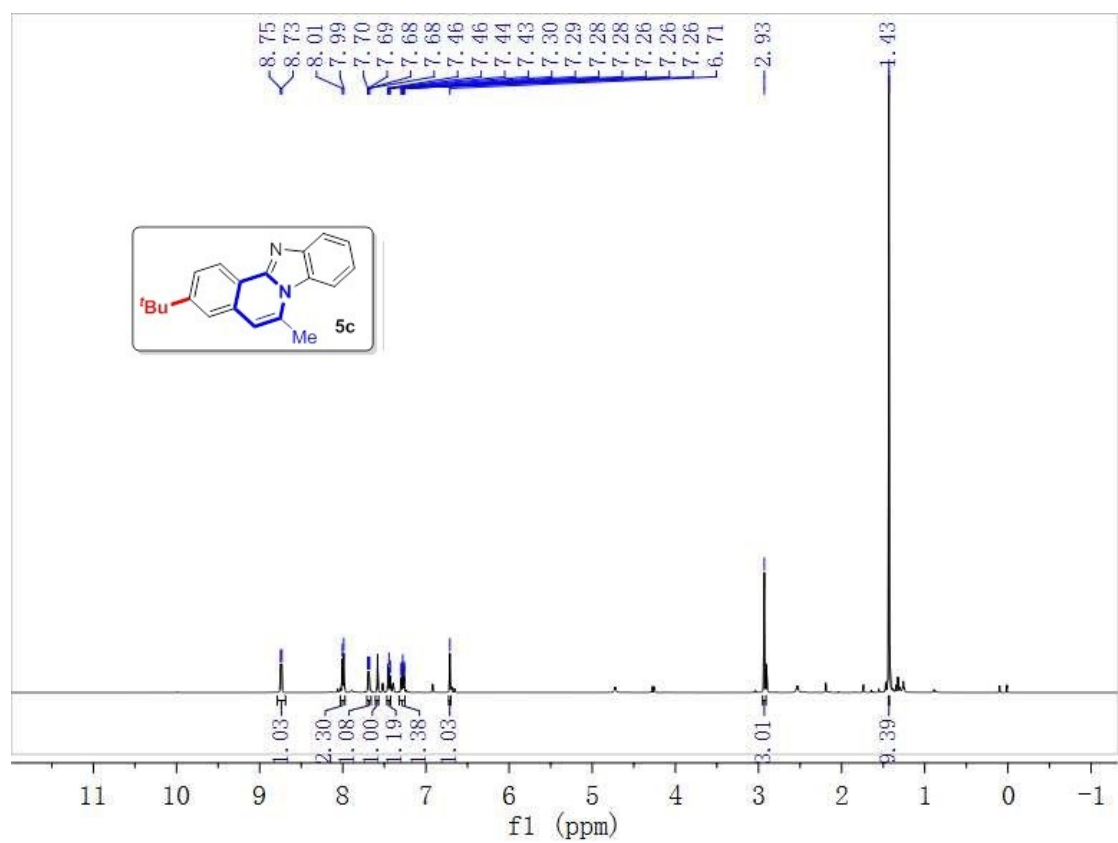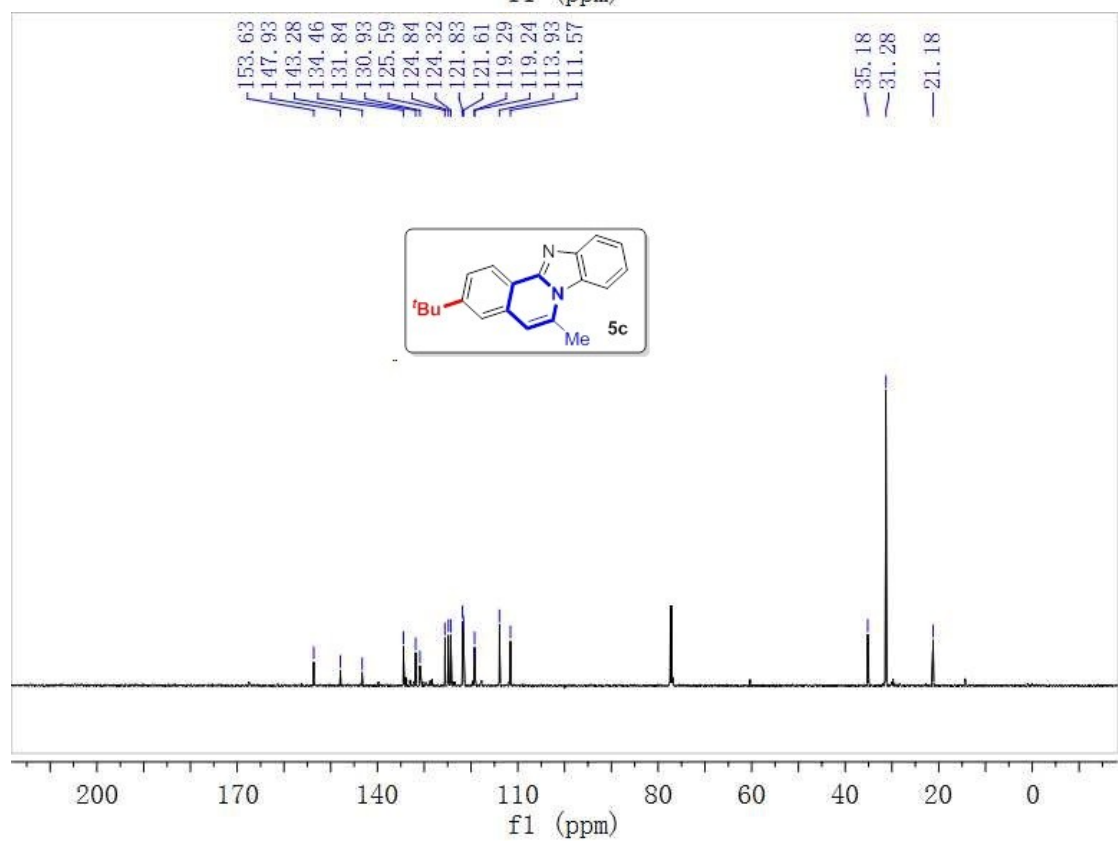

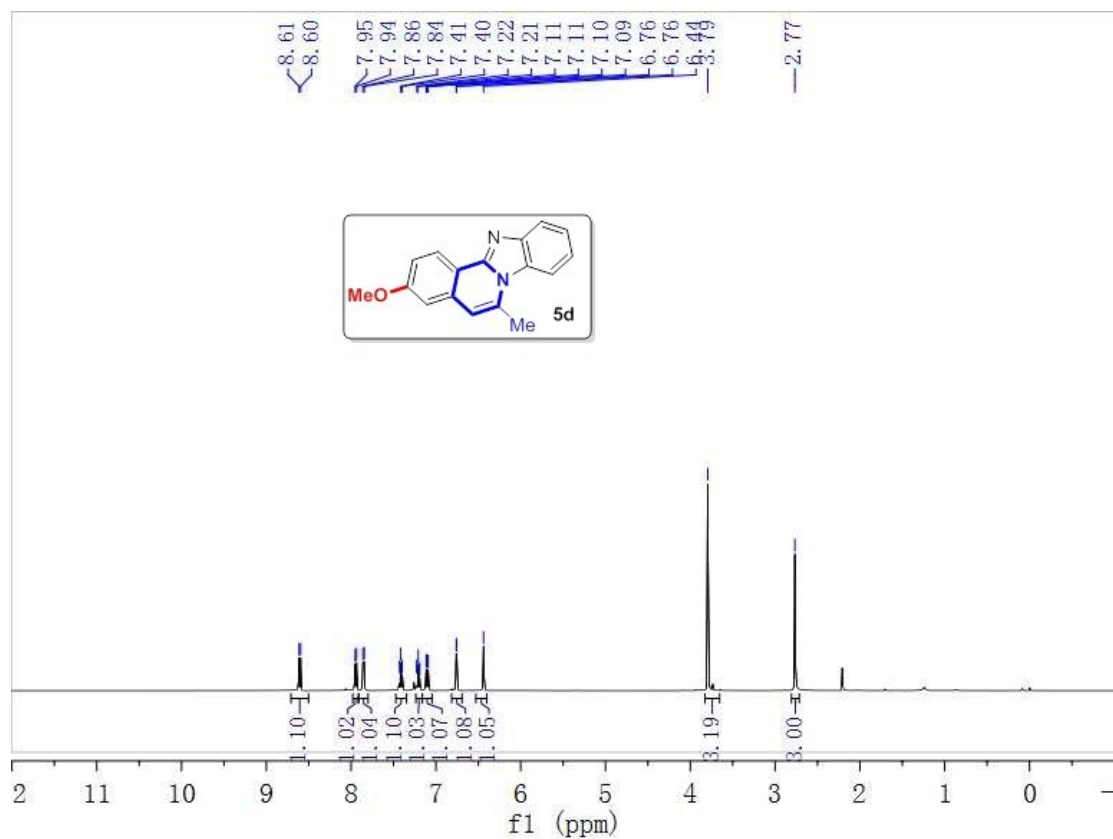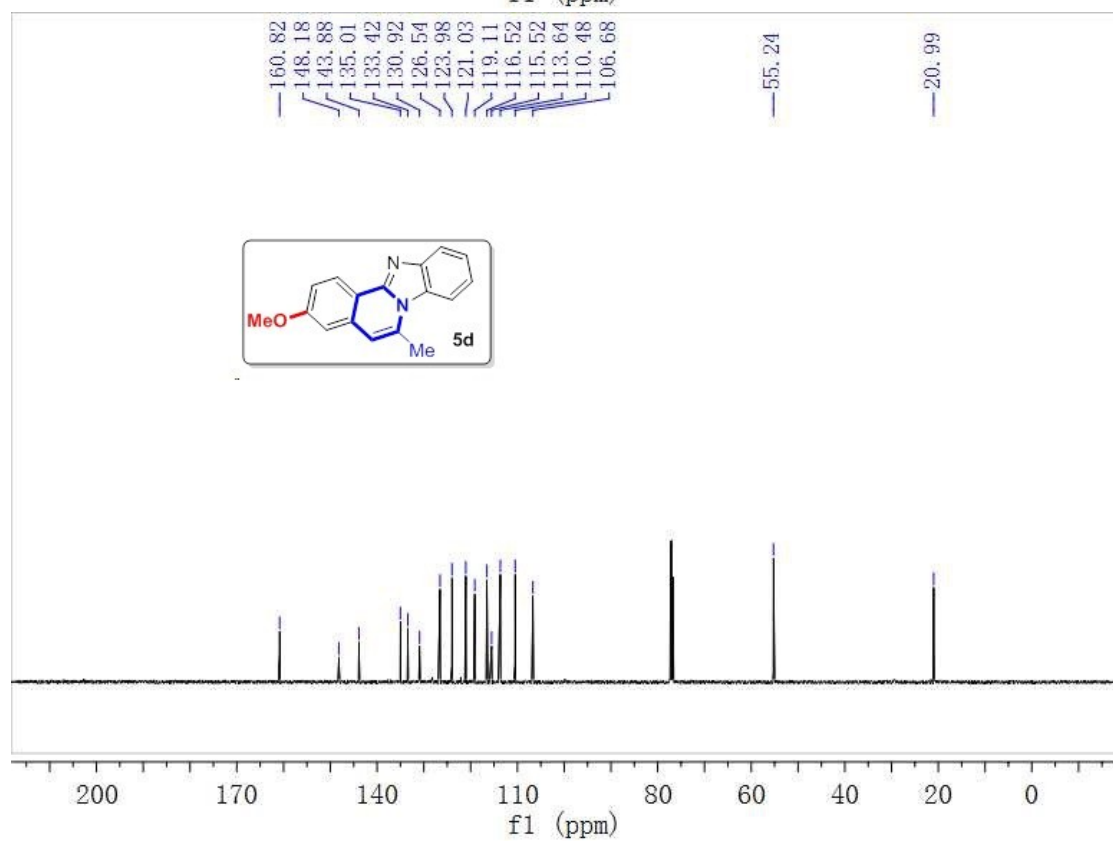

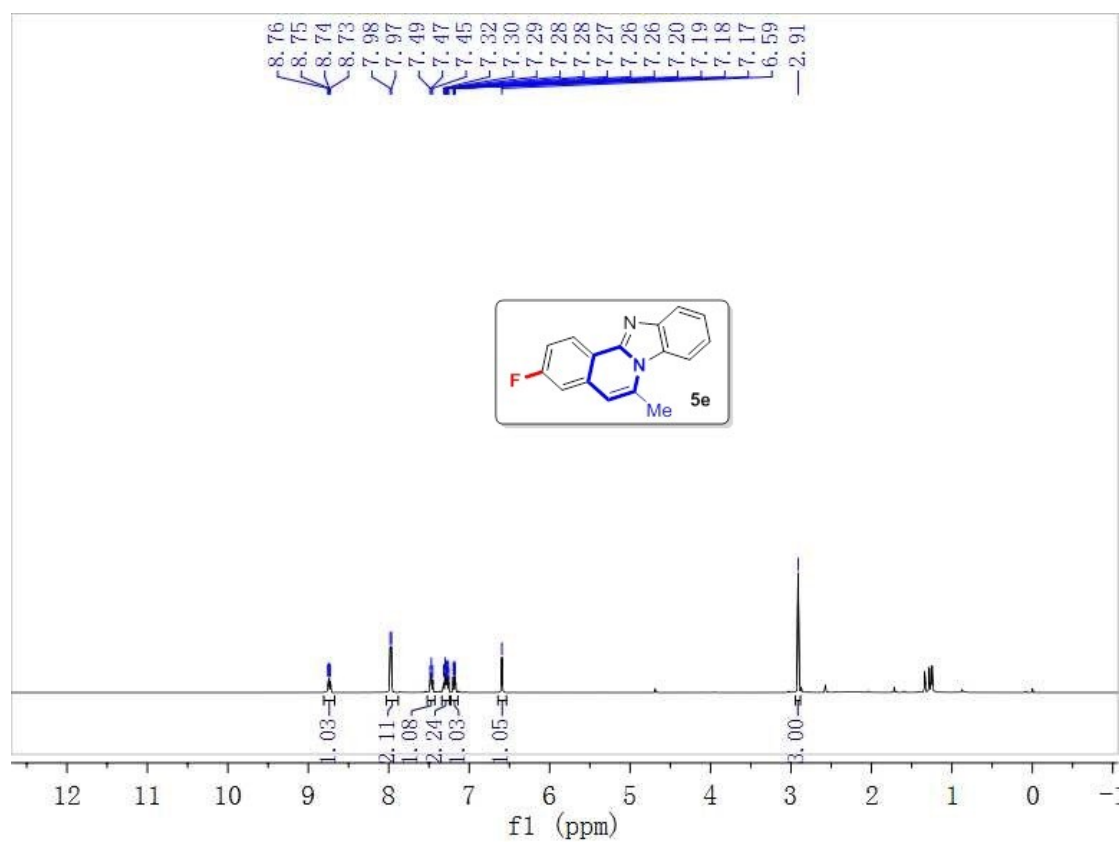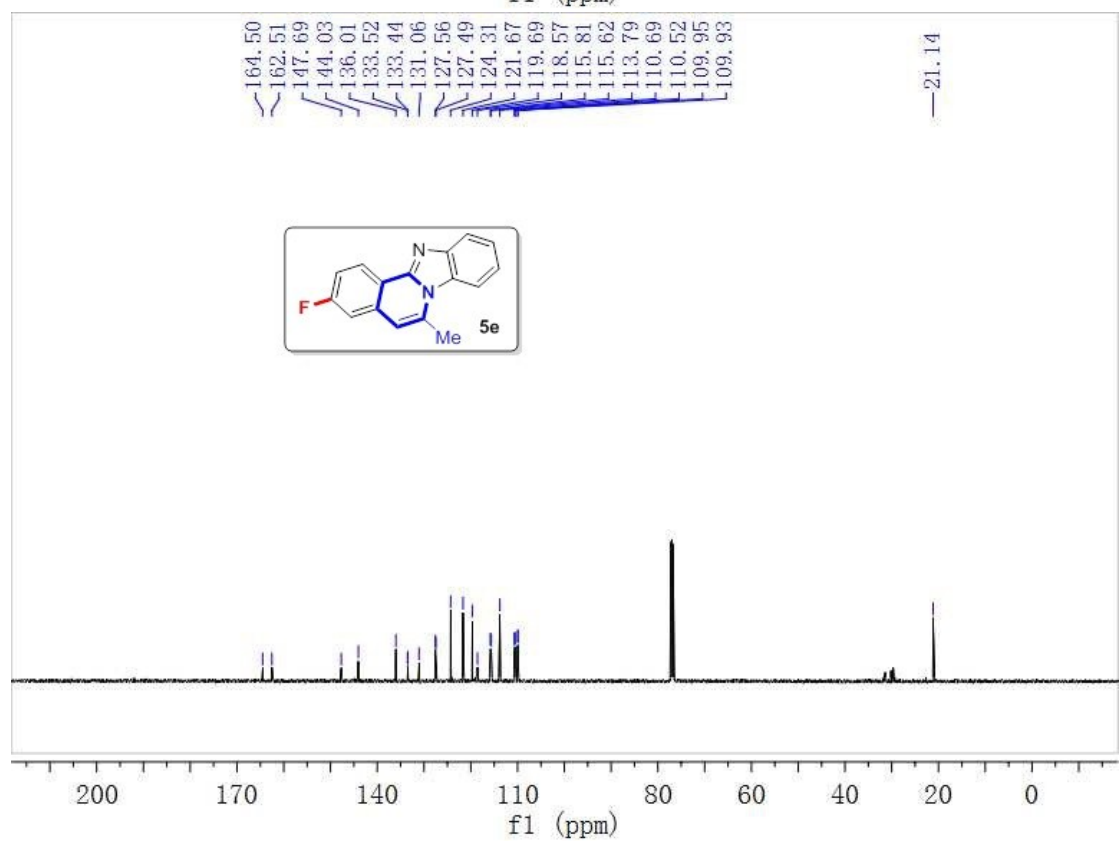

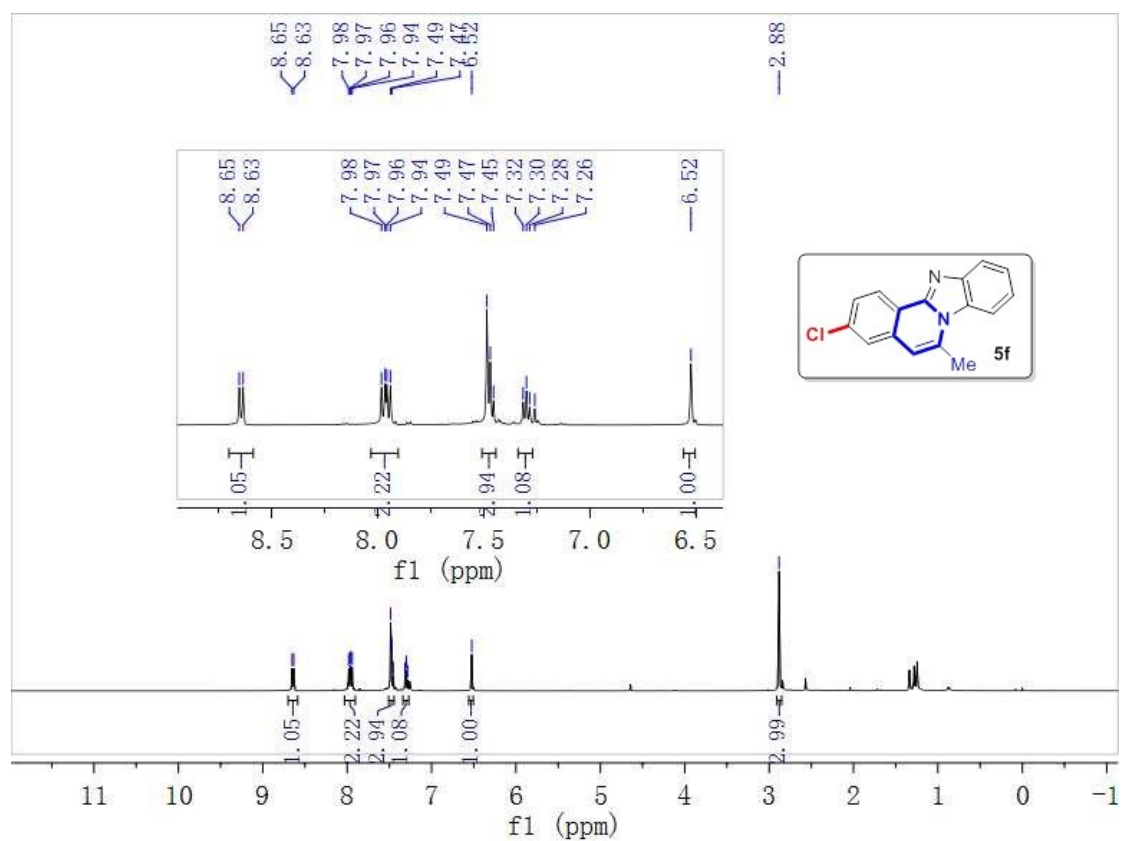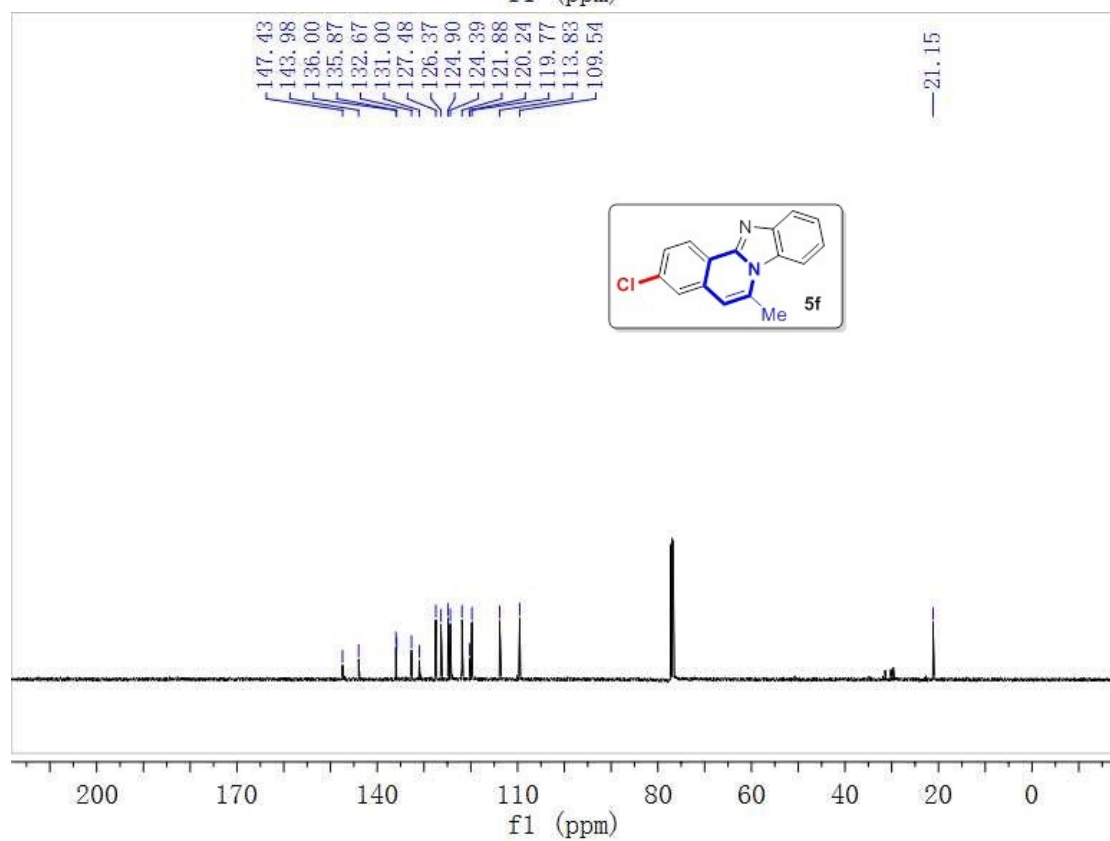

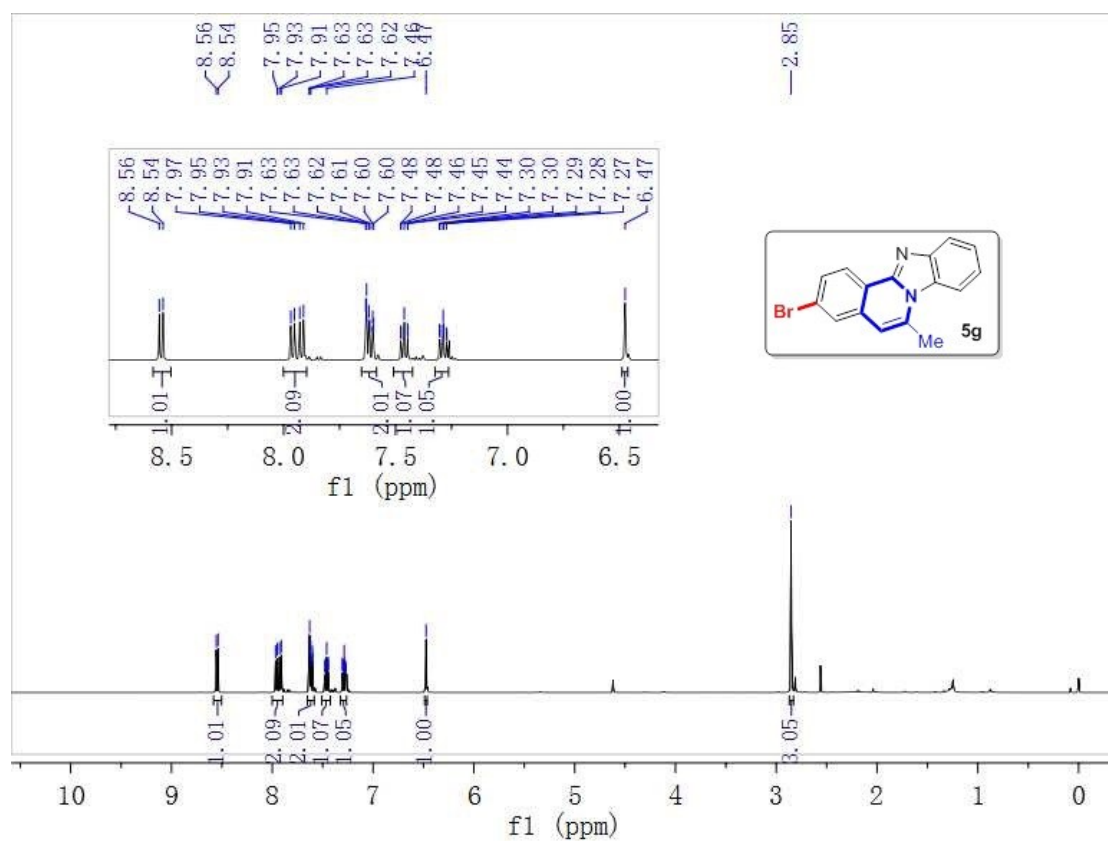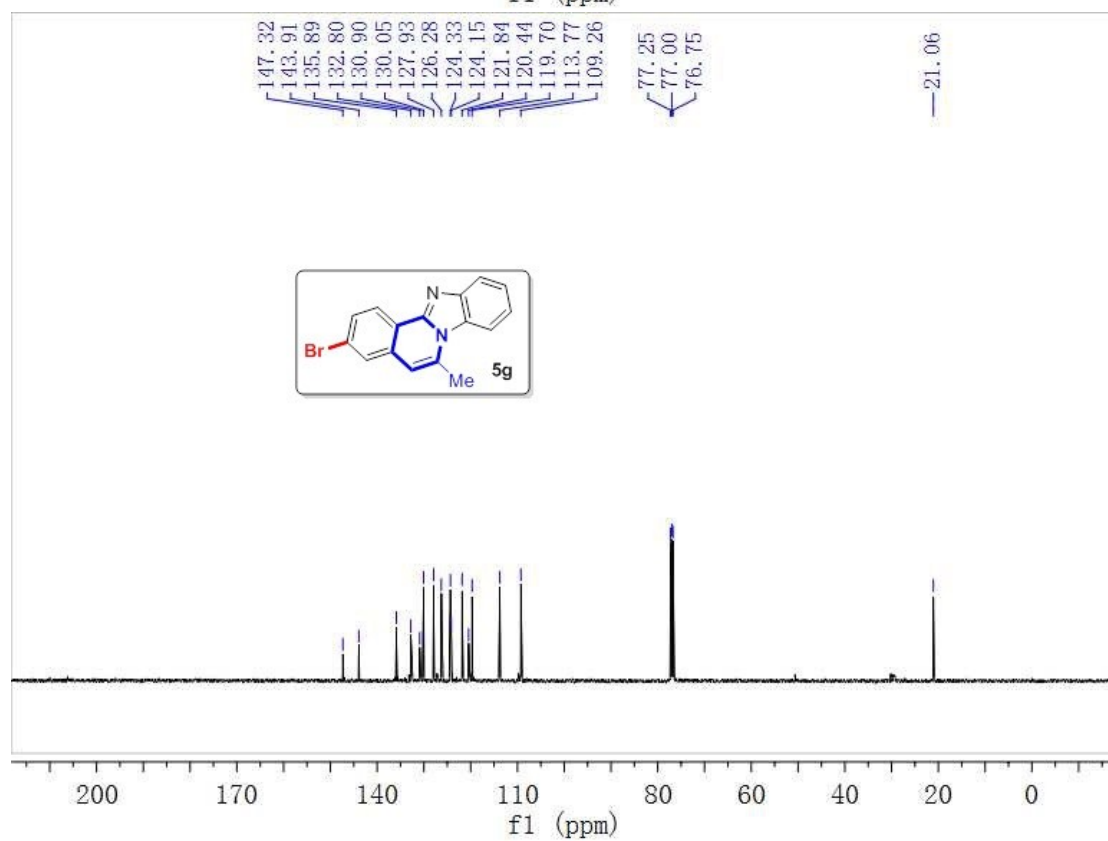

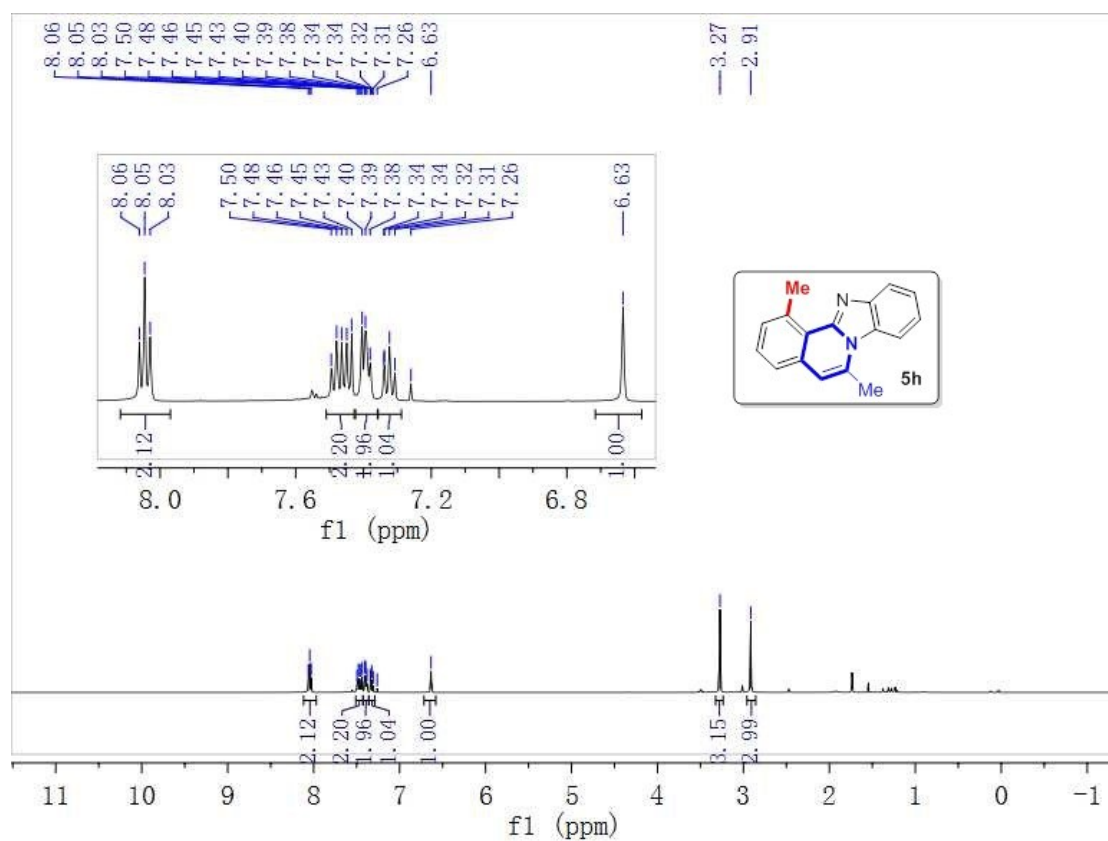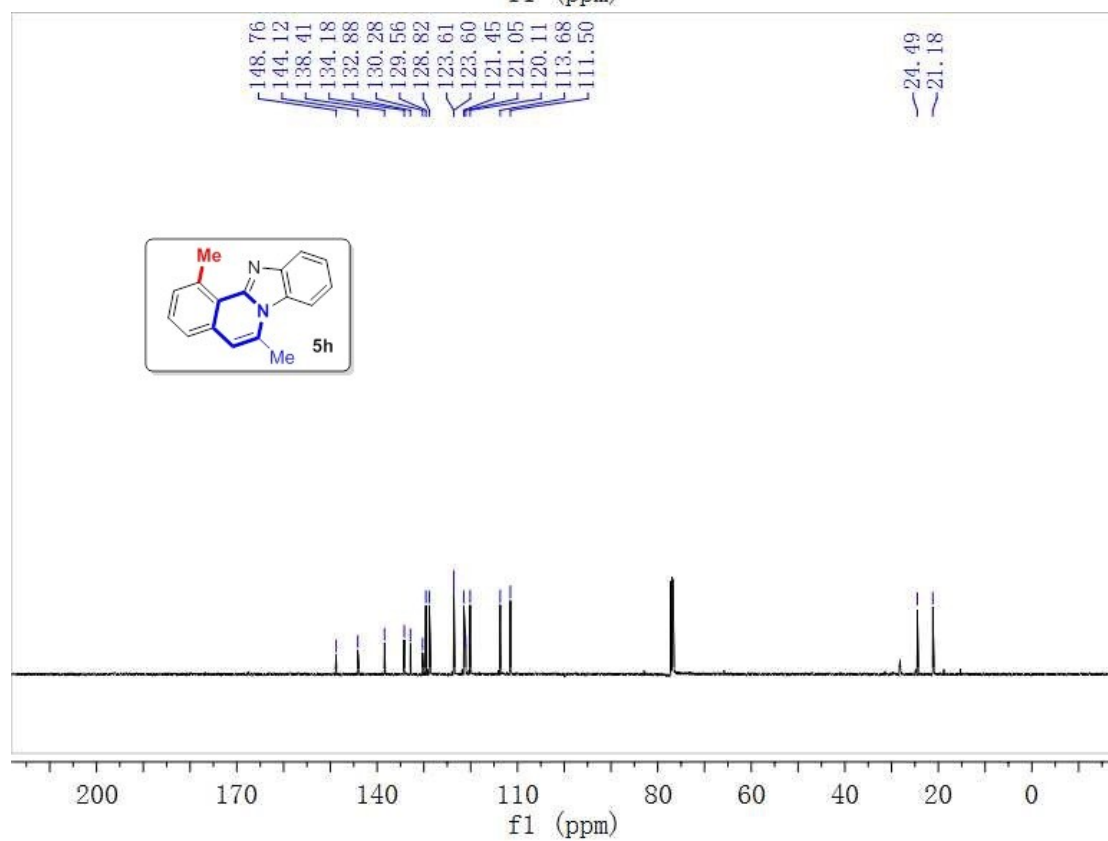



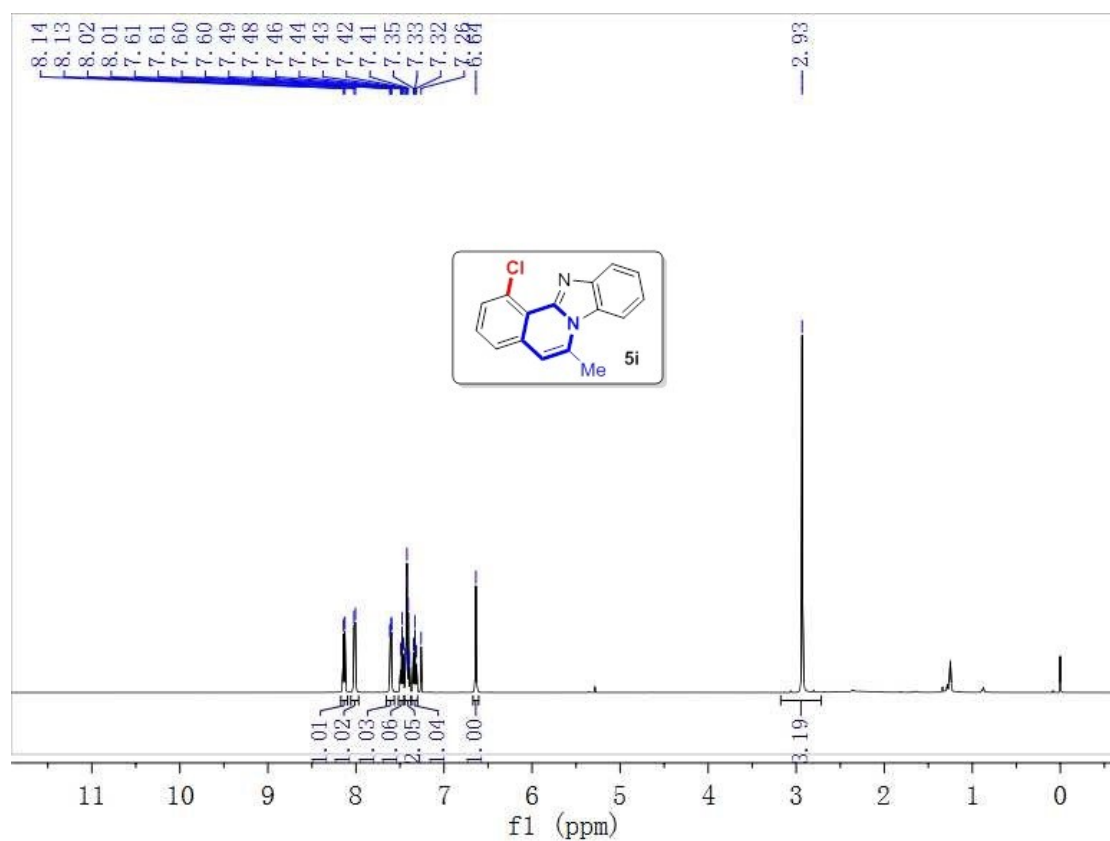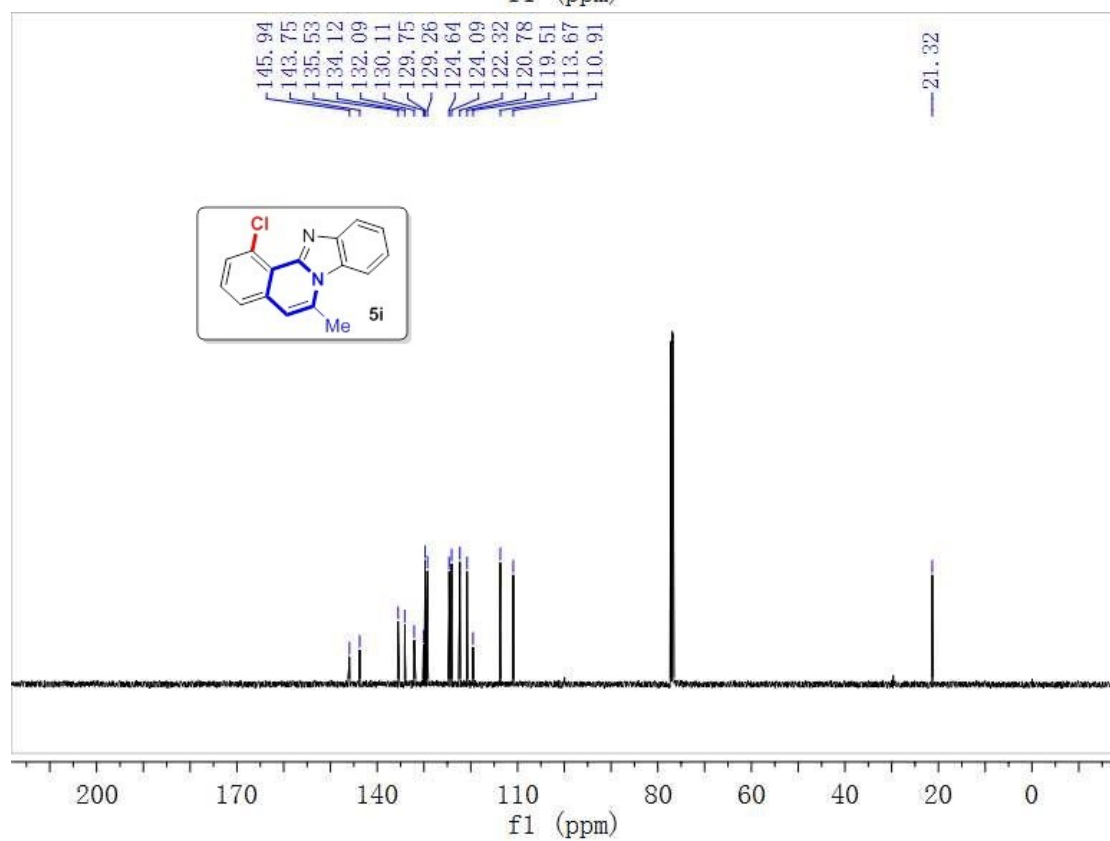

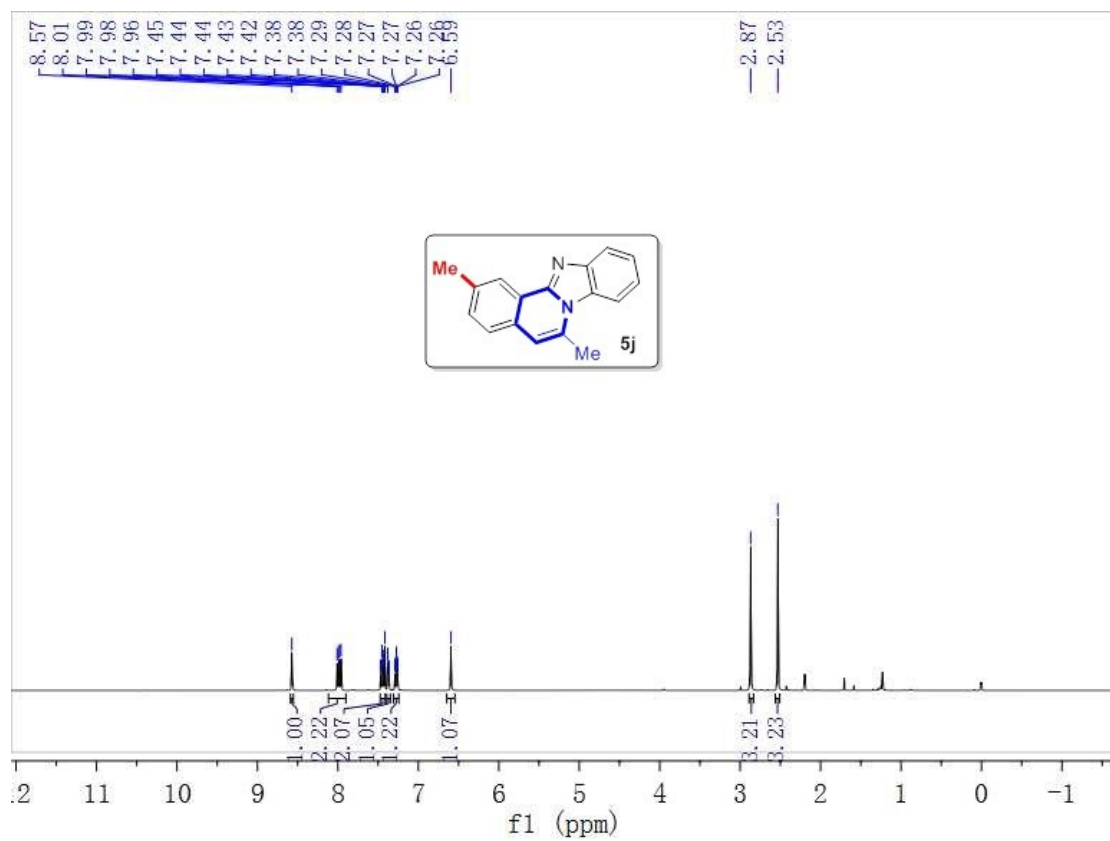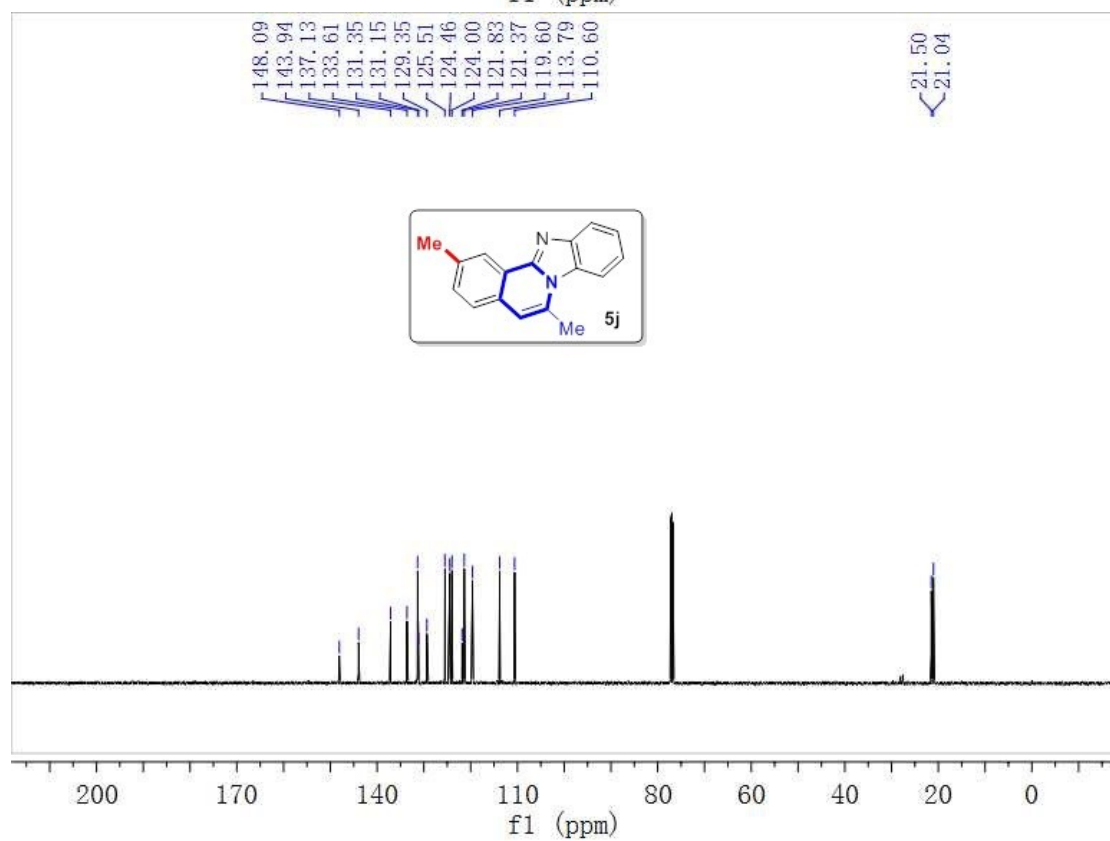

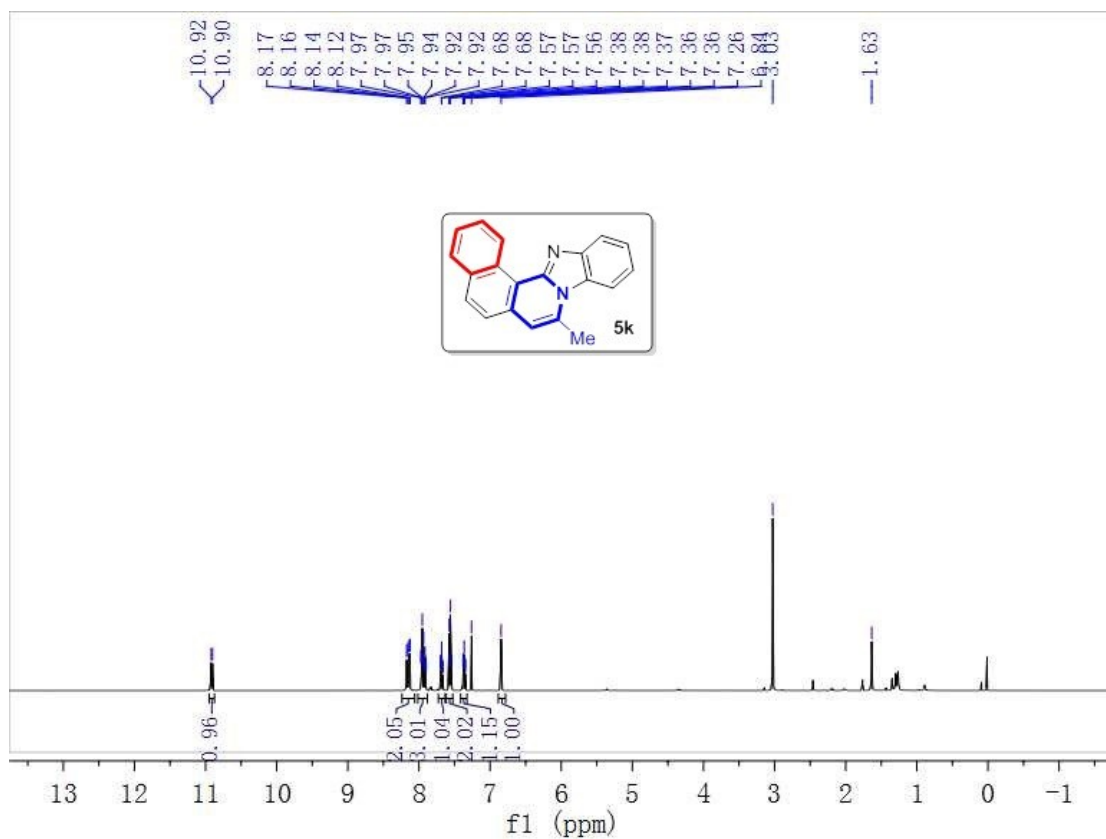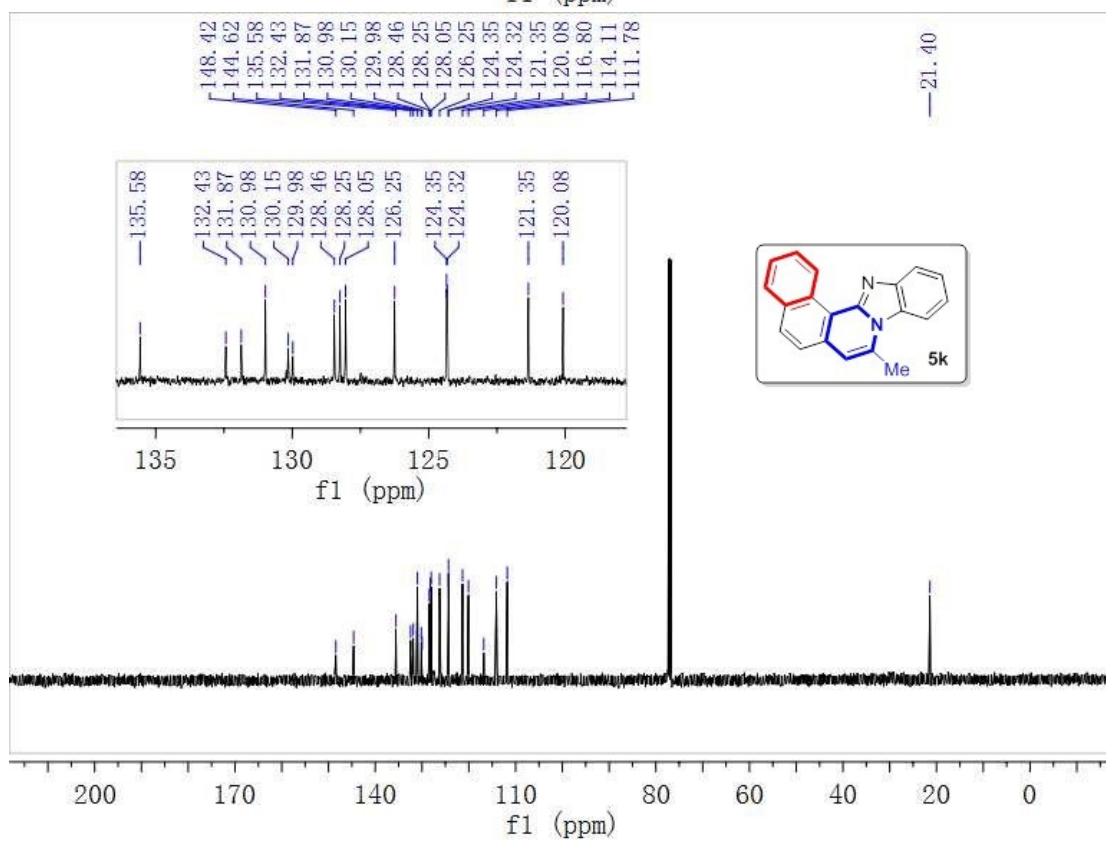

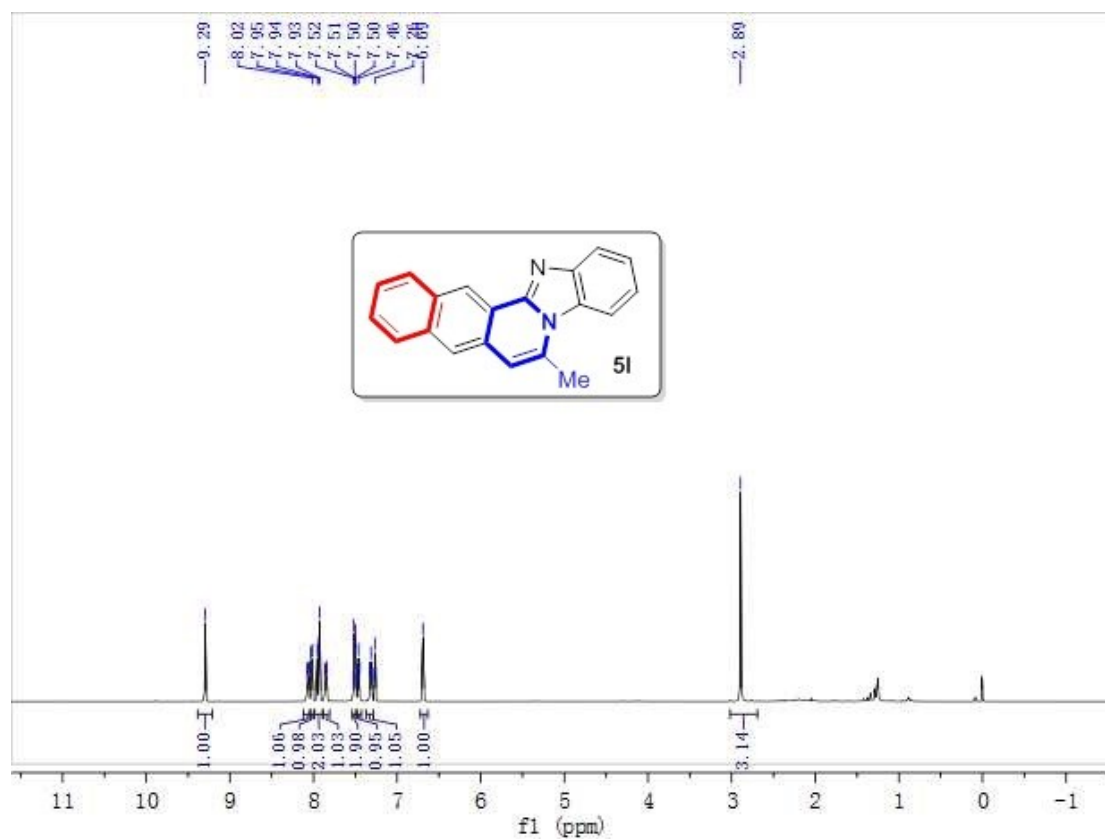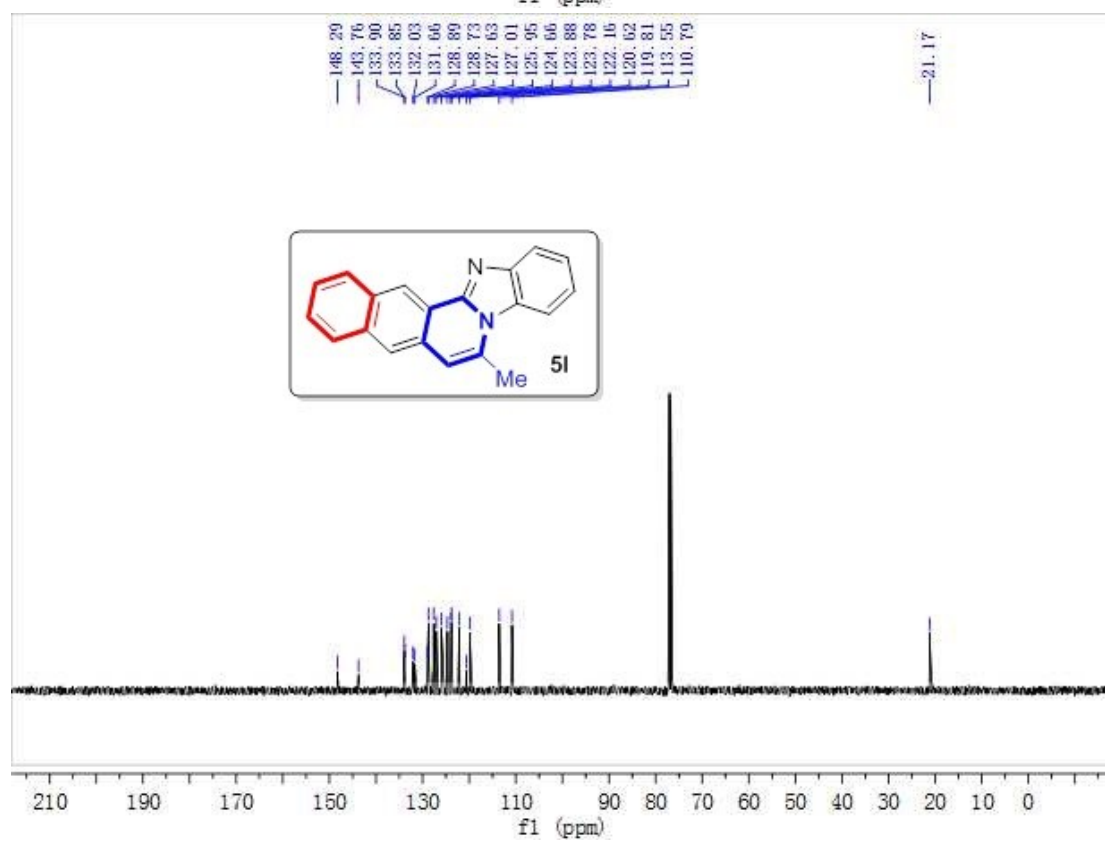

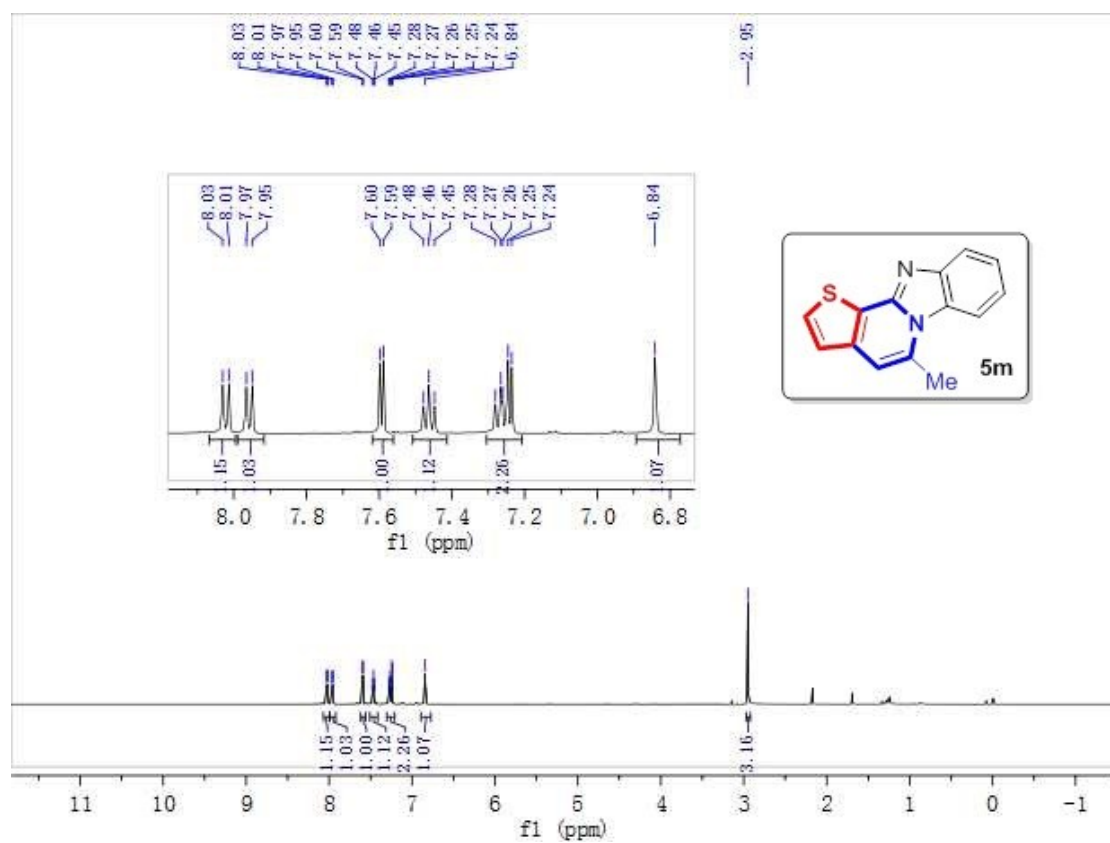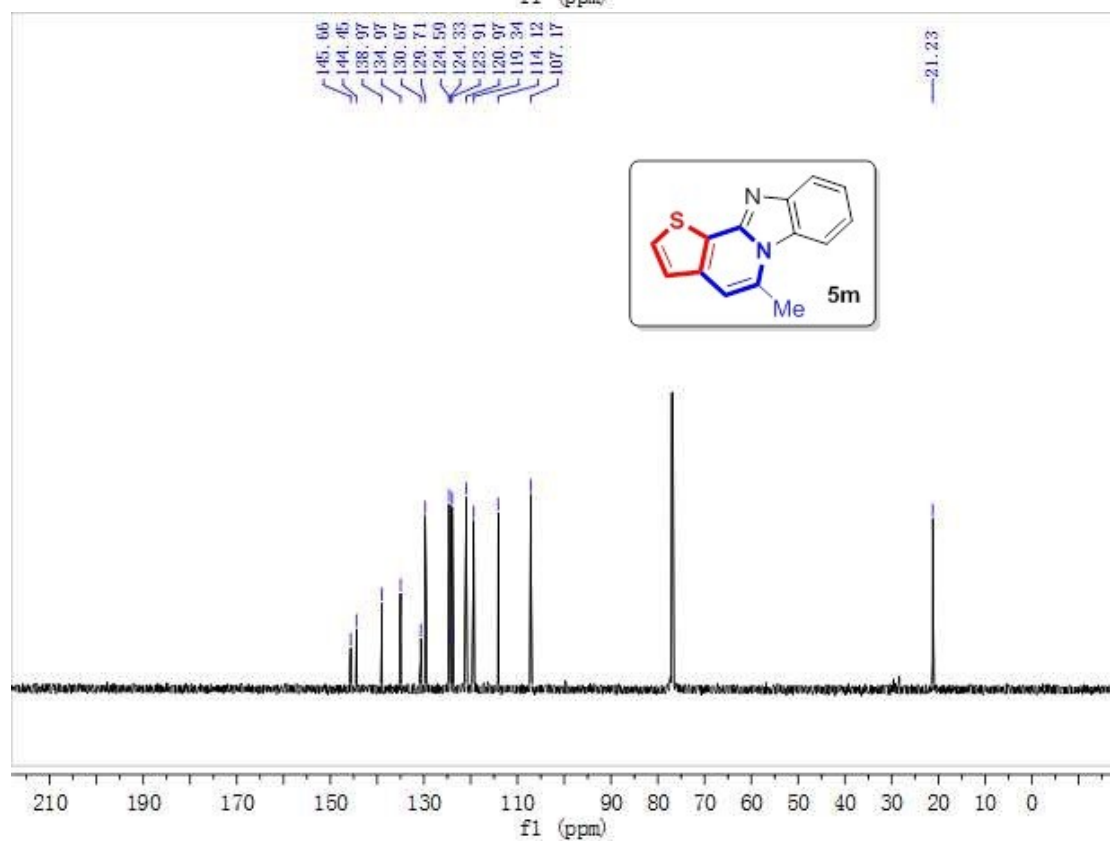

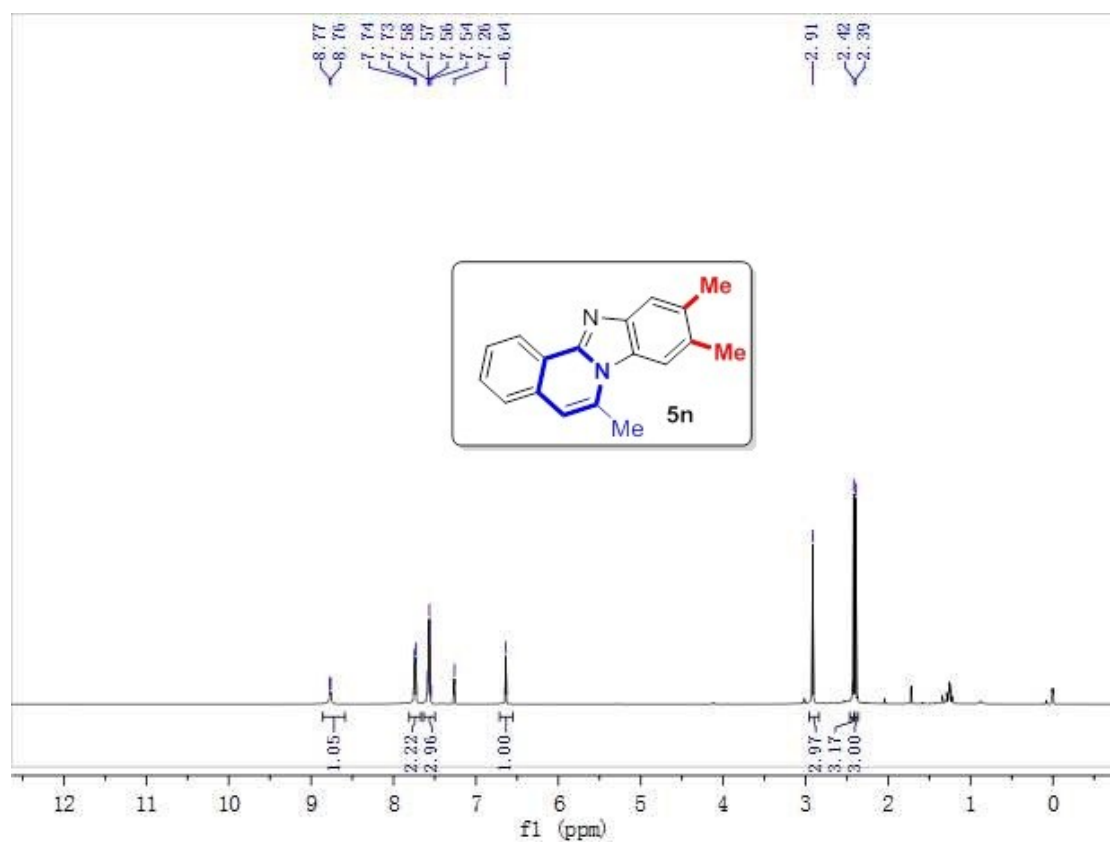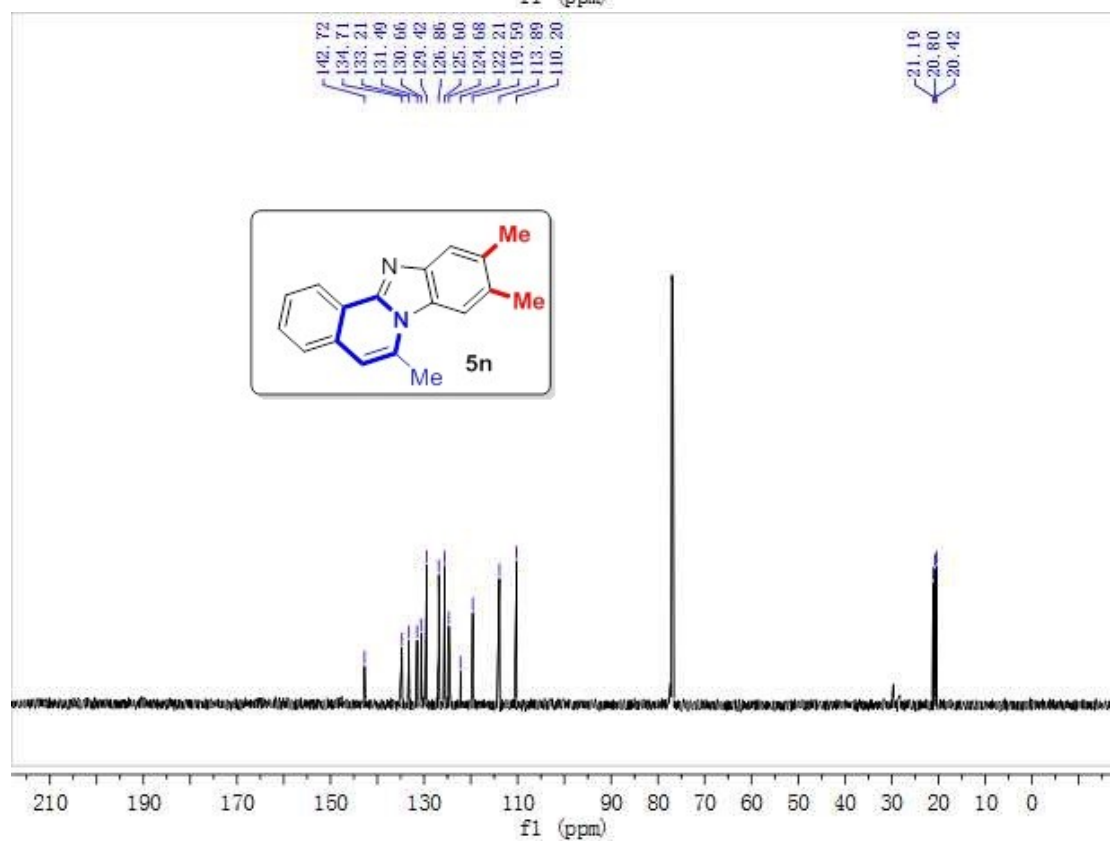

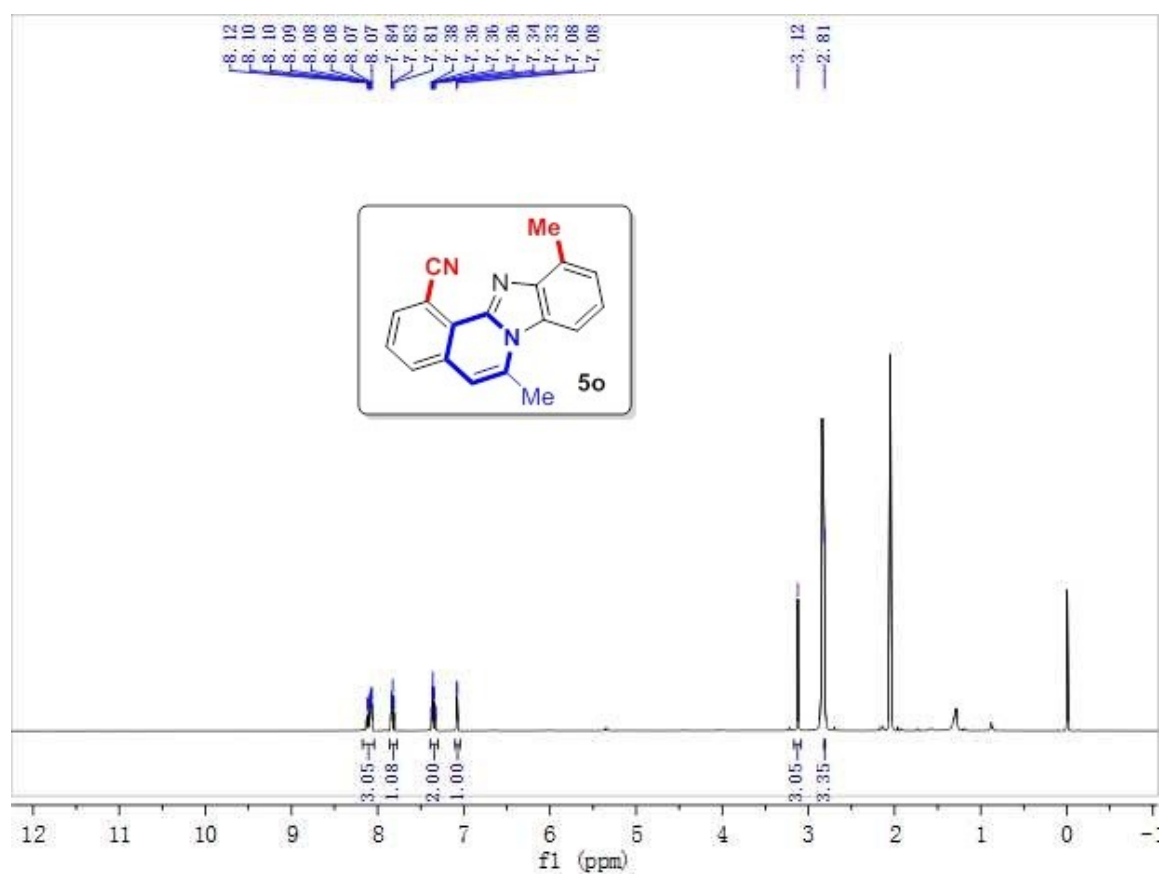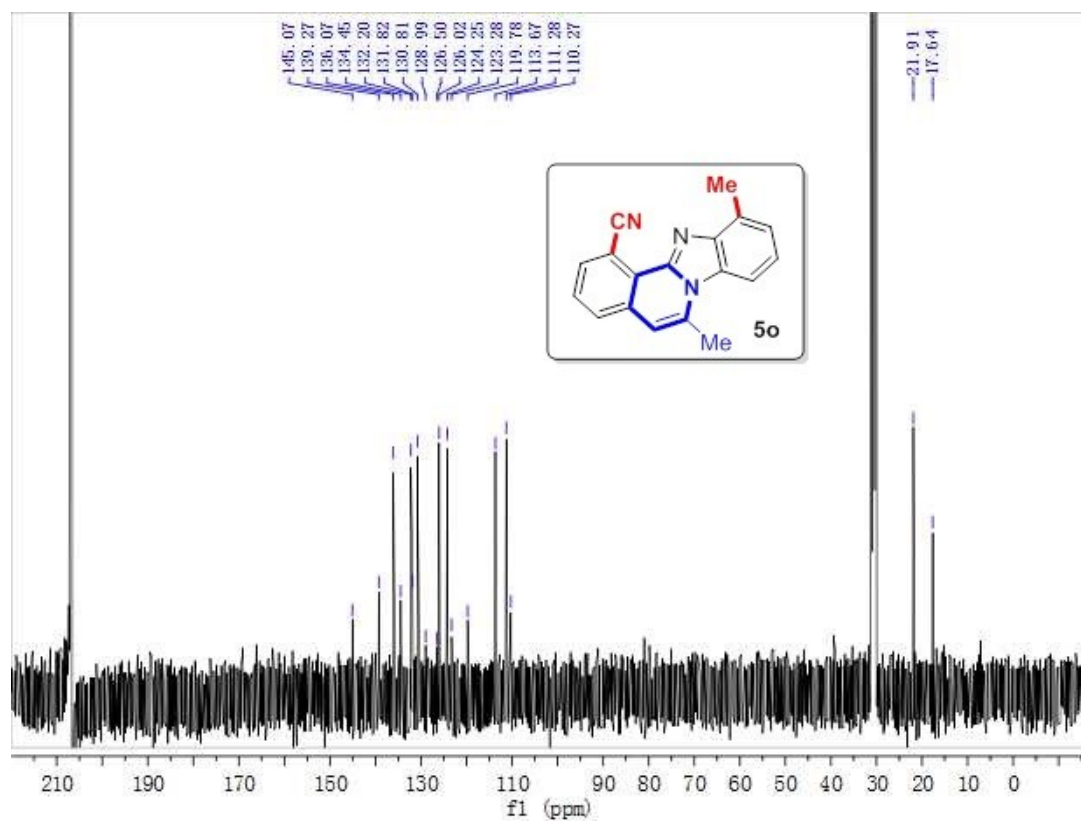

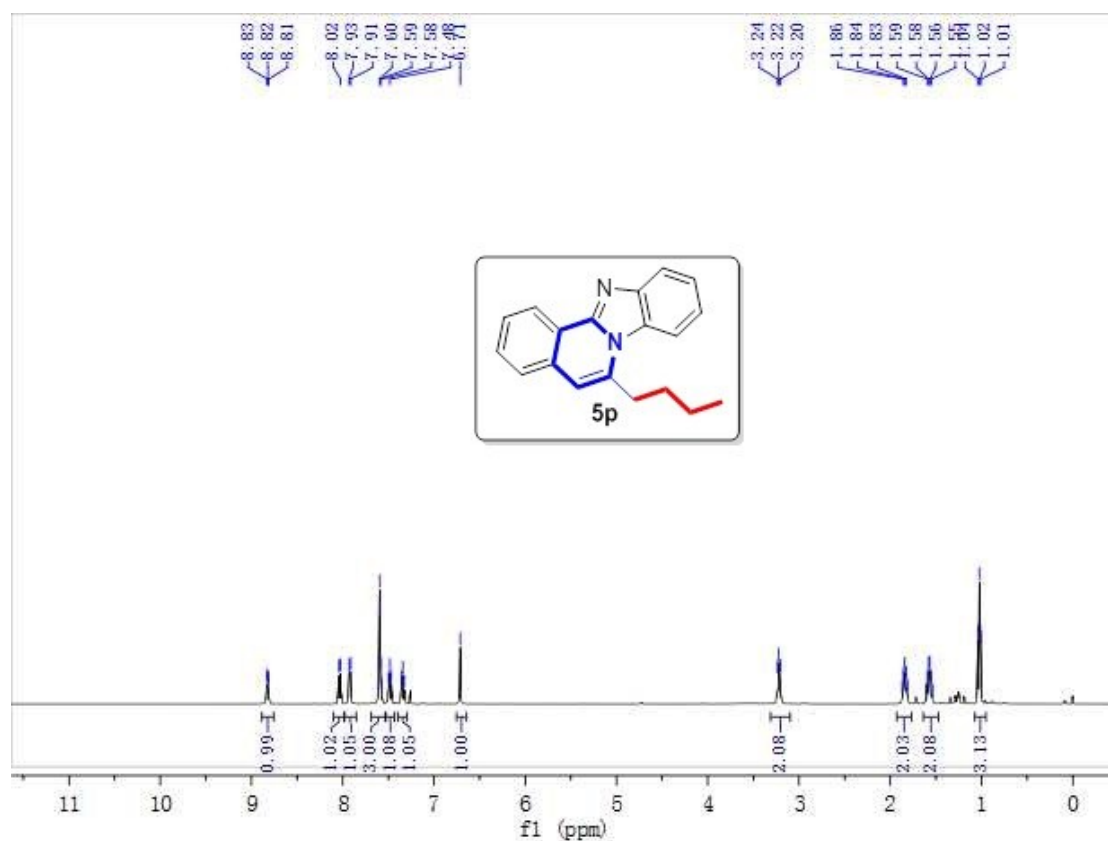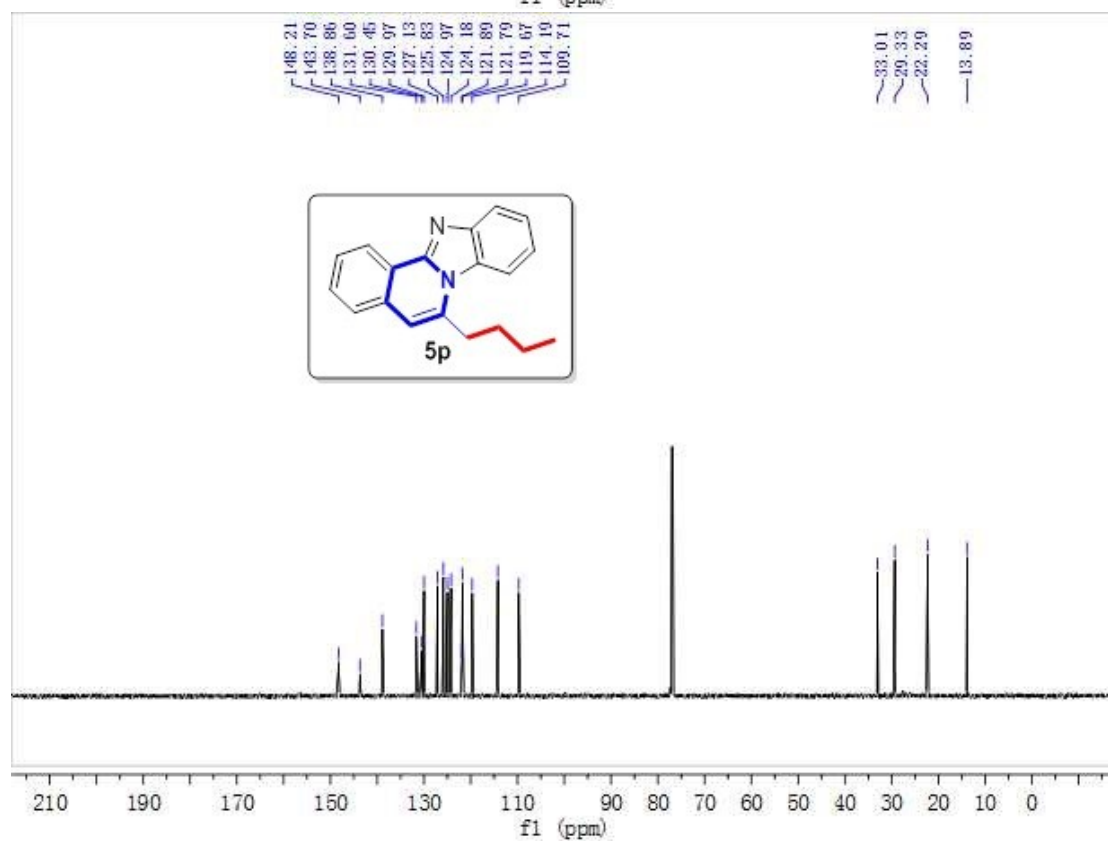



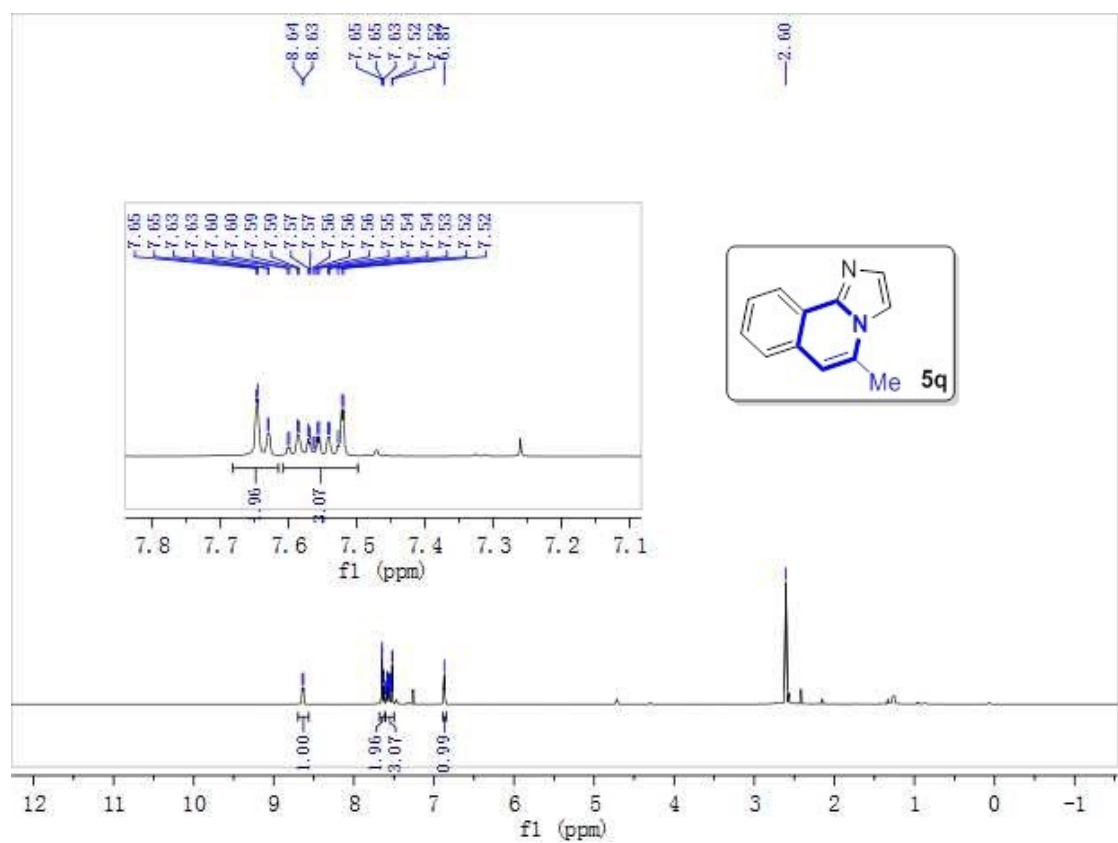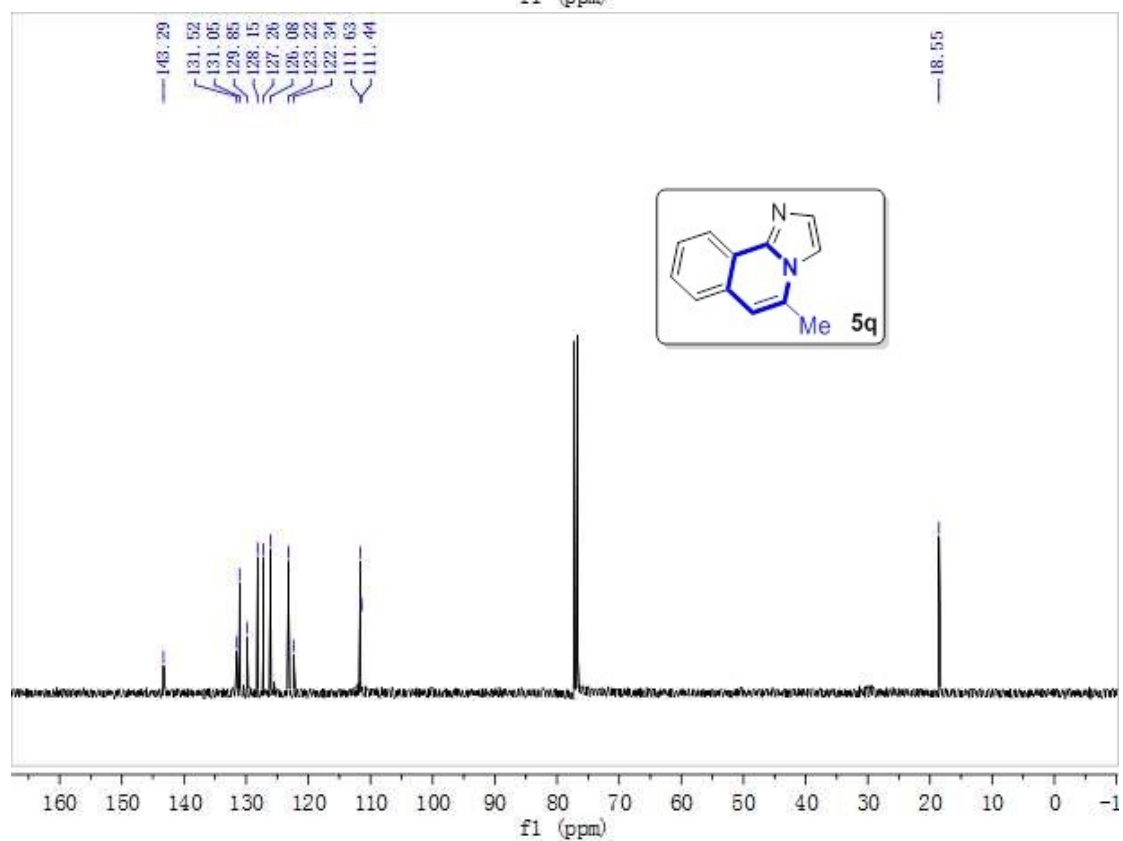

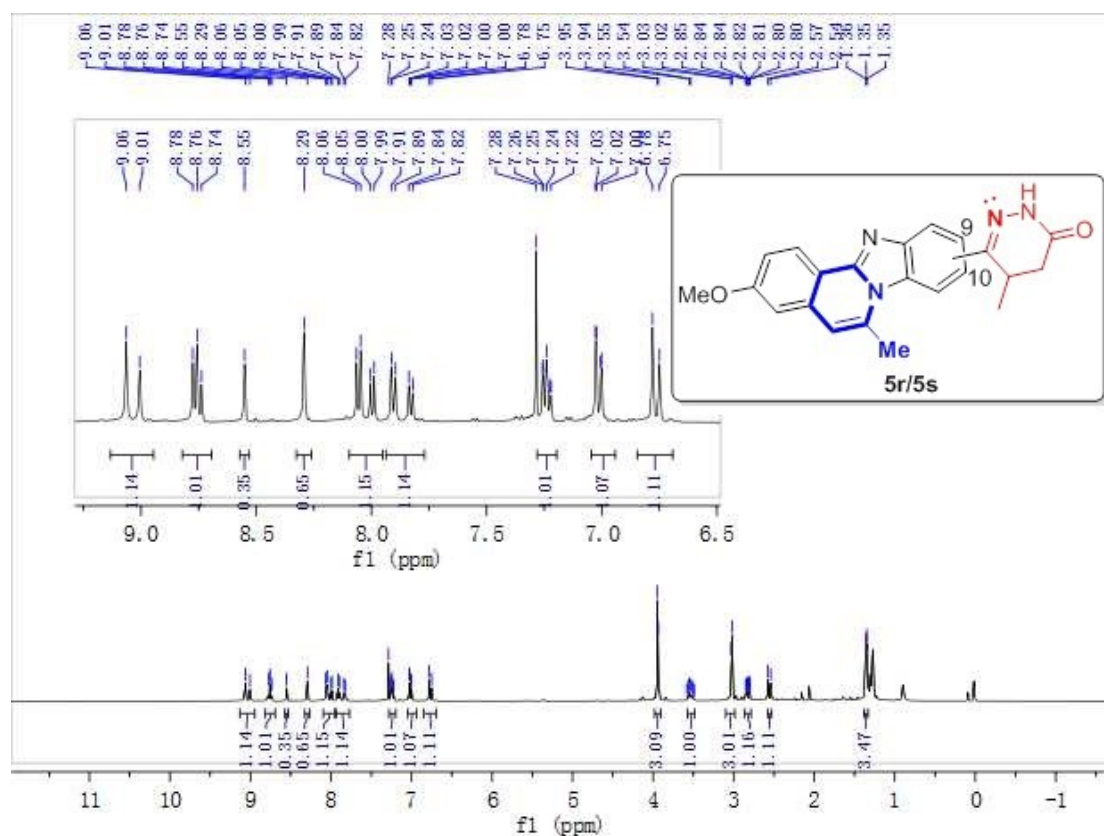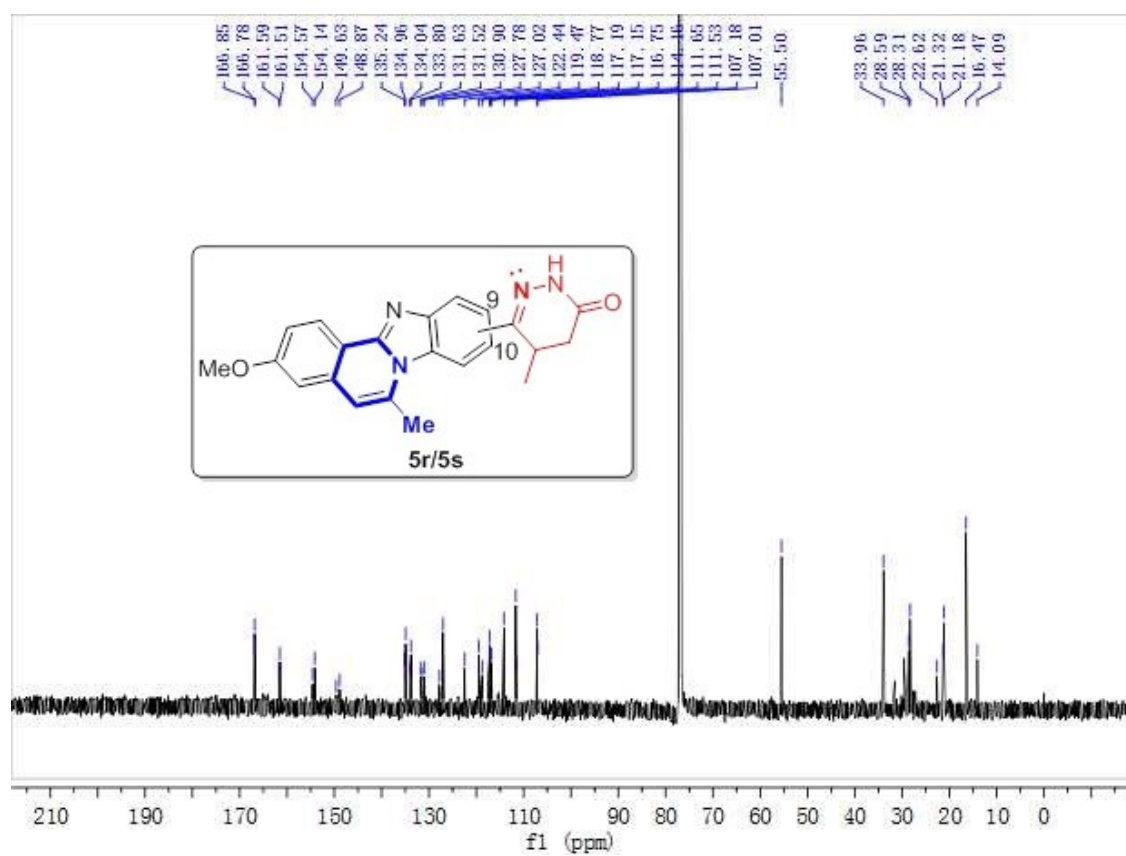

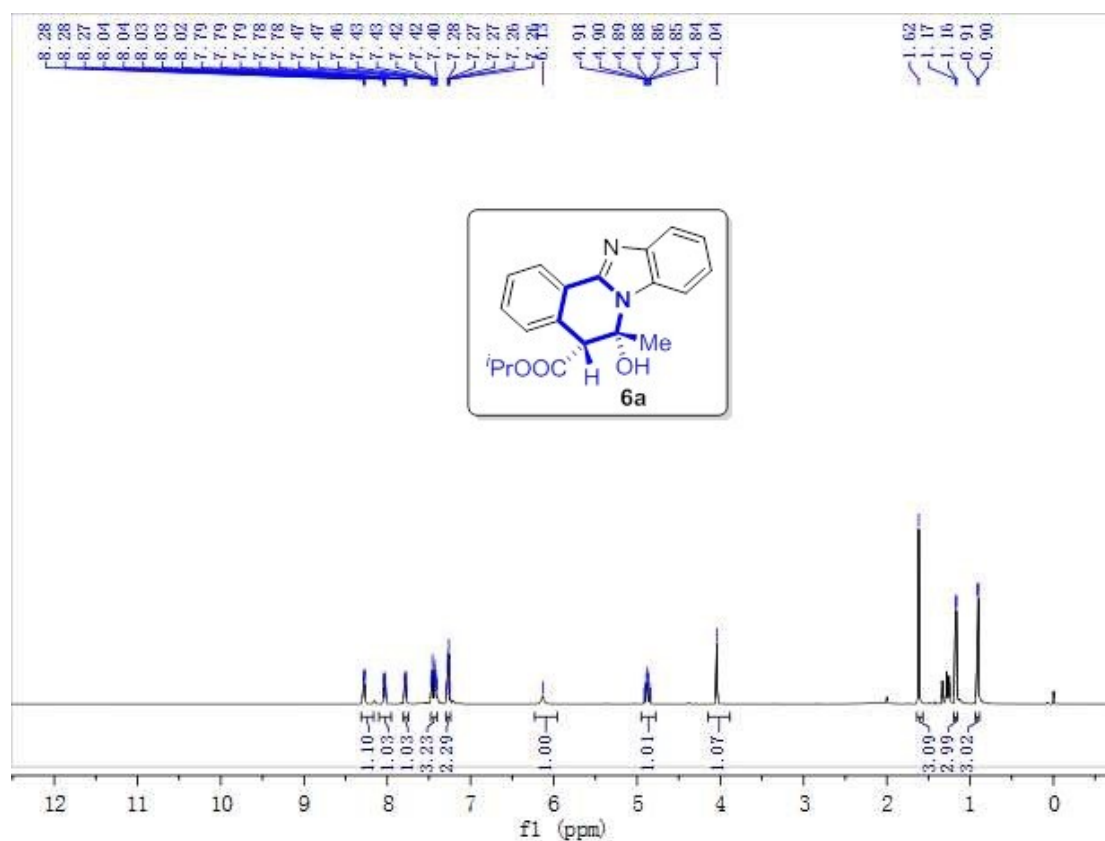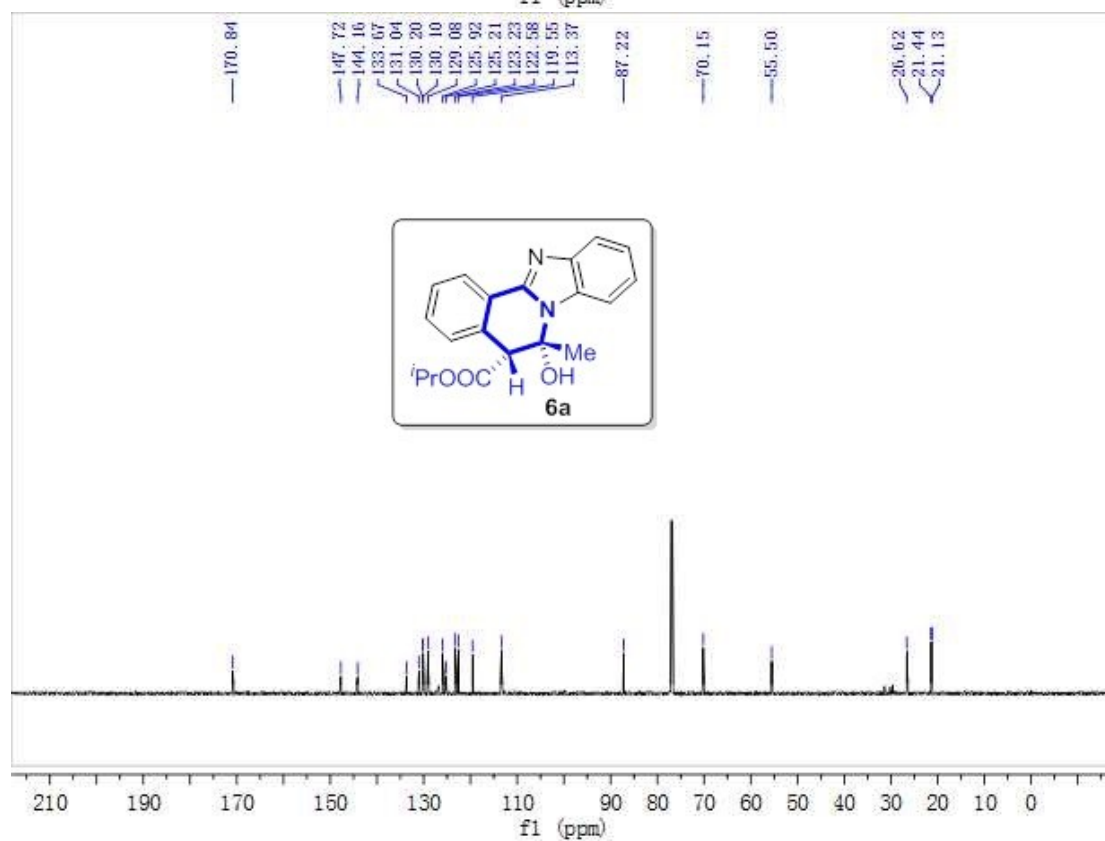

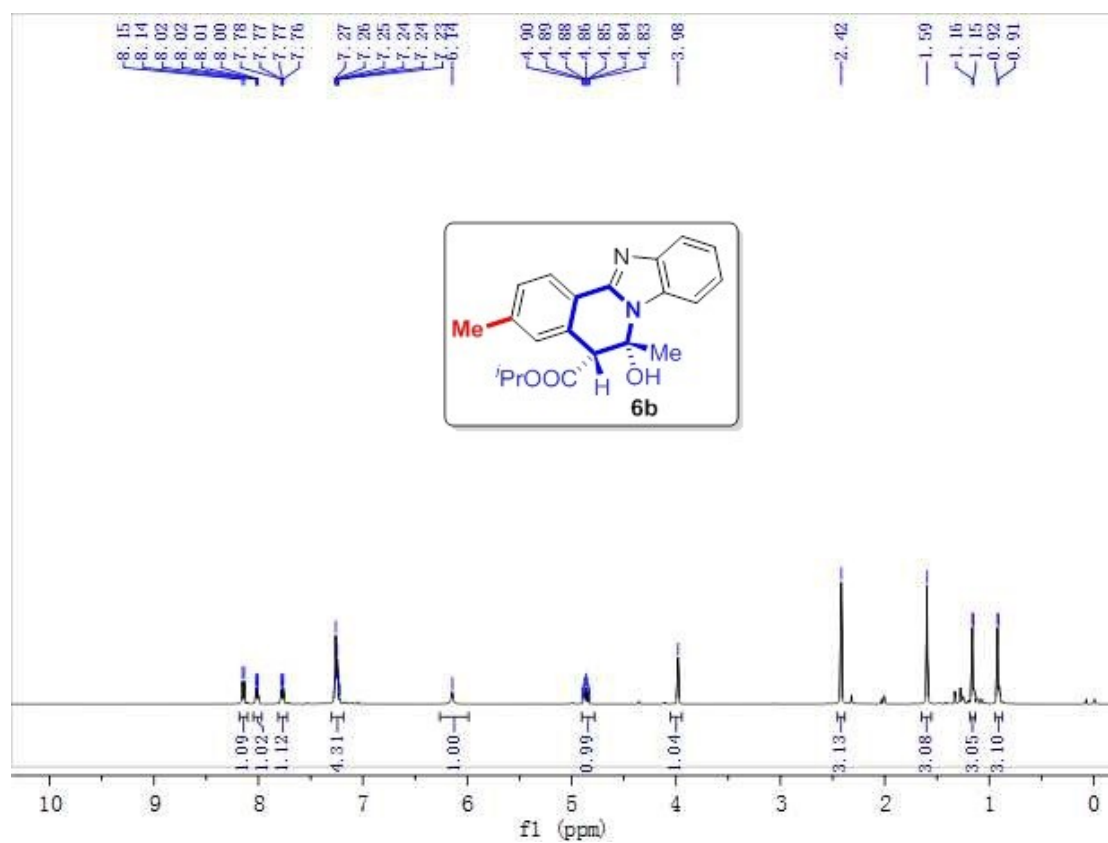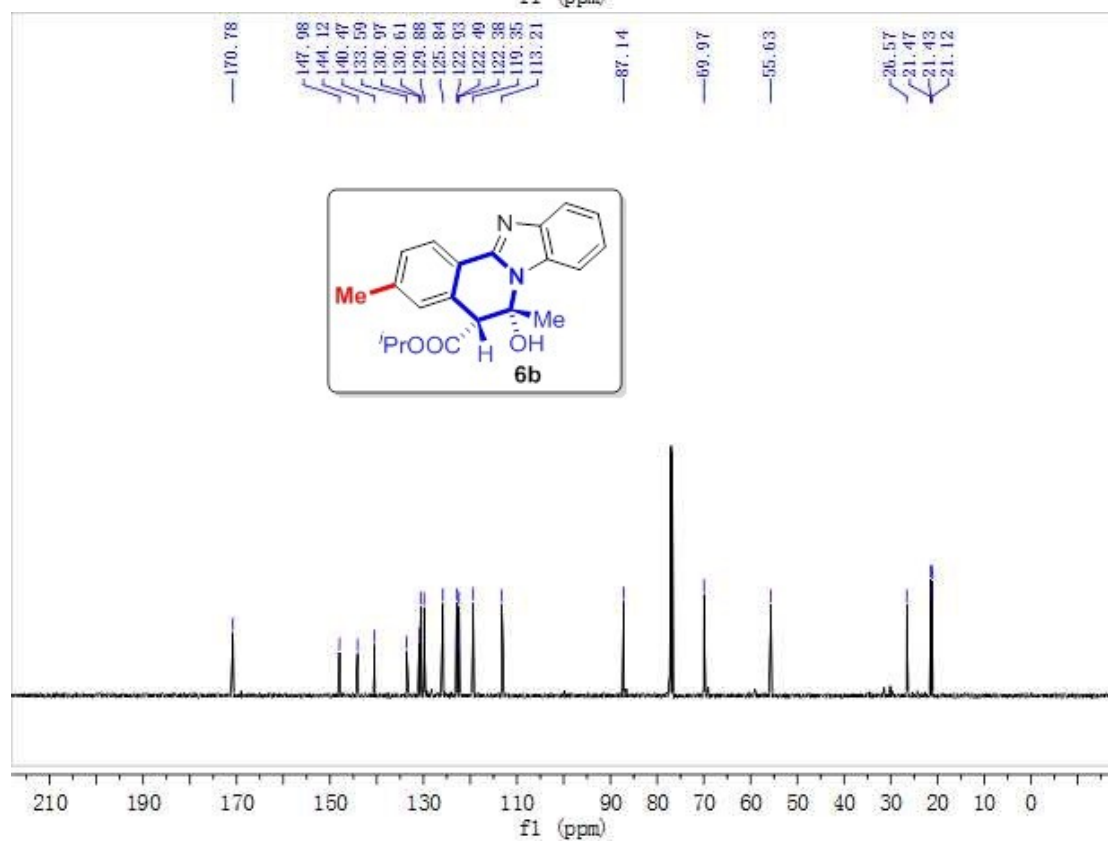

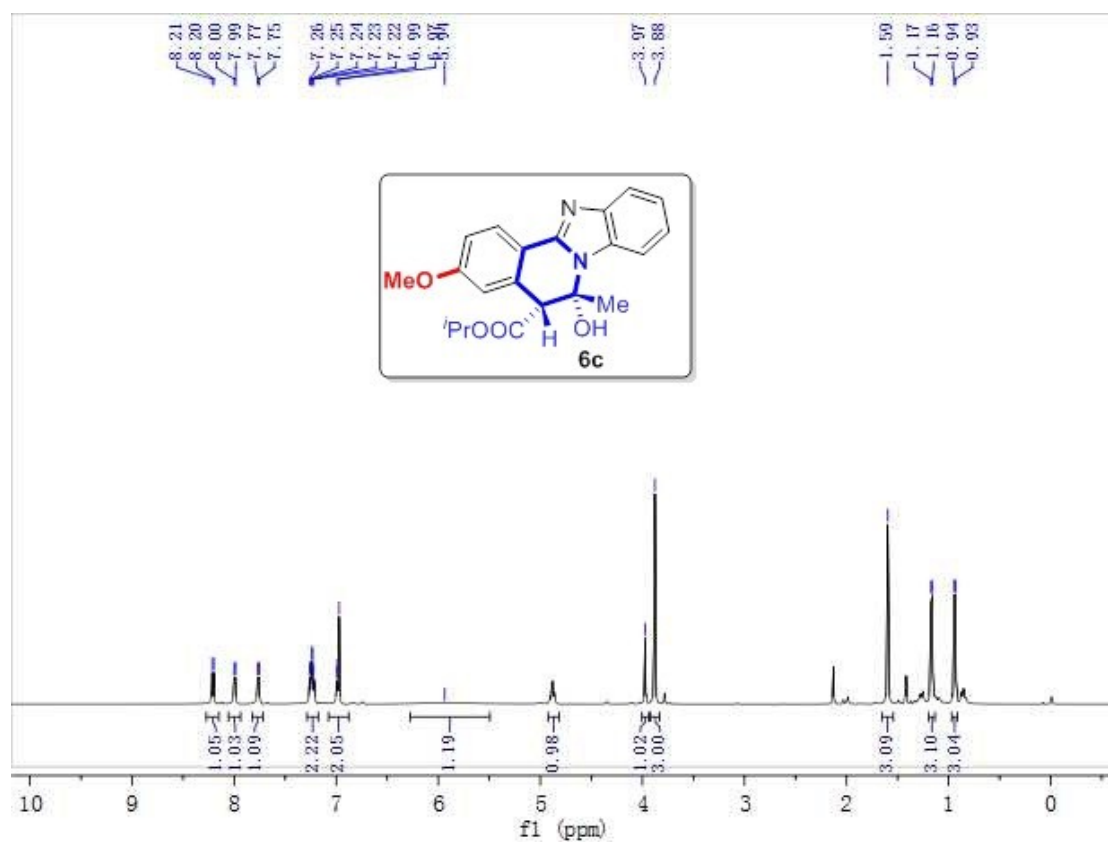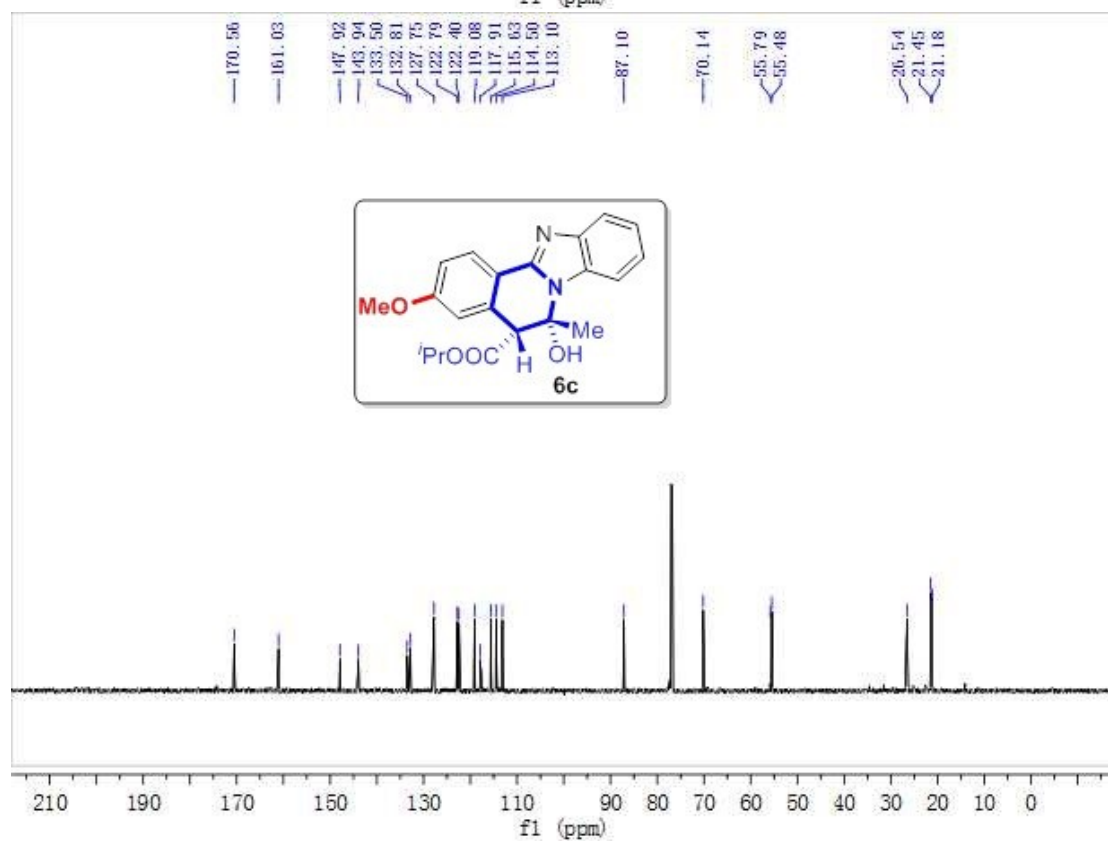

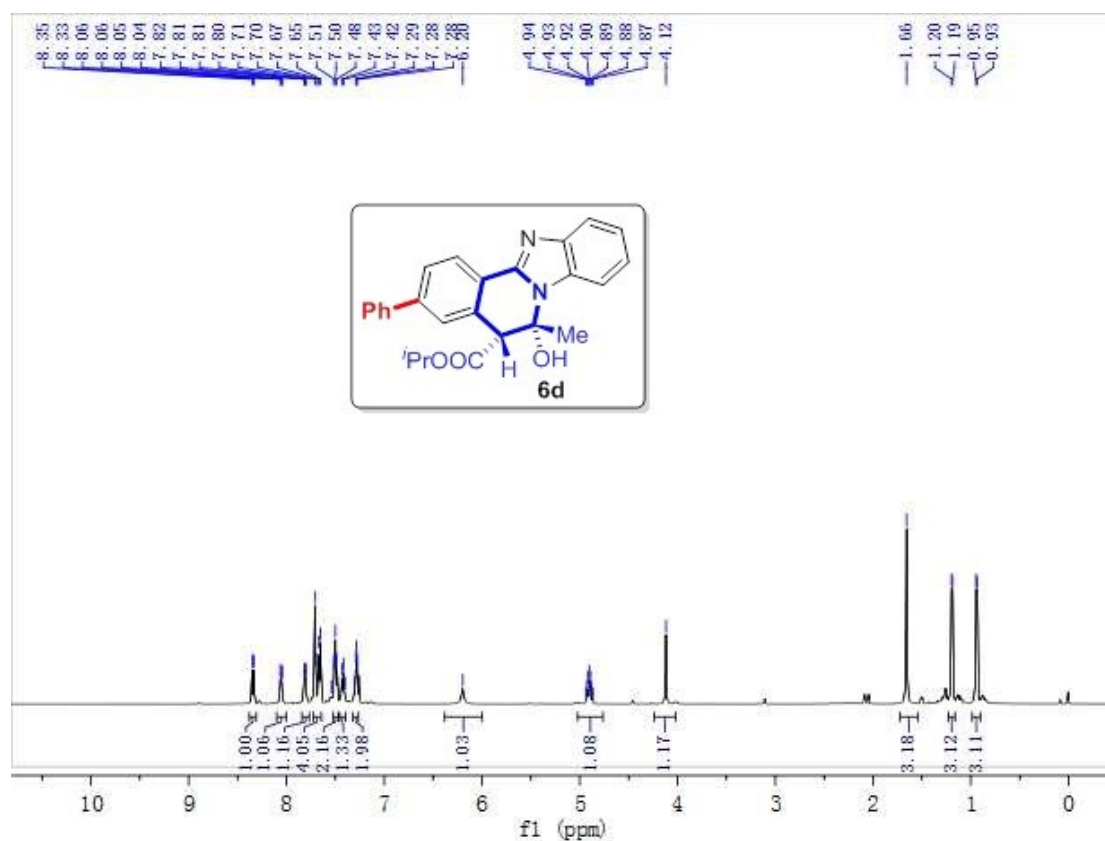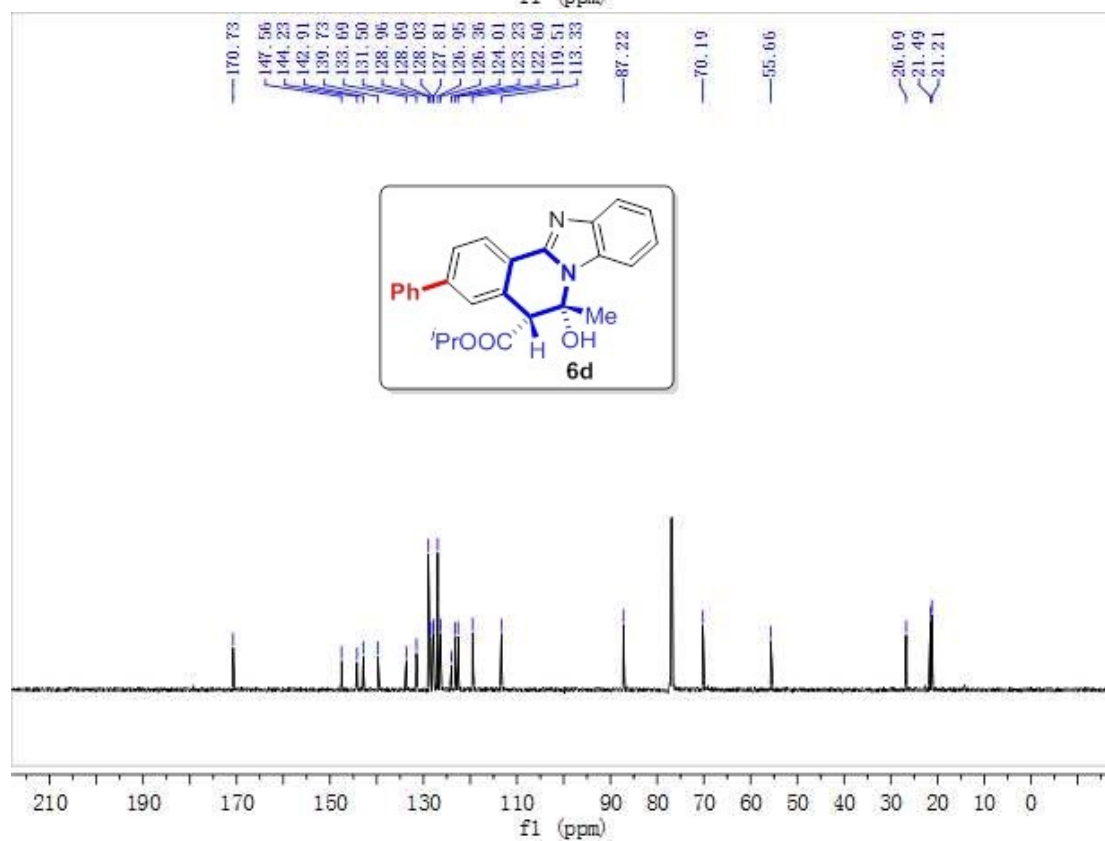

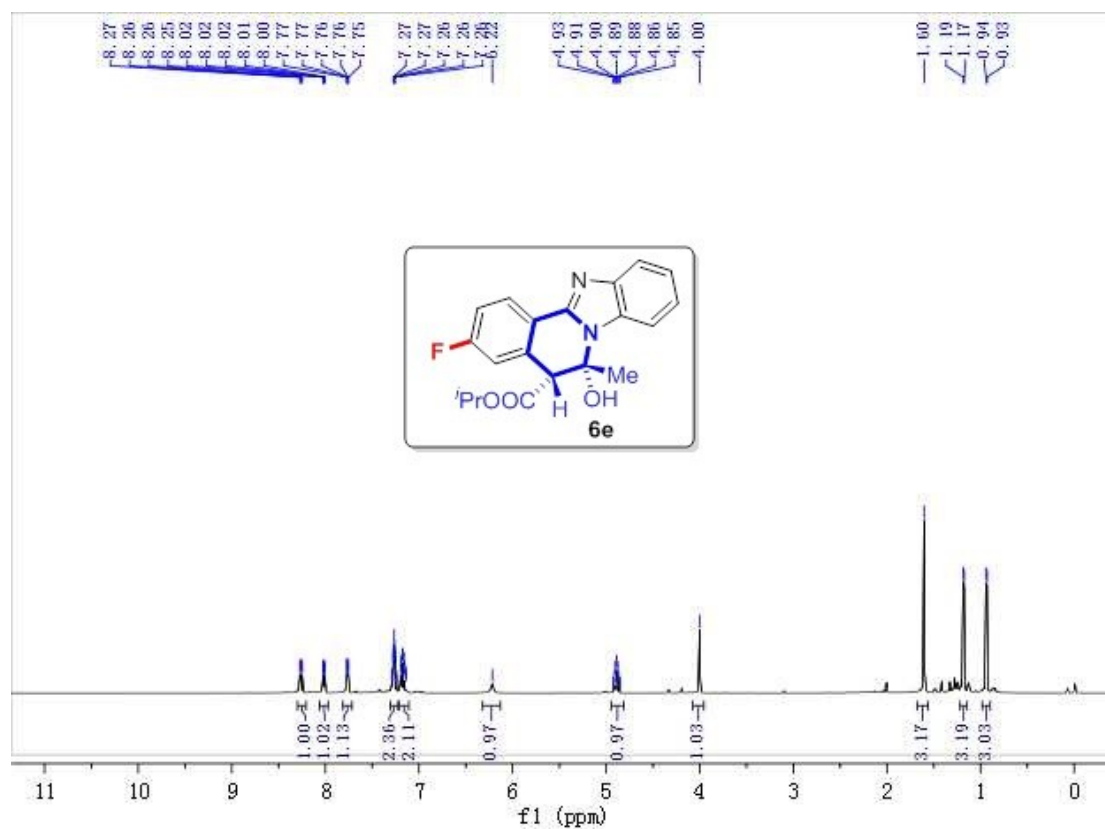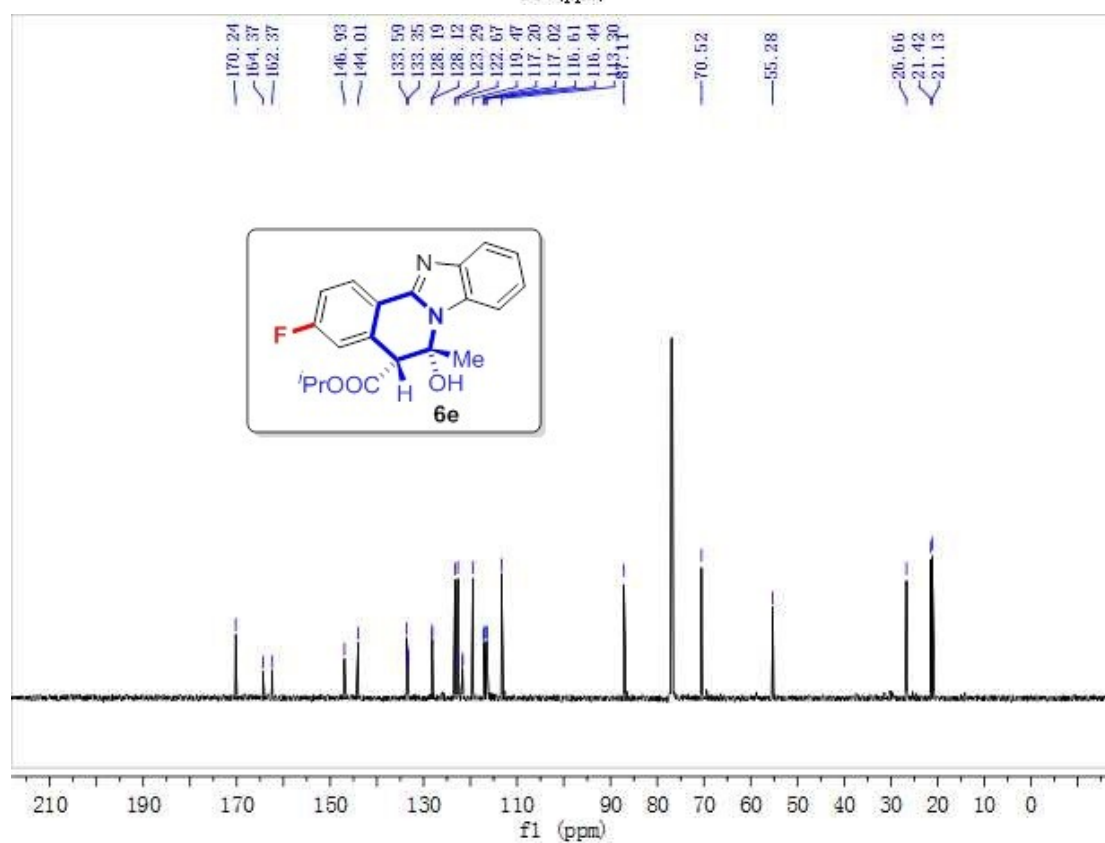

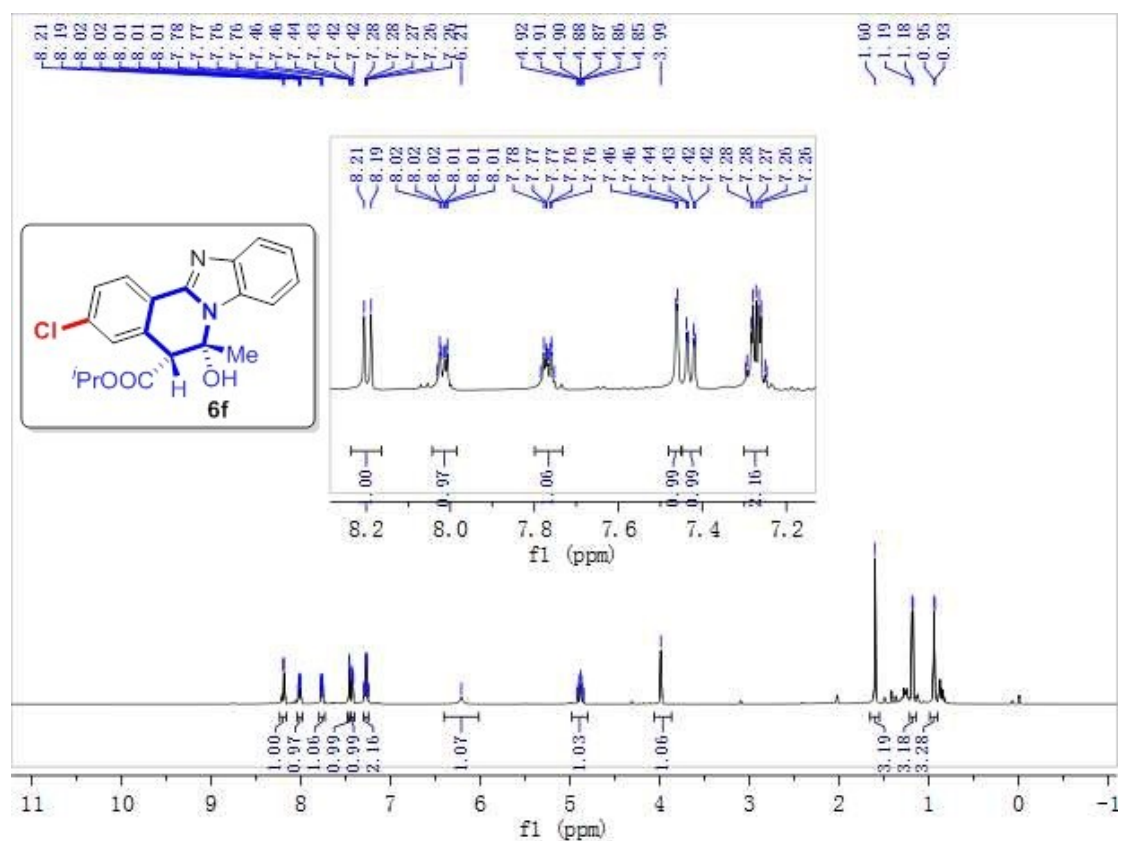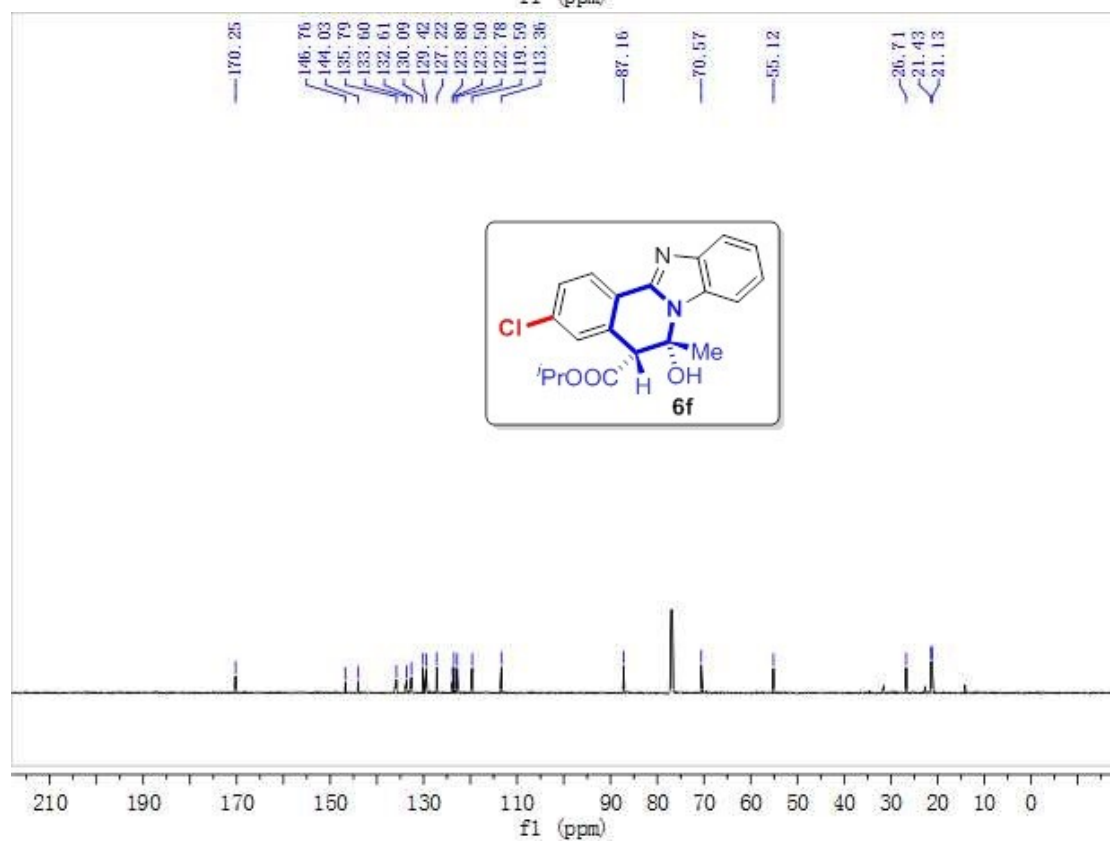



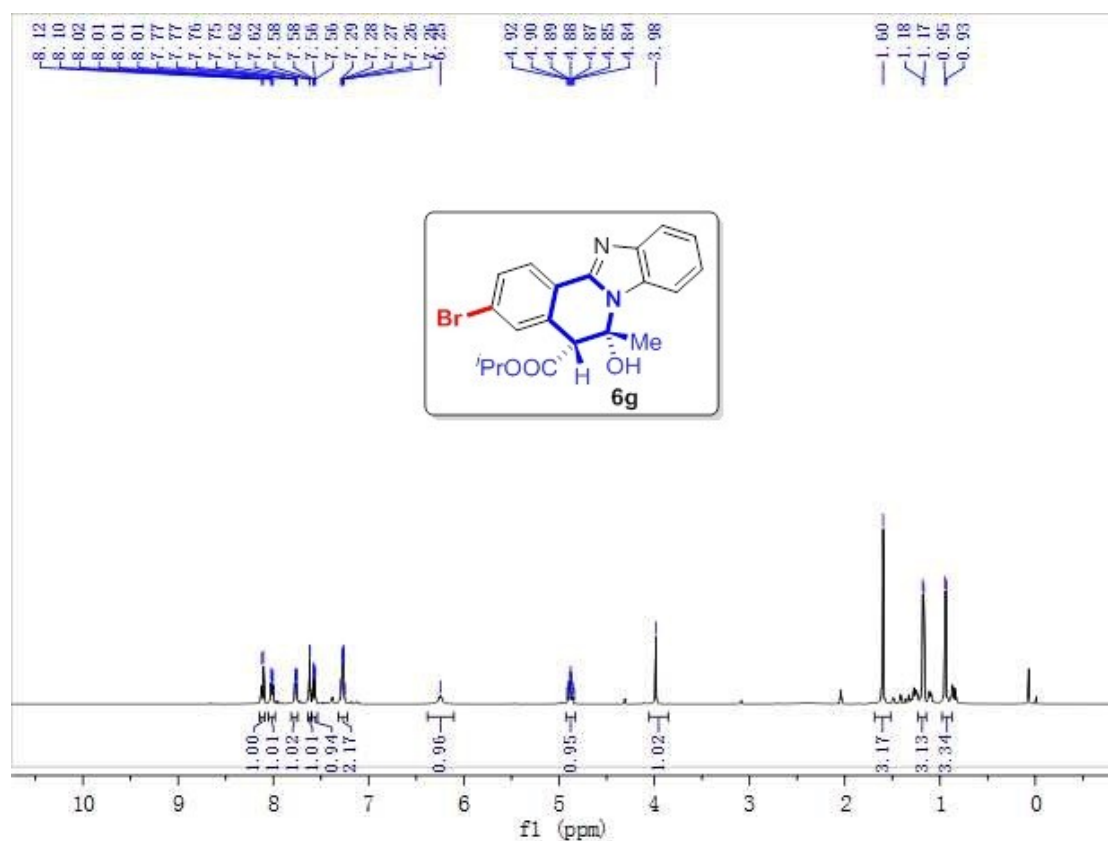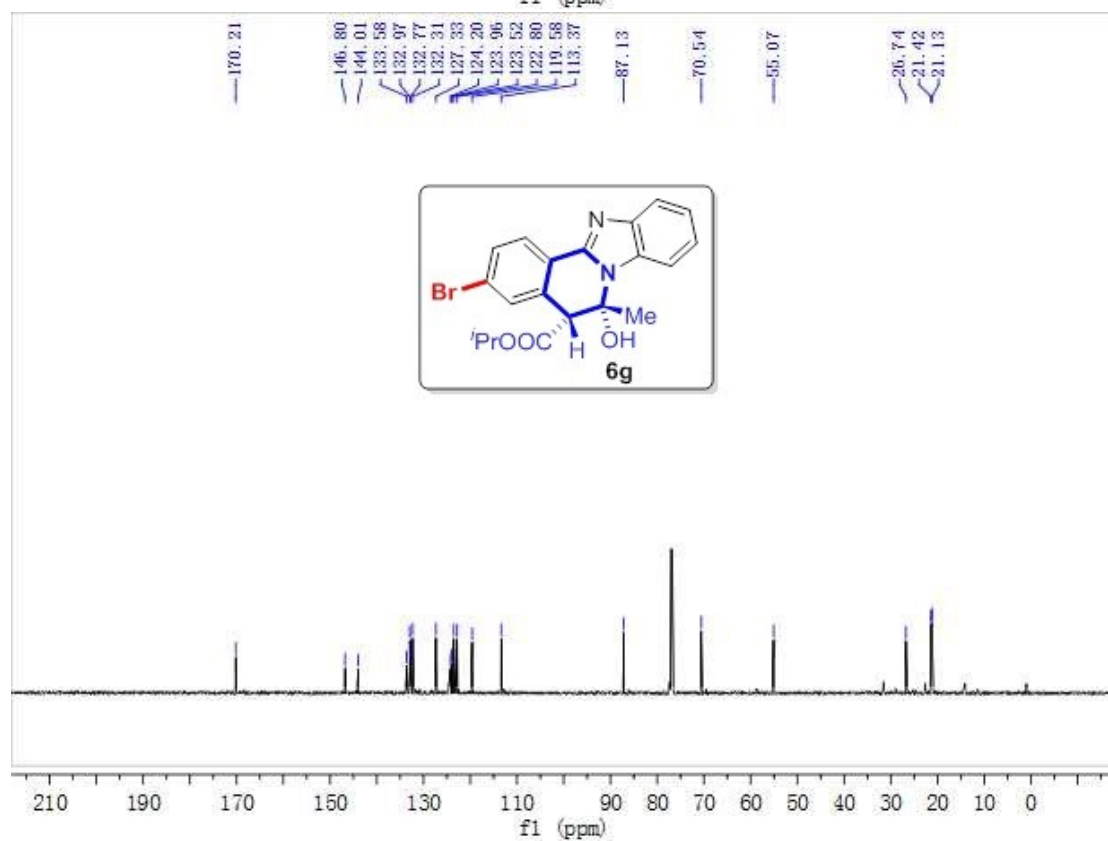

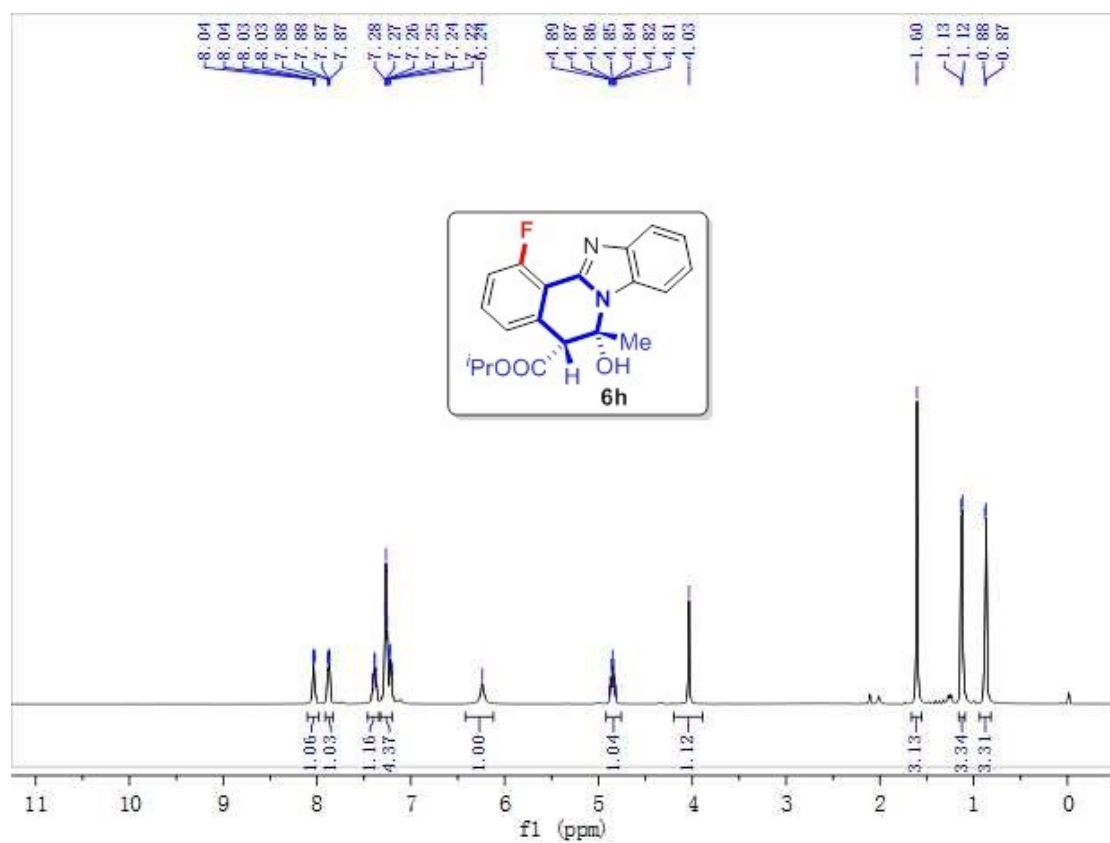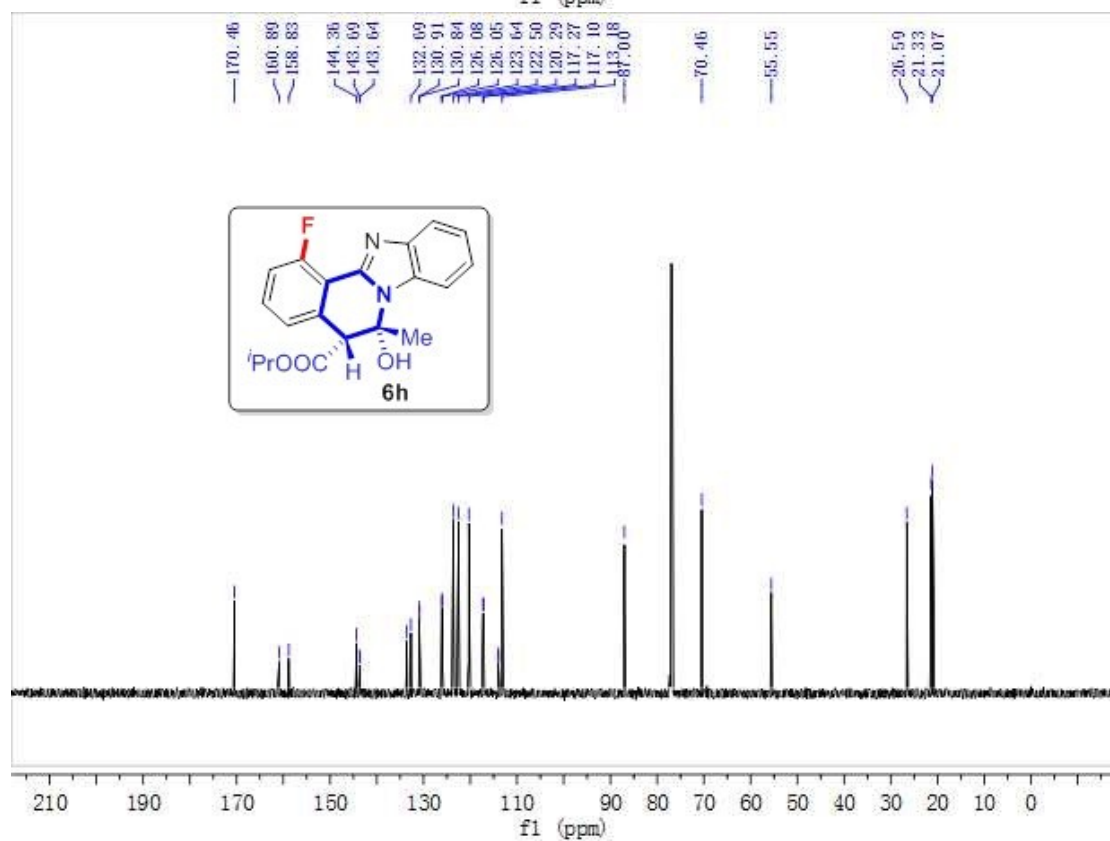

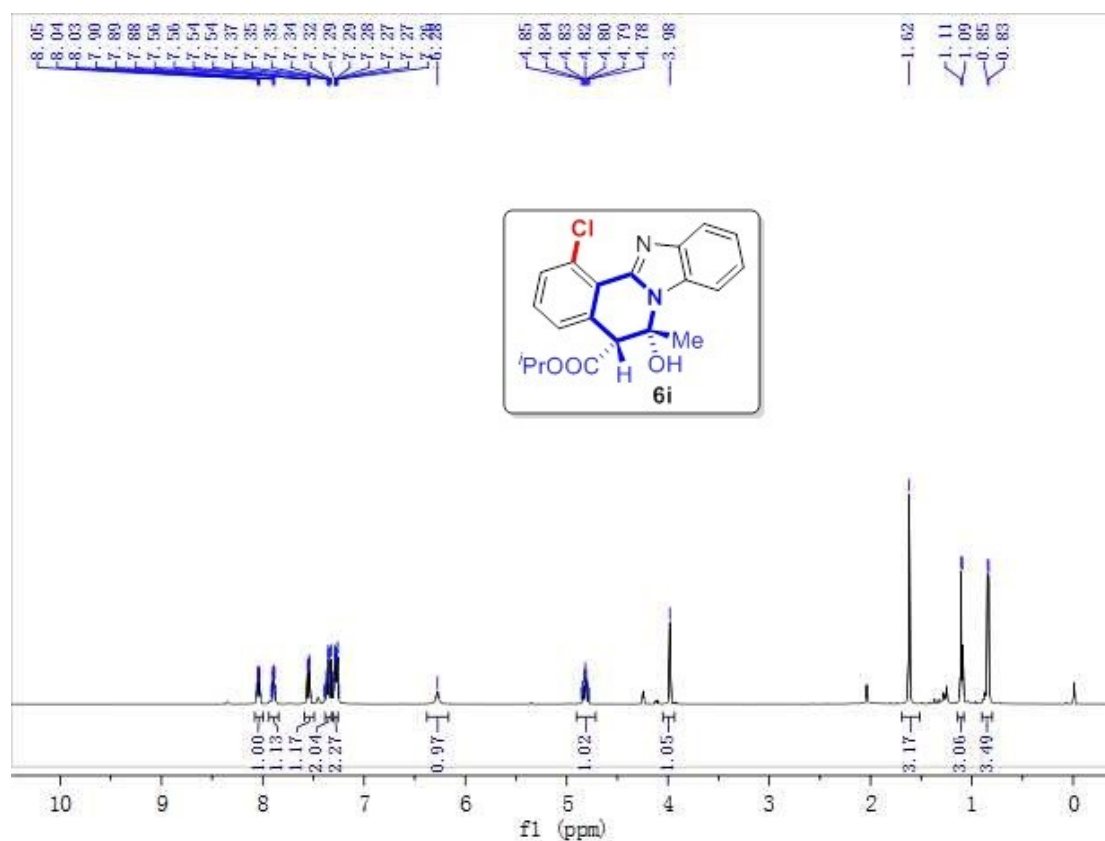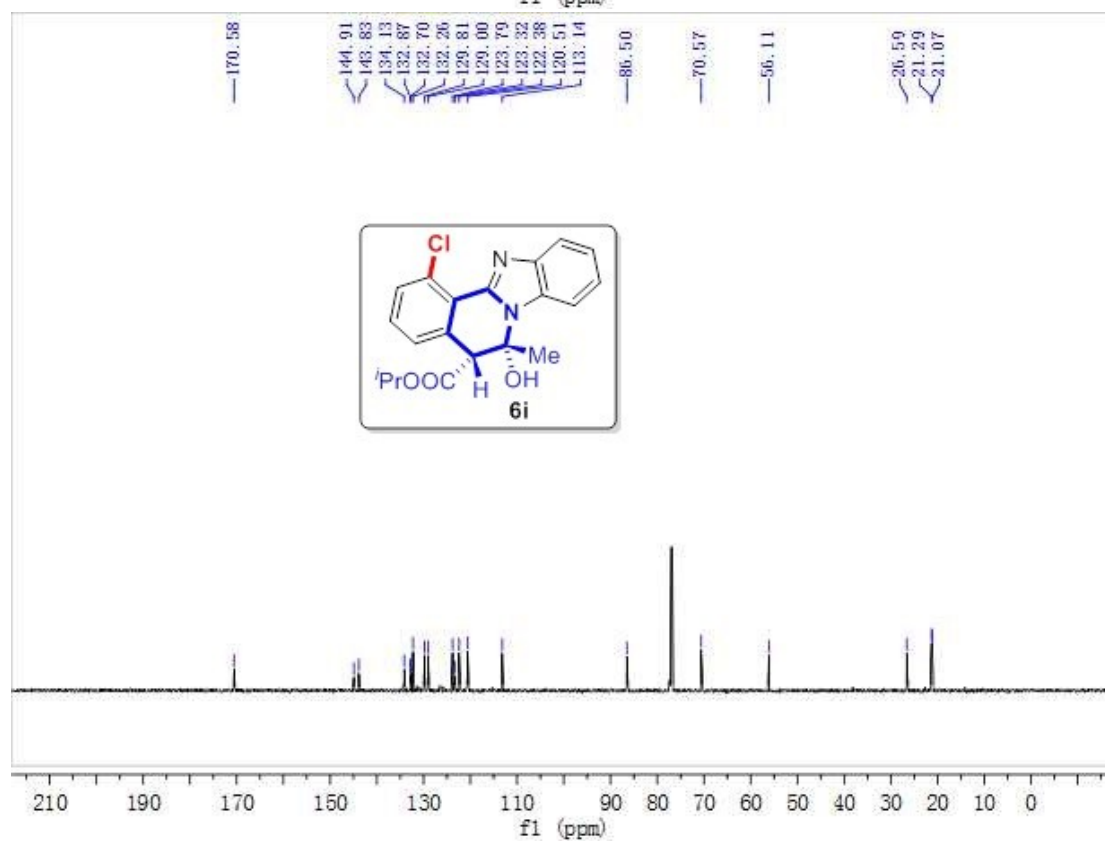

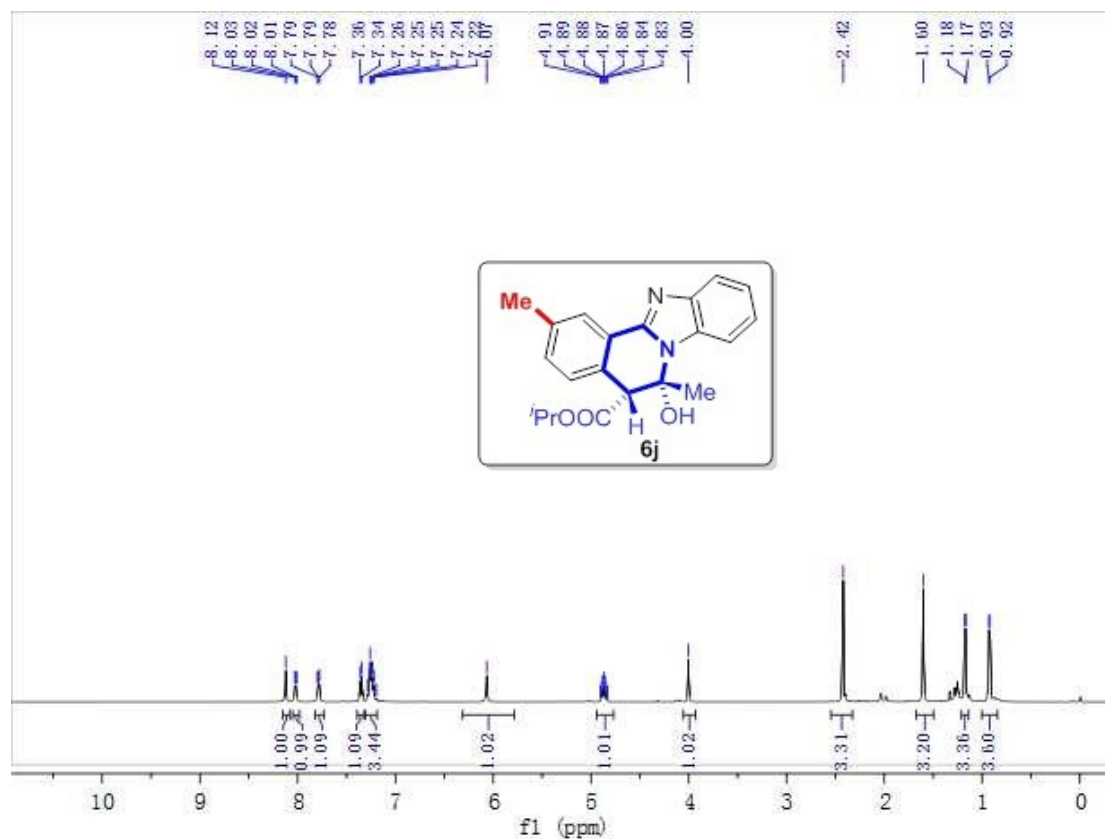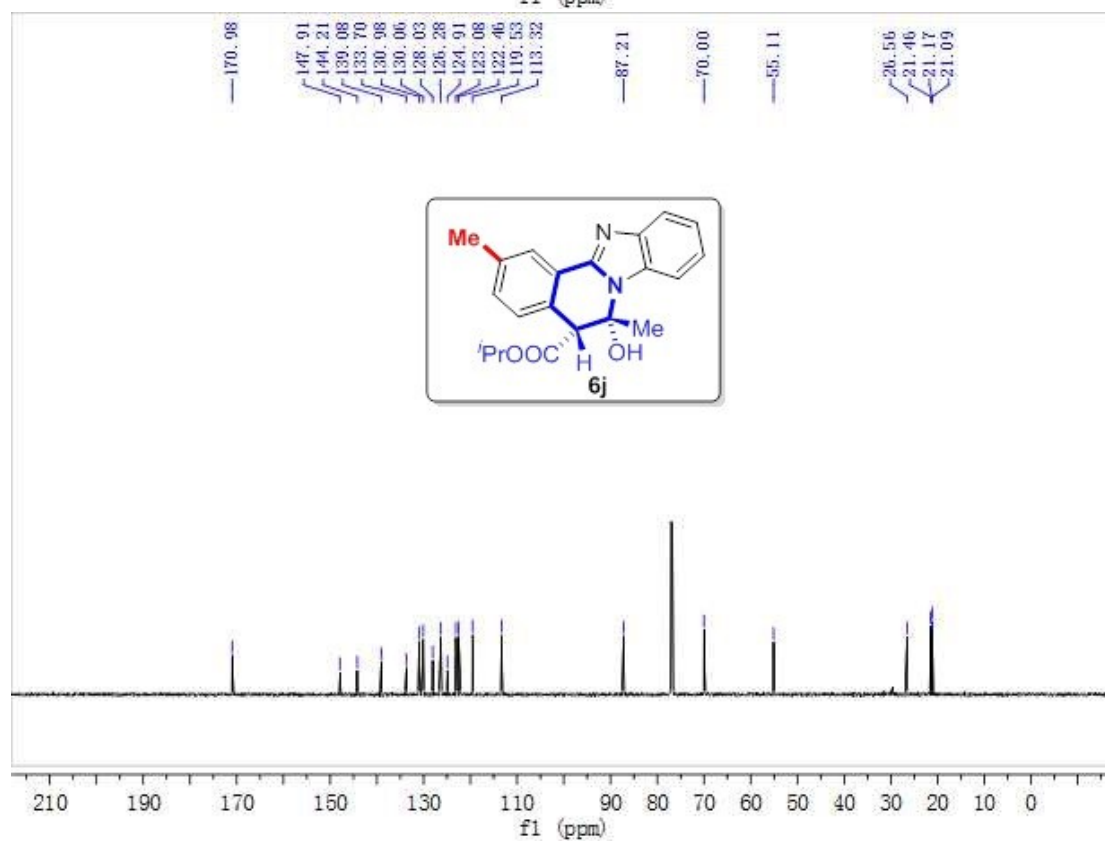

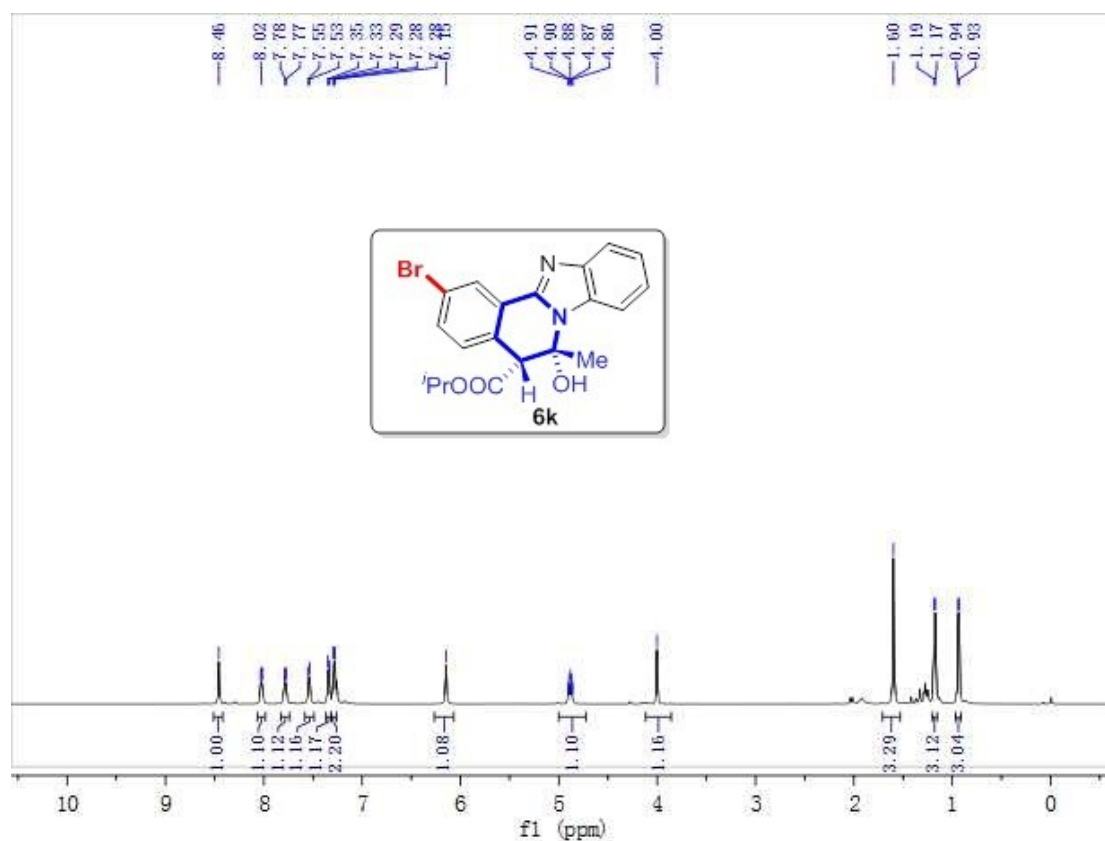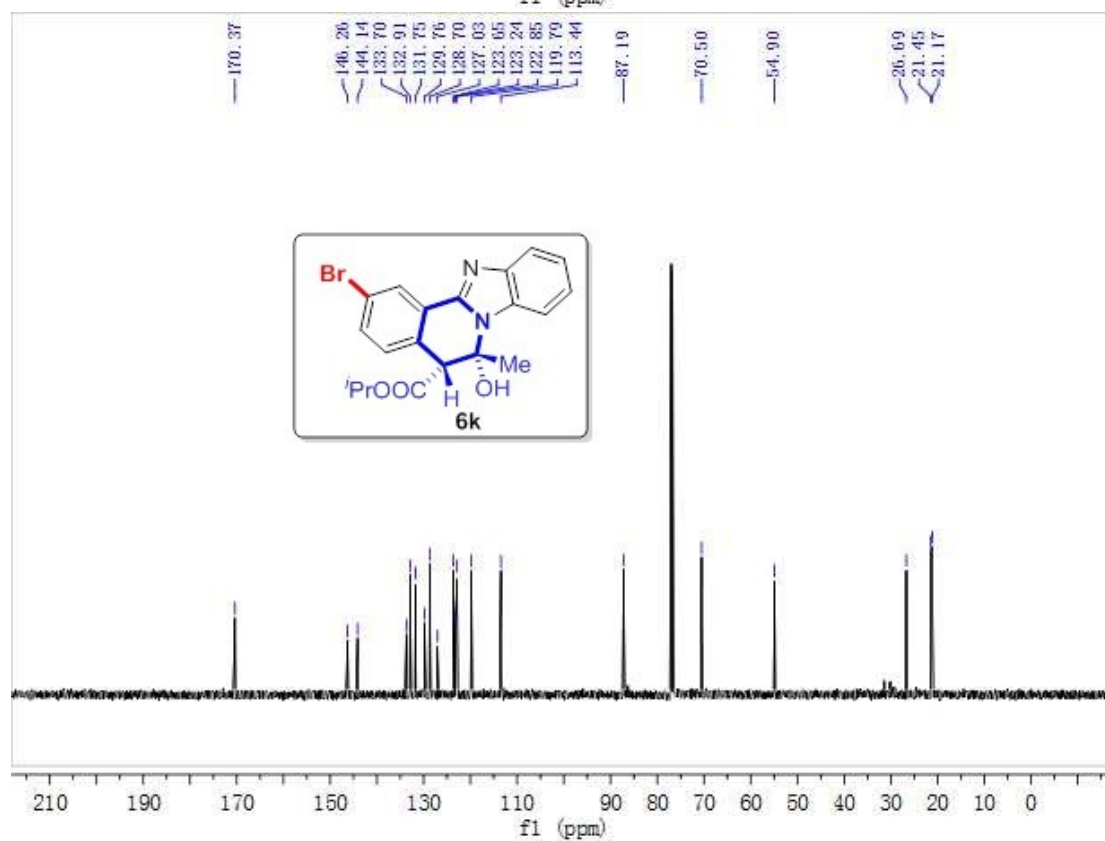

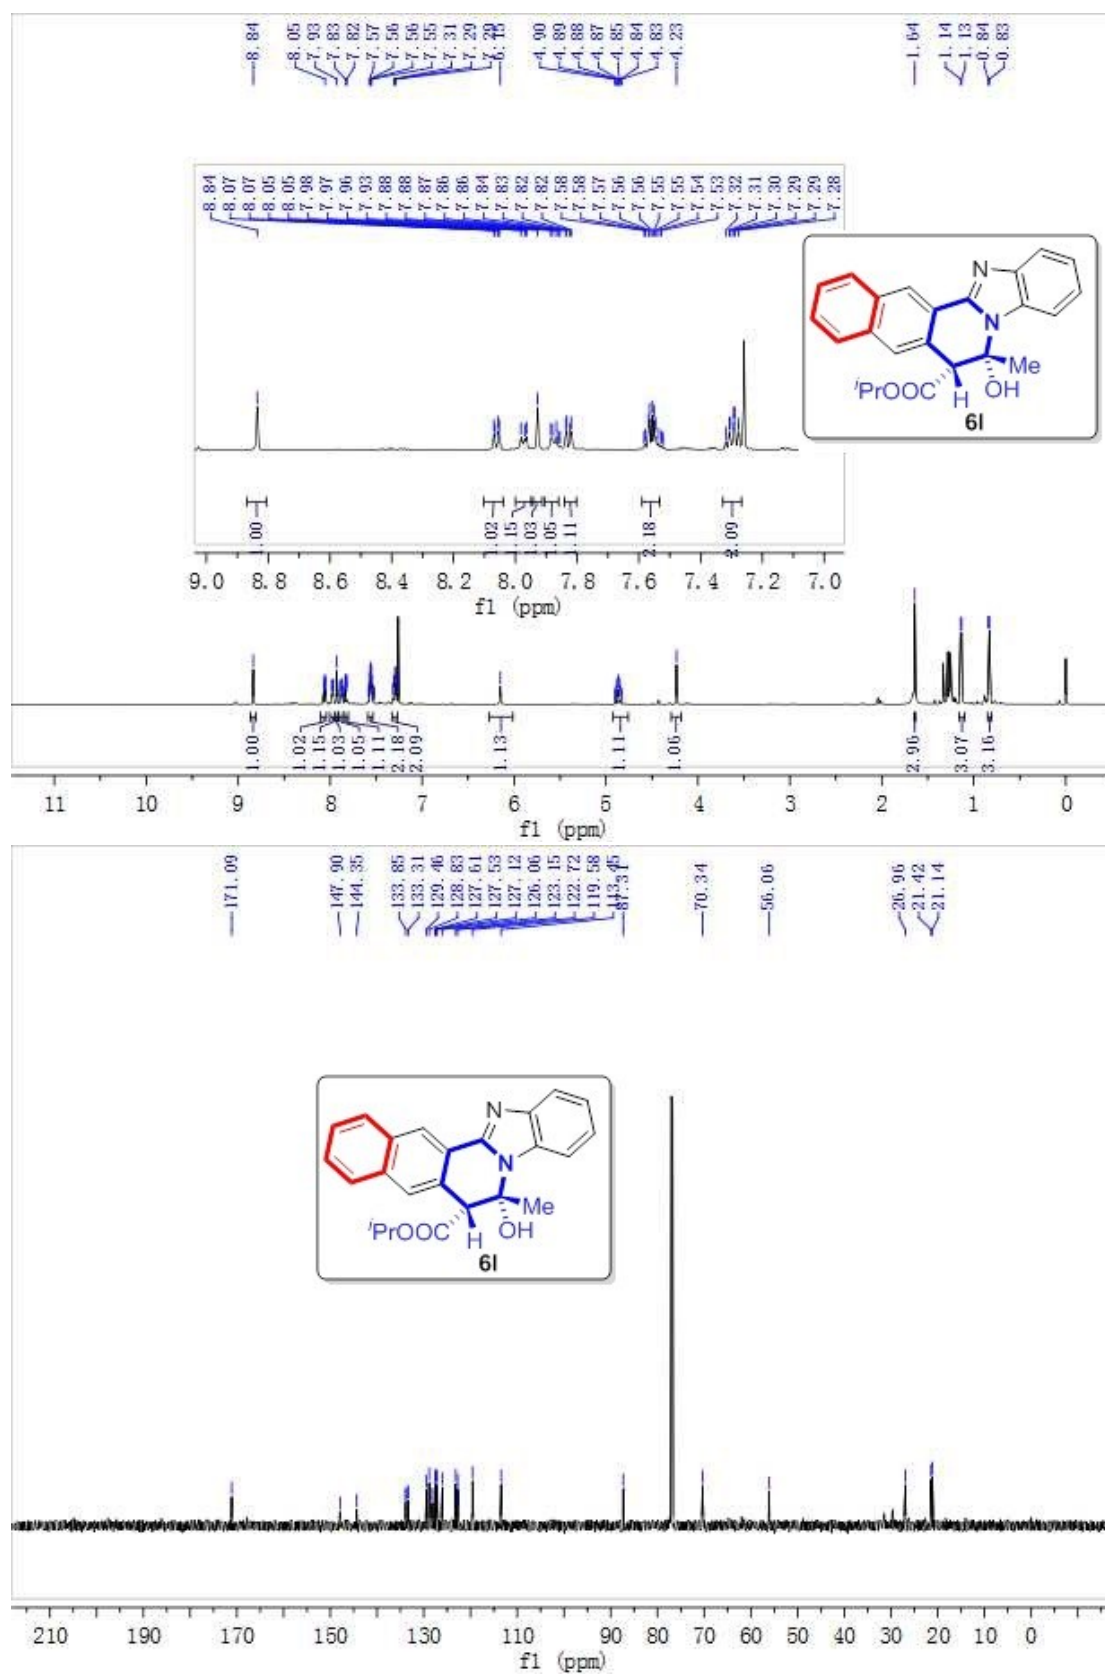

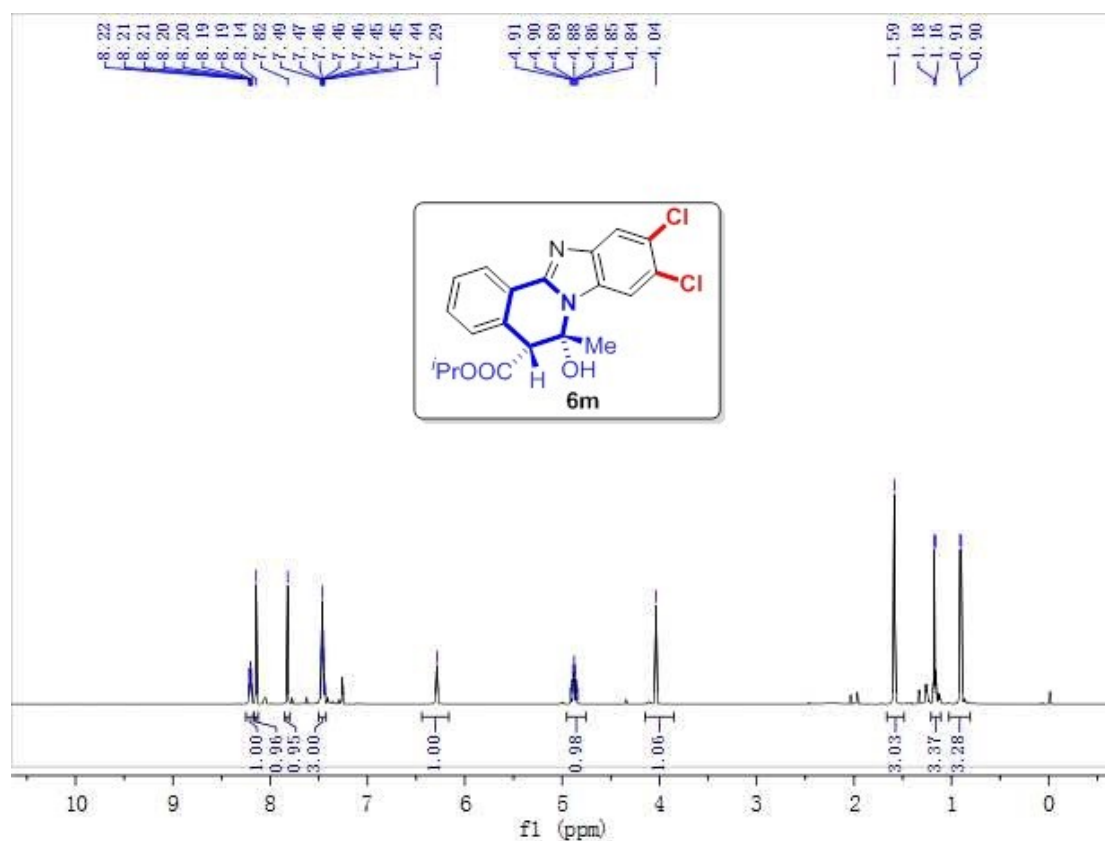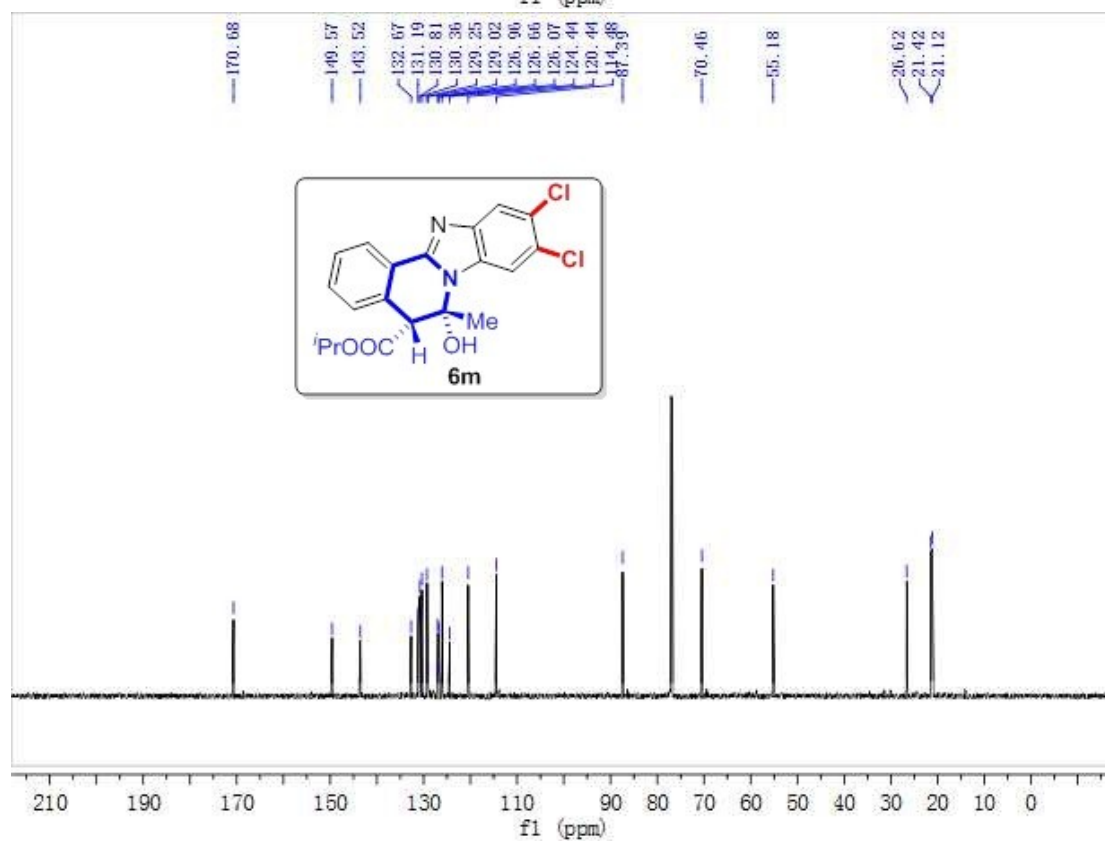

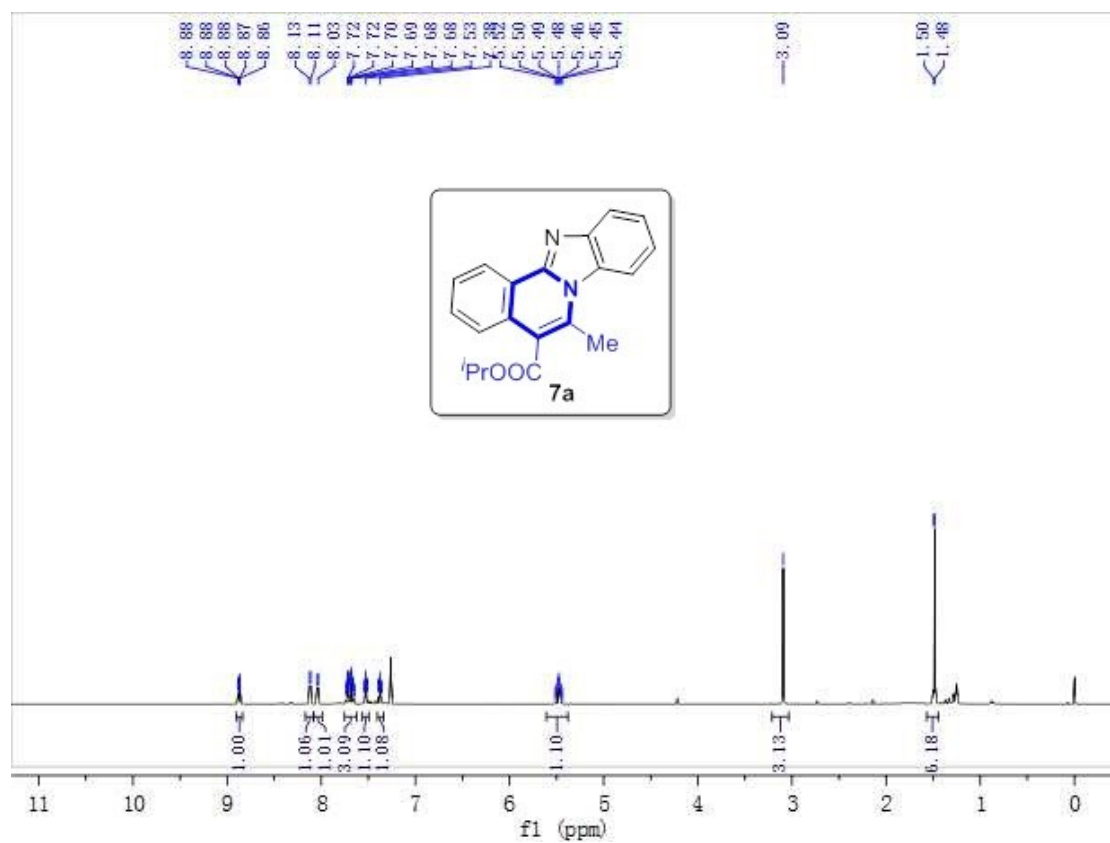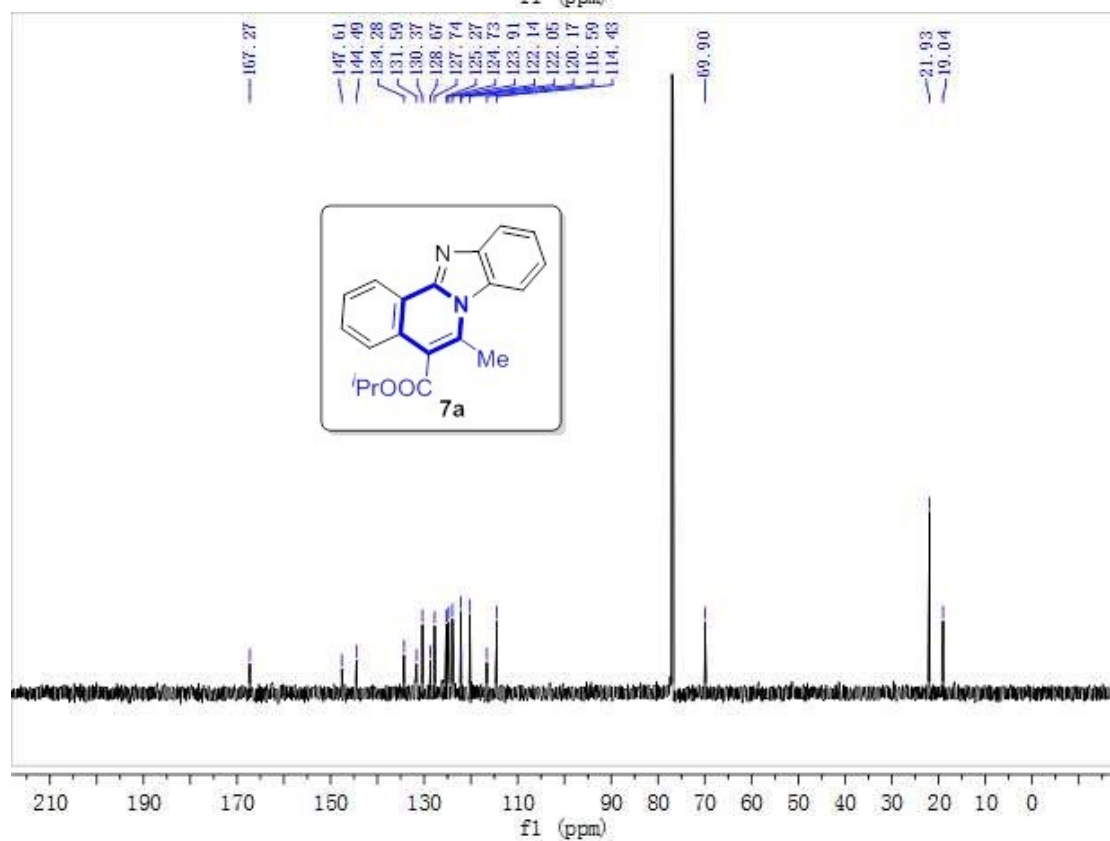



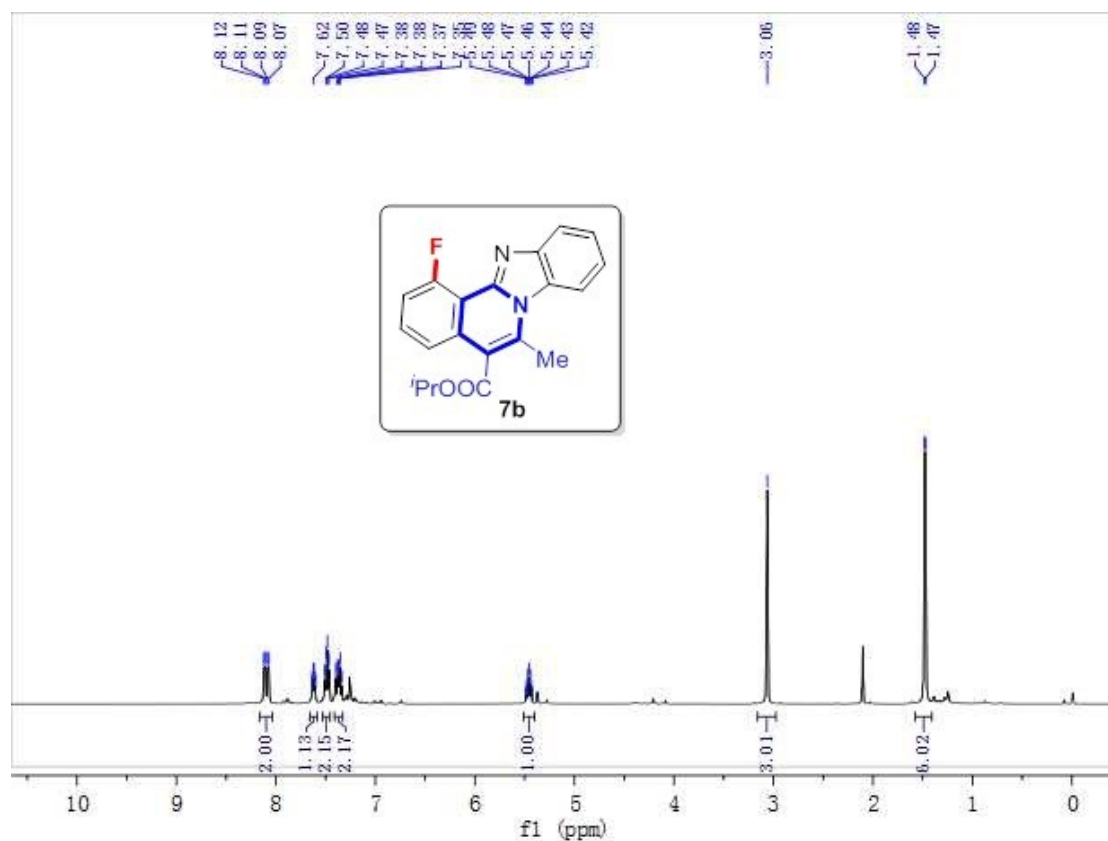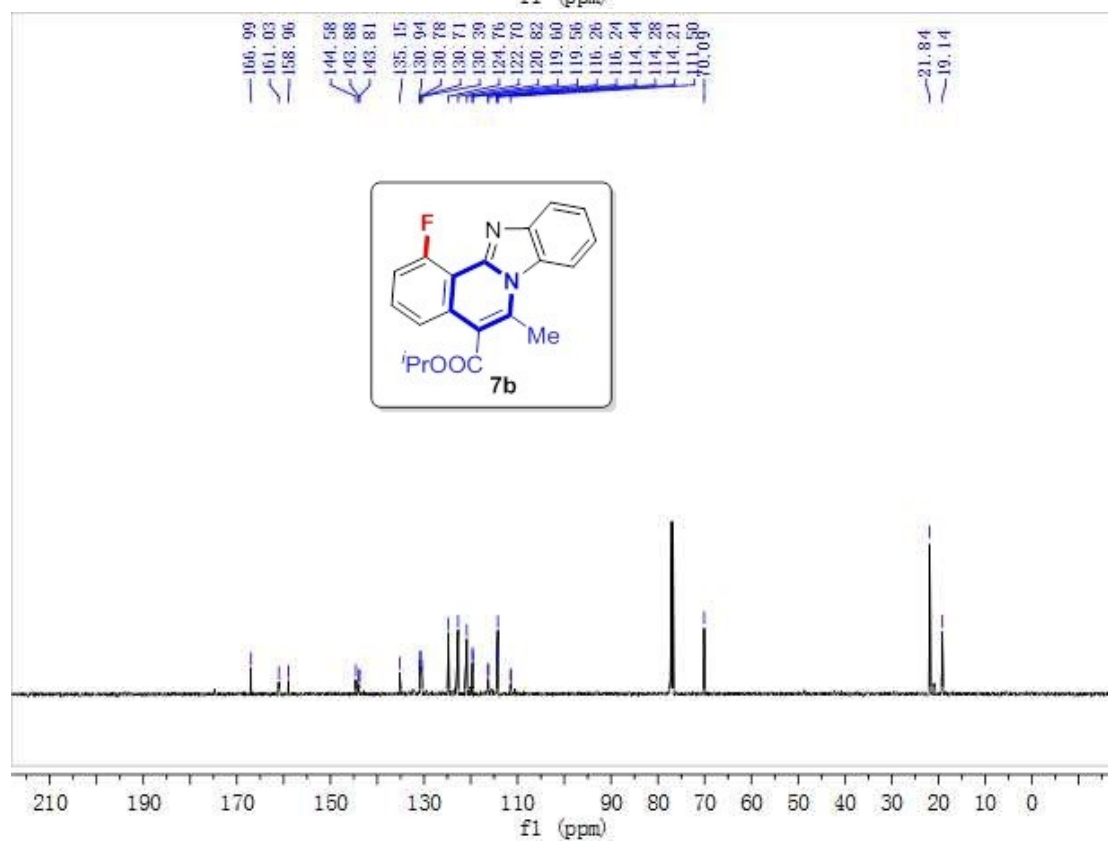

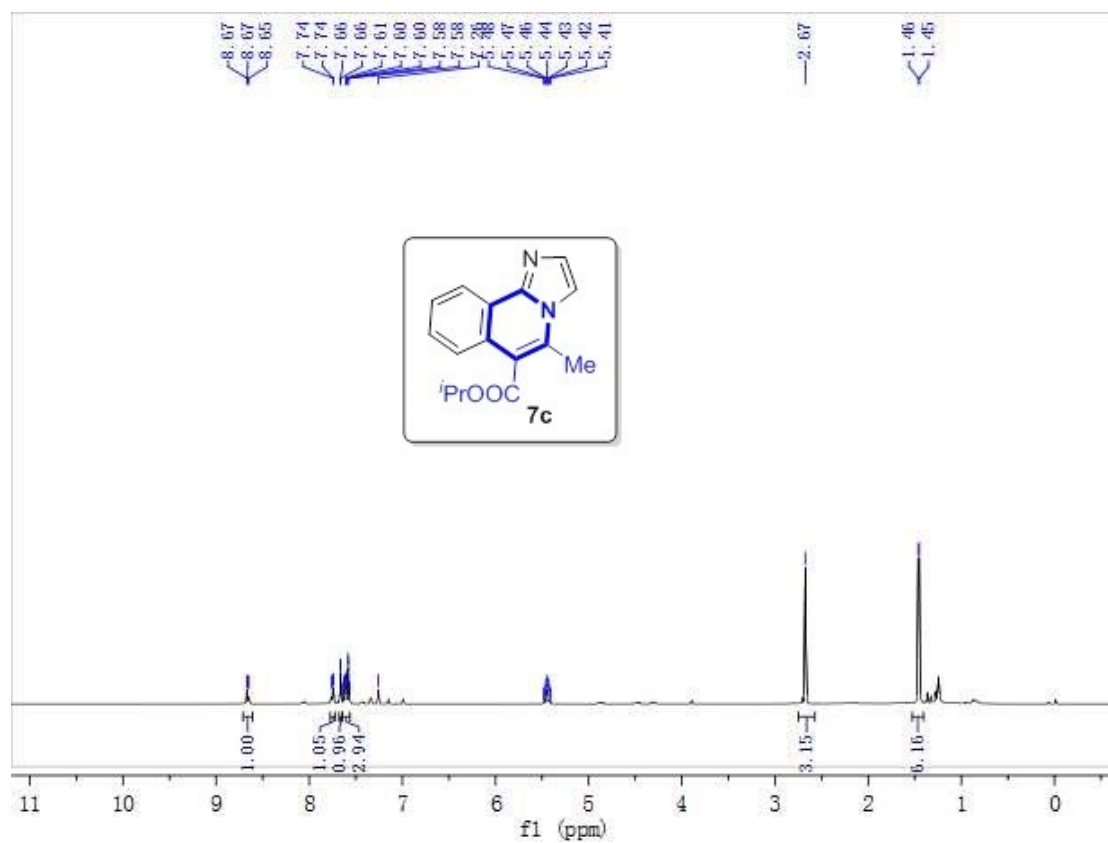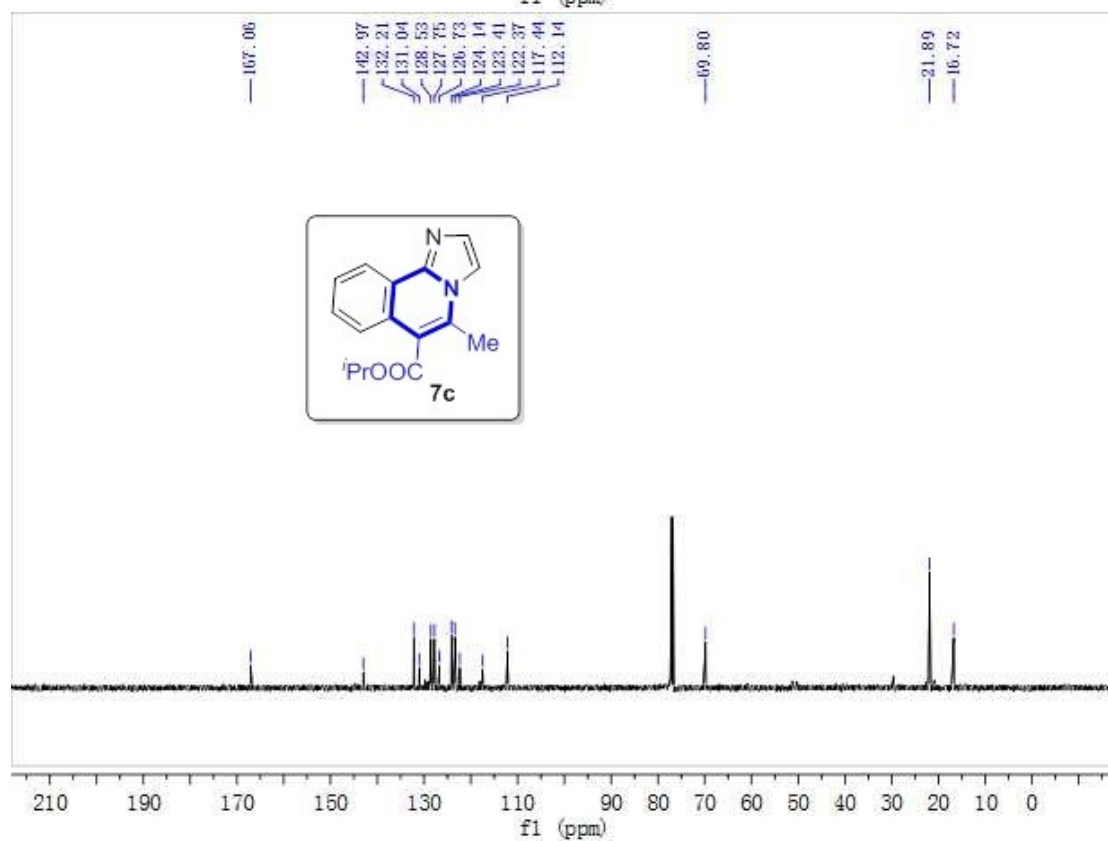

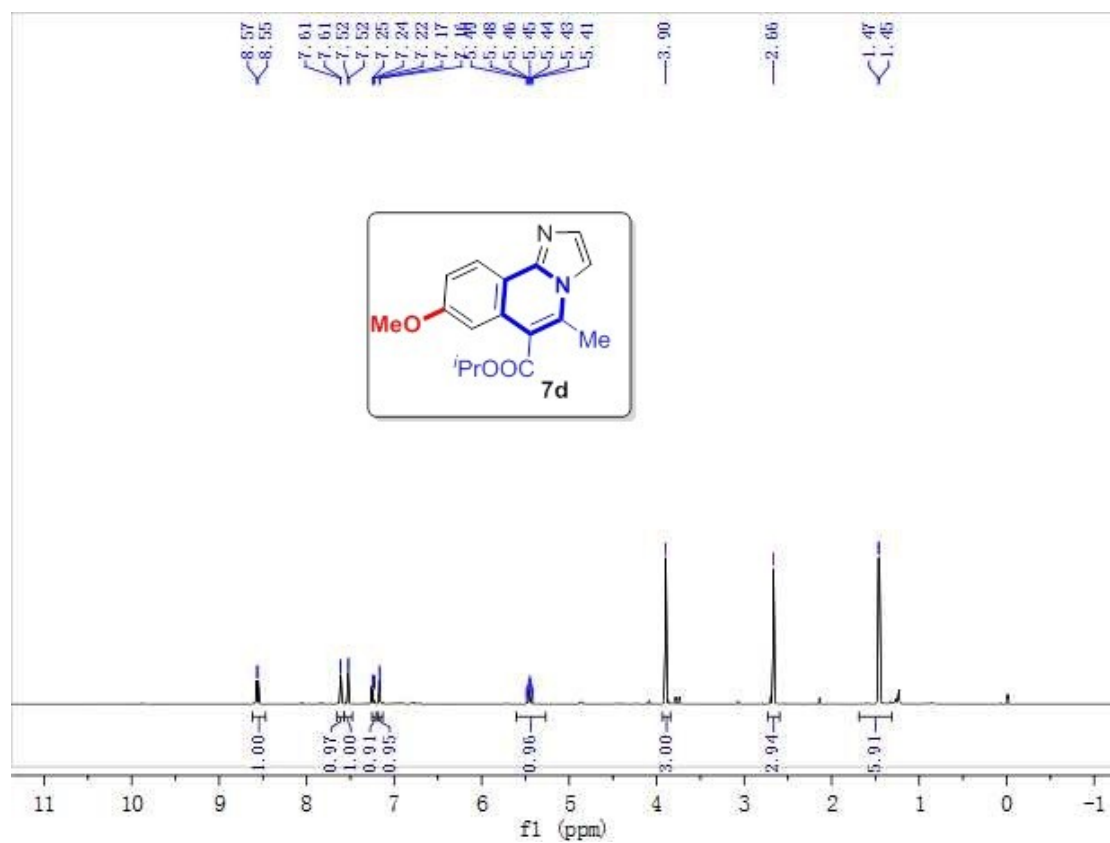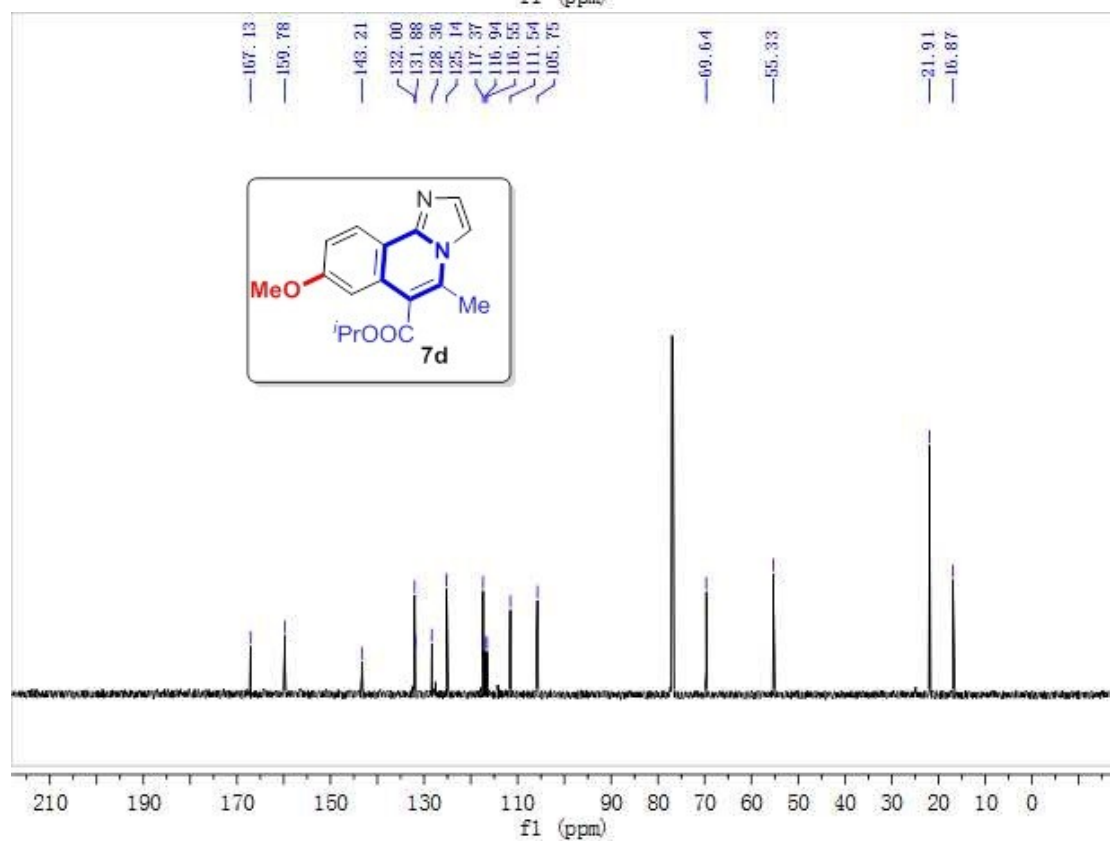

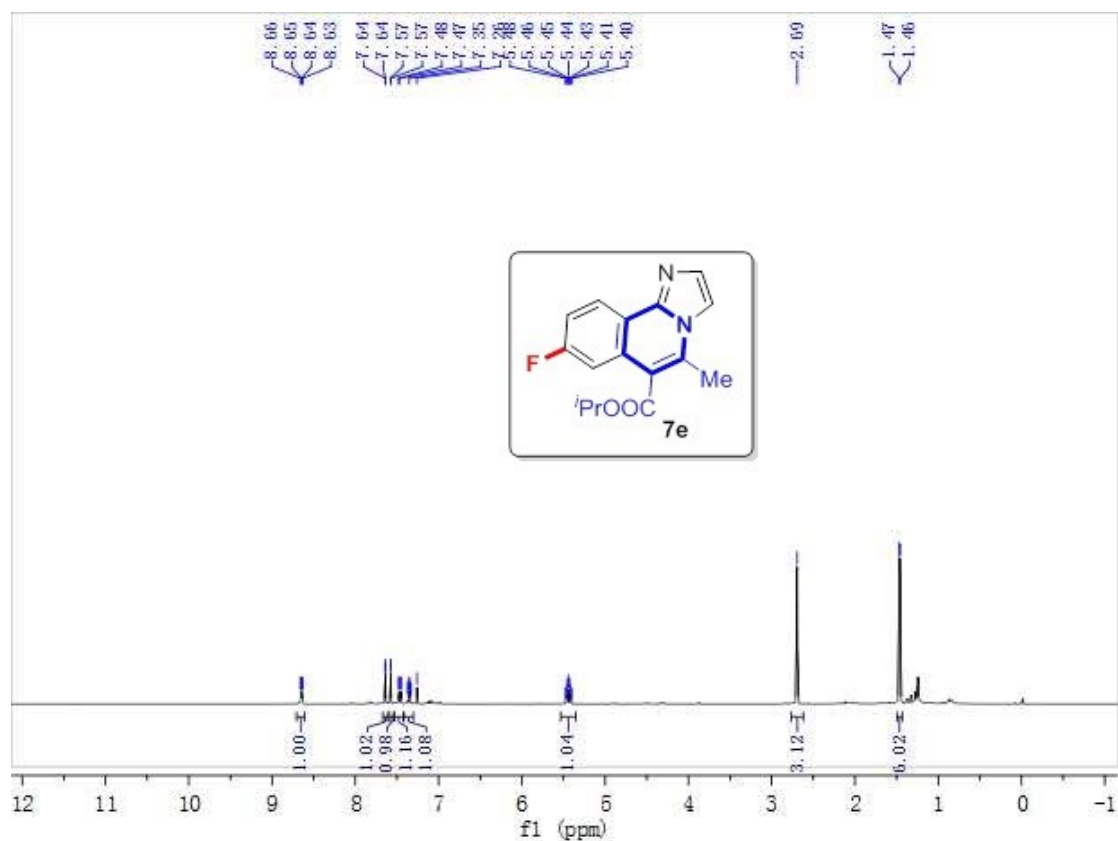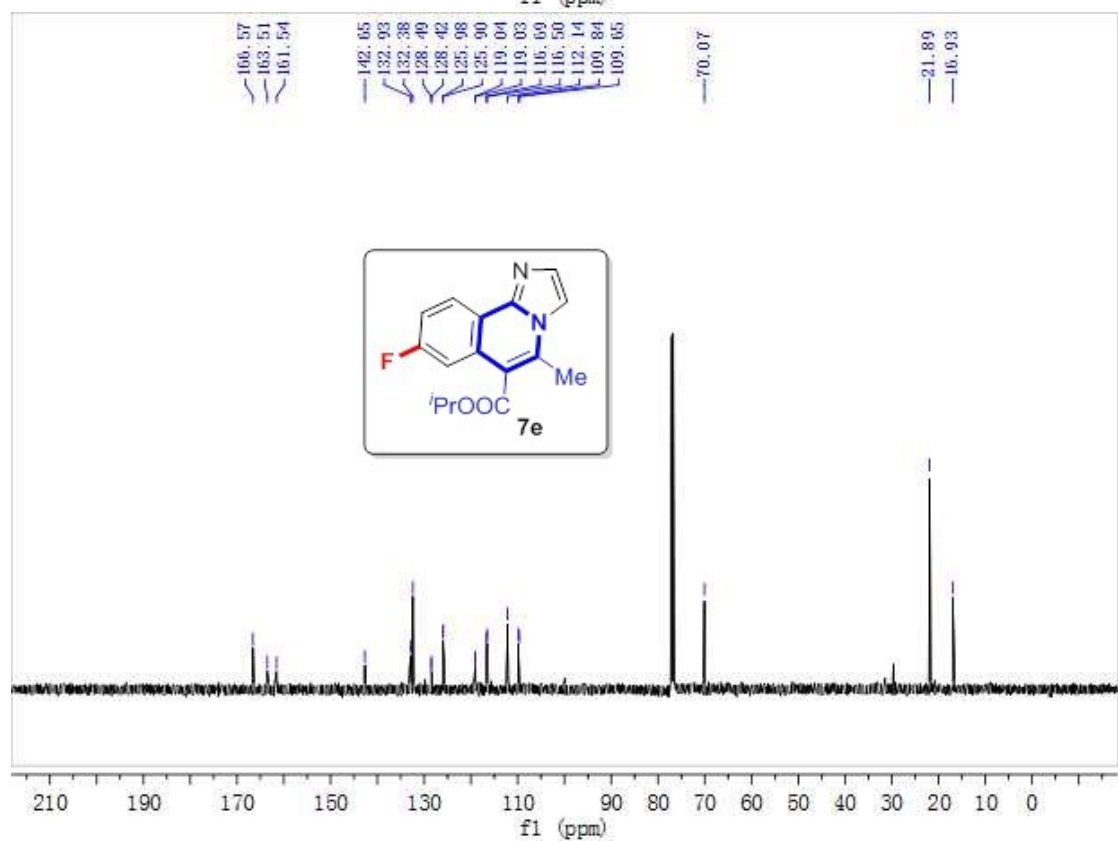

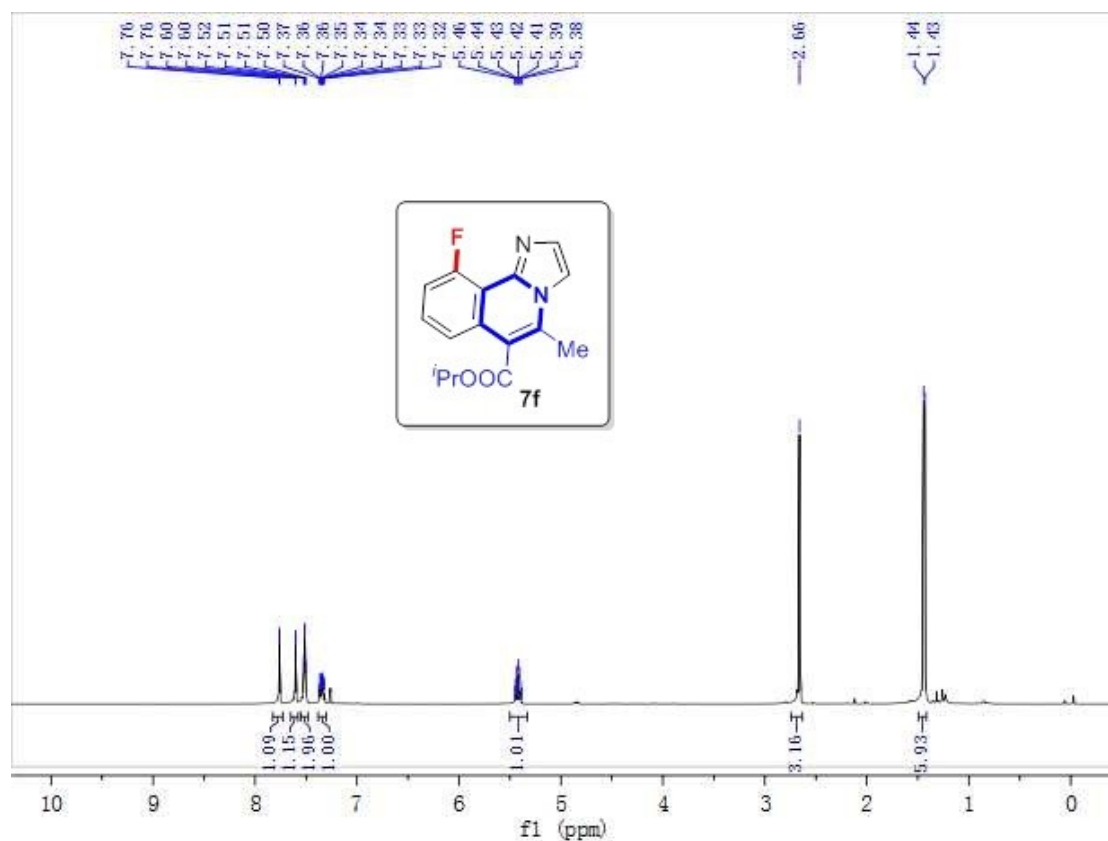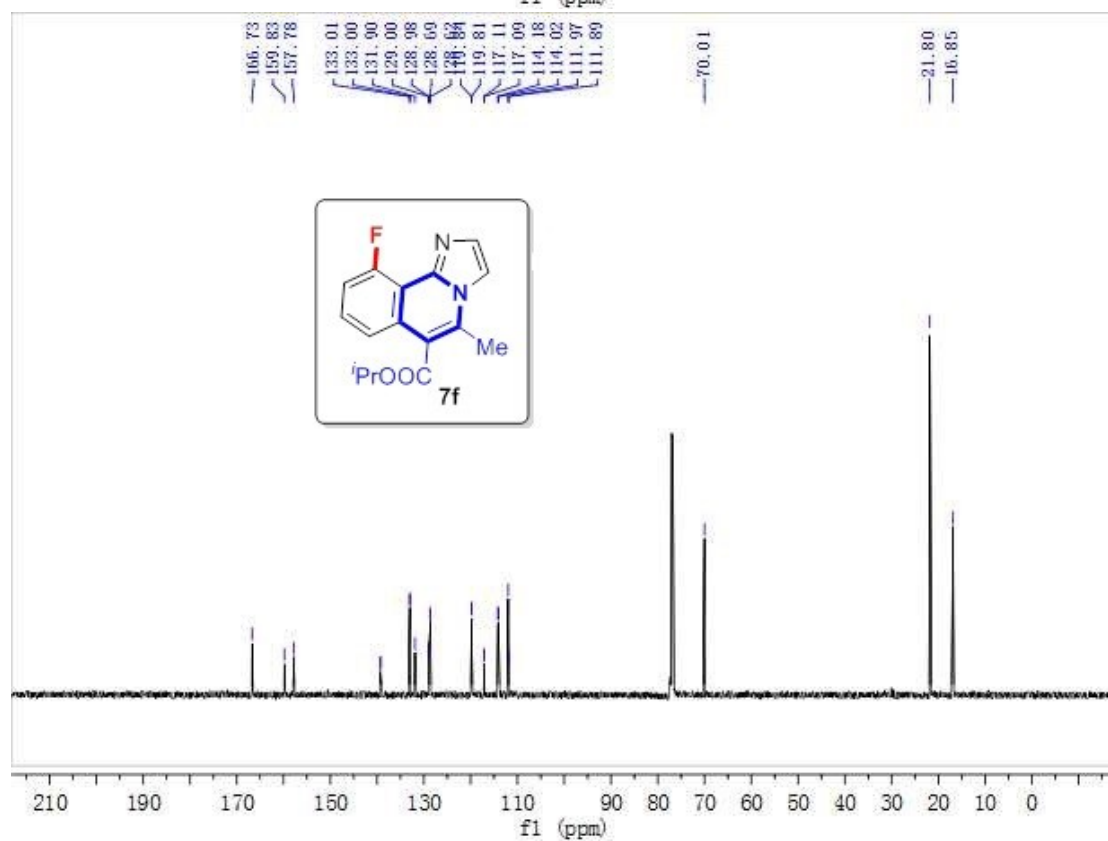

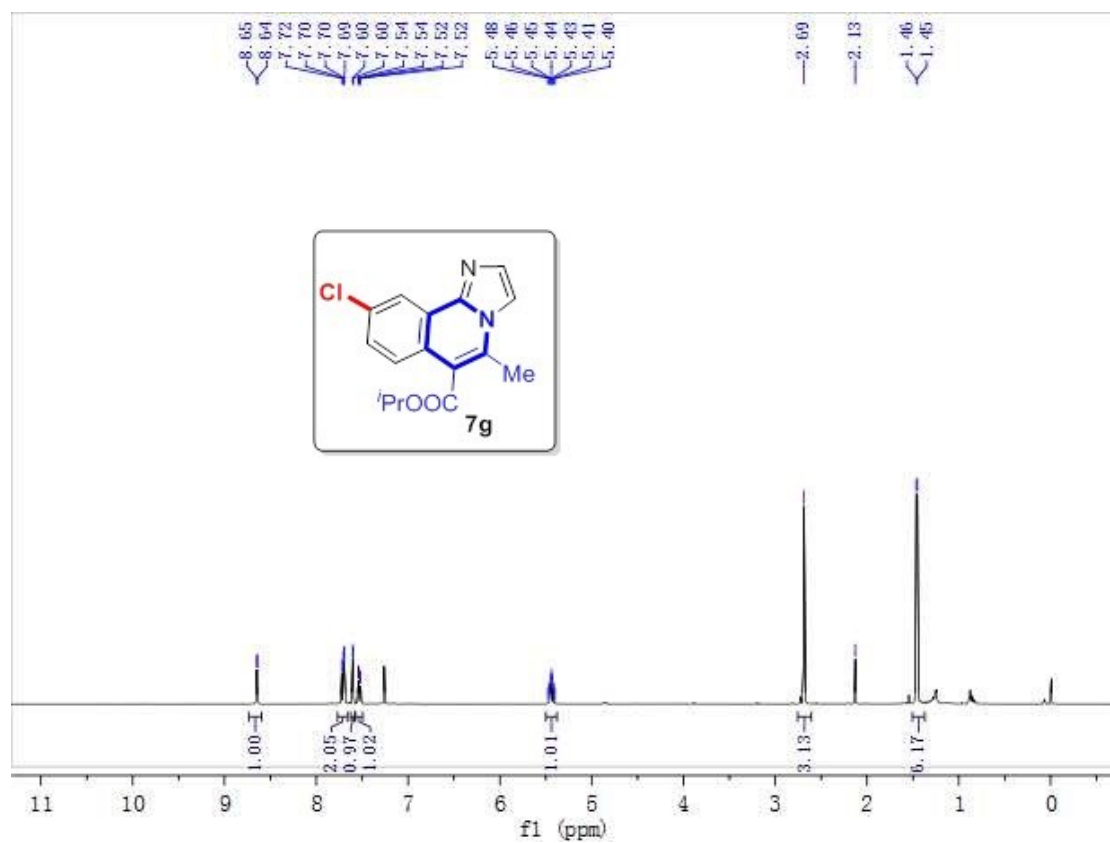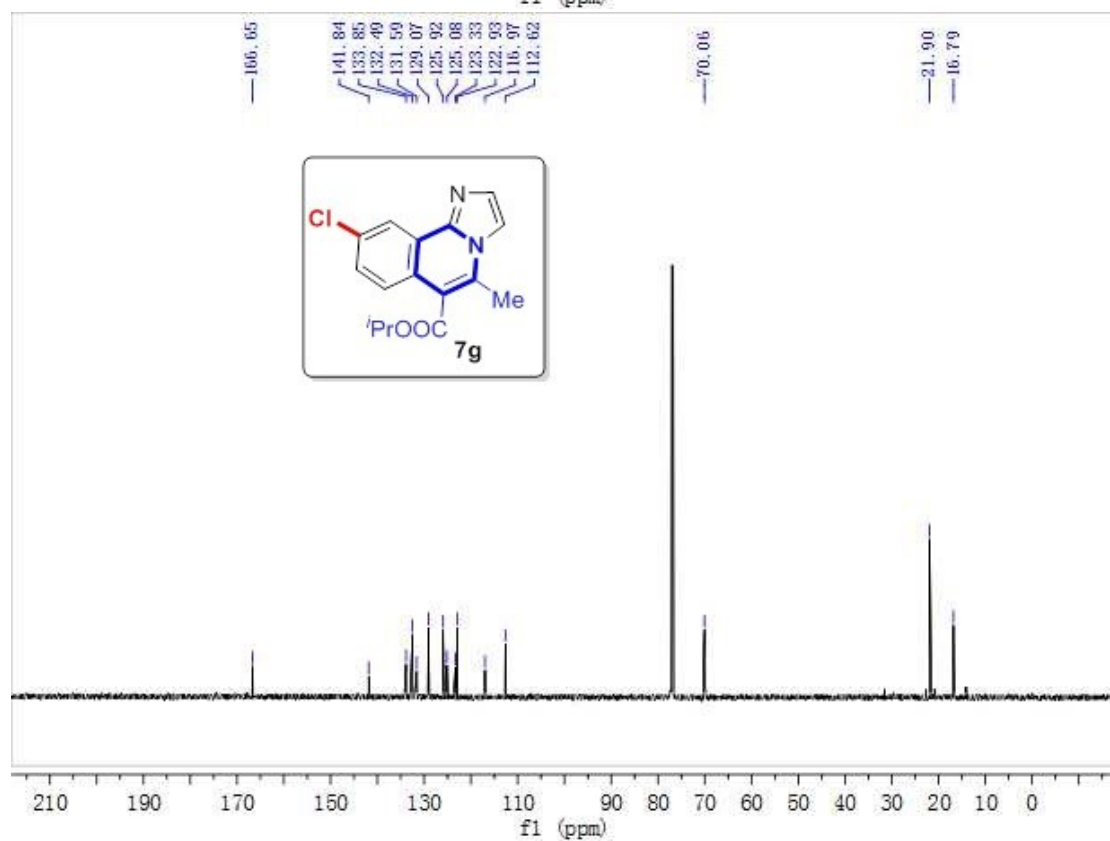

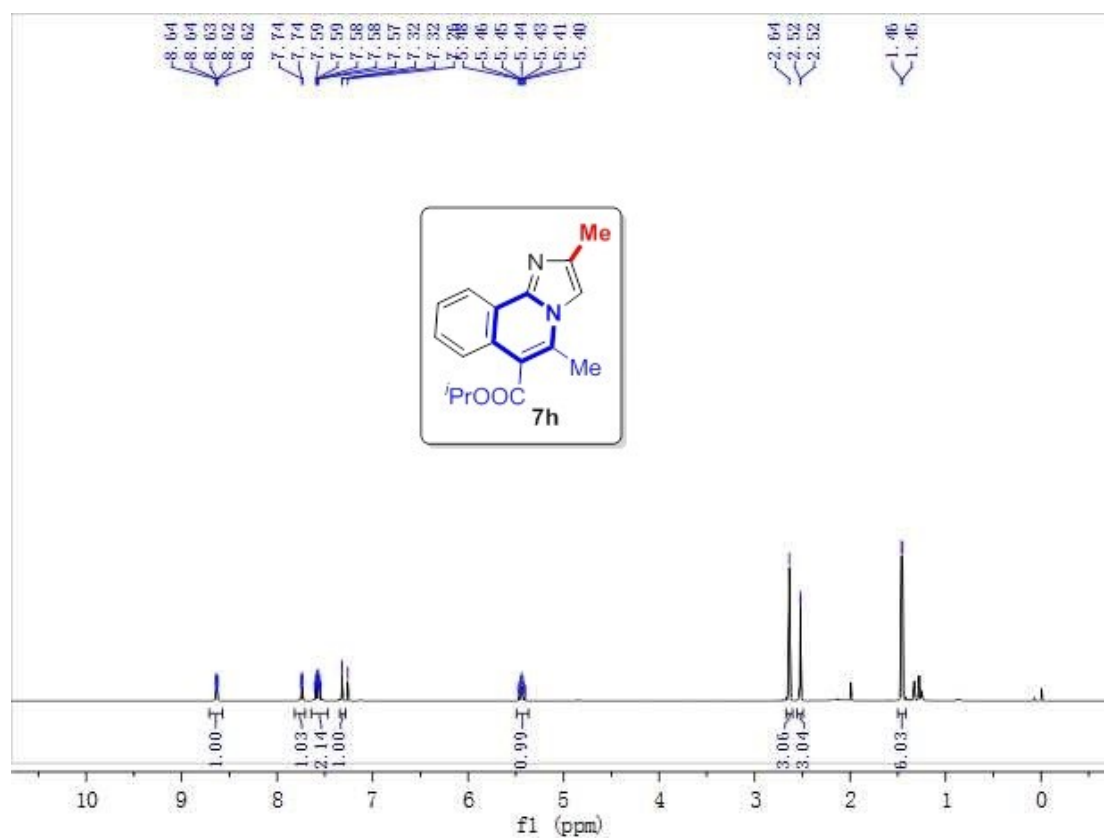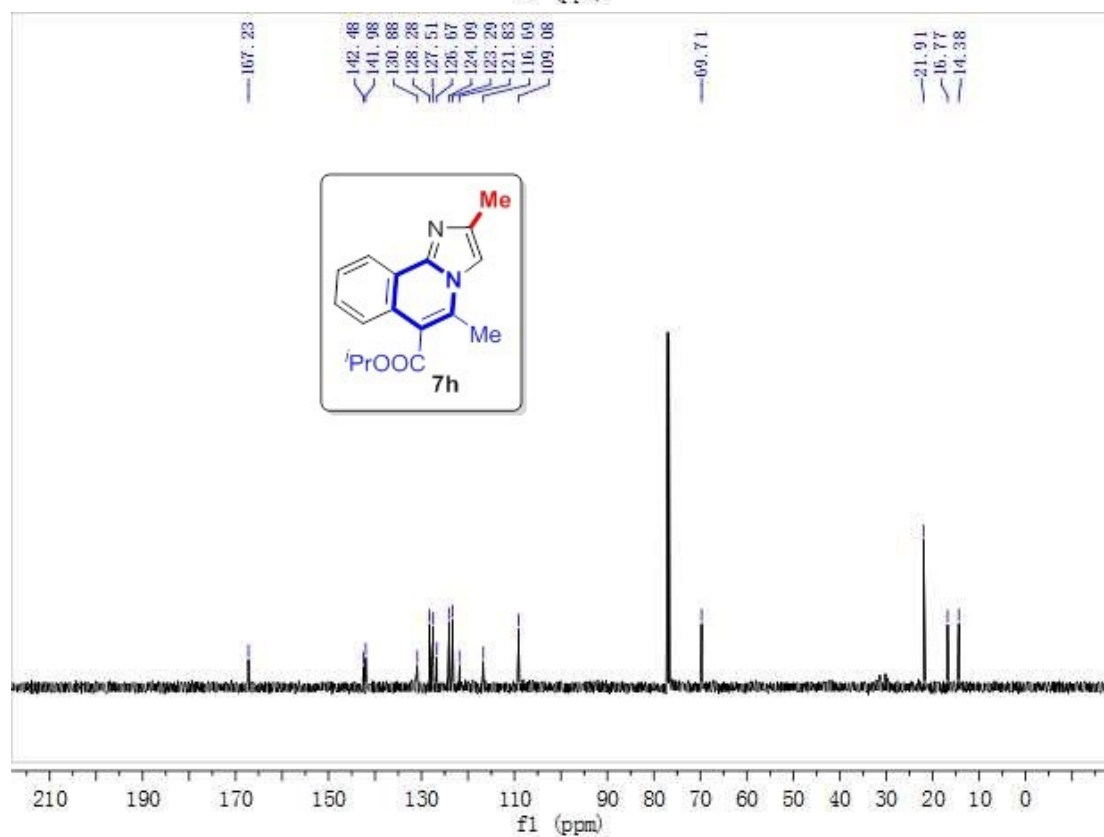

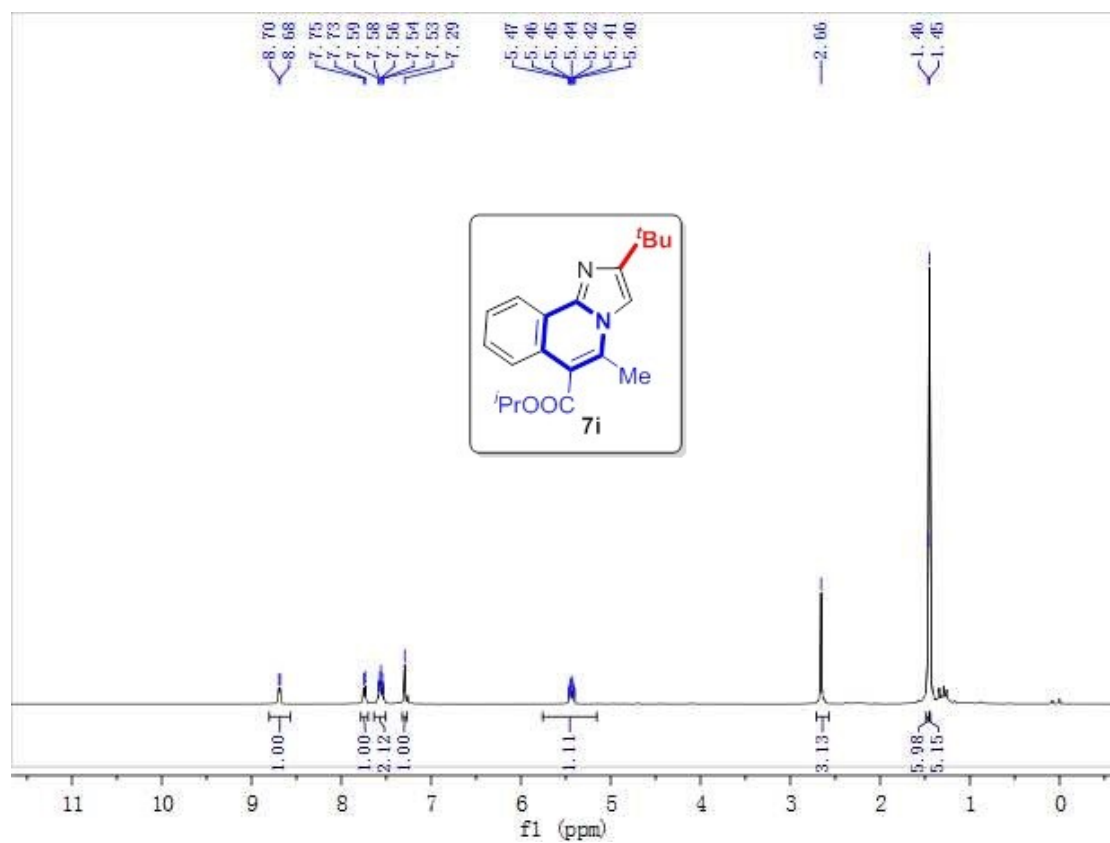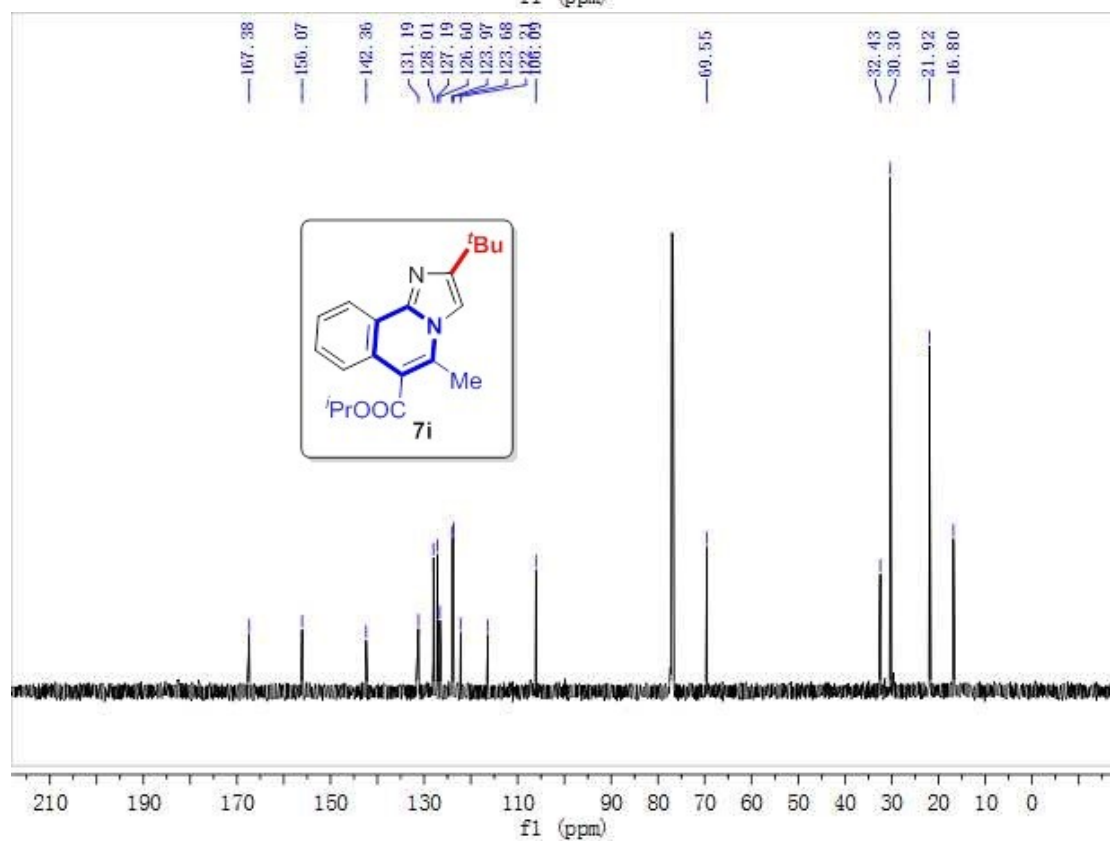



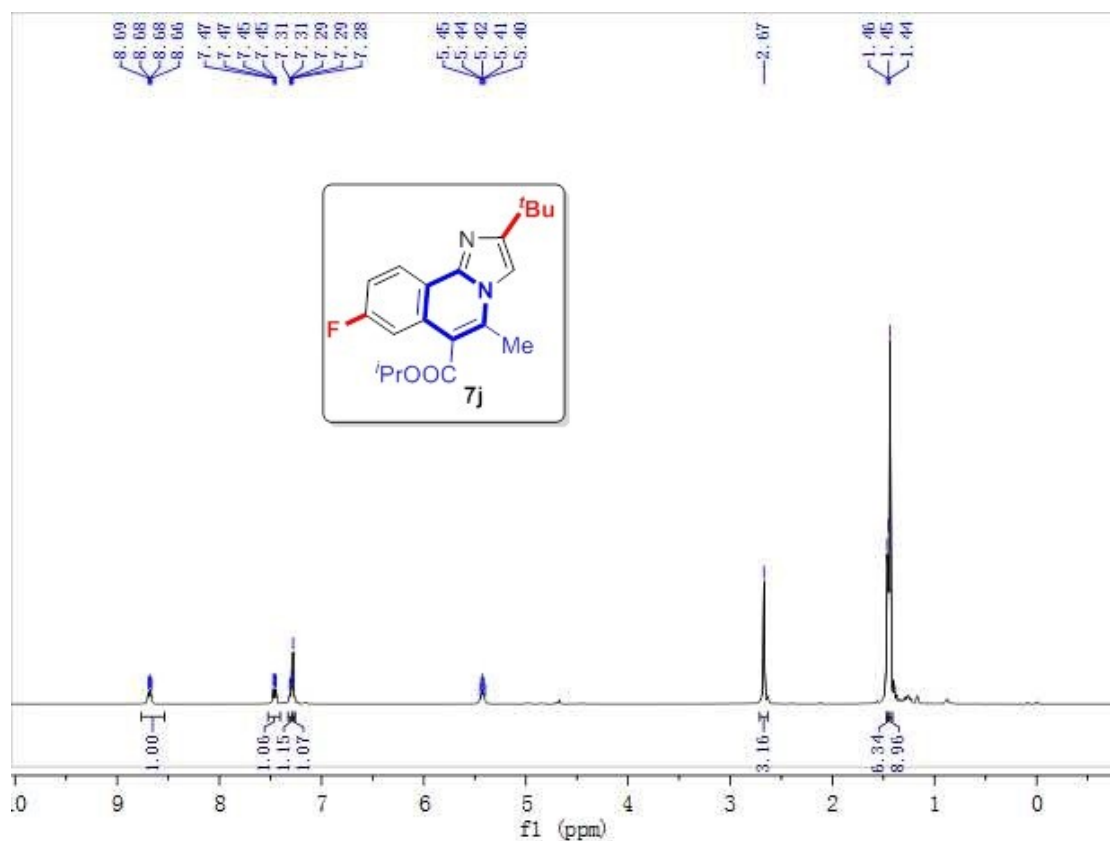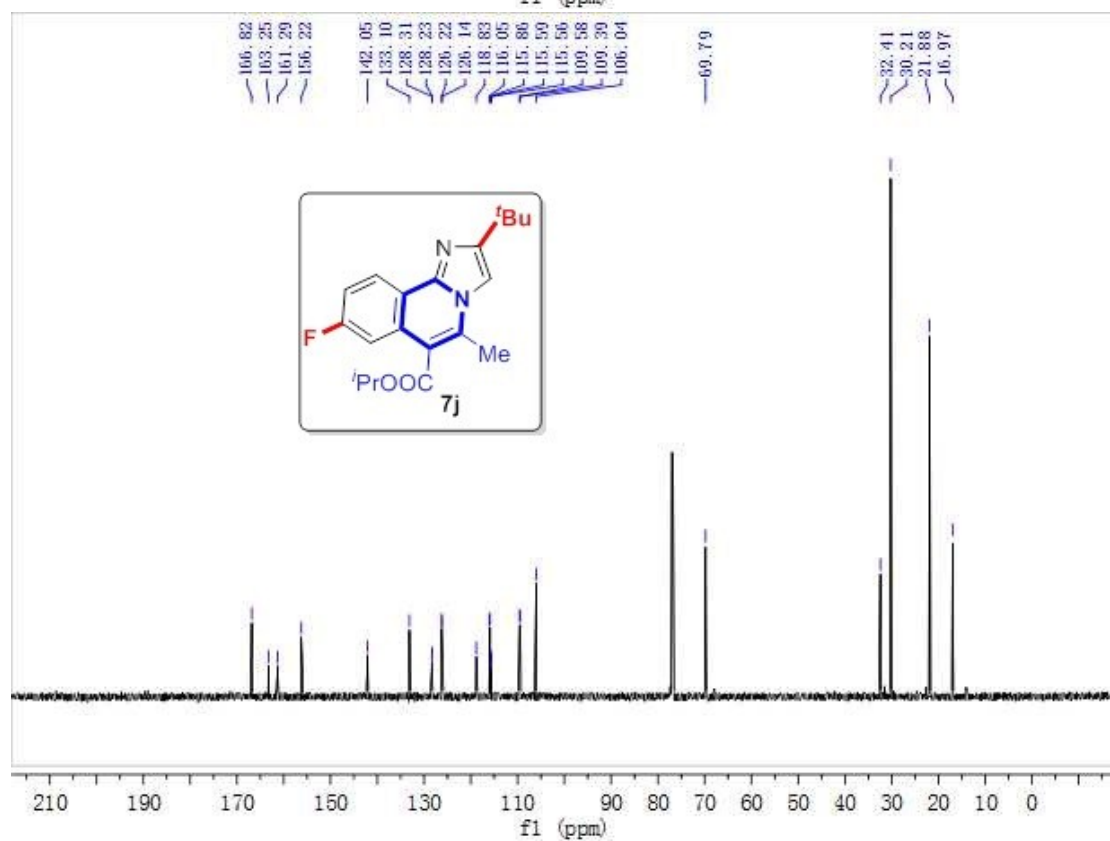

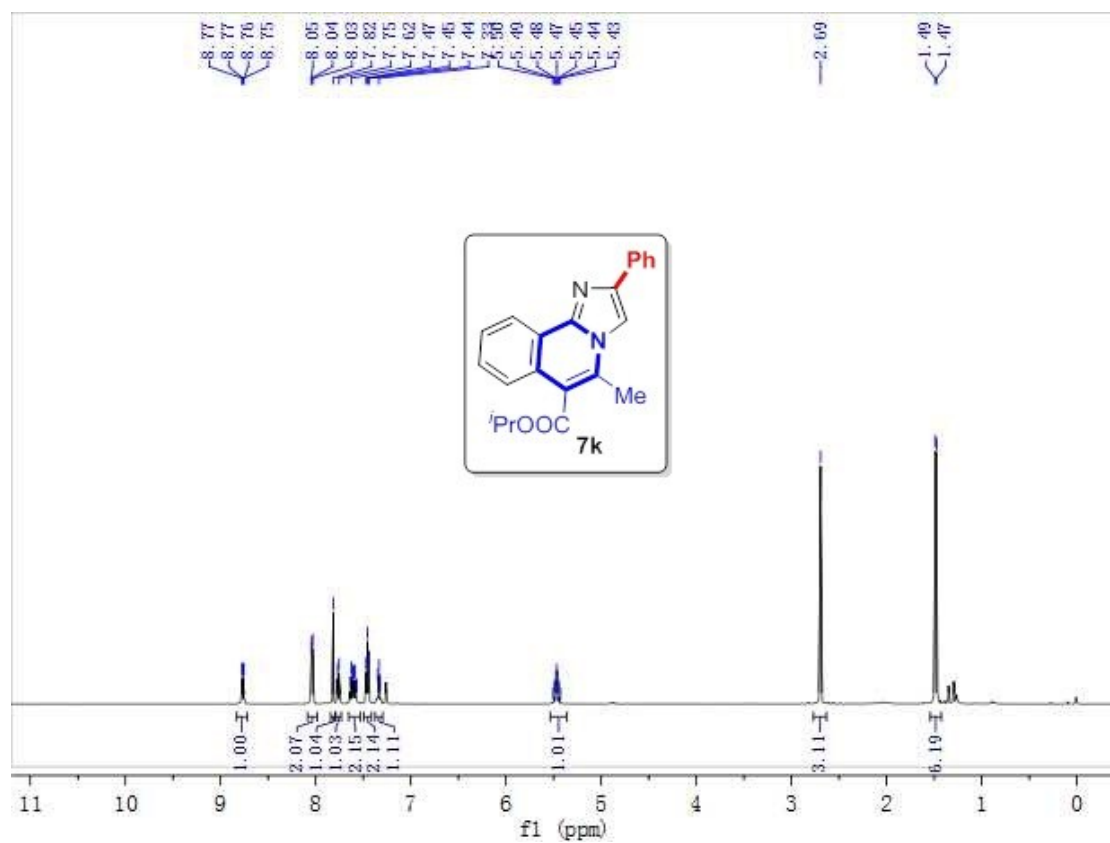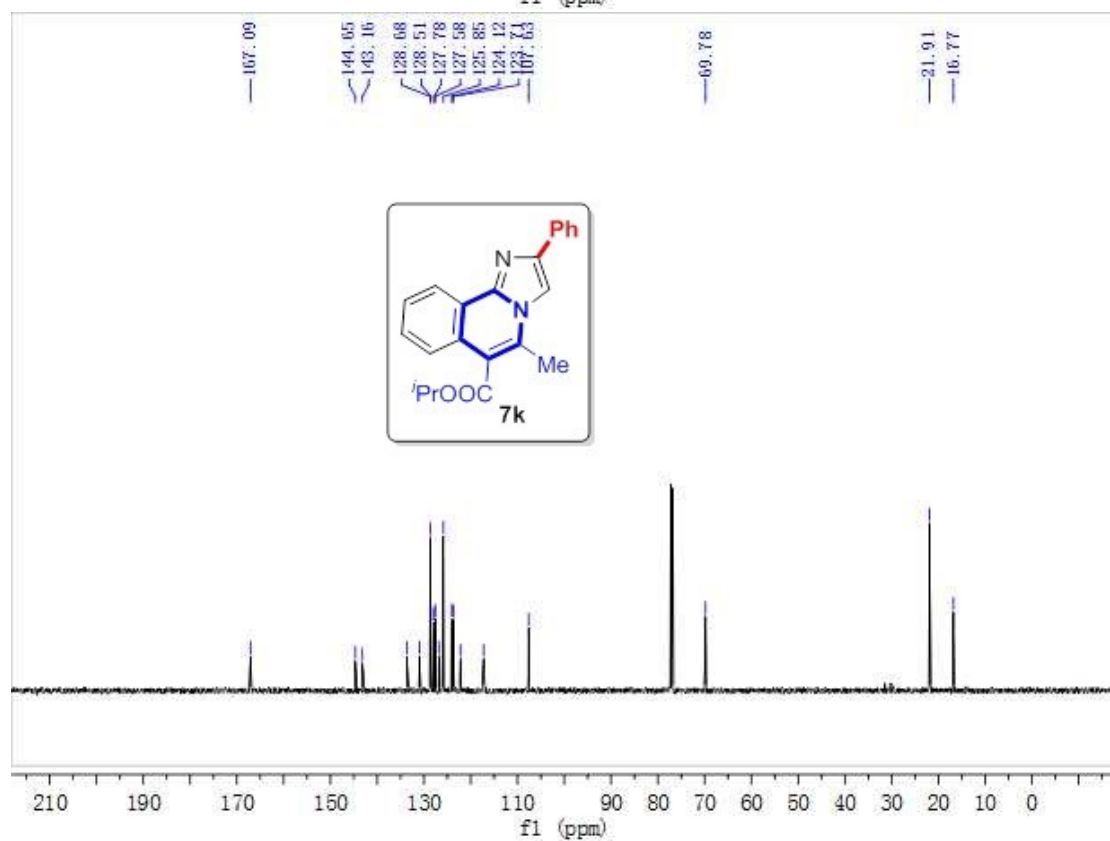

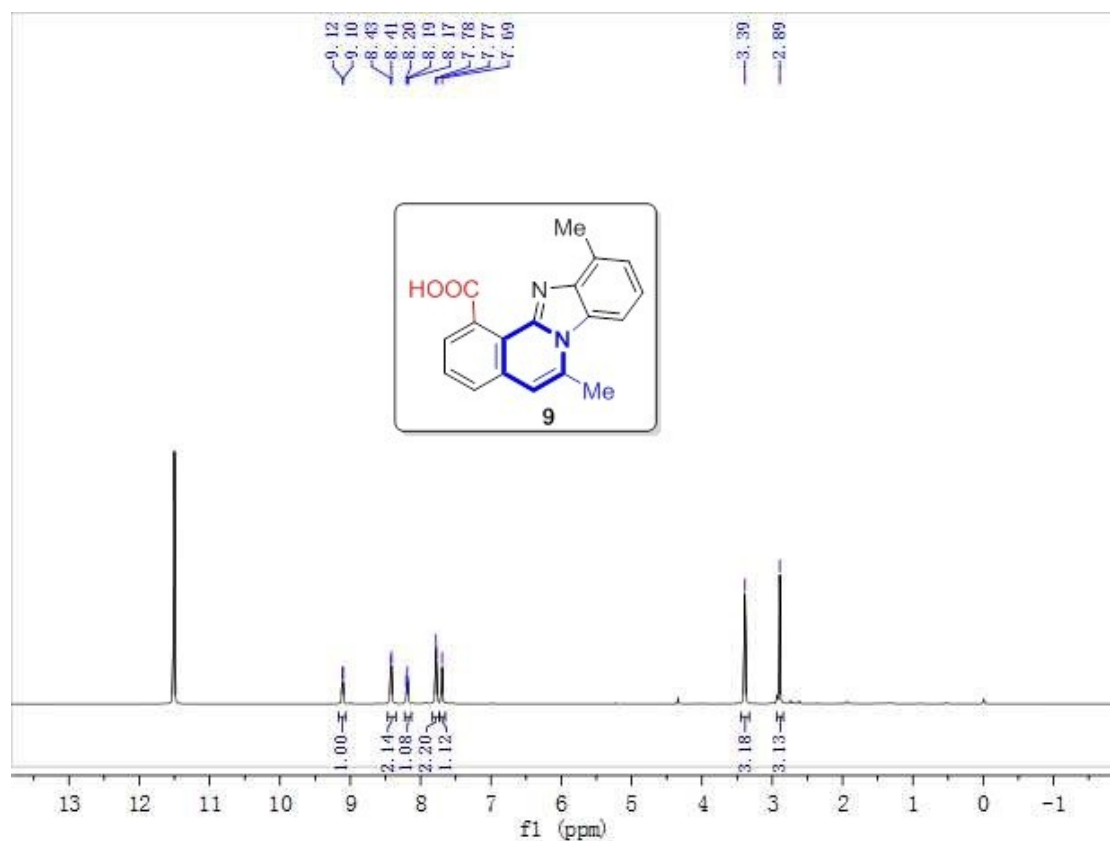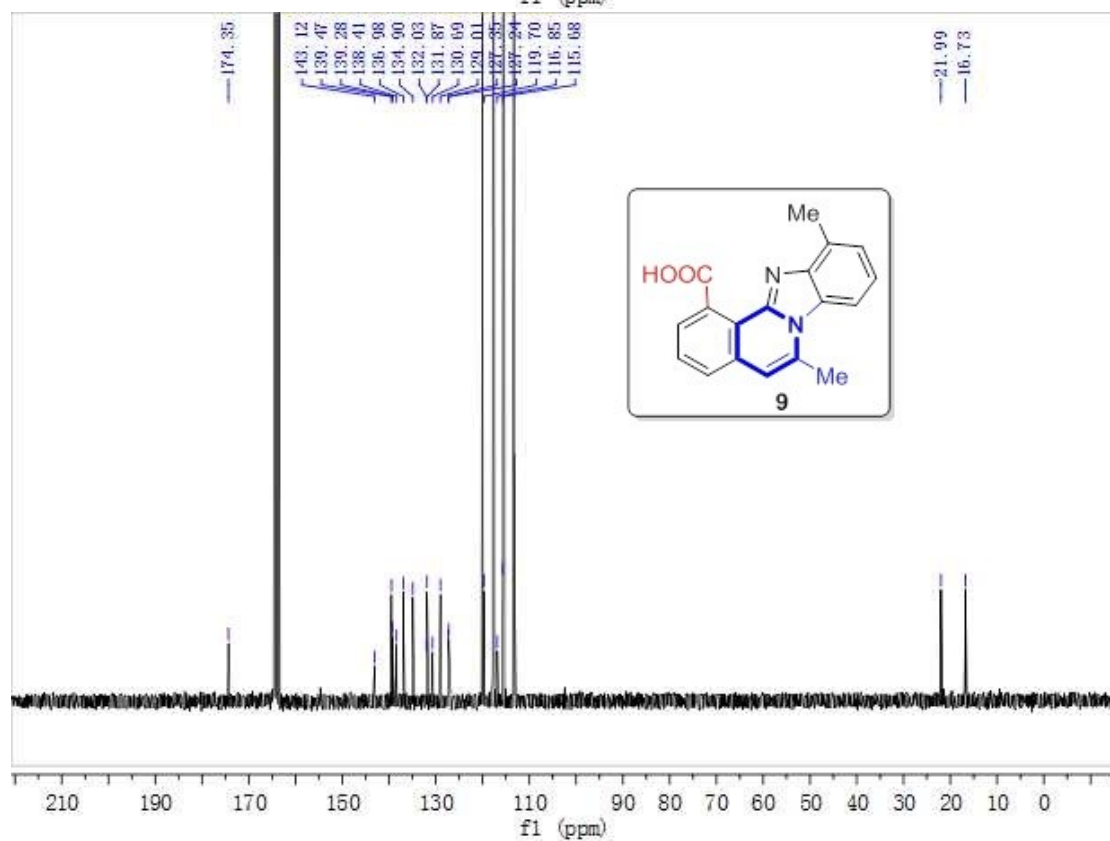

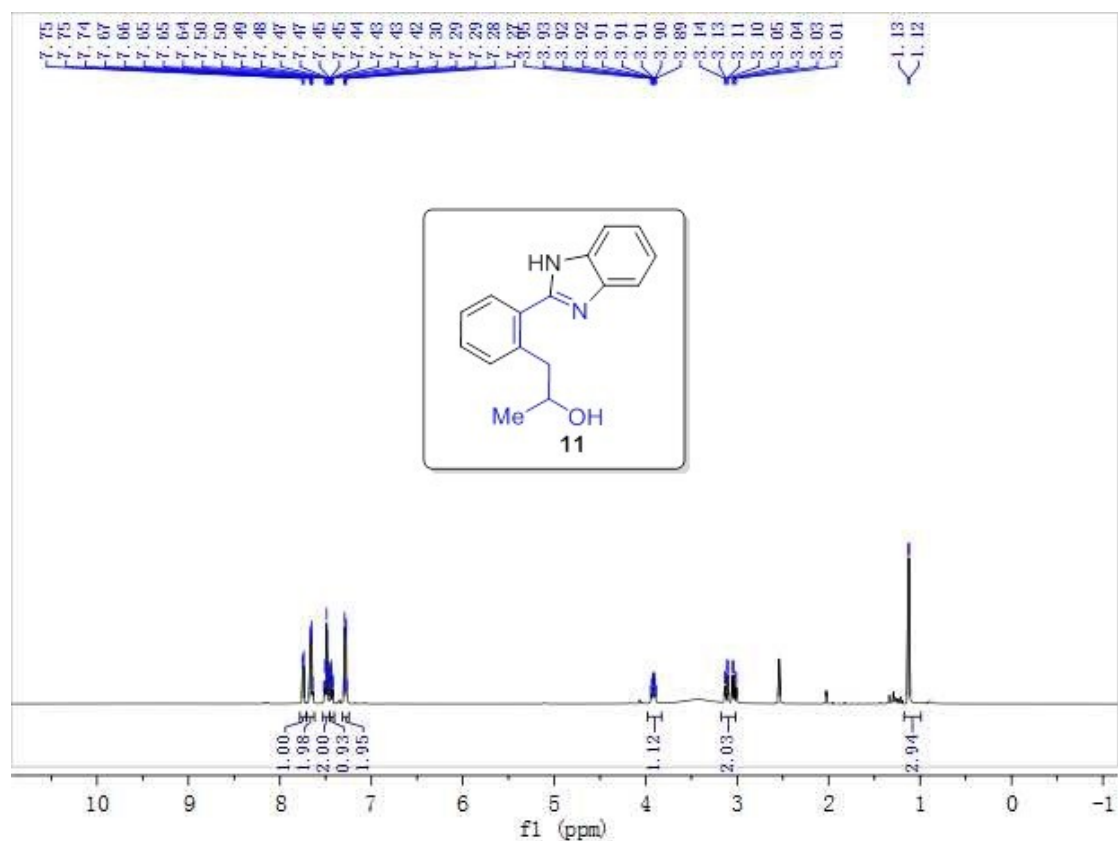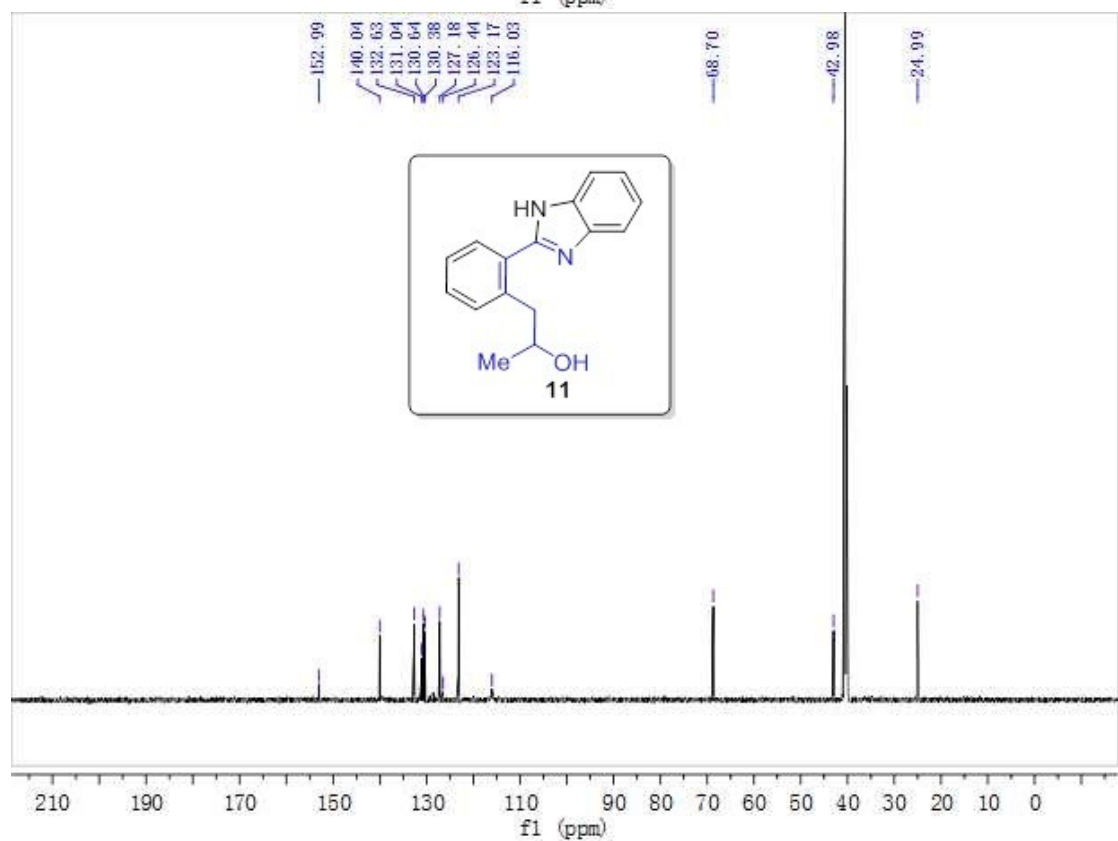

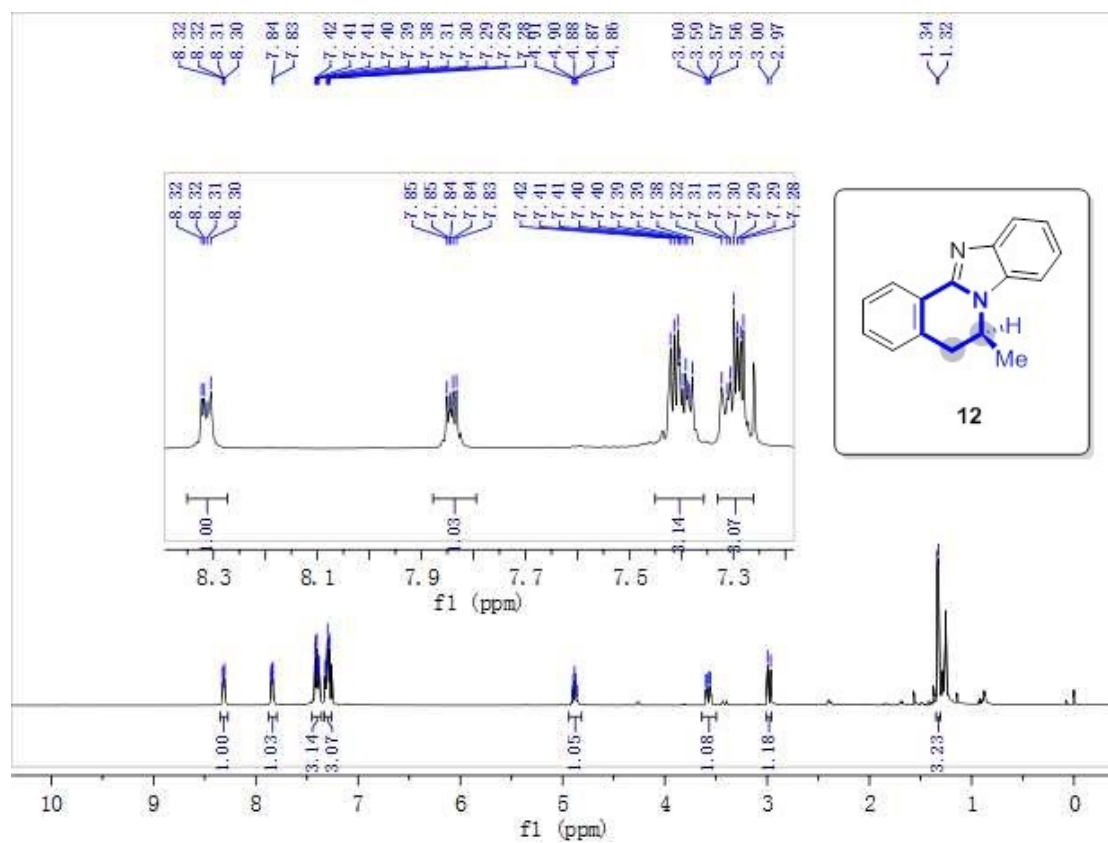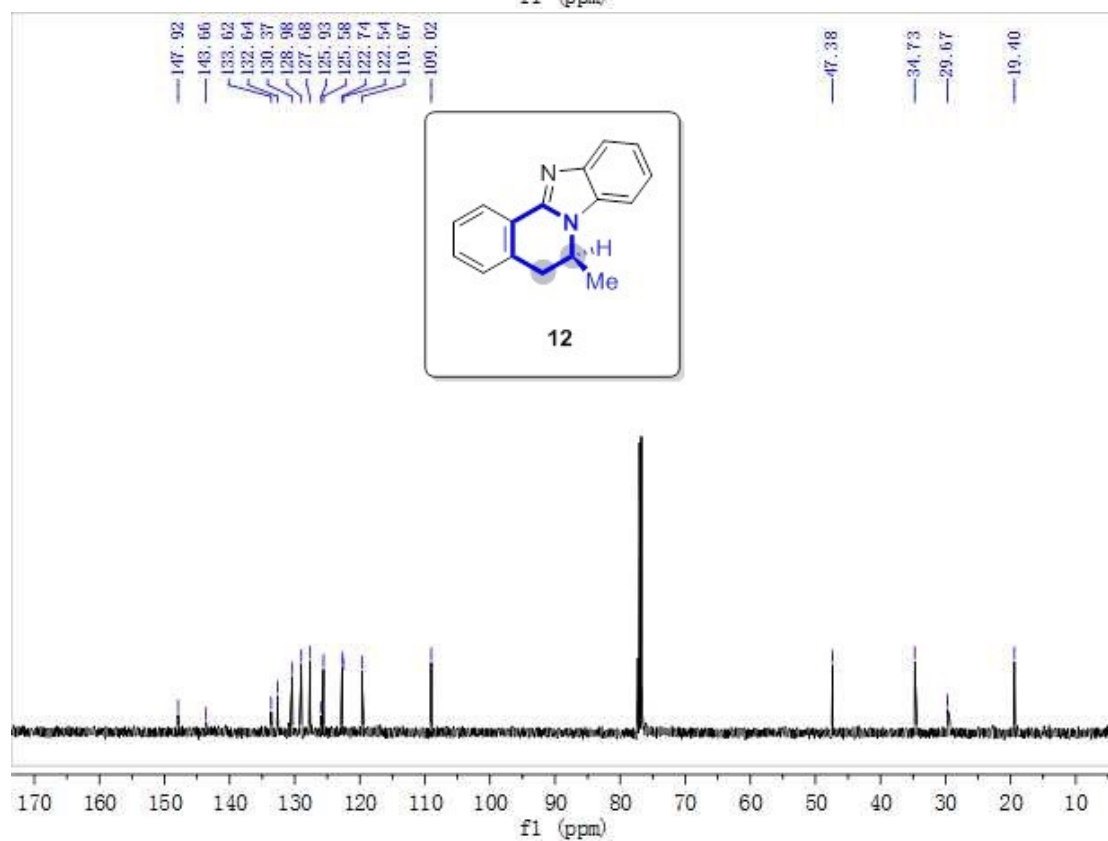

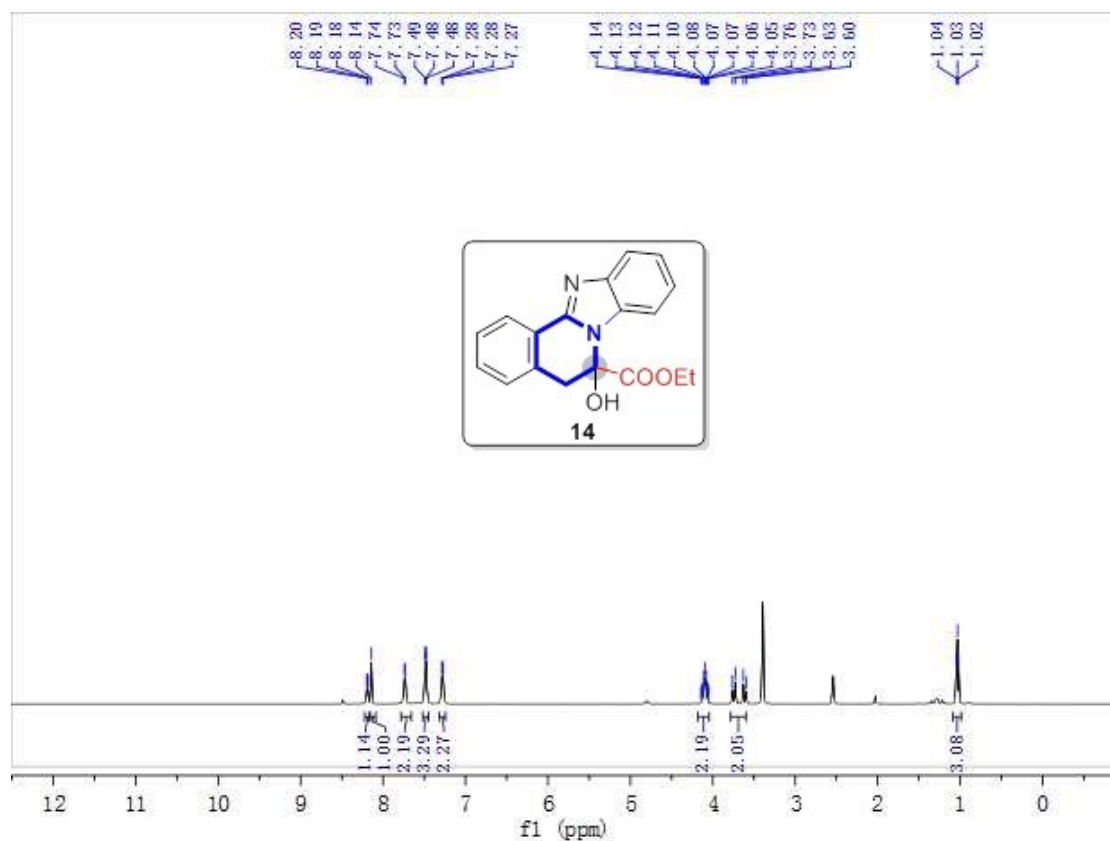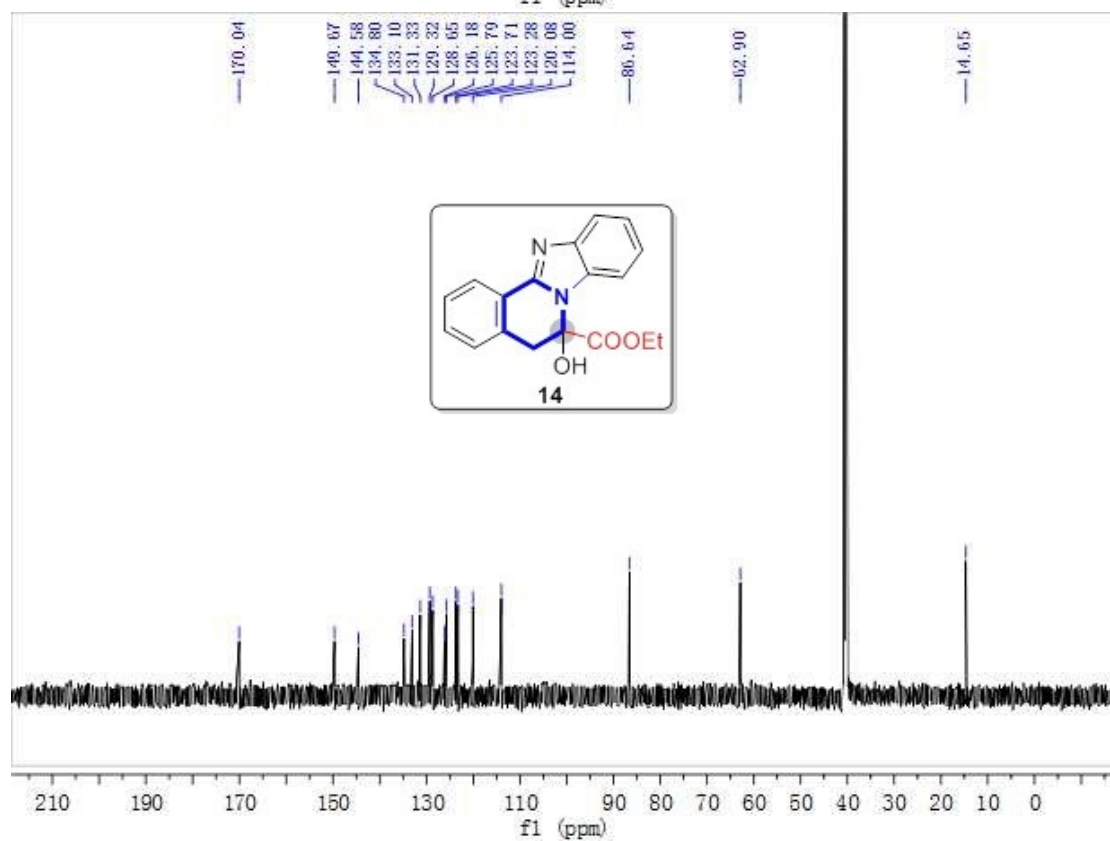

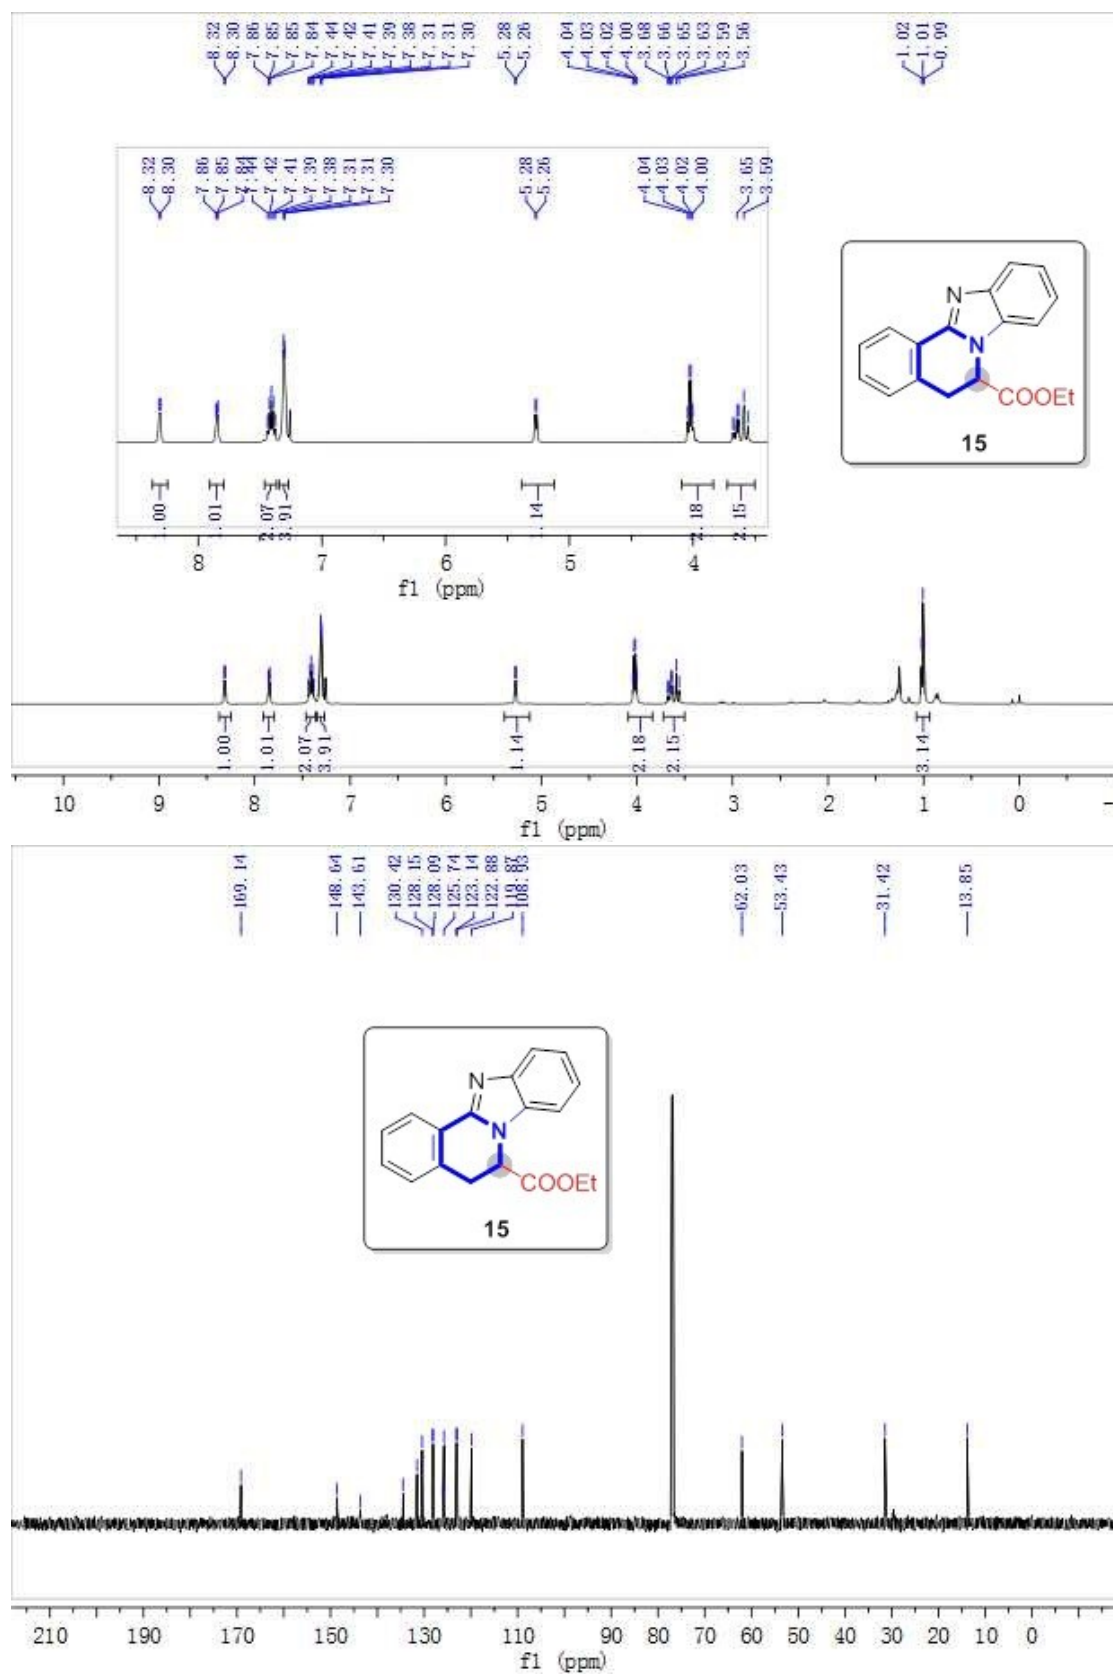

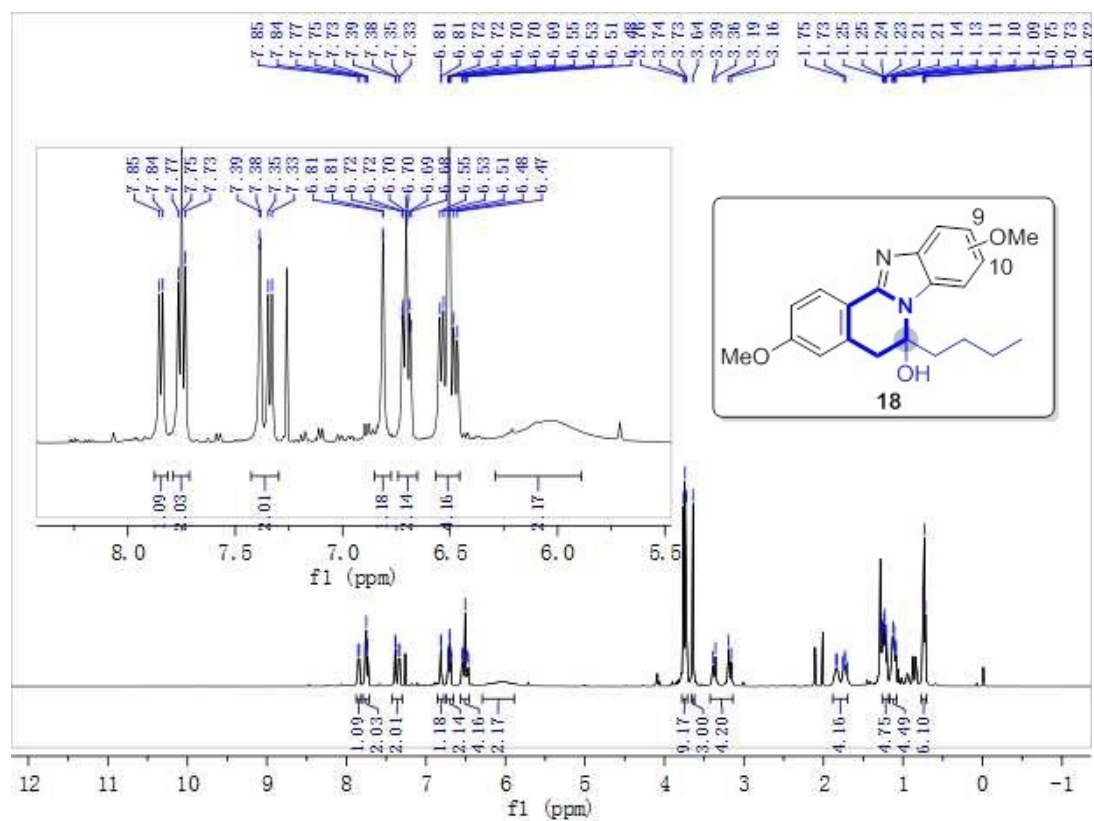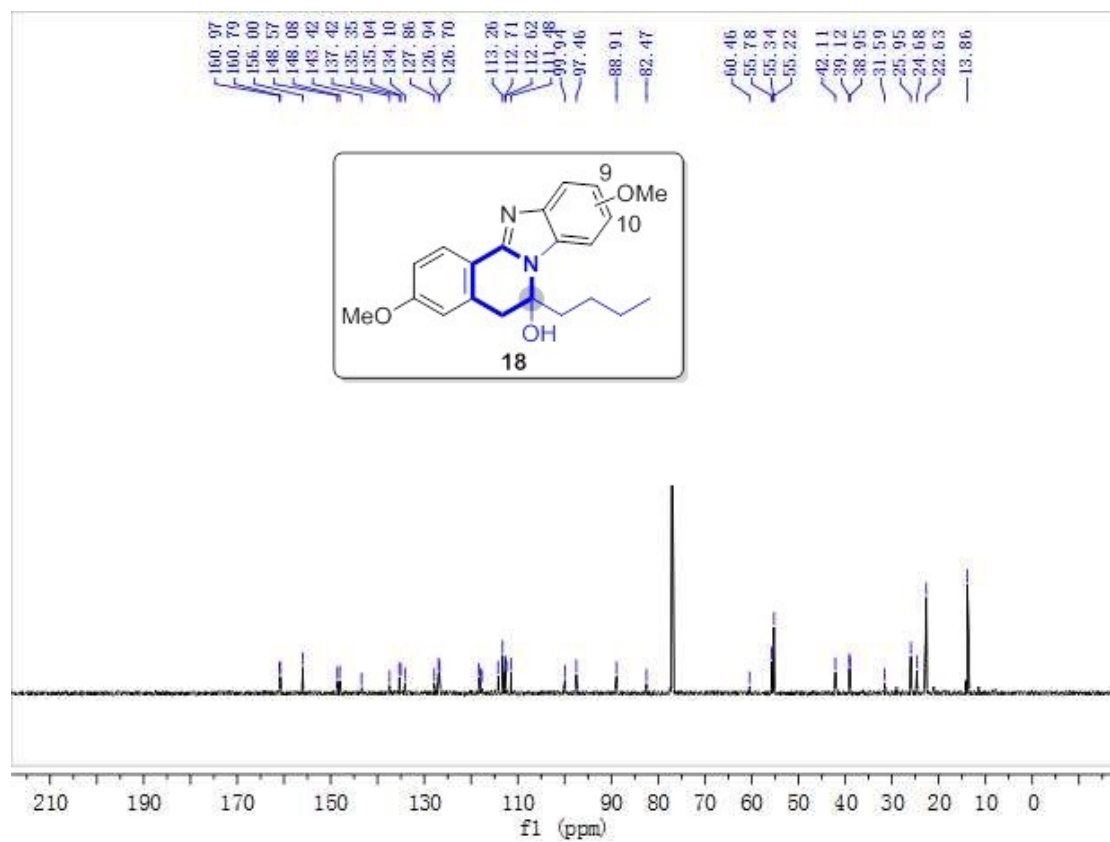



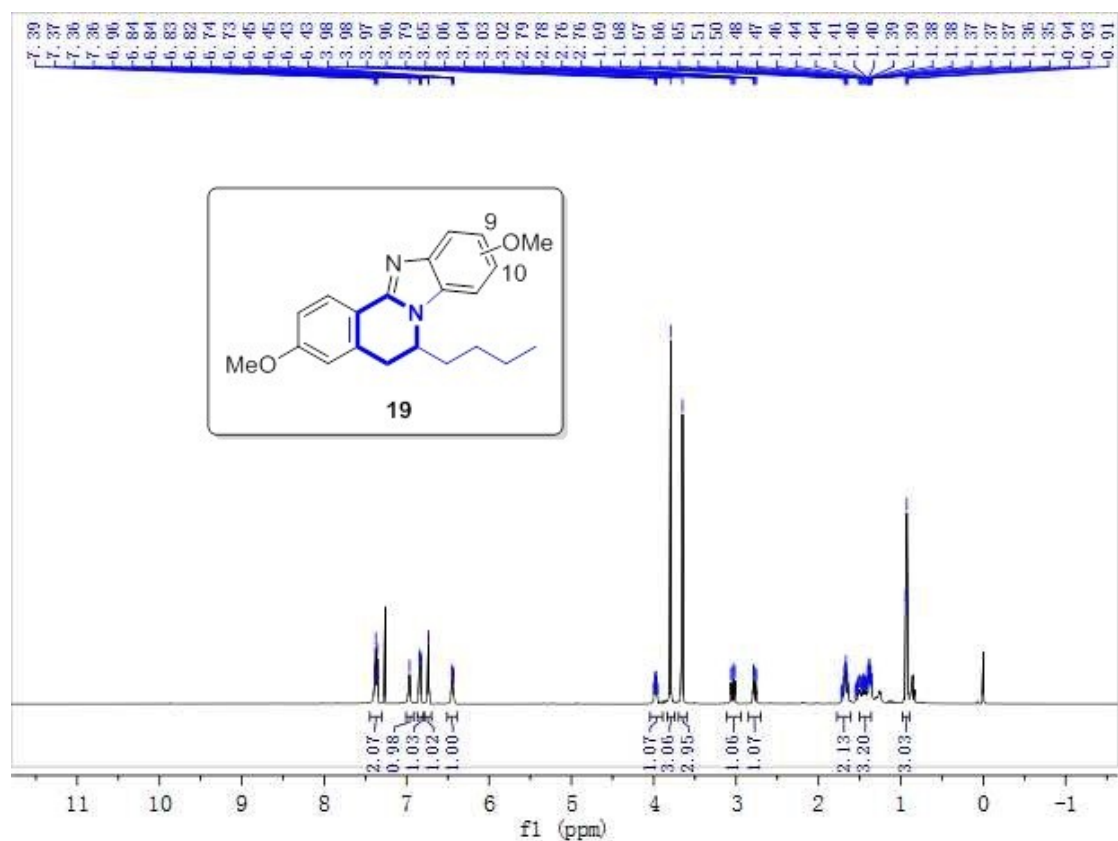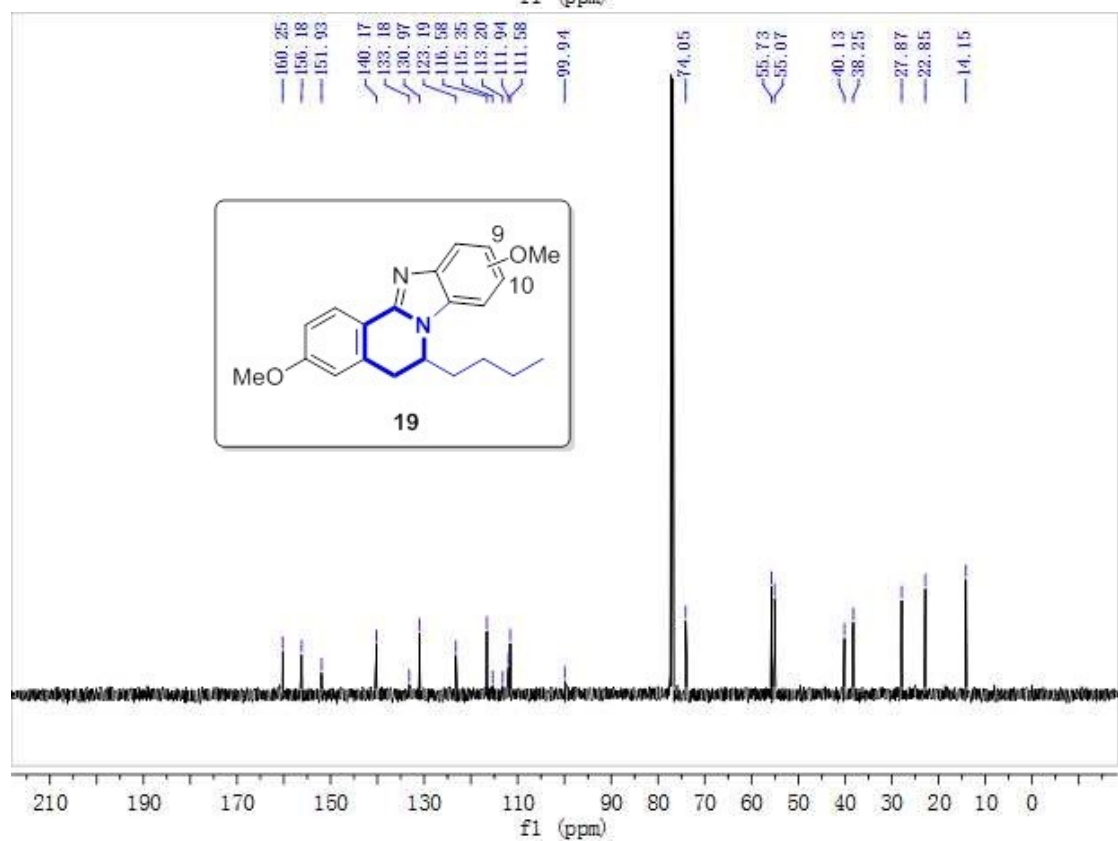

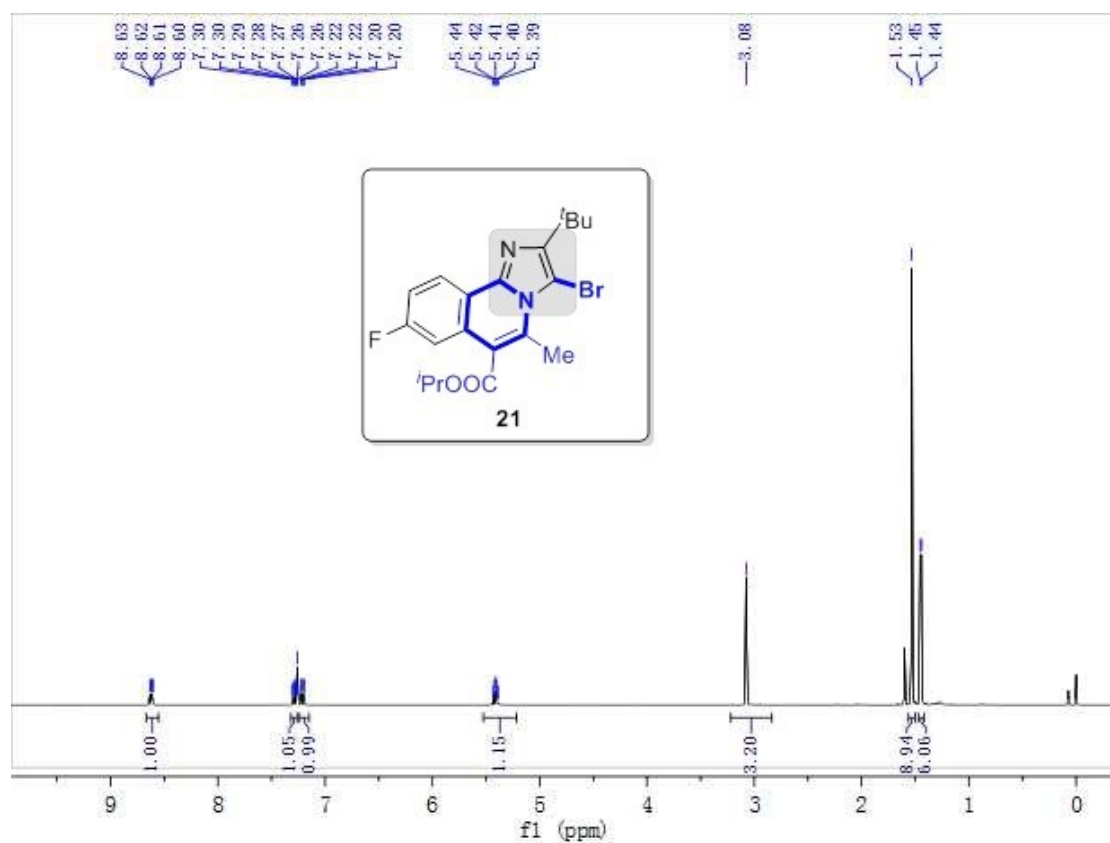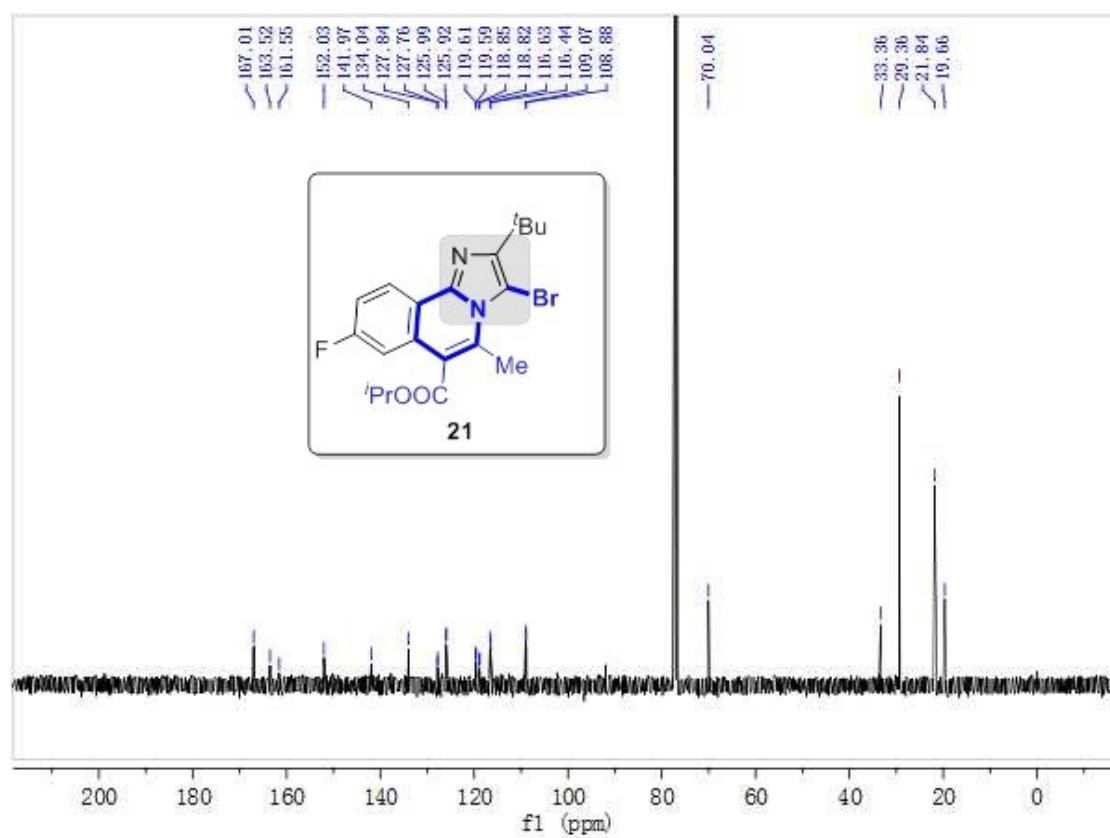

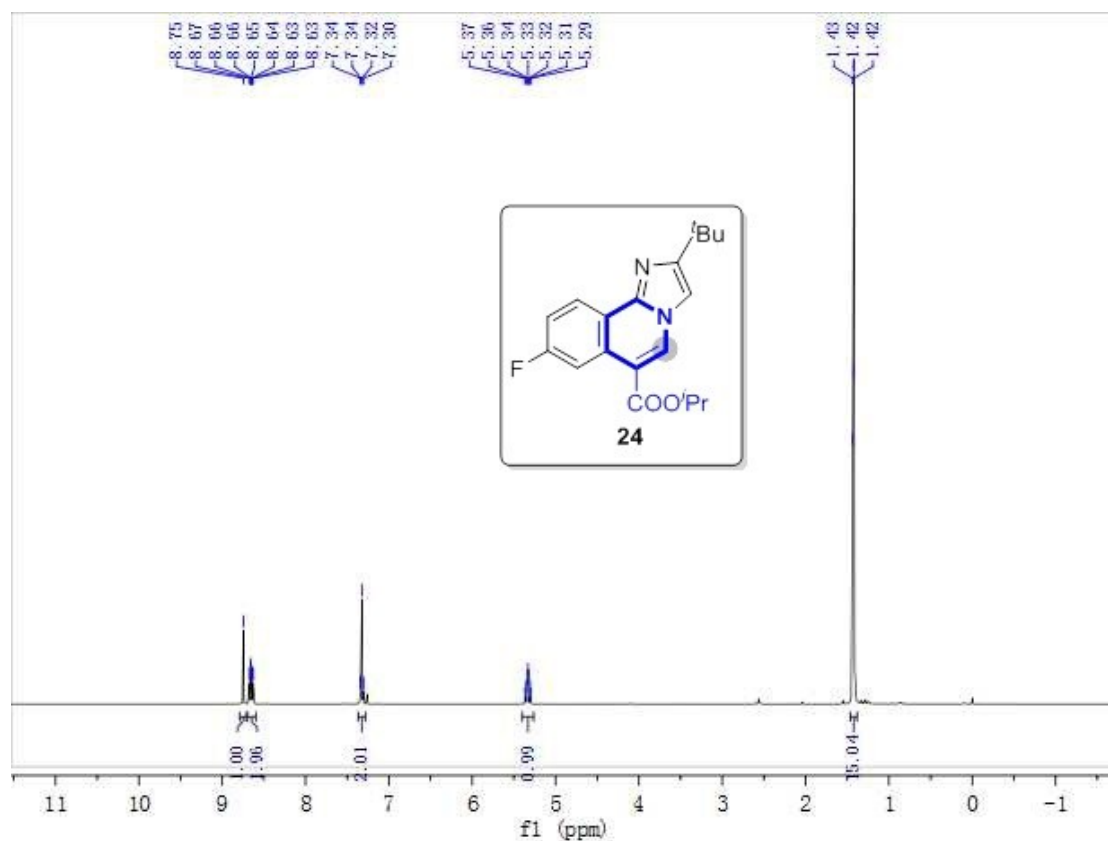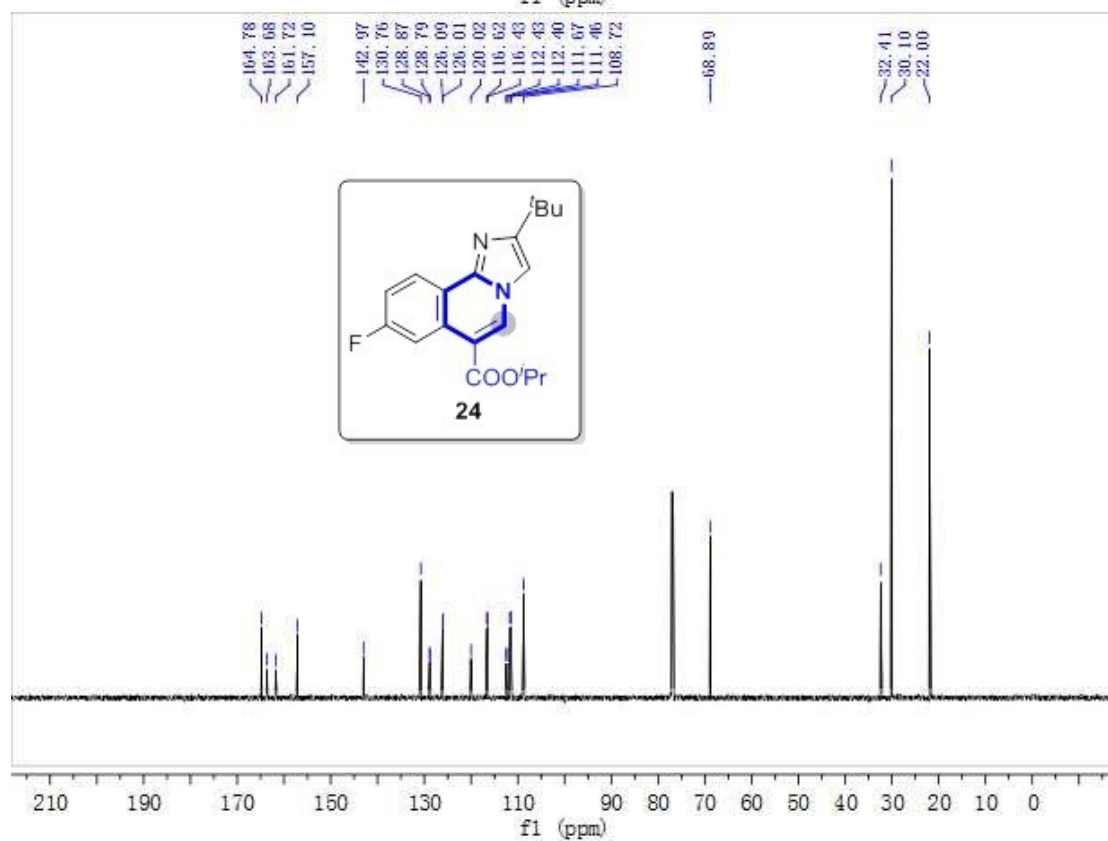

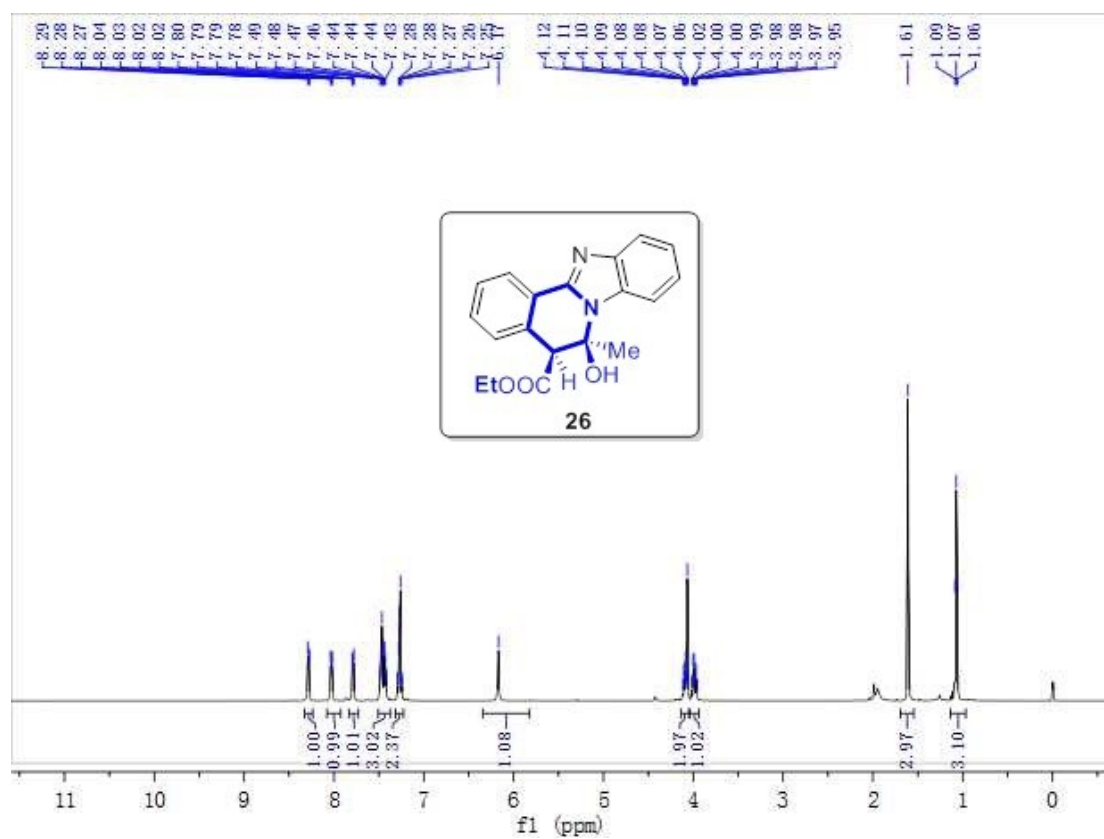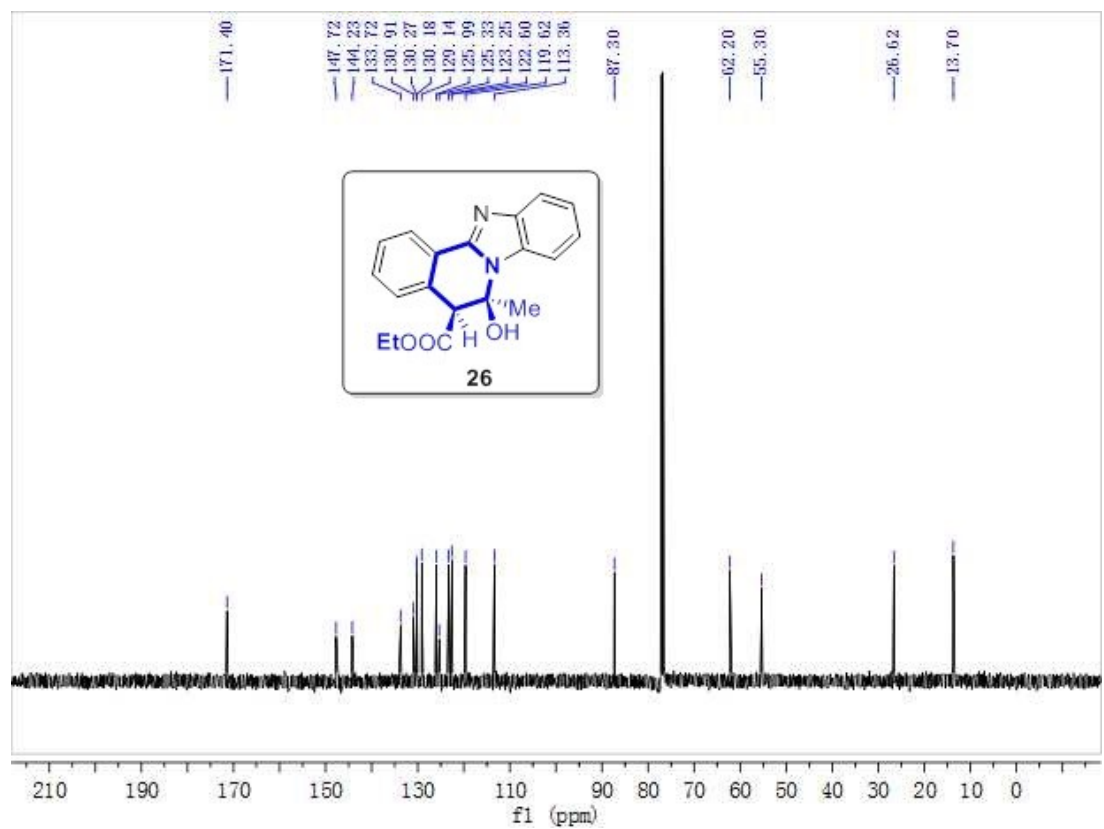

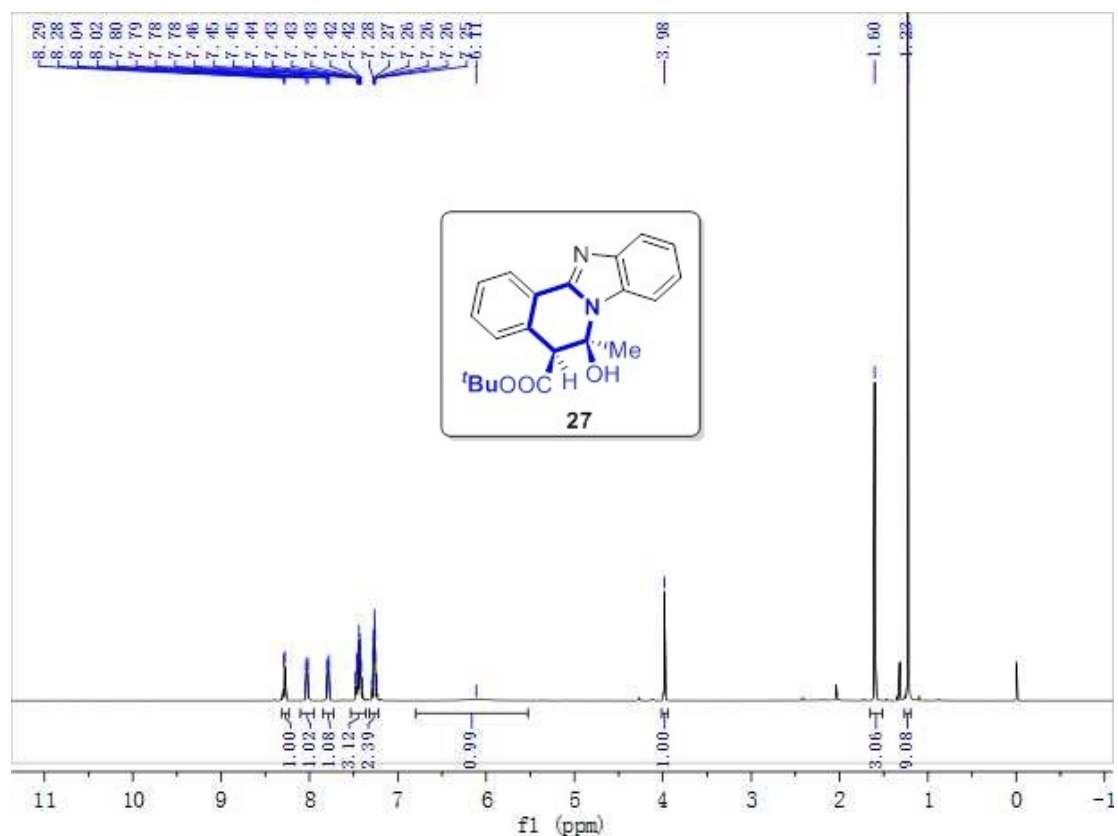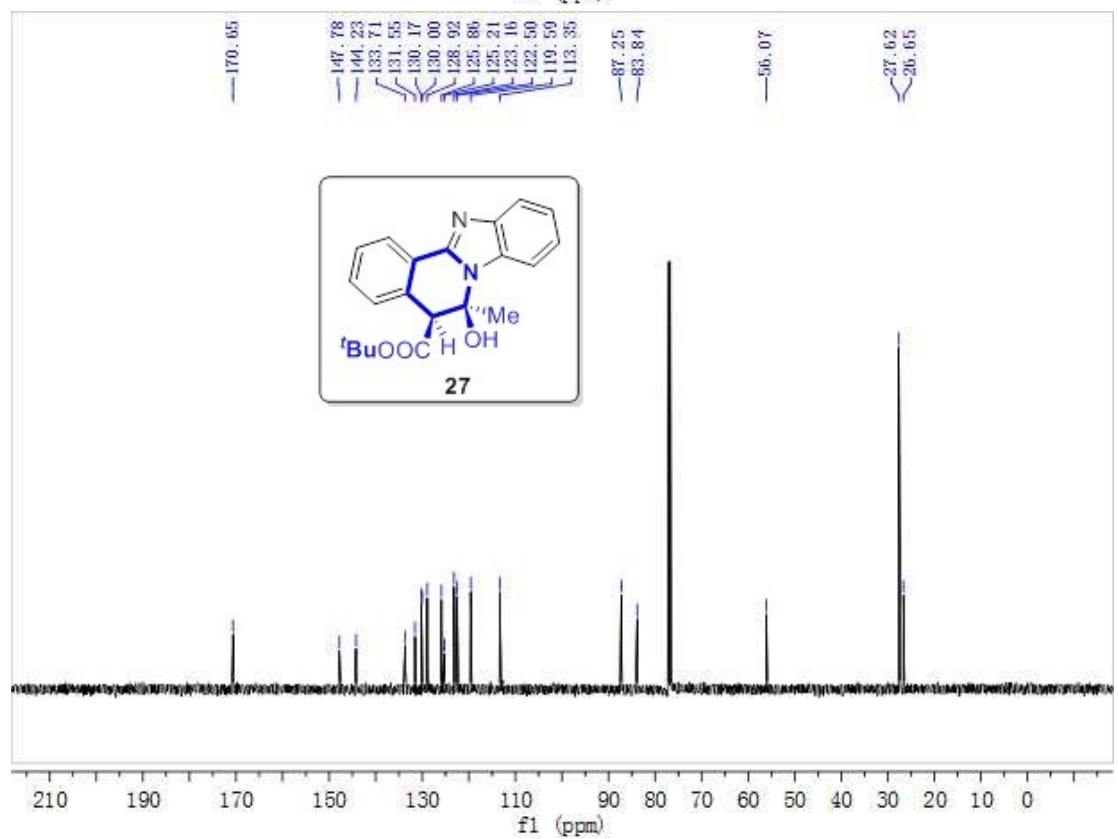

Supplement: c8cc05390a1.pdf [file c8cc05390a1.pdf]
